# Supplementary material for: Cu( i )-catalyzed dearomatizing cascade of thiazoles using two molecules of an α-aryl-α-diazoester: a novel approach for the synthesis of densely substituted 4-thiazolines
Source: Royal Society of Chemistry journal article supplement (doi:10.1039/d4qo01233j), 2024-01-01

Supporting information for

**Cu(I)-Catalyzed Dearomatizing Cascade of Thiazoles using  
Two Molecules of an  $\alpha$ -Aryl- $\alpha$ -Diazoester: A Novel  
Approach for the Synthesis of Densely Substituted 4-  
Thiazolines**

Ying Ran, Xingrong Ye, Mingli Liu and Xichen Xu\*

State Key Laboratory of New Textile Materials and Advanced Processing  
Technologies, Wuhan Textile University, Wuhan, Hubei 430073, P. R. China.

[xcxu@wtu.edu.cn](mailto:xcxu@wtu.edu.cn)

**Table of Contents**

|                                                                                                    |             |
|----------------------------------------------------------------------------------------------------|-------------|
| <b>1. General information</b> .....                                                                | <b>S1</b>   |
| <b>2. List of organic compounds used and prepared as starting materials</b> .....                  | <b>S3</b>   |
| <b>3. The preparation of 5-trimethylsilylthiazole 2a</b> .....                                     | <b>S4</b>   |
| <b>4. Representative procedure for the preparation of 4-thiazoline 3a</b> .....                    | <b>S5</b>   |
| <b>5. Optimizing of the reaction conditions</b> .....                                              | <b>S6</b>   |
| <b>6. List of organic compounds prepared as products</b> .....                                     | <b>S7</b>   |
| <b>7. Characterization data of 1a-1r</b> .....                                                     | <b>S8</b>   |
| <b>8. Characterization data of 2a and 2k</b> .....                                                 | <b>S12</b>  |
| <b>9. Characterization data of 3a-3f, 4a-4i, 5a-5l</b> .....                                       | <b>S13</b>  |
| <b>10. Copies of <sup>1</sup>H NMR spectra of 1a-1r, 2a and 2k, 3a-3f, 4a-4i, 5a-5l</b> .....      | <b>S25</b>  |
| <b>11. Copies of <sup>13</sup>C NMR spectra of 3a, 3c-3f, 4a-4i, 5a-5l</b> .....                   | <b>S72</b>  |
| <b>12. X-Ray crystallographic data of 3b</b> .....                                                 | <b>S98</b>  |
| <b>13. Representative procedure for monitoring of the reaction progress by HPLC analysis</b> ..... | <b>S106</b> |
| <b>13. The study of kinetic isotope effect</b> .....                                               | <b>S112</b> |

### **General Information:**

All chemicals were purchased from commercial sources and used without purification unless otherwise noted. Transition metal catalysts were purchased from commercial suppliers and stored at room temperature in a glove box filled with nitrogen gas, maintaining an oxygen and water level of less than 100 ppm for stability. Toluene was distilled under a nitrogen atmosphere using sodium metal as a desiccant to ensure purity during the process. All reactions were conducted in a nitrogen gas environment using standard Schlenk techniques for optimal conditions. The Schlenk tube, equipped with a PTFE-coated magnetic stirring bar, was washed with aqua regia before being thoroughly rinsed with deionized water and then dried in an oven at 130 degrees Celsius to ensure cleanliness and dryness. Prior to use, the Schlenk tube, equipped with a magnetic stirring bar, was transferred to a glove box for further handling. Analytical Thin Layer Chromatography (TLC) was performed on 0.25 mm precoated silica gel 60F254 plates, which were used for visualization under UV light at either 254 or 365 nm wavelengths. Alternatively, TLC plates could be stained with anisaldehyde, cerium ammonium molybdate or potassium permanganate and then heated for better visualization of the separated components. Unless otherwise specified, column chromatography was performed on silica gel (500-800 mesh) as the stationary phase and elution was performed with a mixture of hexanes/ethyl acetate (EtOAc).

Nuclear magnetic resonance (NMR) spectra were acquired using a high-resolution 400 MHz spectrometer with deuterated solvent as the medium. The resulting  $^1\text{H}$  NMR spectra are presented in the following format: chemical shifts ( $\delta$  ppm), multiplicities, coupling constants (Hz), and integrals. To ensure accurate referencing, the  $^1\text{H}$  chemical shifts have been referenced to the residual solvent signal ( $\delta$  H 7.26 for  $\text{CDCl}_3$ ). The multiplicities are indicated as s (singlet), d (doublet), t (triplet), dd (doublet of doublet), dt (doublet of triplet), m (multiplet), brs (broad singlet), and so on, depending on the number of peaks observed. For  $^{13}\text{C}$  NMR spectra, data were collected at 100 MHz resolution. The resulting  $^{13}\text{C}$  NMR spectra are reported in terms of chemical shifts with respect to the solvent signal ( $\delta$  C 77.0 for  $\text{CDCl}_3$ ).

Nuclear magnetic resonance (NMR) spectra were obtained in collaboration with the Analytical Center of Wuhan Textile University, which provided the necessary equipment and expertise for data collection. High-resolution mass spectrometry was performed using a conventional instrument equipped with a time-of-flight (TOF) analyzer. The service for this test was outsourced to ShanGuan Technology Services (Guangzhou) Co, which provided the necessary resources and expertise for data acquisition. For single crystal X-ray analysis, high-quality crystals were grown by slowly evaporating a solution containing **3b** in ethyl acetate at room temperature. The single crystal samples were then sent to ShanGuan Technology Services (Guangzhou) Co. for data collection and interpretation.

## List of organic compounds used and prepared as starting materials:

Aryl diazoacetates (**1a-1r**) were synthesized in accordance with a well-established procedure.<sup>1</sup> Thiazole **2a** were prepared by modifying the reaction solvent from diethyl ether to tetrahydrofuran (THF) under otherwise identical conditions, as reported in the literature. The thiazoles (**2b-2j**) employed in this study were sourced from commercial suppliers to guarantee their availability and quality. Prior to utilization in the experimental procedures, both sets of compounds underwent high-performance liquid chromatography (HPLC) analysis to verify their purity levels. The results confirmed a minimum purity of 95% or higher for the aryl diazoacetates (**1a-1r**) and thiazoles (**2a-2k**).

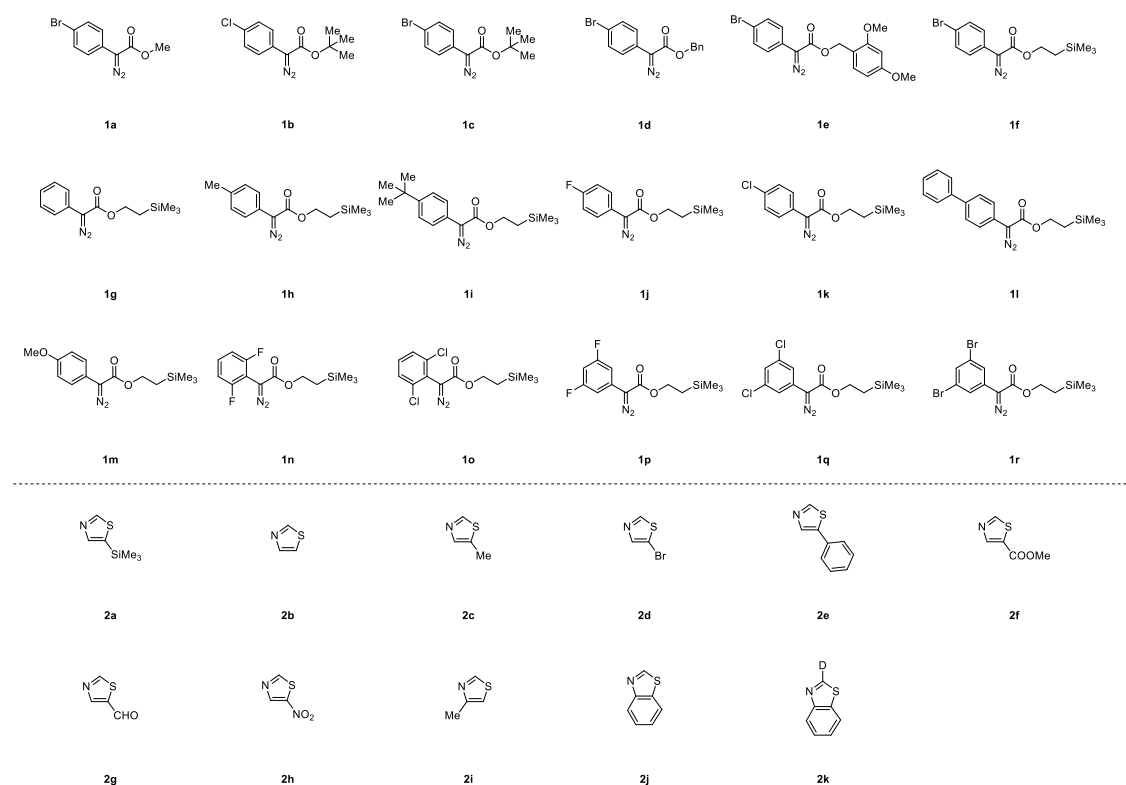

## Reference:

- (a) D. Maiti, R. Das, S. Sen, *J. Org. Chem.* **2021**, *86*, 2522-2533; (b) J. Zhu, R. Li, Y. Su, P. Gu, *J. Org. Chem.* **2019**, *84*, 5813-5820.

### The preparation of 5-trimethylsilylthiazole 2a:

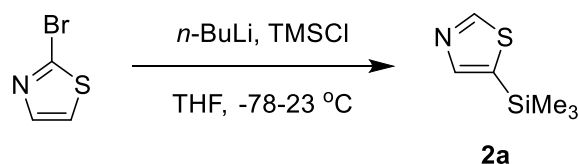

A dry, clean 250 mL Schlenk tube equipped with a stir bar was placed in a low-temperature bath precooled to -78 °C. The Schlenk line was purged with nitrogen gas three times via standard vacuum/pressure cycling techniques. The tube was then sealed with a rubber stopper under an inert nitrogen atmosphere. Under continued nitrogen protection, anhydrous tetrahydrofuran (THF) solution (50 mL) and *n*-butyl lithium (*n*-BuLi) solution (17 mL, 33.6 mmol) were added to the Schlenk tube via syringe. The reaction mixture was stirred for 15 minutes at -78 °C. Subsequently, 2-bromothiazole (5.000 g, 30.5 mmol) was introduced into the reaction mixture dropwise via a syringe pump over 30 minutes. Trimethylchlorosilane (3.310 g, 30.5 mmol) was added using a syringe in one portion. Stirring continued for an additional 2 hours at -78 °C. The Schlenk tube was sealed and allowed to slowly warm to room temperature over several hours while stirring. The reaction mixture was stirred overnight at room temperature. The reaction was quenched by carefully adding a saturated sodium bicarbonate solution (30 mL). The resulting mixture was extracted with dichloromethane (DCM, 20 mL × 3). The combined organic layers were dried over anhydrous sodium sulfate and filtered. The solvent was removed under reduced pressure using a rotary evaporator. The crude product was purified by distillation to yield 5-(trimethylsilyl)thiazole 2a (2.543 g, 53% yield).

**Representative procedure for the preparation of 4-thiazoline 3a (the same procedure has been applied for the synthesis of 3a-3f, 4a-4i, 5a-5l):**

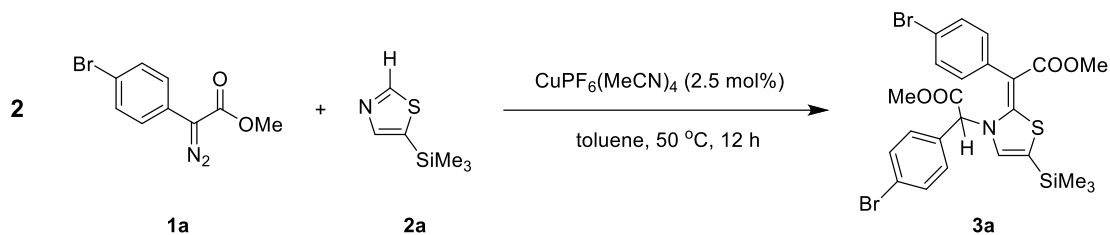

A 25 mL Schlenk tube, equipped with a magnetic stirring bar, was transferred to a glove box maintained at a controlled atmosphere filled with nitrogen and the water and oxygen levels were preserved below 100 ppm.  $\text{CuPF}_6(\text{MeCN})_4$  (1.864 mg, 5.000  $\mu\text{mol}$ ) was weighed within the glove box and added to the Schlenk tube. Using a microliter syringe, 5-(trimethylsilyl)thiazole **2a** (31.0 mg, 0.200 mmol) was subsequently added to the Schlenk tube. The Schlenk tube was then added a solution of methyl 2-(4-bromophenyl)-2-diazoacetate **1a** (107 mg, 0.420 mmol) dissolved in toluene (1.50 mL) in one portion. The Schlenk tube was sealed and then removed from the glove box and heated in an oil bath at 50 °C with stirring for 12 hours. After cooling to room temperature, the reaction mixture was then transferred to a glass vial and concentrated under reduced pressure, resulting in the formation of a residue. The crude product was subsequently purified using a silica gel column, eluting with a mixture of hexanes and EtOAc. Collected fractions yielded methyl (Z)-2-(4-bromophenyl)-2-(3-(1-(4-bromophenyl)-2-methoxy-2-oxoethyl)-5-(trimethylsilyl)thiazol-2(3H)-ylidene)acetate **3a** (101 mg, 0.166 mmol, 83% yield), which appeared as a yellow solid.

## Optimizing of the reaction conditions:

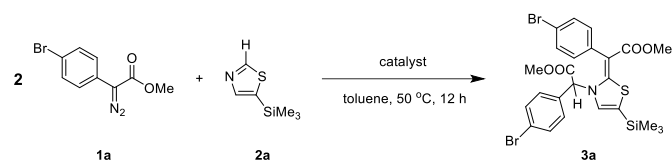

| Entry <sup>a</sup> | Catalyst                              | Catalyst loading | Solvent | concentration (mol/L) | Temperature | Molar ratio of <b>1a:2a</b> | Yield of <b>3a</b> <sup>b</sup> |
|--------------------|---------------------------------------|------------------|---------|-----------------------|-------------|-----------------------------|---------------------------------|
| 1                  | CuPF <sub>6</sub> (MeCN) <sub>4</sub> | 5 mol%           | 1.0 mL  | 0.20                  | 50 °C       | 1.10:1.00                   | 33%                             |
| 2                  | CuPF <sub>6</sub> (MeCN) <sub>4</sub> | 5 mol%           | 1.0 mL  | 0.20                  | 50 °C       | 2.10:1.00                   | 63%                             |
| 3                  | CuPF <sub>6</sub> (MeCN) <sub>4</sub> | 1.0 mol%         | 1.0 mL  | 0.20                  | 50 °C       | 2.10:1.00                   | 57%                             |
| 4                  | CuPF <sub>6</sub> (MeCN) <sub>4</sub> | 2.5 mol%         | 1.0 mL  | 0.20                  | 50 °C       | 2.10:1.00                   | 76%                             |
| 5                  | CuPF <sub>6</sub> (MeCN) <sub>4</sub> | 5 mol%           | 1.0 mL  | 0.20                  | 50 °C       | 2.10:1.00                   | 50%                             |
| 6                  | CuPF <sub>6</sub> (MeCN) <sub>4</sub> | 10 mol%          | 1.0 mL  | 0.20                  | 50 °C       | 2.10:1.00                   | 27%                             |
| 7                  | none                                  | N.A.             | 1.0 mL  | 0.20                  | 50 °C       | 2.10:1.00                   | No reaction                     |
| 8                  | Cu(OTf) <sub>2</sub>                  | 2.5 mol%         | 1.0 mL  | 0.20                  | 50 °C       | 2.10:1.00                   | No reaction                     |
| 9                  | Rh <sub>2</sub> (OAc) <sub>4</sub>    | 2.5 mol%         | 1.0 mL  | 0.20                  | 50 °C       | 2.10:1.00                   | Complex mixture                 |
| 10                 | Rh <sub>2</sub> (esp) <sub>2</sub>    | 2.5 mol%         | 1.0 mL  | 0.20                  | 50 °C       | 2.10:1.00                   | Complex mixture                 |
| 11                 | CuPF <sub>6</sub> (MeCN) <sub>4</sub> | 2.5 mol%         | 1.0 mL  | 0.20                  | 23 °C       | 2.10:1.00                   | 13%                             |
| 12                 | CuPF <sub>6</sub> (MeCN) <sub>4</sub> | 2.5 mol%         | 1.0 mL  | 0.20                  | 60 °C       | 2.10:1.00                   | 82%                             |
| 13                 | CuPF <sub>6</sub> (MeCN) <sub>4</sub> | 2.5 mol%         | 0.5 mL  | 0.40                  | 50 °C       | 2.10:1.00                   | 74%                             |
| 14                 | CuPF <sub>6</sub> (MeCN) <sub>4</sub> | 2.5 mol%         | 1.0 mL  | 0.20                  | 50 °C       | 2.10:1.00                   | 76%                             |
| 15                 | CuPF <sub>6</sub> (MeCN) <sub>4</sub> | 2.5 mol%         | 1.5 mL  | 0.13                  | 50 °C       | 2.10:1.00                   | 83%                             |
| 16                 | CuPF <sub>6</sub> (MeCN) <sub>4</sub> | 2.5 mol%         | 2.0 mL  | 0.10                  | 50 °C       | 2.10:1.00                   | 76%                             |
| 17                 | CuPF <sub>6</sub> (MeCN) <sub>4</sub> | 2.5 mol%         | 2.5 mL  | 0.08                  | 50 °C       | 2.10:1.00                   | 79%                             |

<sup>a</sup>The reaction was performed on a scale of 0.20 mmol, with **2a** serving as the limiting reagent, under a nitrogen atmosphere. <sup>b</sup>isolated yield.

## List of organic compounds prepared as products:

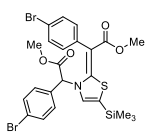

3a

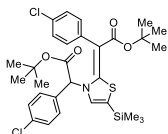

3b

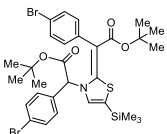

3c

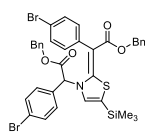

3d

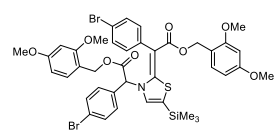

3e

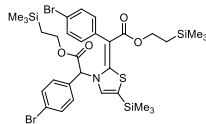

3f

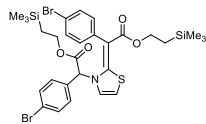

4a

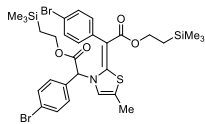

4b

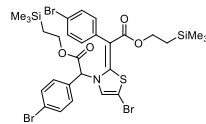

4c

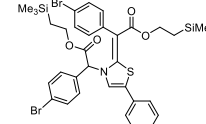

4d

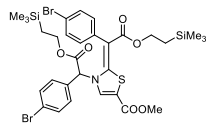

4e

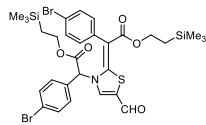

4f

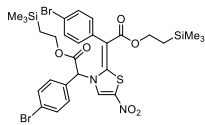

4g

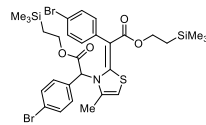

4h

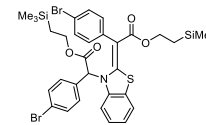

4i

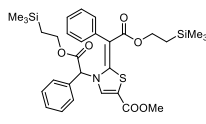

5a

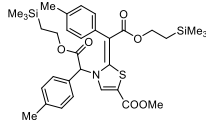

5b

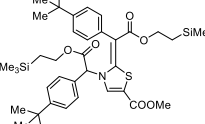

5c

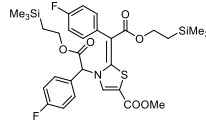

5d

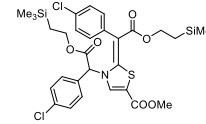

5e

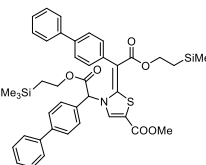

5f

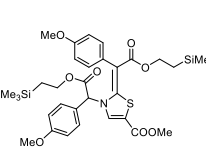

5g

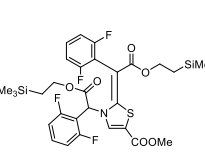

5h

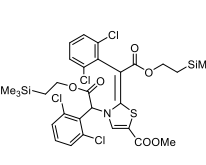

5i

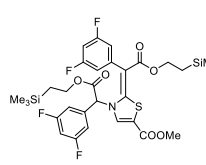

5j

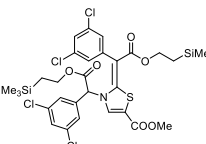

5k

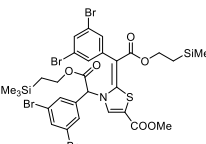

5l



**Characterization data of 1a-1f:**

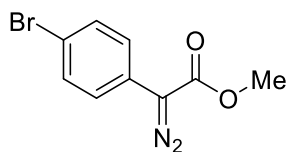

**methyl 2-(4-bromophenyl)-2-diazoacetate (1a);**  $^1\text{H NMR}$  (400 MHz,  $\text{CDCl}_3$ )  $\delta$  7.49 (d,  $J = 8.8$  Hz, 2H), 7.36 (d,  $J = 8.8$  Hz, 2H), 3.86 (s, 3H).

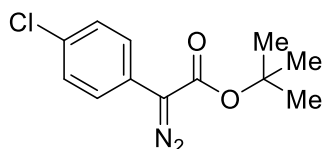

**tert-butyl 2-(4-chlorophenyl)-2-diazoacetate (1b);**  $^1\text{H NMR}$  (400 MHz,  $\text{CDCl}_3$ )  $\delta$  7.41 (d,  $J = 8.8$  Hz, 2H), 7.33 (d,  $J = 8.8$  Hz, 2H), 1.54 (s, 9H).

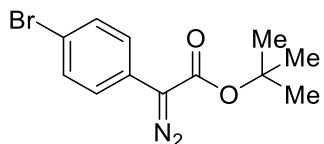

**tert-butyl 2-(4-bromophenyl)-2-diazoacetate (1c);**  $^1\text{H NMR}$  (400 MHz,  $\text{CDCl}_3$ )  $\delta$  7.47 (d,  $J = 8.8$  Hz, 2H), 7.35 (d,  $J = 8.8$  Hz, 2H), 1.54 (s, 9H).

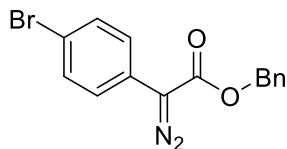

**benzyl 2-(4-bromophenyl)-2-diazoacetate (1d);**  $^1\text{H NMR}$  (400 MHz,  $\text{CDCl}_3$ )  $\delta$  7.49 (d,  $J = 8.7$  Hz, 2H), 7.41 – 7.37 (m, 5H), 7.37 – 7.33 (m, 2H), 5.31 (s, 2H).

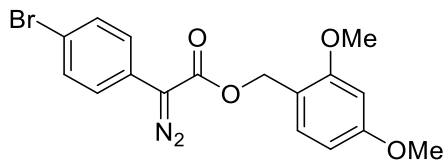

**2,4-dimethoxybenzyl 2-(4-bromophenyl)-2-diazoacetate (1e);**  $^1\text{H NMR}$  (400 MHz,  $\text{CDCl}_3$ )  $\delta$  7.48 (d,  $J = 8.8$  Hz, 2H), 7.36 (d,  $J = 8.8$  Hz, 2H), 7.28 – 7.26 (m, 1H), 6.49 – 6.47 (m, 1H), 6.47 – 6.45 (m, 1H), 5.28 (s, 2H), 3.83 (s, 3H), 3.82 (s, 3H).

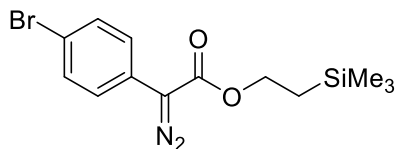

**2-(trimethylsilyl)ethyl 2-(4-bromophenyl)-2-diazoacetate (1f);**  $^1\text{H NMR}$  (400 MHz,  $\text{CDCl}_3$ )  $\delta$  7.49 (d,  $J = 8.8$  Hz, 2H), 7.37 (d,  $J = 8.8$  Hz, 2H), 4.37 (t,  $J = 8.4$  Hz, 2H),

1.07 (t,  $J = 8.4$  Hz, 2H), 0.06 (s, 9H).

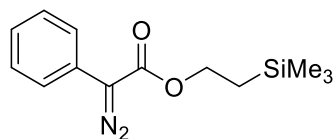

**2-(trimethylsilyl)ethyl 2-diazo-2-phenylacetate (1g);**  $^1\text{H}$  NMR (400 MHz,  $\text{CDCl}_3$ )  $\delta$  7.49 (d,  $J = 7.8$  Hz, 2H), 7.38 (t,  $J = 7.8$  Hz, 2H), 7.18 (t,  $J = 7.8$  Hz, 1H), 4.38 (t,  $J = 8.5$  Hz, 2H), 1.08 (t,  $J = 8.5$  Hz, 2H), 0.06 (s, 9H).

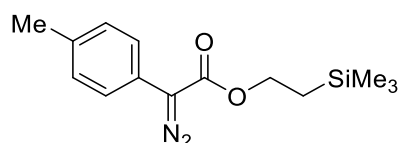

**2-(trimethylsilyl)ethyl 2-diazo-2-(*p*-tolyl)acetate (1h);**  $^1\text{H}$  NMR (400 MHz,  $\text{CDCl}_3$ )  $\delta$  7.37 (d,  $J = 8.3$  Hz, 2H), 7.19 (d,  $J = 8.3$  Hz, 2H), 4.36 (t,  $J = 8.5$  Hz, 2H), 2.34 (s, 3H), 1.07 (t,  $J = 8.5$  Hz, 2H), 0.06 (s, 9H).

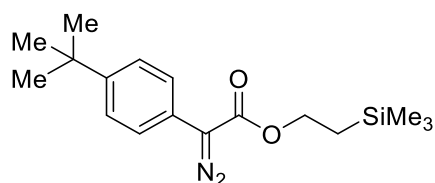

**2-(trimethylsilyl)ethyl 2-diazo-2-(4-(*tert*-butyl)phenyl)-2-diazoacetate (1i);**  $^1\text{H}$  NMR (400 MHz,  $\text{CDCl}_3$ )  $\delta$  7.41 (s, 4H), 4.37 (t,  $J = 8.5$  Hz, 2H), 1.32 (s, 9H), 1.08 (t,  $J = 8.5$  Hz, 2H), 0.06 (s, 9H).

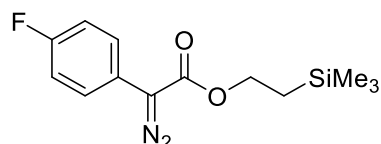

**2-(trimethylsilyl)ethyl 2-diazo-2-(4-fluorophenyl)acetate (1j);**  $^1\text{H}$  NMR (400 MHz,  $\text{CDCl}_3$ )  $\delta$  7.45 (dd,  $J = 8.8, 5.2$  Hz, 2H), 7.08 (t,  $J = 8.8$  Hz, 2H), 4.37 (t,  $J = 8.5$  Hz, 2H), 1.07 (t,  $J = 8.5$  Hz, 2H), 0.06 (s, 9H).

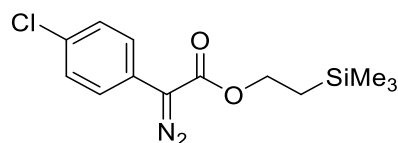

**2-(trimethylsilyl)ethyl 2-diazo-2-(4-chlorophenyl)-2-diazoacetate (1k);**  $^1\text{H}$  NMR (400 MHz,  $\text{CDCl}_3$ )  $\delta$  7.43 (d,  $J = 8.5$  Hz, 2H), 7.34 (d,  $J = 8.5$  Hz, 2H), 4.36 (t,  $J = 8.4$  Hz, 2H), 1.07 (t,  $J = 8.4$  Hz, 2H), 0.06 (s, 9H).

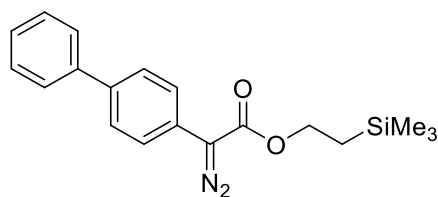

**2-(trimethylsilyl)ethyl 2-([1,1'-biphenyl]-4-yl)-2-diazoacetate (1l);**  $^1\text{H}$  NMR (400 MHz,  $\text{CDCl}_3$ )  $\delta$  7.63 (dd,  $J = 7.6, 1.4$  Hz, 2H), 7.60 (d,  $J = 8.5$  Hz, 2H), 7.56 (d,  $J = 8.5$  Hz, 2H), 7.44 (t,  $J = 7.6$  Hz, 2H), 7.35 (tt,  $J = 7.6, 1.4$  Hz, 1H), 4.40 (t,  $J = 8.5$  Hz, 2H), 1.10 (t,  $J = 8.5$  Hz, 2H), 0.08 (s, 9H).

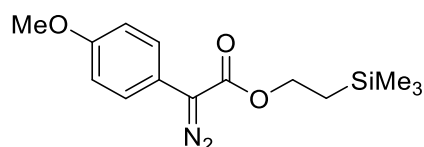

**2-(trimethylsilyl)ethyl 2-diazo-2-(4-methoxyphenyl)acetate (1m);**  $^1\text{H}$  NMR (400 MHz,  $\text{CDCl}_3$ )  $\delta$  7.39 (d,  $J = 8.8$  Hz, 2H), 6.94 (d,  $J = 8.8$  Hz, 2H), 4.36 (t,  $J = 8.4$  Hz, 2H), 3.81 (s, 3H), 1.07 (t,  $J = 8.4$  Hz, 2H), 0.06 (s, 9H).

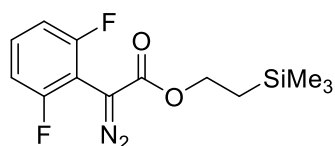

**2-(trimethylsilyl)ethyl 2-diazo-2-(2,6-difluorophenyl)acetate (1n);**  $^1\text{H}$  NMR (400 MHz,  $\text{CDCl}_3$ )  $\delta$  7.33 (tt,  $J = 8.4, 6.3$  Hz, 1H), 6.97 (t,  $J = 8.4$  Hz, 2H), 4.34 (t,  $J = 8.5$  Hz, 2H), 1.04 (t,  $J = 8.5$  Hz, 2H), 0.03 (s, 9H).

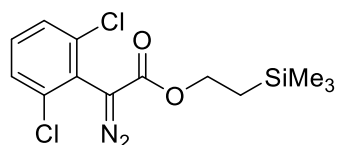

**2-(trimethylsilyl)ethyl 2-diazo-2-(2,6-dichlorophenyl)acetate (1o);**  $^1\text{H}$  NMR (400 MHz,  $\text{CDCl}_3$ )  $\delta$  7.41 (d,  $J = 8.0$  Hz, 2H), 7.29 (t,  $J = 8.0$  Hz, 1H), 4.34 (s, 2H), 1.04 (s, 2H), 0.09 – -0.06 (m, 9H).

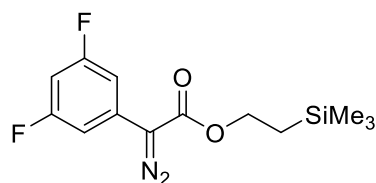

**2-(trimethylsilyl)ethyl 2-diazo-2-(3,5-difluorophenyl)acetate (1p);**  $^1\text{H}$  NMR (400 MHz,  $\text{CDCl}_3$ )  $\delta$  7.11 – 7.02 (m, 2H), 6.60 (tt,  $J = 8.8, 2.2$  Hz, 1H), 4.38 (t,  $J = 8.5$  Hz, 2H), 1.08 (t,  $J = 8.5$  Hz, 2H), 0.07 (s, 9H).

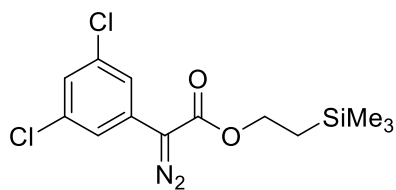

**2-(trimethylsilyl)ethyl 2-diazo-2-(3,5-dichlorophenyl)acetate (1q);**  $^1\text{H}$  NMR (400 MHz,  $\text{CDCl}_3$ )  $\delta$  7.41 (d,  $J = 1.8$  Hz, 2H), 7.14 (t,  $J = 1.8$  Hz, 1H), 4.38 (t,  $J = 8.5$  Hz, 2H), 1.08 (t,  $J = 8.5$  Hz, 2H), 0.07 (s, 9H).

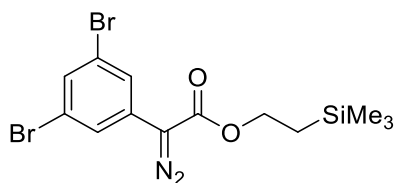

**2-(trimethylsilyl)ethyl 2-diazo-2-(3,5-dibromophenyl)acetate (1r);**  $^1\text{H}$  NMR (400 MHz,  $\text{CDCl}_3$ )  $\delta$  7.60 (d,  $J = 1.7$  Hz, 2H), 7.44 (t,  $J = 1.7$  Hz, 1H), 4.38 (t,  $J = 8.4$  Hz, 2H), 1.08 (t,  $J = 8.4$  Hz, 2H), 0.07 (s, 9H).

**Characterization data of 2a and 2k:**

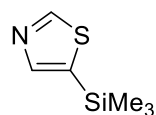

**5-(trimethylsilyl)thiazole (2a);**  $^1\text{H}$  NMR (400 MHz,  $\text{CDCl}_3$ )  $\delta$  9.00 (s, 1H), 7.94 (s, 1H), 0.34 (s, 9H).

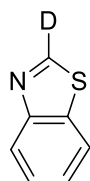

**benzo[*d*]thiazole-2-*d* (2k);**  $^1\text{H}$  NMR (400 MHz,  $\text{CDCl}_3$ )  $\delta$  8.15 (ddd,  $J = 8.3, 1.2, 0.5$  Hz, 1H), 7.97 (ddd,  $J = 8.3, 1.2, 0.5$  Hz, 1H), 7.53 (ddd,  $J = 8.3, 7.2, 1.2$  Hz, 1H), 7.45 (ddd,  $J = 8.3, 7.2, 1.2$  Hz, 1H).

**Characterization data of 3a-3f, 4a-4i, 5a-5l:**

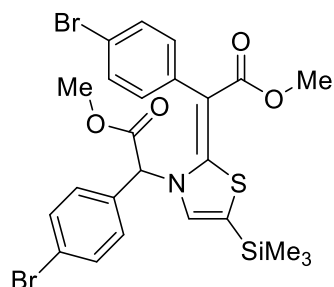

**methyl (*Z*)-2-(4-bromophenyl)-2-(3-(1-(4-bromophenyl)-2-methoxy-2-oxoethyl)-5-(trimethylsilyl)thiazol-2(*3H*)-ylidene)acetate (3a)**, 101 mg (Yellow solid, 83% yield); TLC  $R_f$  = 0.38 (Hexanes/EtOAc = 10:1);  $^1\text{H}$  NMR (400 MHz,  $\text{CDCl}_3$ )  $\delta$  7.45 – 7.41 (m, 4H), 7.11 (s, 2H), 6.78 (d,  $J$  = 8.4 Hz, 2H), 6.35 (s, 1H), 5.58 (s, 1H), 3.66 (s, 6H), 0.18 (s, 9H);  $^{13}\text{C}$  NMR (100 MHz,  $\text{CDCl}_3$ )  $\delta$  168.8, 168.5, 165.3, 136.4, 133.9, 133.5, 133.3, 132.3, 132.0, 129.1, 123.4, 121.0, 119.1, 92.0, 64.1, 52.9, 51.5, -0.9; HRMS (ESI $^+$ )  $m/z$ :  $[\text{M} + \text{H}]^+$  calcd for  $\text{C}_{24}\text{H}_{26}\text{Br}_2\text{NO}_4\text{SSi}^+$ , 611.9693; found, 611.9699.

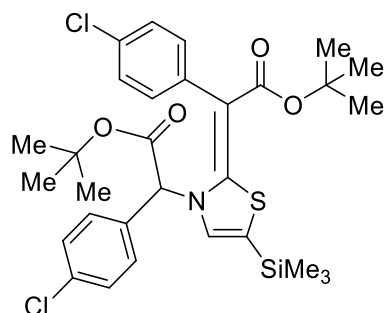

**tert-butyl (*Z*)-2-(3-(2-(*tert*-butoxy)-1-(4-chlorophenyl)-2-oxoethyl)-5-(trimethylsilyl)thiazol-2(*3H*)-ylidene)-2-(4-chlorophenyl)acetate (3b)**, 85 mg (Yellow liquid, 70% yield); TLC  $R_f$  = 0.45 (Hexanes/EtOAc = 20:1);  $^1\text{H}$  NMR (400 MHz,  $\text{DMSO}-d_6$ )  $\delta$  7.44 (d,  $J$  = 8.4 Hz, 2H), 7.38 (d,  $J$  = 8.4 Hz, 2H), 7.35 – 7.10 (m, 2H), 7.07 (d,  $J$  = 8.4 Hz, 2H), 6.51 (s, 1H), 5.35 (s, 1H), 1.34 (s, 9H), 1.30 (s, 9H), 0.15 (s, 9H); (This compound decomposes in  $\text{CDCl}_3$  and the  $^{13}\text{C}$  NMR spectra could not be collected successfully.); HRMS (ESI $^+$ )  $m/z$ :  $[\text{M} + \text{H}]^+$  calcd for  $\text{C}_{30}\text{H}_{38}\text{Cl}_2\text{NO}_4\text{SSi}^+$ , 606.1663; found, 606.1672.

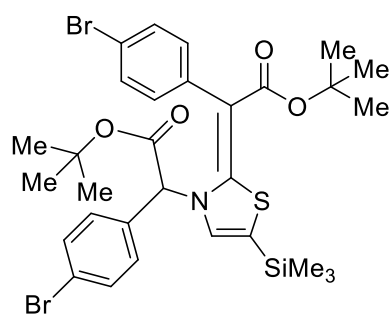

**tert-butyl (*Z*)-2-(4-bromophenyl)-2-(3-(1-(4-bromophenyl)-2-(*tert*-butoxy)-2-oxoethyl)-5-(trimethylsilyl)thiazol-2(*3H*)-ylidene)acetate (3c)**, 115 mg (Yellow solid, 83% yield); TLC  $R_f$  = 0.38 (Hexanes/EtOAc = 20:1);  $^1\text{H}$  NMR (400 MHz,  $\text{CDCl}_3$ )  $\delta$

7.42 (d,  $J = 8.5$  Hz, 2H), 7.39 (d,  $J = 8.5$  Hz, 2H), 7.11 (d,  $J = 8.5$  Hz, 2H), 6.83 (d,  $J = 8.5$  Hz, 2H), 6.41 (s, 1H), 5.44 (s, 1H), 1.41 (s, 9H), 1.39 (s, 9H), 0.18 (s, 9H);  $^{13}\text{C}$  NMR (100 MHz,  $\text{CDCl}_3$ )  $\delta$  167.8, 167.4, 163.7, 137.3, 134.8, 133.2, 132.7, 132.1, 131.8, 129.1, 122.9, 120.3, 117.9, 93.9, 83.6, 79.2, 63.9, 28.7, 27.9, -0.8; HRMS (ESI $^+$ )  $m/z$ :  $[\text{M} + \text{H}]^+$  calcd for  $\text{C}_{30}\text{H}_{38}\text{Br}_2\text{NO}_4\text{SSi}^+$ , 696.0632; found, 696.0643.

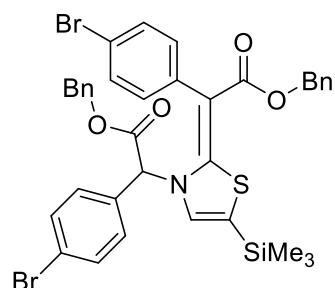

**benzyl (Z)-2-(3-(2-(benzyloxy)-1-(4-bromophenyl)-2-oxoethyl)-5-(trimethylsilyl)thiazol-2(3H)-ylidene)-2-(4-bromophenyl)acetate (3d)**, 122 mg (Yellow liquid, 80% yield); TLC  $R_f = 0.46$  (Hexanes/EtOAc = 10:1);  $^1\text{H}$  NMR (400 MHz,  $\text{CDCl}_3$ )  $\delta$  7.39 – 7.33 (m, 6H), 7.30 – 7.23 (m, 6H), 7.18 (d,  $J = 7.7$  Hz, 2H), 7.08 (s, 2H), 6.70 (d,  $J = 8.4$  Hz, 2H), 6.32 (s, 1H), 5.64 (s, 1H), 5.22 (d,  $J = 13.0$  Hz, 1H), 5.18 (d,  $J = 12.0$  Hz, 1H), 5.10 (d,  $J = 13.0$  Hz, 1H), 5.03 (d,  $J = 12.0$  Hz, 1H), 0.17 (s, 9H);  $^{13}\text{C}$  NMR (100 MHz,  $\text{CDCl}_3$ )  $\delta$  168.2, 167.6, 165.0, 137.6, 136.1, 134.5, 133.8, 133.5, 132.4, 132.2, 132.0, 129.2, 129.0, 128.9, 128.8, 128.4, 127.5, 127.3, 123.3, 121.0, 118.9, 91.9, 68.0, 65.3, 63.8, -0.9; HRMS (ESI $^+$ )  $m/z$ :  $[\text{M} + \text{H}]^+$  calcd for  $\text{C}_{36}\text{H}_{34}\text{Br}_2\text{NO}_4\text{SSi}^+$ , 764.0319; found, 764.0341.

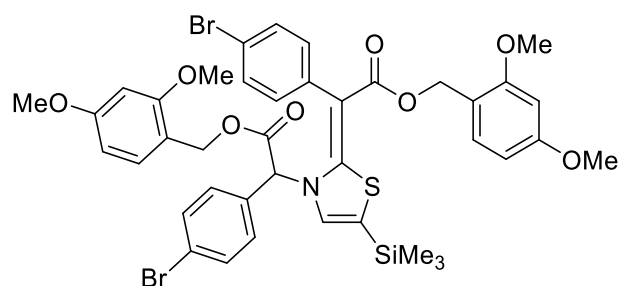

**2,4-dimethoxybenzyl (Z)-2-(4-bromophenyl)-2-(3-(1-(4-bromophenyl)-2-((2,4-dimethoxybenzyl)oxy)-2-oxoethyl)-5-(trimethylsilyl)thiazol-2(3H)-ylidene)acetate (3e)**, 122 mg (Yellow liquid, 69% yield); TLC  $R_f = 0.31$  (Hexanes/EtOAc = 5:1);  $^1\text{H}$  NMR (400 MHz,  $\text{CDCl}_3$ )  $\delta$  7.36 (d,  $J = 8.3$  Hz, 2H), 7.31 (d,  $J = 8.3$  Hz, 2H), 7.21 (d,  $J = 8.3$  Hz, 1H), 7.08 (s, 2H), 6.99 (d,  $J = 8.3$  Hz, 1H), 6.76 (d,  $J = 8.3$  Hz, 2H), 6.46 (dd,  $J = 8.3, 2.3$  Hz, 1H), 6.43 (d,  $J = 2.3$  Hz, 1H), 6.40 – 6.36 (m, 2H), 6.31 (s, 1H), 5.58 (s, 1H), 5.30 (d,  $J = 11.6$  Hz, 1H), 5.18 (d,  $J = 13.0$  Hz, 1H), 5.06 (d,  $J = 13.0$  Hz, 1H), 4.89 (d,  $J = 11.6$  Hz, 1H), 3.81 (s, 3H), 3.78 (s, 3H), 3.77 (s, 3H), 3.73 (s, 3H), 0.16 (s, 9H);  $^{13}\text{C}$  NMR (100 MHz,  $\text{CDCl}_3$ )  $\delta$  168.3, 167.9, 164.9, 161.9, 160.5, 159.1, 158.4, 136.3, 134.3, 133.6, 132.7, 132.4, 132.0, 131.7, 129.5, 129.3, 123.0, 120.7, 118.6, 118.5, 115.3, 104.2, 103.8, 98.6, 98.4, 92.2, 64.0, 63.5, 61.1, 55.5, 55.5, 55.5, 55.4, -0.9; HRMS (ESI $^+$ )  $m/z$ :  $[\text{M} + \text{H}]^+$  calcd for  $\text{C}_{40}\text{H}_{42}\text{Br}_2\text{NO}_8\text{SSi}^+$ , 884.0742; found, 884.0765.

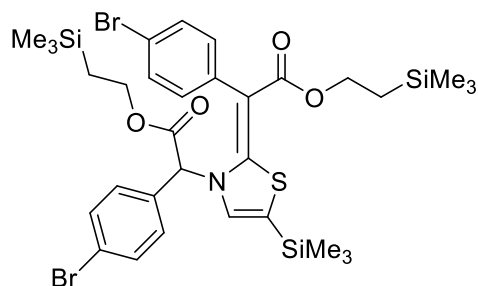

**2-(trimethylsilyl)ethyl (Z)-2-(4-bromophenyl)-2-(3-(1-(4-bromophenyl)-2-oxo-2-(2-(trimethylsilyl)ethoxy)ethyl)-5-(trimethylsilyl)thiazol-2(3H)-ylidene)acetate (3f)**, 146 mg (Yellow solid, 93% yield); TLC  $R_f$  = 0.50 (Hexanes/EtOAc = 20:1);  $^1\text{H}$  NMR (400 MHz, Chloroform-*d*)  $\delta$  7.42 (d,  $J$  = 8.5 Hz, 2H), 7.39 (d,  $J$  = 8.5 Hz, 2H), 7.11 (s, 2H), 6.80 (d,  $J$  = 8.5 Hz, 2H), 6.38 (s, 1H), 5.54 (s, 1H), 4.26 – 4.07 (m, 4H), 0.96 – 0.89 (m, 4H), 0.17 (s, 9H), 0.02 (s, 9H), -0.06 (s, 9H);  $^{13}\text{C}$  NMR (100 MHz,  $\text{CDCl}_3$ )  $\delta$  168.5, 168.3, 164.9, 136.6, 134.3, 133.3, 132.5, 132.2, 131.9, 129.1, 123.1, 120.7, 118.8, 92.4, 64.8, 64.1, 62.1, 17.7, 17.3, -0.9, -1.4, -1.5; HRMS (ESI $^+$ )  $m/z$ : [ $M + \text{H}$ ] $^+$  calcd for  $\text{C}_{32}\text{H}_{46}\text{Br}_2\text{NO}_4\text{SSi}_3^+$ , 784.0797; found, 784.0815.

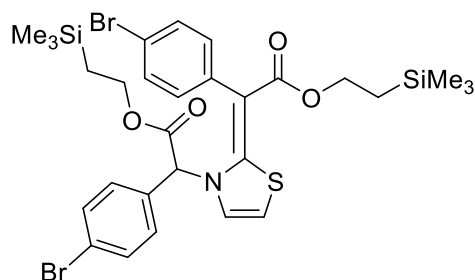

**2-(trimethylsilyl)ethyl (Z)-2-(4-bromophenyl)-2-(3-(1-(4-bromophenyl)-2-oxo-2-(2-(trimethylsilyl)ethoxy)ethyl)thiazol-2(3H)-ylidene)acetate (4a)**, 114 mg (Yellow liquid, 80% yield); TLC  $R_f$  = 0.31 (Hexanes/EtOAc = 10:1);  $^1\text{H}$  NMR (400 MHz,  $\text{CDCl}_3$ )  $\delta$  7.47 – 7.38 (m, 4H), 7.13 (s, 2H), 6.82 (d,  $J$  = 8.4 Hz, 2H), 6.45 (d,  $J$  = 4.7 Hz, 1H), 6.28 (d,  $J$  = 4.7 Hz, 1H), 5.55 (s, 1H), 4.27 – 4.07 (m, 4H), 0.95 – 0.88 (m, 4H), 0.02 (s, 9H), -0.06 (s, 9H);  $^{13}\text{C}$  NMR (100 MHz,  $\text{CDCl}_3$ )  $\delta$  168.4, 168.3, 162.5, 136.4, 134.3, 133.7, 132.4, 132.0, 129.3, 127.8, 123.3, 120.8, 107.4, 92.6, 64.9, 64.3, 62.1, 17.6, 17.3, -1.4, -1.5; HRMS (ESI $^+$ )  $m/z$ : [ $M + \text{H}$ ] $^+$  calcd for  $\text{C}_{29}\text{H}_{38}\text{Br}_2\text{NO}_4\text{SSi}_2^+$ , 712.0401; found, 712.0417.

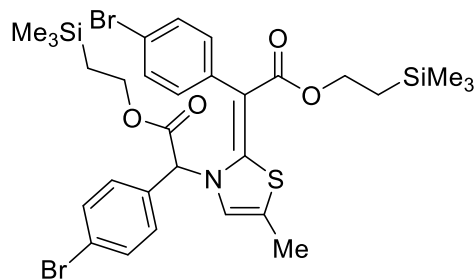

**2-(trimethylsilyl)ethyl (Z)-2-(4-bromophenyl)-2-(3-(1-(4-bromophenyl)-2-oxo-2-(2-(trimethylsilyl)ethoxy)ethyl)-5-methylthiazol-2(3H)-ylidene)acetate (4b)**, 109 mg (Yellow liquid, 75% yield); TLC  $R_f$  = 0.42 (Hexanes/EtOAc = 10:1);  $^1\text{H}$  NMR (400



MHz, CDCl<sub>3</sub>)  $\delta$  7.44 – 7.37 (m, 4H), 7.13 (s, 2H), 6.81 (d,  $J$  = 8.4 Hz, 2H), 6.12 (s, 1H), 5.49 (s, 1H), 4.25 – 4.06 (m, 4H), 2.06 (s, 3H), 0.95 – 0.88 (m, 4H), 0.02 (s, 9H), -0.06 (s, 9H); <sup>13</sup>C NMR (100 MHz, CDCl<sub>3</sub>)  $\delta$  168.6, 168.2, 163.1, 136.7, 134.4, 133.4, 132.3, 131.9, 129.3, 123.1, 123.1, 120.6, 119.3, 92.0, 64.7, 64.2, 62.0, 17.7, 17.3, 12.2, -1.4, -1.5; HRMS (ESI<sup>+</sup>)  $m/z$ : [M + H]<sup>+</sup> calcd for C<sub>30</sub>H<sub>40</sub>Br<sub>2</sub>NO<sub>4</sub>SSi<sub>2</sub><sup>+</sup>, 726.0558; found, 726.0602.

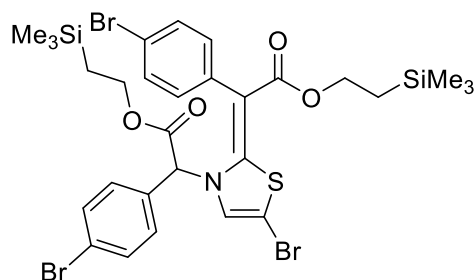

**2-(trimethylsilyl)ethyl (Z)-2-(5-bromo-2-(1-(4-bromophenyl)-2-oxo-2-(2-(trimethylsilyl)ethoxy)ethylidene)thiazol-3(2H)-yl)-2-(4-bromophenyl)acetate (4c)**, 136 mg (Yellow solid, 86% yield); TLC  $R_f$  = 0.46 (Hexanes/EtOAc = 20:1); <sup>1</sup>H NMR (400 MHz, CDCl<sub>3</sub>)  $\delta$  7.48 – 7.43 (m, 3H), 7.42 (d,  $J$  = 6.8 Hz, 1H), 7.22 (d,  $J$  = 6.8 Hz, 1H), 7.03 (d,  $J$  = 6.8 Hz, 1H), 6.82 (d,  $J$  = 8.4 Hz, 2H), 6.40 (s, 1H), 5.47 (s, 1H), 4.23 – 4.08 (m, 4H), 0.94 – 0.88 (m, 4H), 0.02 (s, 9H), -0.06 (s, 9H); <sup>13</sup>C NMR (100 MHz, CDCl<sub>3</sub>)  $\delta$  168.3, 168.1, 162.4, 135.6, 133.9, 133.7, 132.5, 132.1, 129.3, 127.4, 123.6, 121.3, 97.0, 94.2, 65.0, 64.3, 62.6, 17.6, 17.3, -1.5, -1.5; HRMS (ESI<sup>+</sup>)  $m/z$ : [M + Na]<sup>+</sup> calcd for C<sub>29</sub>H<sub>36</sub>Br<sub>3</sub>NNaO<sub>4</sub>SSi<sub>2</sub><sup>+</sup>, 811.9326; found, 811.9321.

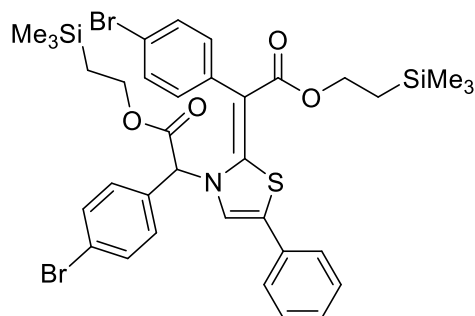

**2-(trimethylsilyl)ethyl (Z)-2-(4-bromophenyl)-2-(3-(1-(4-bromophenyl)-2-oxo-2-(2-(trimethylsilyl)ethoxy)ethyl)-5-phenylthiazol-2(3H)-ylidene)acetate (4d)**, 120 mg (Yellow solid, 76% yield); TLC  $R_f$  = 0.42 (Hexanes/EtOAc = 20:1); <sup>1</sup>H NMR (400 MHz, DMSO-*d*<sub>6</sub>)  $\delta$  7.56 (d,  $J$  = 8.5 Hz, 2H), 7.53 (d,  $J$  = 7.1 Hz, 2H), 7.48 – 7.31 (m, 5H), 7.28 (t,  $J$  = 7.1 Hz, 1H), 7.20 (s, 1H), 7.12 (d,  $J$  = 8.5 Hz, 2H), 7.03 (s, 1H), 5.48 (s, 1H), 4.17 – 4.07 (m, 4H), 0.89 – 0.82 (m, 4H), -0.05 (s, 9H), -0.08 (s, 9H); <sup>13</sup>C NMR (100 MHz, CDCl<sub>3</sub>)  $\delta$  168.4, 168.3, 161.8, 136.2, 134.2, 132.7, 132.5, 132.0, 131.1, 129.2, 128.9, 127.8, 125.3, 123.7, 123.4, 122.7, 121.0, 93.1, 65.0, 64.5, 62.3, 17.7, 17.3, -1.4, -1.5; HRMS (ESI<sup>+</sup>)  $m/z$ : [M + H]<sup>+</sup> calcd for C<sub>35</sub>H<sub>42</sub>Br<sub>2</sub>NO<sub>4</sub>SSi<sub>2</sub><sup>+</sup>, 788.0714; found, 788.0720.

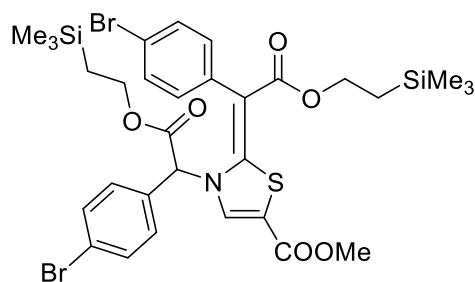

**methyl (Z)-3-(1-(4-bromophenyl)-2-oxo-2-(2-(trimethylsilyl)ethoxy)ethyl)-2-(1-(4-bromophenyl)-2-oxo-2-(2-(trimethylsilyl)ethoxy)ethylidene)-2,3-dihydrothiazole-5-carboxylate (4e)**, 146 mg (Yellow solid, 95% yield); TLC  $R_f$  = 0.29 (Hexanes/EtOAc = 10:1);  $^1\text{H}$  NMR (400 MHz,  $\text{CDCl}_3$ )  $\delta$  7.50 – 7.41 (m, 4H), 7.23 (dd,  $J$  = 8.3, 2.3 Hz, 1H), 7.21 (s, 1H), 7.01 (dd,  $J$  = 8.3, 2.3 Hz, 1H), 6.83 (d,  $J$  = 8.3 Hz, 2H), 5.51 (s, 1H), 4.24 – 4.08 (m, 4H), 3.77 (s, 3H), 0.94 – 0.88 (m, 4H), 0.02 (s, 9H), -0.06 (s, 9H);  $^{13}\text{C}$  NMR (100 MHz,  $\text{CDCl}_3$ )  $\delta$  168.1, 167.8, 161.7, 161.0, 136.2, 135.2, 133.9, 133.5, 132.7, 132.2, 132.1, 129.3, 123.8, 121.6, 113.9, 95.6, 65.2, 64.3, 62.7, 52.2, 17.6, 17.3, -1.5, -1.5; HRMS (ESI $^+$ )  $m/z$ :  $[\text{M} + \text{Na}]^+$  calcd for  $\text{C}_{31}\text{H}_{39}\text{Br}_2\text{NNaO}_6\text{SSi}_2^+$ , 792.0276; found, 792.0287.

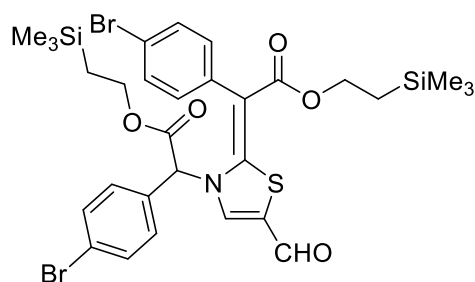

**2-(trimethylsilyl)ethyl (Z)-2-(4-bromophenyl)-2-(3-(1-(4-bromophenyl)-2-oxo-2-(2-(trimethylsilyl)ethoxy)ethyl)-5-formylthiazol-2(3H)-ylidene)acetate (4f)**, 38 mg (Yellow solid, 26% yield); TLC  $R_f$  = 0.54 (Hexanes/EtOAc = 5:1);  $^1\text{H}$  NMR (400 MHz,  $\text{DMSO}-d_6$ )  $\delta$  9.61 (s, 1H), 7.82 (s, 1H), 7.62 (d,  $J$  = 8.2 Hz, 2H), 7.58 (dd,  $J$  = 8.2, 1.8 Hz, 1H), 7.55 (dd,  $J$  = 8.2, 1.8 Hz, 1H), 7.48 (dd,  $J$  = 8.2, 1.8 Hz, 1H), 7.11 (d,  $J$  = 8.2 Hz, 2H), 7.03 (dd,  $J$  = 8.2, 1.8 Hz, 1H), 5.49 (s, 1H), 4.18 – 4.07 (m, 4H), 0.88 – 0.78 (m, 4H), -0.06 (s, 9H), -0.10 (s, 9H);  $^{13}\text{C}$  NMR (100 MHz,  $\text{CDCl}_3$ )  $\delta$  180.7, 167.9, 167.9, 159.6, 141.5, 134.9, 133.8, 133.4, 132.9, 132.6, 132.3, 132.3, 129.3, 124.8, 124.1, 122.0, 97.5, 65.5, 64.5, 63.1, 17.6, 17.3, -1.5, -1.5; HRMS (ESI $^+$ )  $m/z$ :  $[\text{M} + \text{Na}]^+$  calcd for  $\text{C}_{30}\text{H}_{37}\text{Br}_2\text{NNaO}_5\text{SSi}_2^+$ , 762.0170; found, 762.0185.

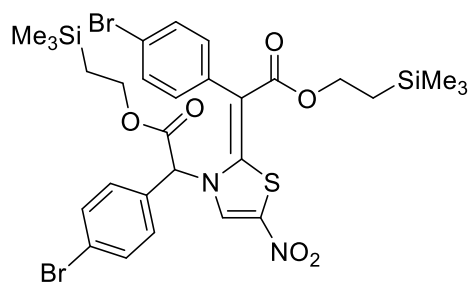

**2-(trimethylsilyl)ethyl (Z)-2-(4-bromophenyl)-2-(3-(1-(4-bromophenyl)-2-oxo-2-**

**(2-(trimethylsilyl)ethoxy)ethyl)-5-nitrothiazol-2(3*H*)-ylidene)acetate (4g)**, 104 mg (Orange solid, 69% yield); TLC  $R_f$  = 0.54 (Hexanes/EtOAc = 10:1);  $^1\text{H NMR}$  (400 MHz,  $\text{CDCl}_3$ )  $\delta$  7.55 (dd,  $J$  = 8.2, 2.1 Hz, 1H), 7.54 (s, 1H), 7.51 (d,  $J$  = 8.2 Hz, 2H), 7.47 (dd,  $J$  = 8.2, 2.1 Hz, 1H), 7.23 (dd,  $J$  = 8.2, 2.1 Hz, 1H), 7.01 (dd,  $J$  = 8.2, 2.1 Hz, 1H), 6.86 (d,  $J$  = 8.2 Hz, 2H), 5.50 (s, 1H), 4.25 – 4.07 (m, 4H), 0.95 – 0.86 (m, 4H), 0.02 (s, 9H), -0.05 (s, 9H);  $^{13}\text{C NMR}$  (100 MHz,  $\text{CDCl}_3$ )  $\delta$  168.0, 167.4, 157.6, 134.7, 134.4, 133.8, 133.4, 133.1, 132.6, 132.6, 132.5, 132.5, 129.5, 124.6, 122.5, 99.0, 65.7, 64.8, 63.6, 17.6, 17.4, -1.5, -1.5; HRMS (ESI $^+$ )  $m/z$ :  $[\text{M} + \text{Na}]^+$  calcd for  $\text{C}_{29}\text{H}_{36}\text{Br}_2\text{N}_2\text{NaO}_6\text{SSi}_2^+$ , 779.0072; found, 779.0086.

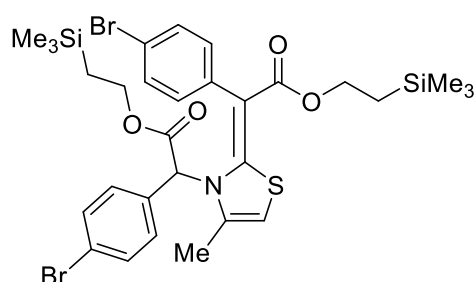

**2-(trimethylsilyl)ethyl (Z)-2-(4-bromophenyl)-2-(3-(1-(4-bromophenyl)-2-oxo-2-(2-(trimethylsilyl)ethoxy)ethyl)-4-methylthiazol-2(3*H*)-ylidene)acetate (4h)**, 74 mg (Yellow liquid, 51% yield); TLC  $R_f$  = 0.54 (Hexanes/EtOAc = 10:1);  $^1\text{H NMR}$  (400 MHz,  $\text{CDCl}_3$ )  $\delta$  8.14 (d,  $J$  = 8.7 Hz, 1H), 7.47 (d,  $J$  = 8.7 Hz, 2H), 7.41 (d,  $J$  = 8.7 Hz, 2H), 7.29 – 7.23 (m, 3H), 7.06 (d,  $J$  = 1.9 Hz, 1H), 6.11 (s, 1H), 4.45 – 4.40 (m, 2H), 4.33 – 4.28 (m, 2H), 1.65 (s, 3H), 1.22 – 1.16 (m, 2H), 0.98 – 0.88 (m, 2H), 0.07 (s, 9H), -0.02 (s, 9H);  $^{13}\text{C NMR}$  (100 MHz,  $\text{CDCl}_3$ )  $\delta$  169.2, 167.3, 161.2, 141.5, 138.4, 132.0, 131.6, 130.0, 129.5, 129.2, 127.8, 125.1, 122.8, 116.3, 106.5, 89.0, 72.7, 66.0, 62.5, 18.1, 17.2, 16.6, -1.3, -1.5; HRMS (ESI $^+$ )  $m/z$ :  $[\text{M} + \text{H}]^+$  calcd for  $\text{C}_{30}\text{H}_{40}\text{Br}_2\text{NO}_4\text{SSi}_2^+$ , 726.0558; found, 726.0626.

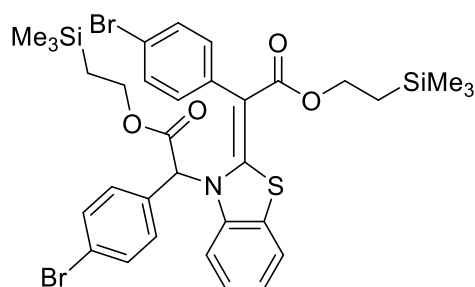

**2-(trimethylsilyl)ethyl (Z)-2-(4-bromophenyl)-2-(3-(1-(4-bromophenyl)-2-oxo-2-(2-(trimethylsilyl)ethoxy)ethyl)benzo[d]thiazol-2(3*H*)-ylidene)acetate (4i)**, 128 mg (Yellow solid, 84% yield); TLC  $R_f$  = 0.44 (Hexanes/EtOAc = 20:1);  $^1\text{H NMR}$  (400 MHz,  $\text{CDCl}_3$ )  $\delta$  7.46 (d,  $J$  = 7.8 Hz, 1H), 7.38 (d,  $J$  = 8.0 Hz, 1H), 7.33 (d,  $J$  = 8.5 Hz, 2H), 7.14 (d,  $J$  = 7.8 Hz, 1H), 7.07 – 6.97 (m, 3H), 6.88 (d,  $J$  = 7.8 Hz, 1H), 6.77 (d,  $J$  = 8.5 Hz, 2H), 6.69 (d,  $J$  = 8.0 Hz, 1H), 5.83 (s, 1H), 4.23 (t,  $J$  = 8.6 Hz, 2H), 4.09 (td,  $J$  = 11.2, 6.4 Hz, 1H), 3.96 (td,  $J$  = 11.2, 6.4 Hz, 1H), 0.92 (t,  $J$  = 8.6 Hz, 2H), 0.75 – 0.63 (m, 2H), -0.02 (s, 9H), -0.06 (s, 9H);  $^{13}\text{C NMR}$  (100 MHz,  $\text{CDCl}_3$ )  $\delta$  168.4, 167.8, 162.0, 140.2, 135.0, 133.6, 133.2, 132.0, 131.3, 129.2, 127.9, 125.4, 123.1, 122.3, 121.3, 121.2,

113.5, 97.0, 66.5, 64.9, 62.7, 17.6, 17.2, -1.5, -1.5; HRMS (ESI<sup>+</sup>) m/z: [M + Na]<sup>+</sup> calcd for C<sub>33</sub>H<sub>39</sub>Br<sub>2</sub>NNaO<sub>4</sub>SSi<sub>2</sub><sup>+</sup>, 784.0377; found, 784.0322.

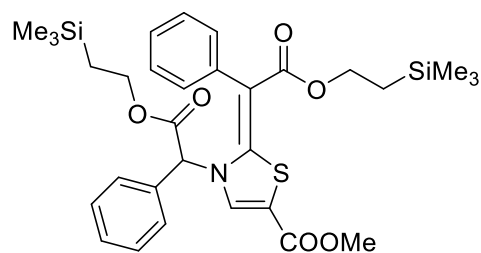

**methyl (Z)-3-(2-oxo-1-phenyl-2-(2-(trimethylsilyl)ethoxy)ethyl)-2-(2-oxo-1-phenyl-2-(2-(trimethylsilyl)ethoxy)ethylidene)-2,3-dihydrothiazole-5-carboxylate (5a)**, 109 mg (Yellow solid, 89% yield); TLC R<sub>f</sub> = 0.22 (Hexanes/EtOAc = 10:1); <sup>1</sup>H NMR (400 MHz, CDCl<sub>3</sub>) δ 7.38 (d, *J* = 8.0 Hz, 2H), 7.33 – 7.27 (m, 5H), 7.21 (s, 1H), 7.17 (d, *J* = 7.2 Hz, 1H), 6.99 – 6.95 (m, 2H), 5.54 (s, 1H), 4.23 – 4.07 (m, 4H), 3.75 (s, 3H), 0.94 – 0.84 (m, 4H), -0.01 (s, 9H), -0.08 (s, 9H); <sup>13</sup>C NMR (100 MHz, CDCl<sub>3</sub>) δ 168.7, 168.4, 162.1, 160.5, 136.8, 136.2, 134.6, 132.2, 131.4, 129.4, 129.4, 129.1, 129.0, 128.1, 127.6, 112.9, 97.1, 64.8, 64.7, 62.5, 52.1, 17.6, 17.3, -1.4, -1.5; HRMS (ESI<sup>+</sup>) m/z: [M + Na]<sup>+</sup> calcd for C<sub>31</sub>H<sub>41</sub>NNaO<sub>6</sub>SSi<sub>2</sub><sup>+</sup>, 634.2086; found, 634.2092.

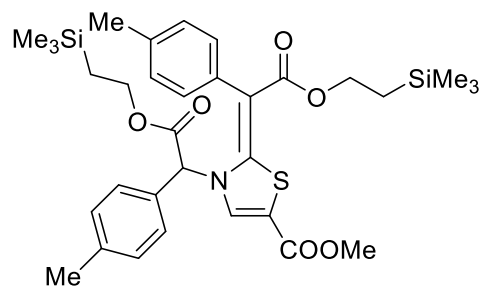

**methyl (Z)-3-(2-oxo-1-(*p*-tolyl)-2-(2-(trimethylsilyl)ethoxy)ethyl)-2-(2-oxo-1-(*p*-tolyl)-2-(2-(trimethylsilyl)ethoxy)ethylidene)-2,3-dihydrothiazole-5-carboxylate (5b)**, 99 mg (Yellow solid, 77% yield); TLC R<sub>f</sub> = 0.22 (Hexanes/EtOAc = 10:1); <sup>1</sup>H NMR (400 MHz, CDCl<sub>3</sub>) δ 7.32 (s, 1H), 7.30 – 7.26 (m, 2H), 7.19 – 7.15 (m, 3H), 7.09 (d, *J* = 8.0 Hz, 1H), 6.92 (d, *J* = 8.0 Hz, 2H), 5.63 (s, 1H), 4.29 – 4.12 (m, 4H), 3.80 (s, 3H), 2.39 (s, 3H), 2.37 (s, 3H), 1.00 – 0.89 (m, 4H), 0.05 (s, 9H), -0.01 (s, 9H); <sup>13</sup>C NMR (100 MHz, CDCl<sub>3</sub>) δ 168.8, 168.6, 162.1, 160.3, 139.4, 137.1, 137.0, 133.0, 131.9, 131.7, 131.1, 130.1, 129.8, 129.7, 128.0, 112.6, 96.8, 64.5, 64.3, 62.4, 52.0, 21.4, 21.2, 17.6, 17.3, -1.5, -1.6; HRMS (ESI<sup>+</sup>) m/z: [M + H]<sup>+</sup> calcd for C<sub>33</sub>H<sub>46</sub>NO<sub>6</sub>SSi<sub>2</sub><sup>+</sup>, 640.2579; found, 640.2582.

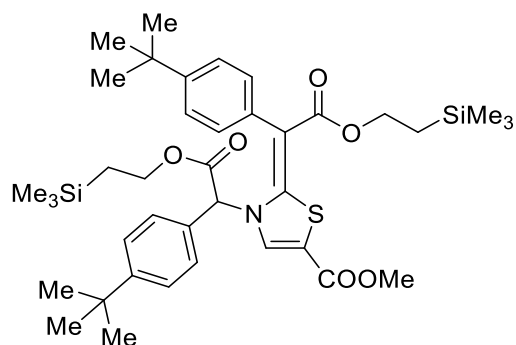

**methyl (Z)-3-(1-(4-(*tert*-butyl)phenyl)-2-oxo-2-(2-(trimethylsilyl)ethoxy)ethyl)-2-(1-(4-(*tert*-butyl)phenyl)-2-oxo-2-(2-(trimethylsilyl)ethoxy)ethylidene)-2,3-dihydrothiazole-5-carboxylate (5c)**, 90 mg (Yellow solid, 62% yield); TLC  $R_f$  = 0.26 (Hexanes/EtOAc = 10:1);  $^1\text{H}$  NMR (400 MHz,  $\text{CDCl}_3$ )  $\delta$  7.37 (d,  $J$  = 8.1 Hz, 1H), 7.33 – 7.28 (m, 4H), 7.26 – 7.23 (m, 1H), 7.09 (d,  $J$  = 8.1 Hz, 1H), 6.89 (d,  $J$  = 8.1 Hz, 2H), 5.55 (s, 1H), 4.27 – 4.19 (m, 3H), 4.09 – 4.01 (m, 1H), 3.76 (s, 3H), 1.31 (s, 9H), 1.28 (s, 9H), 0.97 – 0.86 (m, 4H), -0.02 (s, 9H), -0.10 (s, 9H);  $^{13}\text{C}$  NMR (100 MHz,  $\text{CDCl}_3$ )  $\delta$  168.9, 168.7, 162.2, 160.3, 152.3, 150.3, 137.2, 132.9, 131.7, 130.7, 127.8, 126.3, 125.9, 112.5, 96.8, 64.6, 64.1, 62.4, 52.0, 34.7, 34.6, 31.4, 31.3, 17.5, 17.4, -1.4, -1.5; HRMS (ESI $^+$ )  $m/z$ :  $[\text{M} + \text{Na}]^+$  calcd for  $\text{C}_{39}\text{H}_{57}\text{NNaO}_6\text{SSi}_2^+$ , 746.3338; found, 746.3345.

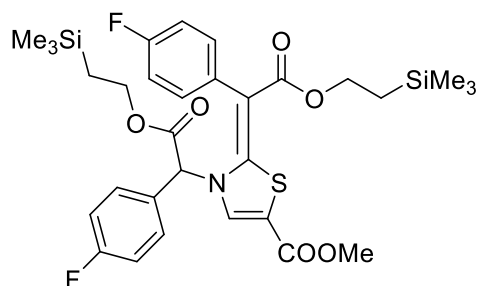

**methyl (Z)-3-(1-(4-fluorophenyl)-2-oxo-2-(2-(trimethylsilyl)ethoxy)ethyl)-2-(1-(4-fluorophenyl)-2-oxo-2-(2-(trimethylsilyl)ethoxy)ethylidene)-2,3-dihydrothiazole-5-carboxylate (5d)**, 106 mg (Yellow solid, 82% yield); TLC  $R_f$  = 0.22 (Hexanes/EtOAc = 10:1);  $^1\text{H}$  NMR (400 MHz,  $\text{CDCl}_3$ )  $\delta$  7.36 (td,  $J$  = 8.0, 5.5, 2.2 Hz, 1H), 7.32 (s, 1H), 7.18 (td,  $J$  = 8.0, 5.5, 2.2 Hz, 1H), 7.13 (td,  $J$  = 8.5, 2.6 Hz, 1H), 7.11 – 7.08 (m, 1H), 7.08 – 7.04 (m, 2H), 7.03 – 6.99 (m, 2H), 5.59 (s, 1H), 4.28 – 4.14 (m, 4H), 3.82 (s, 3H), 0.98 – 0.90 (m, 4H), 0.05 (s, 9H), -0.01 (s, 9H);  $^{13}\text{C}$  NMR (100 MHz,  $\text{CDCl}_3$ )  $\delta$  168.5, 168.2, 164.3, 163.4, 161.9, 161.8, 161.0, 160.8, 136.3, 133.8, 133.7, 133.0, 132.9, 132.1, 132.1, 130.3, 130.3, 129.9, 129.8, 116.7, 116.5, 116.1, 116.1, 115.9, 115.9, 113.5, 95.9, 65.1, 64.1, 62.7, 52.2, 17.6, 17.2, -1.5, -1.6 (there are more signals than the number of carbons in the molecular formula due to the coupling of F atoms); HRMS (ESI $^+$ )  $m/z$ :  $[\text{M} + \text{H}]^+$  calcd for  $\text{C}_{31}\text{H}_{40}\text{F}_2\text{NO}_6\text{SSi}_2^+$ , 648.2078; found, 648.1988.

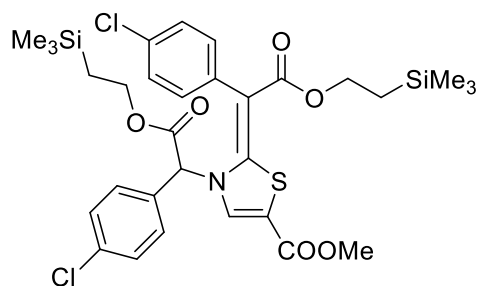

**methyl (Z)-3-(1-(4-chlorophenyl)-2-oxo-2-(2-(trimethylsilyl)ethoxy)ethyl)-2-(1-(4-chlorophenyl)-2-oxo-2-(2-(trimethylsilyl)ethoxy)ethylidene)-2,3-dihydrothiazole-5-carboxylate (5e)**, 124 mg (Yellow solid, 91% yield); TLC  $R_f$  = 0.33 (Hexanes/EtOAc = 10:1);  $^1\text{H}$  NMR (400 MHz,  $\text{CDCl}_3$ )  $\delta$  7.36 – 7.27 (m, 5H), 7.21 (s, 1H), 7.08 (dd,  $J$  = 8.3, 1.7 Hz, 1H), 6.90 (d,  $J$  = 8.3 Hz, 2H), 5.53 (s, 1H), 4.24 – 4.09 (m, 4H), 3.77 (s, 3H), 0.93 – 0.88 (m, 4H), 0.01 (s, 9H), -0.06 (s, 9H);  $^{13}\text{C}$  NMR (100 MHz,  $\text{CDCl}_3$ )  $\delta$  168.3, 167.9, 161.8, 161.0, 136.3, 135.7, 134.8, 133.6, 133.5, 133.0, 132.4, 129.8, 129.3, 129.2, 129.2, 113.9, 95.7, 65.2, 64.3, 62.7, 52.2, 17.6, 17.3, -1.4, -1.5; HRMS (ESI $^+$ )  $m/z$ :  $[\text{M} + \text{H}]^+$  calcd for  $\text{C}_{31}\text{H}_{40}\text{Cl}_2\text{NO}_6\text{SSi}_2^+$ , 680.1487; found, 680.1495.

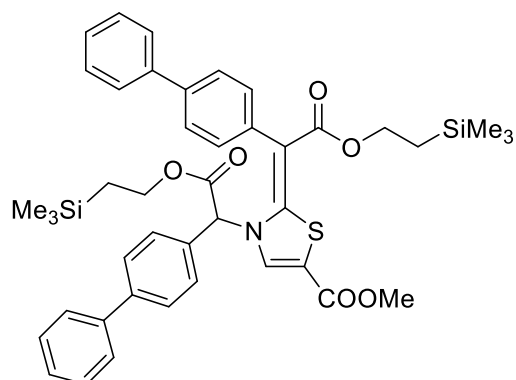

**methyl (Z)-3-(1-([1,1'-biphenyl]-4-yl)-2-oxo-2-(2-(trimethylsilyl)ethoxy)ethyl)-2-(1-([1,1'-biphenyl]-4-yl)-2-oxo-2-(2-(trimethylsilyl)ethoxy)ethylidene)-2,3-dihydrothiazole-5-carboxylate (5f)**, 110 mg (Yellow solid, 72% yield); TLC  $R_f$  = 0.56 (Hexanes/EtOAc = 5:1);  $^1\text{H}$  NMR (400 MHz,  $\text{CDCl}_3$ )  $\delta$  7.64 (d,  $J$  = 8.3 Hz, 1H), 7.62 (d,  $J$  = 7.9 Hz, 2H), 7.57 (d,  $J$  = 7.9 Hz, 1H), 7.53 (d,  $J$  = 7.9 Hz, 4H), 7.47 (d,  $J$  = 8.3 Hz, 1H), 7.45 – 7.41 (m, 4H), 7.39 – 7.32 (m, 3H), 7.25 (d,  $J$  = 7.9 Hz, 1H), 7.06 (d,  $J$  = 7.9 Hz, 2H), 5.74 (s, 1H), 4.32 – 4.21 (m, 2H), 4.19 – 4.11 (m, 1H), 4.07 – 3.98 (m, 1H), 3.77 (s, 3H), 0.94 (t,  $J$  = 8.4 Hz, 2H), 0.82 – 0.66 (m, 2H), -0.07 (s, 9H), -0.12 (s, 9H);  $^{13}\text{C}$  NMR (100 MHz,  $\text{CDCl}_3$ )  $\delta$  168.7, 168.5, 162.0, 160.8, 142.3, 140.5, 140.1, 139.9, 136.9, 135.3, 133.6, 132.7, 131.5, 129.0, 128.9, 128.3, 128.1, 128.0, 127.6, 127.2, 127.0, 113.3, 96.5, 64.9, 64.6, 62.6, 52.1, 17.6, 17.1, -1.4, -1.7; HRMS (ESI $^+$ )  $m/z$ :  $[\text{M} + \text{Na}]^+$  calcd for  $\text{C}_{43}\text{H}_{49}\text{NNaO}_6\text{SSi}_2^+$ , 786.2712; found, 786.2718.

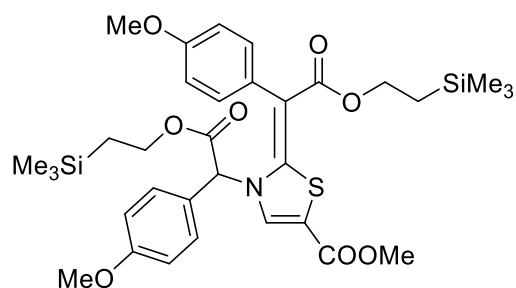

**methyl (Z)-3-(1-(4-methoxyphenyl)-2-oxo-2-(2-(trimethylsilyl)ethoxy)ethyl)-2-(1-(4-methoxyphenyl)-2-oxo-2-(2-(trimethylsilyl)ethoxy)ethylidene)-2,3-dihydrothiazole-5-carboxylate (5g)**, 74 mg (Yellow solid, 55% yield); TLC  $R_f$  = 0.56 (Hexanes/EtOAc = 5:1);  $^1\text{H}$  NMR (400 MHz,  $\text{CDCl}_3$ )  $\delta$  7.32 (s, 1H), 7.31 – 7.29 (m, 1H), 7.12 (d,  $J$  = 8.1 Hz, 1H), 7.00 – 6.95 (m, 3H), 6.92 – 6.89 (m, 1H), 6.88 (d,  $J$  = 8.1 Hz, 2H), 5.66 (s, 1H), 4.28 – 4.10 (m, 4H), 3.85 (s, 3H), 3.83 (s, 3H), 3.80 (s, 3H), 0.99 – 0.89 (m, 4H), 0.04 (s, 9H), -0.01 (s, 9H);  $^{13}\text{C}$  NMR (100 MHz,  $\text{CDCl}_3$ )  $\delta$  168.9, 168.7, 162.2, 160.3, 160.2, 158.9, 136.9, 133.1, 132.4, 129.5, 128.1, 126.5, 114.7, 114.7, 114.0, 112.5, 96.5, 64.6, 64.1, 62.4, 55.4, 55.2, 52.0, 17.6, 17.2, -1.4, -1.5; HRMS (ESI<sup>+</sup>)  $m/z$ :  $[\text{M} + \text{Na}]^+$  calcd for  $\text{C}_{33}\text{H}_{45}\text{NaO}_8\text{SSi}_2^+$ , 694.2297; found, 694.2309.

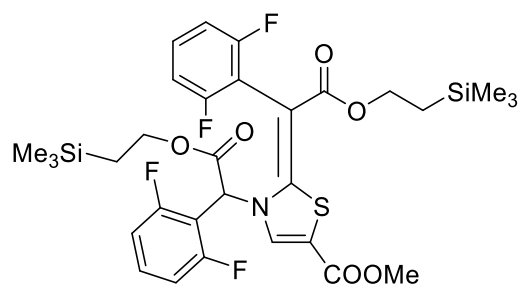

**methyl (Z)-3-(1-(2,6-difluorophenyl)-2-oxo-2-(2-(trimethylsilyl)ethoxy)ethyl)-2-(1-(2,6-difluorophenyl)-2-oxo-2-(2-(trimethylsilyl)ethoxy)ethylidene)-2,3-dihydrothiazole-5-carboxylate (5h)**, 119 mg (Yellow liquid, 87% yield); TLC  $R_f$  = 0.63 (Hexanes/EtOAc = 5:1);  $^1\text{H}$  NMR (400 MHz,  $\text{CDCl}_3$ )  $\delta$  7.41 – 7.33 (m, 1H), 7.33 – 7.27 (m, 1H), 7.22 (s, 1H), 7.00 – 6.90 (m, 3H), 6.87 (t,  $J$  = 8.0 Hz, 1H), 5.85 (s, 1H), 4.24 – 4.13 (m, 4H), 3.78 (s, 3H), 0.94 – 0.84 (m, 4H), -0.02 (s, 9H), -0.08 (s, 9H);  $^{13}\text{C}$  NMR (100 MHz,  $\text{CDCl}_3$ )  $\delta$  167.6, 166.7, 163.5, 163.5, 162.2, 162.2, 162.0, 162.0, 161.8, 161.6, 161.1, 161.0, 159.8, 159.7, 159.5, 159.4, 135.3, 132.6, 132.5, 132.4, 130.3, 130.2, 130.1, 114.2, 112.8, 112.6, 112.5, 112.5, 112.4, 112.3, 112.3, 111.9, 111.8, 111.6, 111.6, 111.5, 111.4, 111.3, 82.6, 65.5, 62.7, 54.3, 52.2, 17.4, 17.0, -1.5, -1.6 (there are more signals than the number of carbons in the molecular formula due to the coupling of F atoms); HRMS (ESI<sup>+</sup>)  $m/z$ :  $[\text{M} + \text{Na}]^+$  calcd for  $\text{C}_{31}\text{H}_{37}\text{F}_4\text{NNaO}_6\text{SSi}_2^+$ , 706.1709; found, 706.1709.

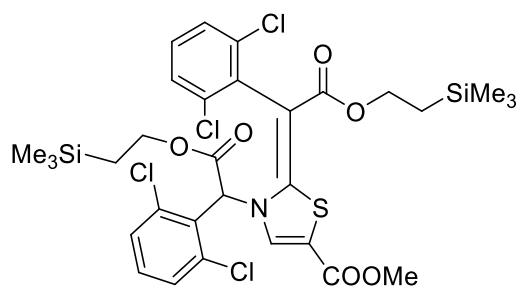

**methyl (Z)-3-(1-(2,6-dichlorophenyl)-2-oxo-2-(2-(trimethylsilyl)ethoxy)ethyl)-2-(1-(2,6-dichlorophenyl)-2-oxo-2-(2-(trimethylsilyl)ethoxy)ethylidene)-2,3-dihydrothiazole-5-carboxylate (5i)**, 114 mg (Yellow solid, 76% yield); TLC  $R_f$  = 0.56 (Hexanes/EtOAc = 5:1);  $^1\text{H}$  NMR (400 MHz,  $\text{CDCl}_3$ )  $\delta$  7.34 – 7.31 (m, 4H), 7.28 (s, 1H), 7.17 (t,  $J$  = 8.0 Hz, 1H), 7.13 (s, 1H), 5.77 (s, 1H), 4.22 – 4.17 (m, 2H), 4.11 – 4.02 (m, 2H), 3.78 (s, 3H), 0.91 – 0.82 (m, 4H), -0.04 (s, 9H), -0.07 – -0.09 (m, 9H);  $^{13}\text{C}$  NMR (100 MHz,  $\text{CDCl}_3$ )  $\delta$  167.3, 166.2, 163.8, 161.9, 139.9, 139.4, 136.9, 135.4, 133.6, 131.4, 130.5, 129.9, 129.6, 128.2, 128.2, 114.3, 93.5, 65.4, 63.1, 62.7, 52.2, 17.5, 16.7, -1.5, -1.5; HRMS (ESI<sup>+</sup>)  $m/z$ :  $[\text{M} + \text{Na}]^+$  calcd for  $\text{C}_{31}\text{H}_{37}\text{Cl}_4\text{NNaO}_6\text{SSi}_2^+$ , 772.0497; found, 772.0517.

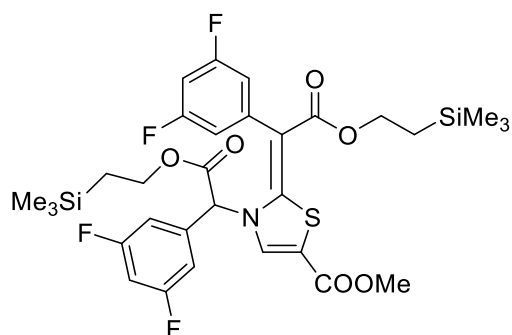

**methyl (Z)-3-(1-(3,5-difluorophenyl)-2-oxo-2-(2-(trimethylsilyl)ethoxy)ethyl)-2-(1-(3,5-difluorophenyl)-2-oxo-2-(2-(trimethylsilyl)ethoxy)ethylidene)-2,3-dihydrothiazole-5-carboxylate (5j)**, 85 mg (Yellow solid, 62% yield); TLC  $R_f$  = 0.42 (Hexanes/EtOAc = 10:1);  $^1\text{H}$  NMR (400 MHz,  $\text{CDCl}_3$ )  $\delta$  7.23 (s, 1H), 6.85 – 6.78 (m, 2H), 6.73 (tt,  $J$  = 8.9, 2.0 Hz, 2H), 6.52 (d,  $J$  = 5.6 Hz, 2H), 5.43 (s, 1H), 4.27 – 4.18 (m, 4H), 3.78 (s, 3H), 0.96 – 0.89 (m, 4H), 0.02 (s, 9H), -0.06 (s, 9H).  $^{13}\text{C}$  NMR (100 MHz,  $\text{CDCl}_3$ )  $\delta$  167.6, 167.2, 164.7, 164.6, 162.2, 162.1, 161.6, 161.3, 139.5, 139.4, 139.3, 137.7, 137.6, 137.5, 135.8, 115.2, 114.9, 114.6, 114.2, 113.9, 111.1, 111.0, 110.9, 110.8, 105.7, 105.4, 105.2, 103.6, 103.3, 103.1, 94.8, 65.9, 64.0, 63.0, 52.4, 17.6, 17.3, -1.5, -1.5 (there are more signals than the number of carbons in the molecular formula due to the coupling of F atoms); HRMS (ESI<sup>+</sup>)  $m/z$ :  $[\text{M} + \text{Na}]^+$  calcd for  $\text{C}_{31}\text{H}_{37}\text{F}_4\text{NNaO}_6\text{SSi}_2^+$ , 706.1709; found, 706.1718.



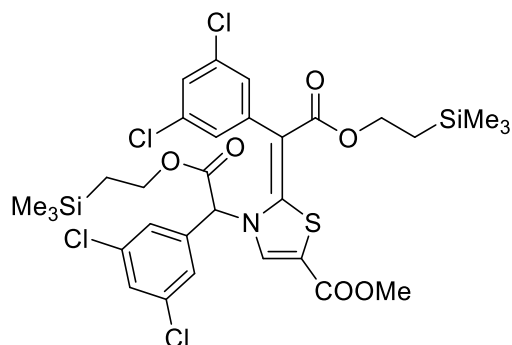

**methyl (Z)-3-(1-(3,5-dichlorophenyl)-2-oxo-2-(2-(trimethylsilyl)ethoxy)ethyl)-2-(1-(3,5-dichlorophenyl)-2-oxo-2-(2-(trimethylsilyl)ethoxy)ethylidene)-2,3-dihydrothiazole-5-carboxylate (5k)**, 42 mg (Yellow solid, 28% yield); TLC  $R_f$  = 0.45 (Hexanes/EtOAc = 10:1);  $^1\text{H}$  NMR (400 MHz,  $\text{CDCl}_3$ )  $\delta$  7.36 (t,  $J$  = 1.9 Hz, 1H), 7.29 (t,  $J$  = 1.9 Hz, 1H), 7.24 (s, 1H), 7.14 (s, 2H), 6.85 (d,  $J$  = 1.9 Hz, 2H), 5.41 (s, 1H), 4.29 – 4.19 (m, 4H), 3.81 (s, 3H), 0.99 – 0.90 (m, 4H), 0.02 (s, 9H), -0.05 (s, 9H);  $^{13}\text{C}$  NMR (100 MHz,  $\text{CDCl}_3$ )  $\delta$  167.6, 167.0, 161.6, 139.1, 137.0, 136.3, 135.6, 135.5, 130.3, 130.0, 129.6, 127.8, 126.2, 114.8, 94.7, 66.1, 64.0, 63.1, 52.4, 17.5, 17.4, -1.4, -1.5; HRMS (ESI<sup>+</sup>)  $m/z$ :  $[\text{M} + \text{Na}]^+$  calcd for  $\text{C}_{31}\text{H}_{37}\text{Cl}_4\text{NNaO}_6\text{SSi}_2^+$ , 772.0497; found, 772.0516.

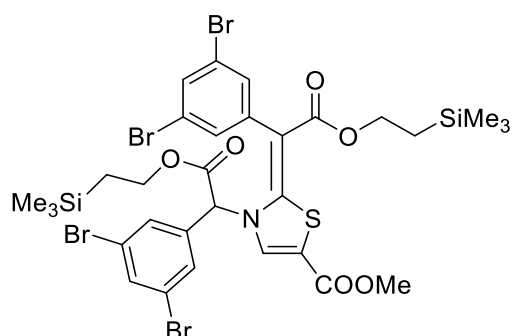

**methyl (Z)-3-(1-(3,5-dibromophenyl)-2-oxo-2-(2-(trimethylsilyl)ethoxy)ethyl)-2-(1-(3,5-dibromophenyl)-2-oxo-2-(2-(trimethylsilyl)ethoxy)ethylidene)-2,3-dihydrothiazole-5-carboxylate (5l)**, 108 mg (Yellow liquid, 58% yield); TLC  $R_f$  = 0.42 (Hexanes/EtOAc = 10:1);  $^1\text{H}$  NMR (400 MHz,  $\text{CDCl}_3$ )  $\delta$  7.67 (t,  $J$  = 1.7 Hz, 1H), 7.59 (t,  $J$  = 1.7 Hz, 1H), 7.38 (s, 1H), 7.30 (s, 1H), 7.23 (s, 1H), 7.04 (s, 2H), 5.39 (s, 1H), 4.32 – 4.18 (m, 4H), 3.81 (s, 3H), 1.02 – 0.89 (m, 4H), 0.02 (s, 9H), -0.05 (s, 9H);  $^{13}\text{C}$  NMR (100 MHz,  $\text{CDCl}_3$ )  $\delta$  167.6, 167.0, 161.6, 139.7, 137.3, 135.6, 135.6, 133.5, 133.3, 133.1, 129.5, 124.1, 123.5, 114.7, 94.6, 66.2, 63.8, 63.1, 52.4, 17.5, -1.4, -1.5 (one carbon signal is missing due to overlapping); HRMS (ESI<sup>+</sup>)  $m/z$ :  $[\text{M} + \text{Na}]^+$  calcd for  $\text{C}_{31}\text{H}_{37}\text{Br}_4\text{NNaO}_6\text{SSi}_2^+$ , 949.8465; found, 949.8471.

Copies of  $^1\text{H}$  NMR spectra of 1a-1r, 2a and 2k, 3a-3f, 4a-4i, 5a-5l:

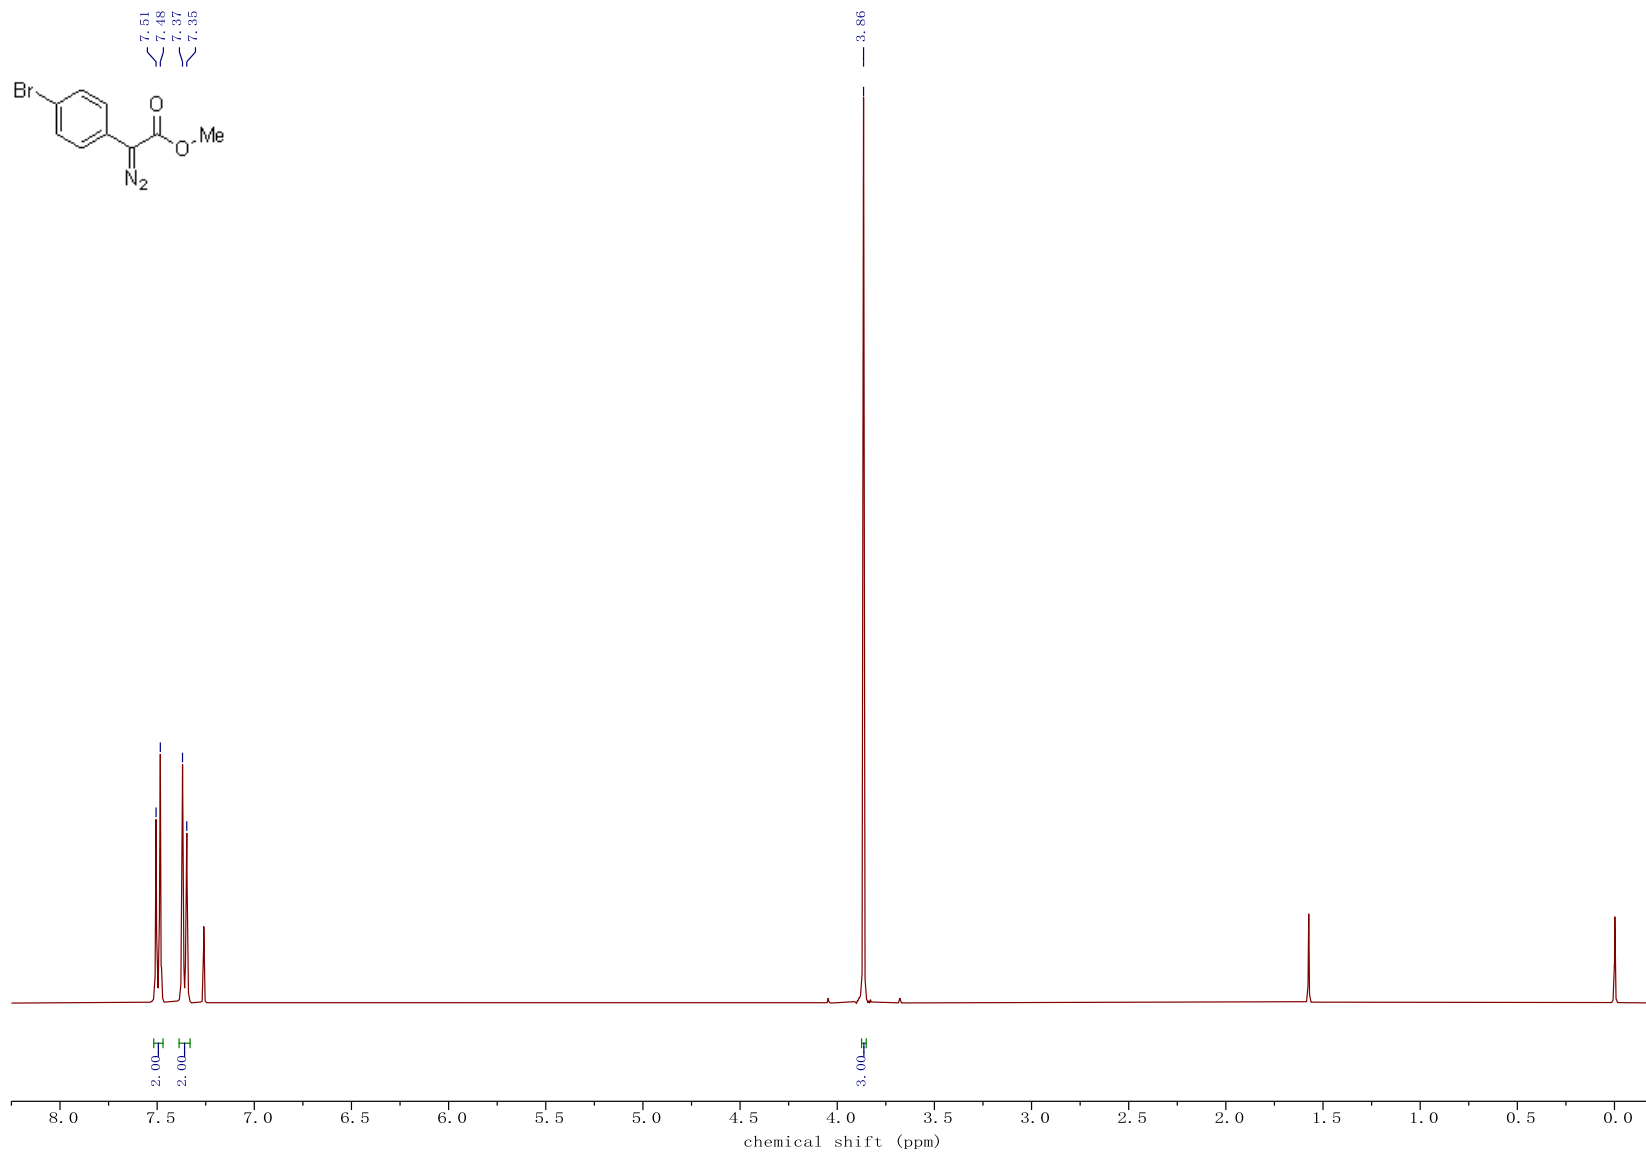

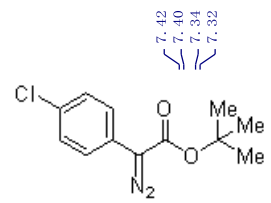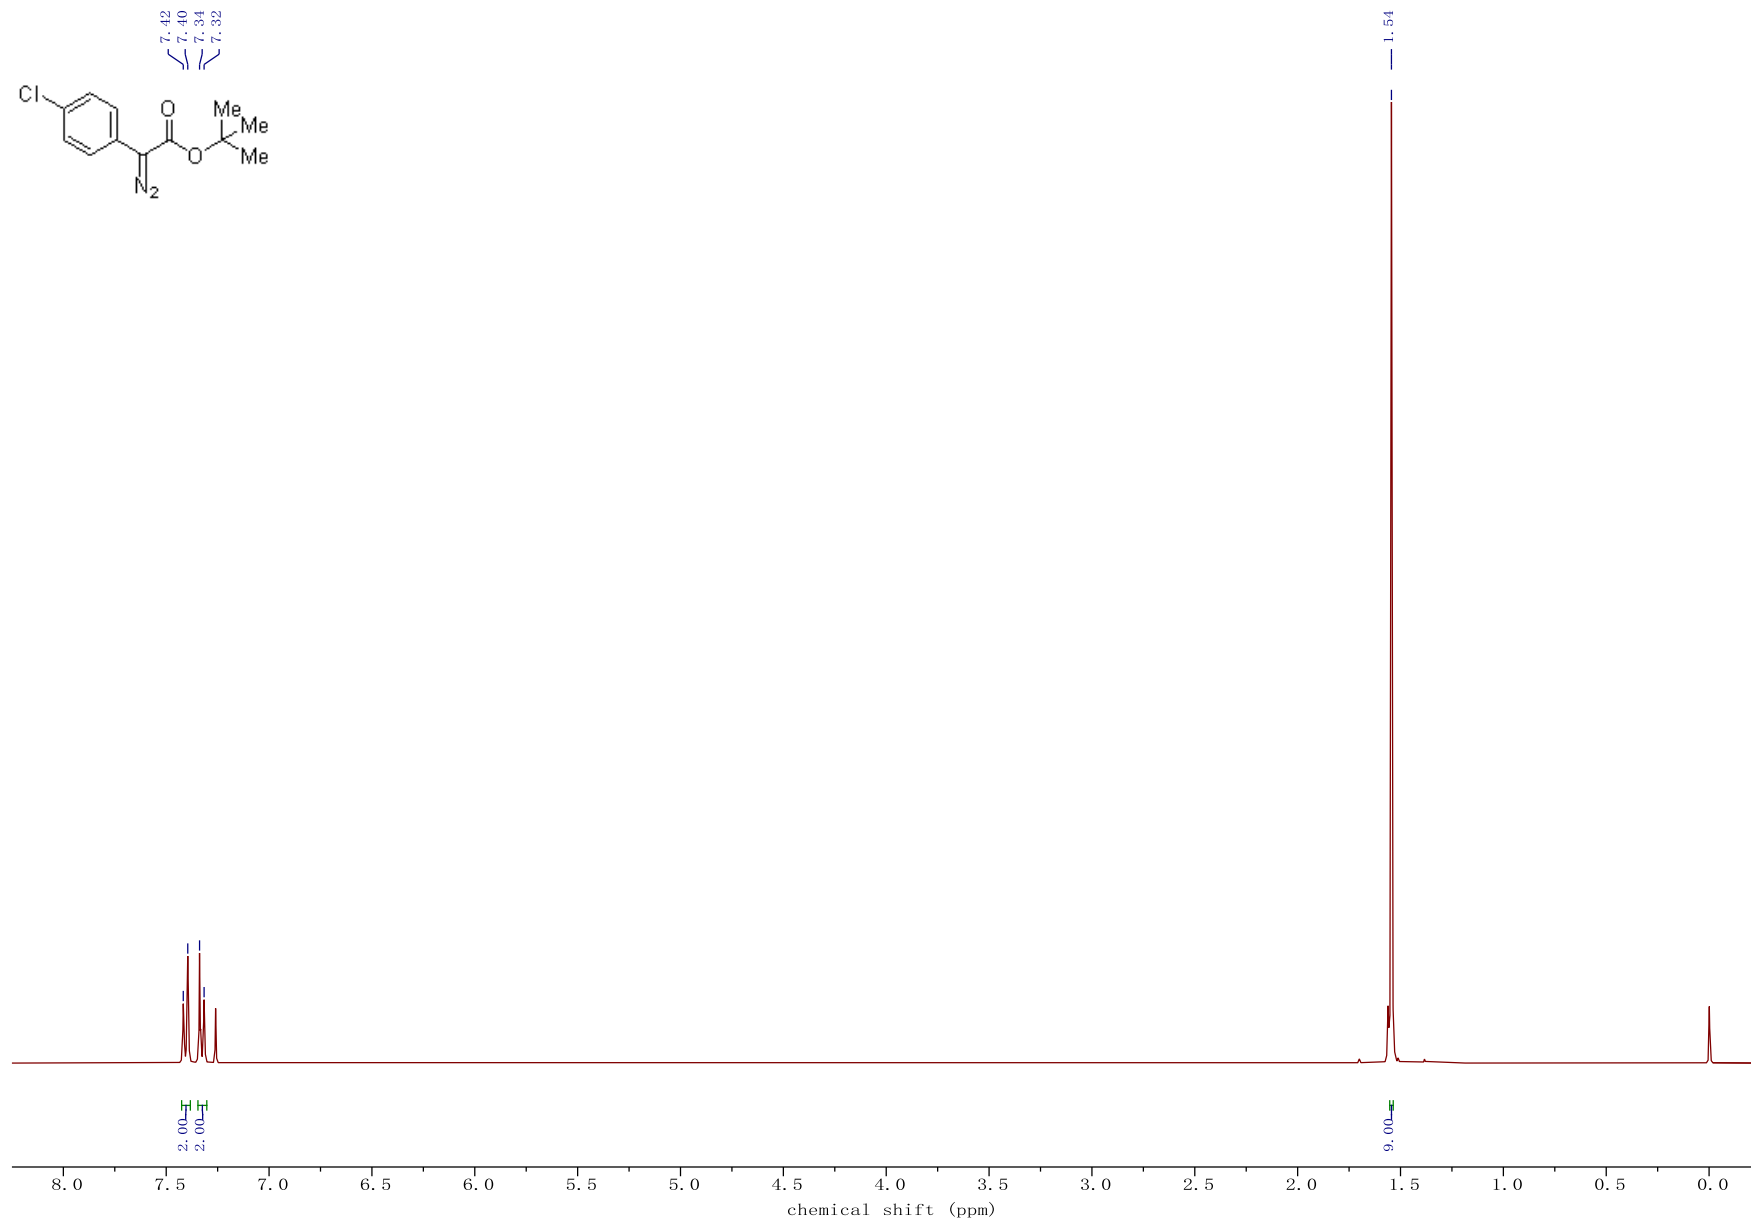

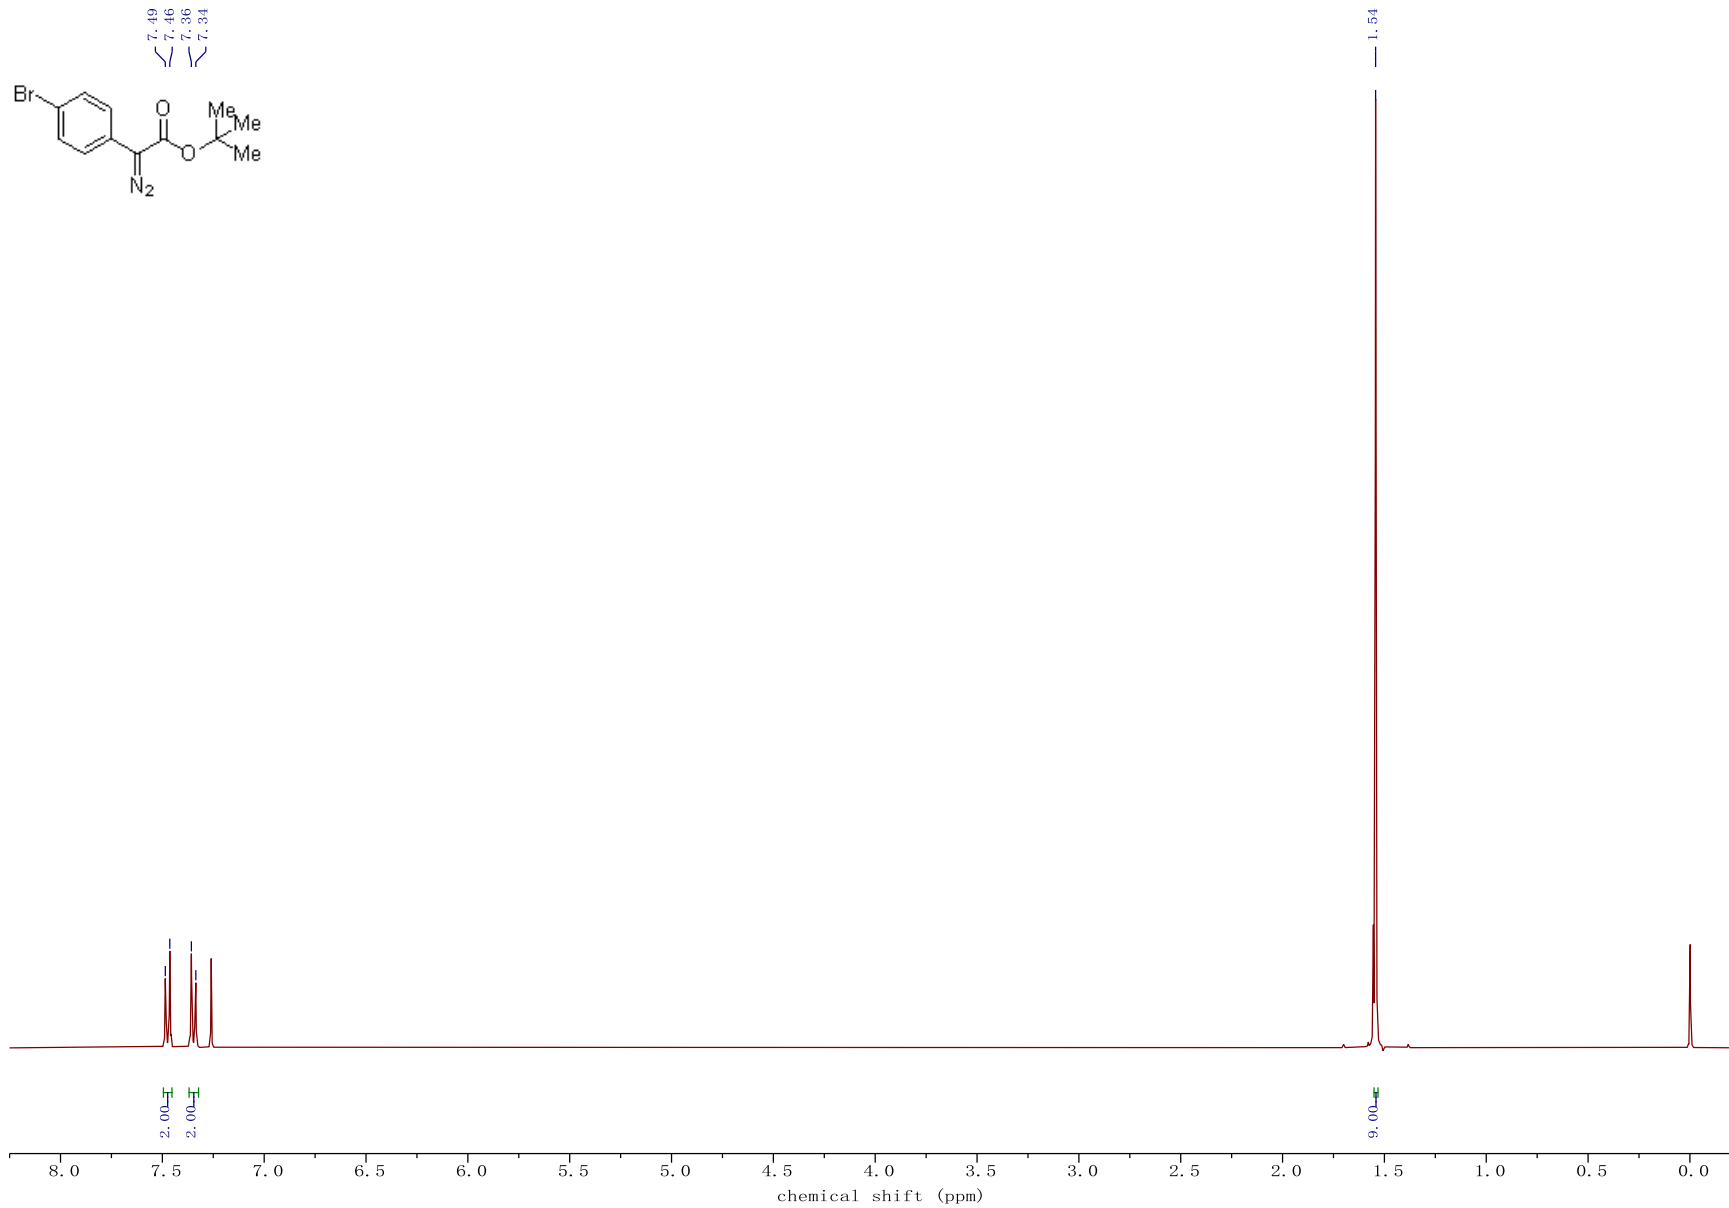

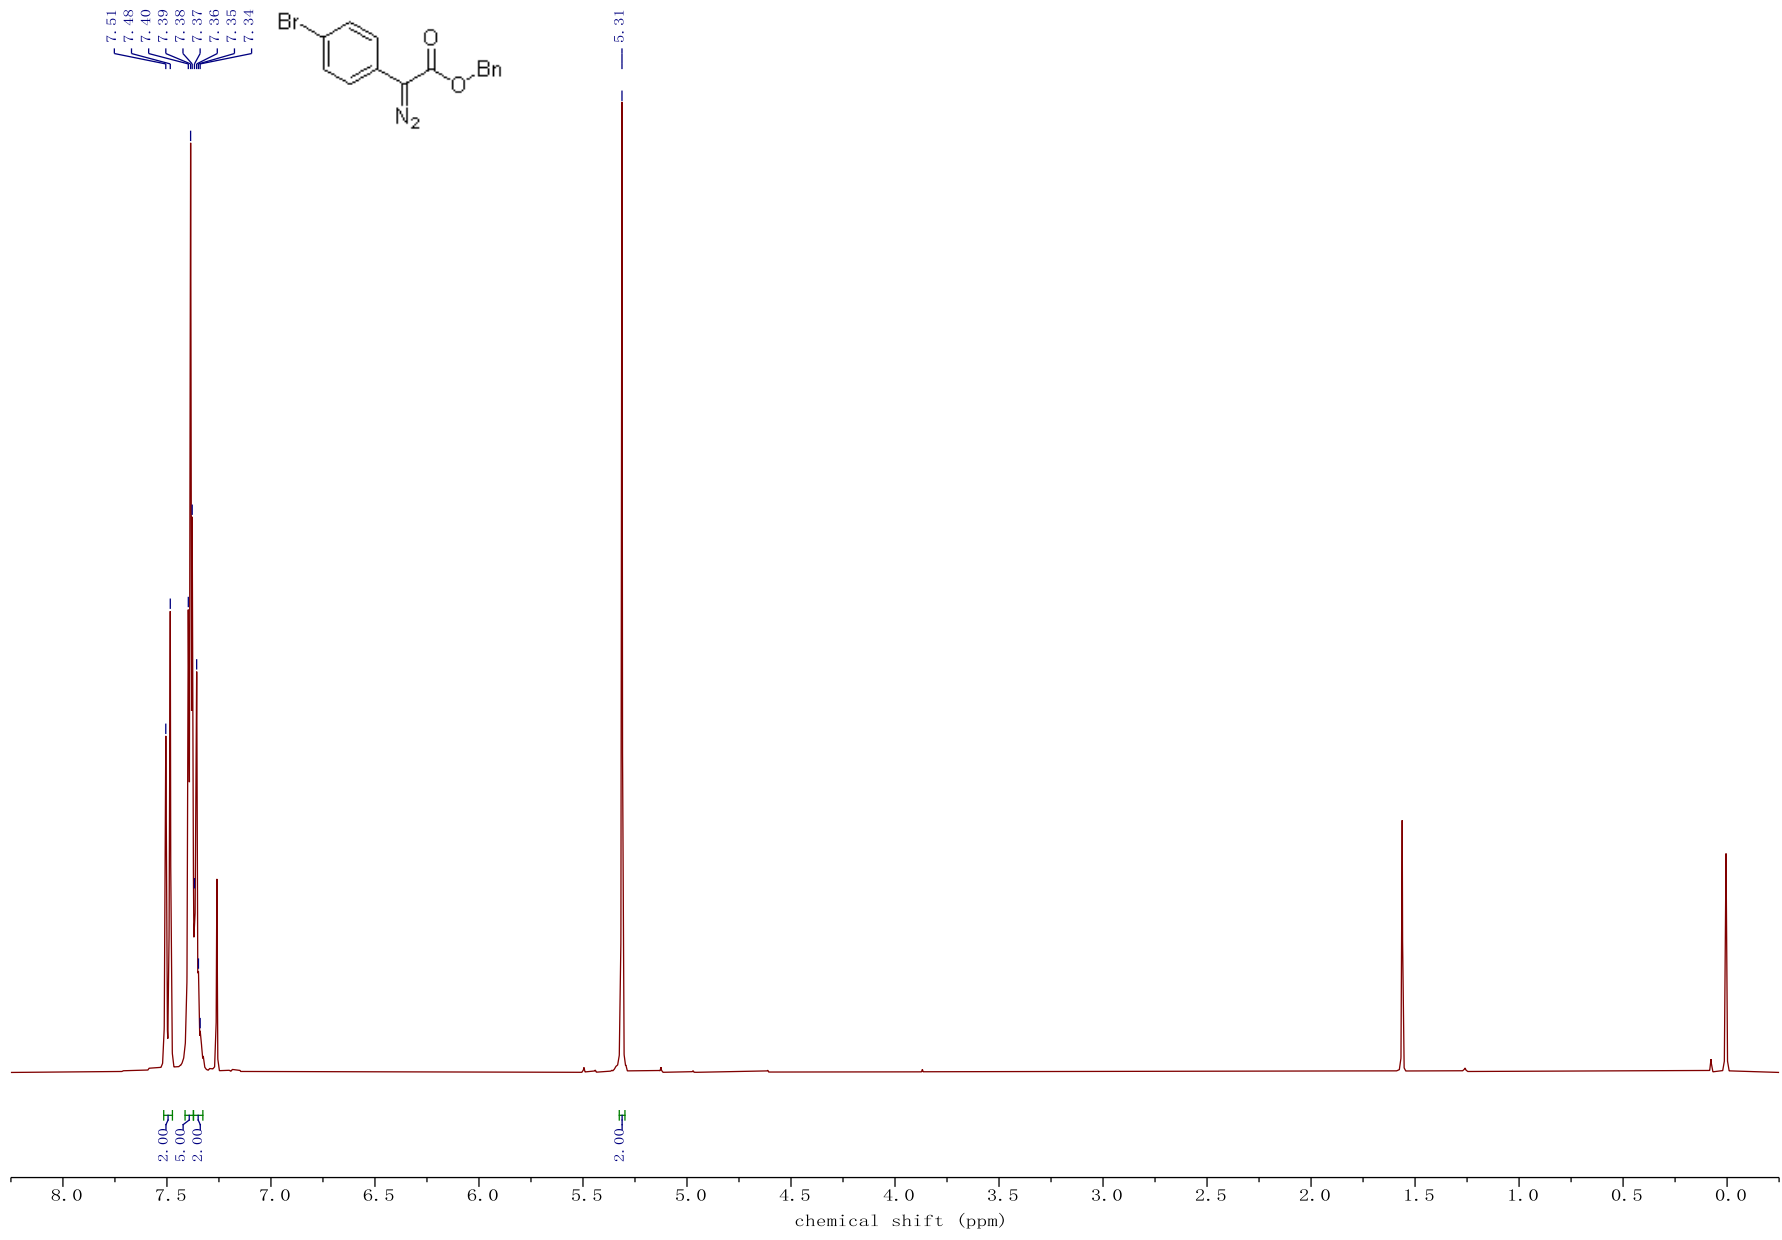

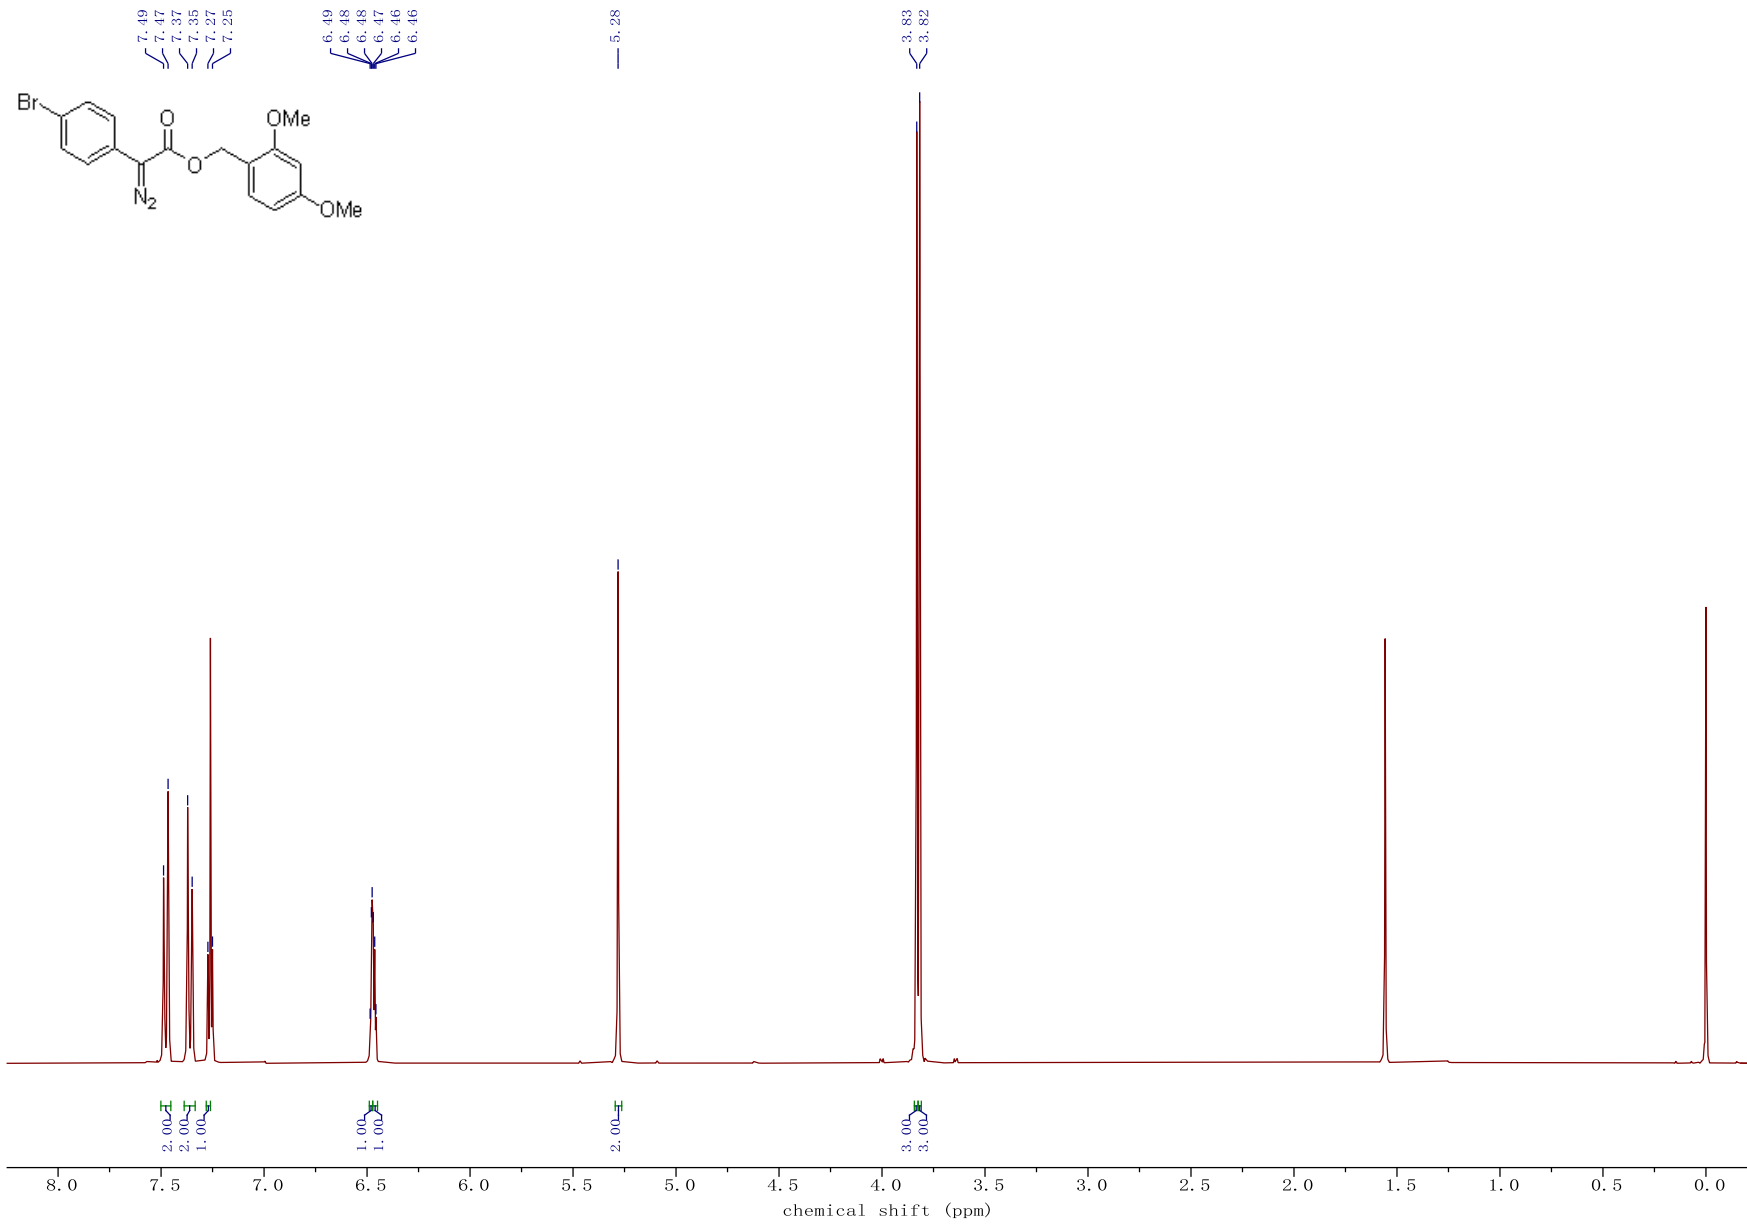

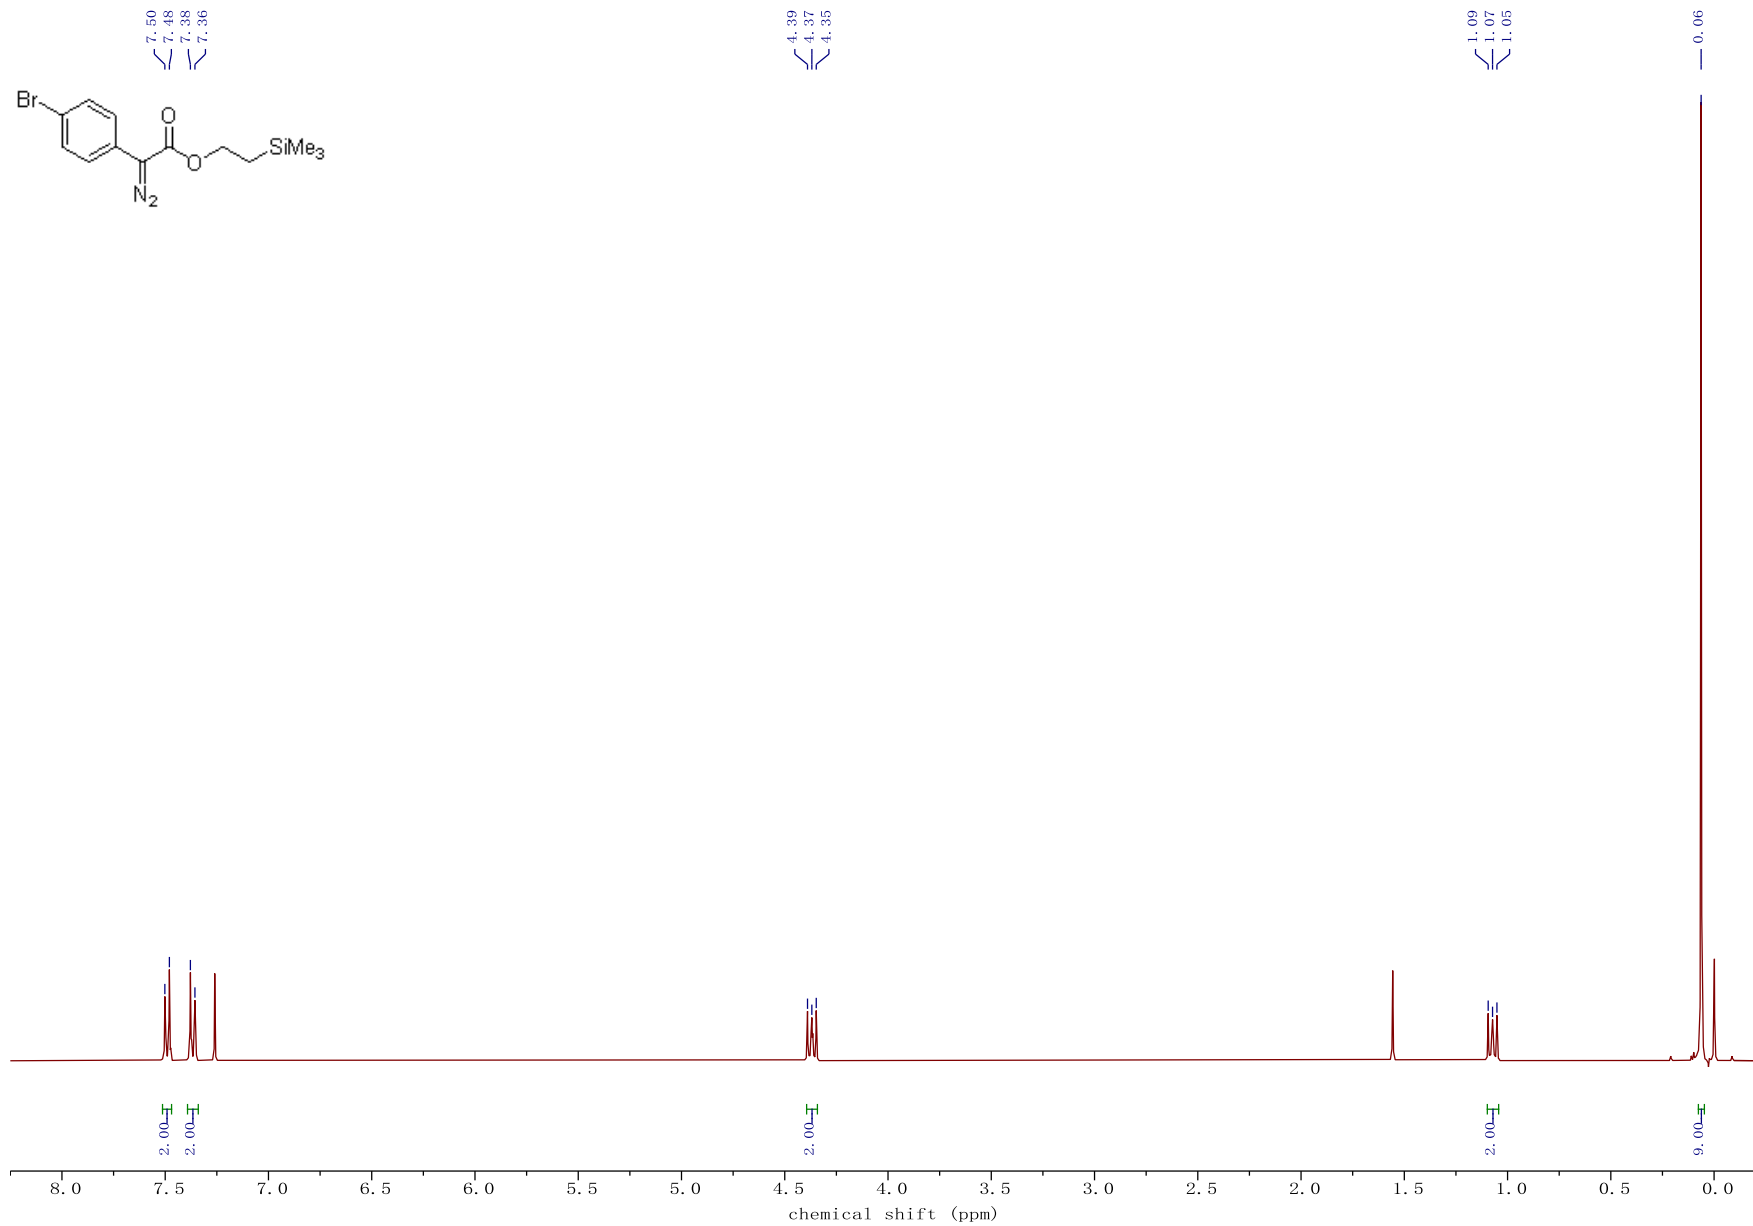

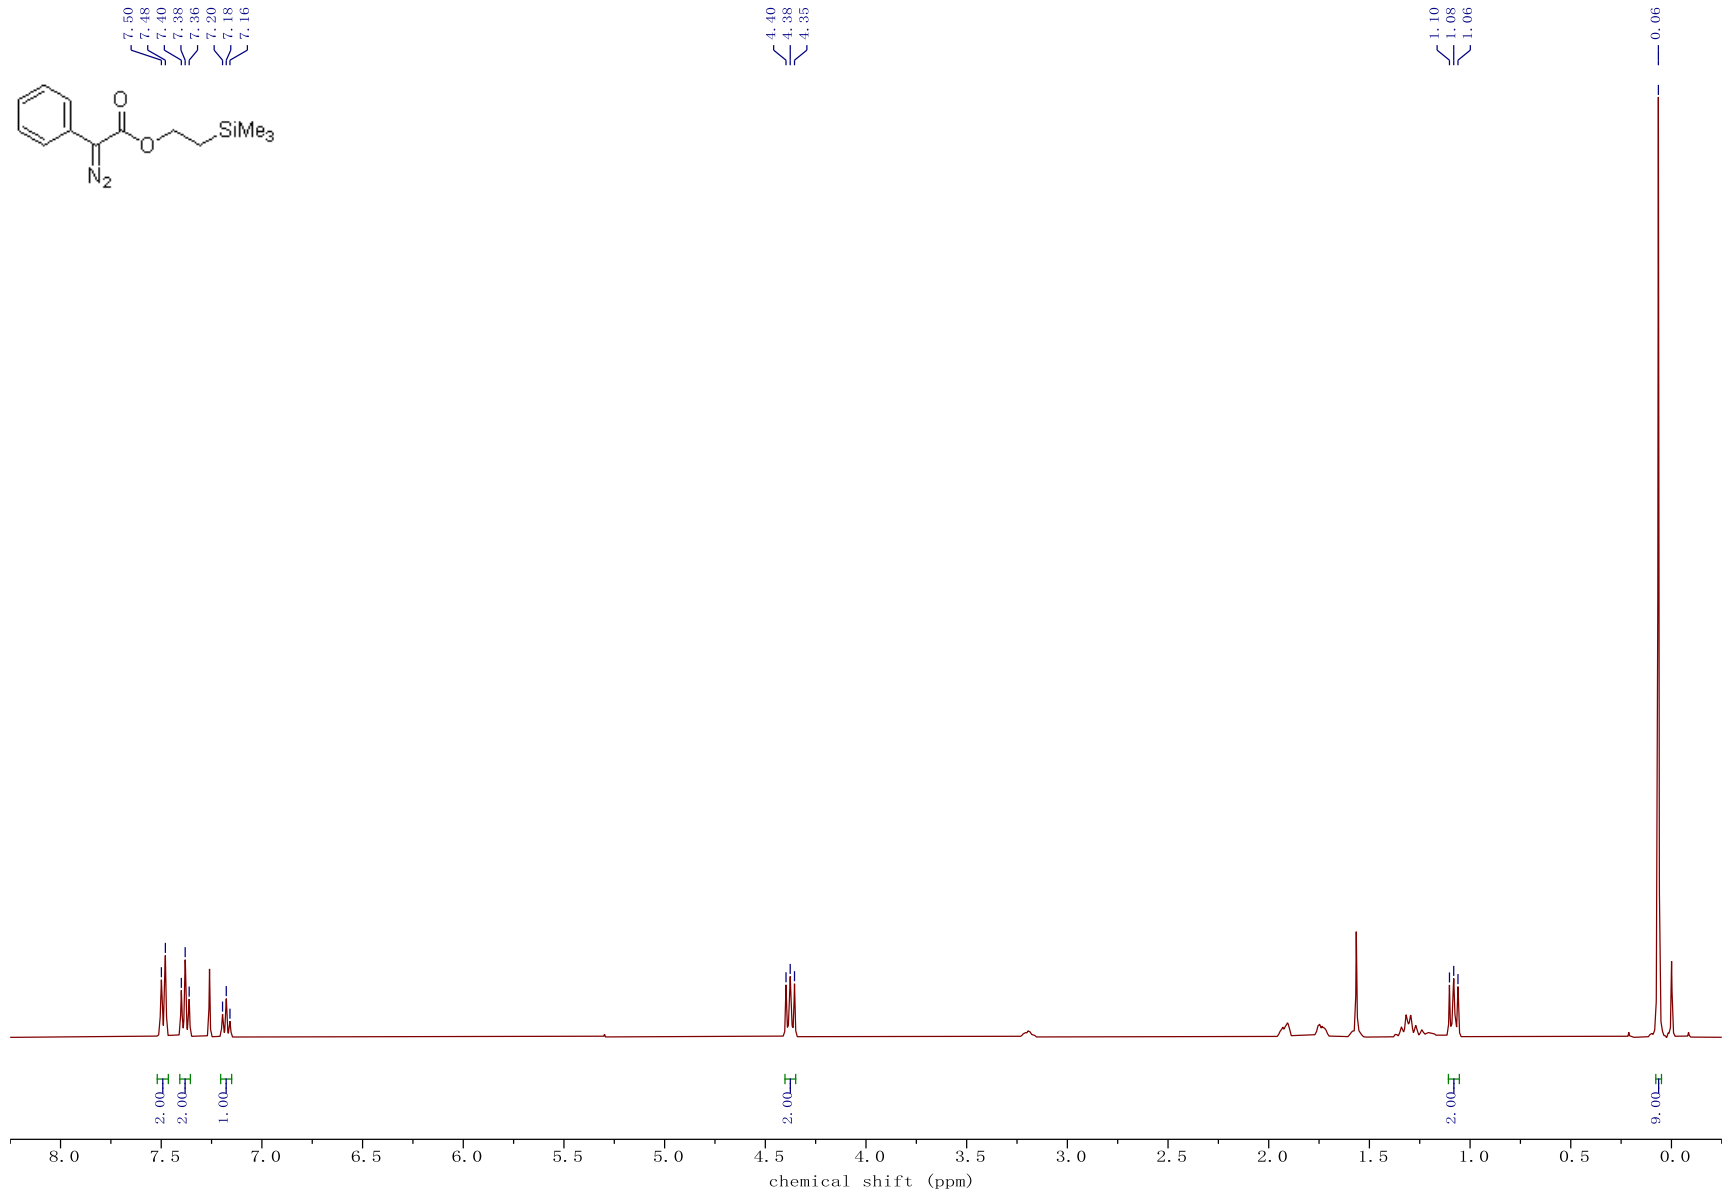



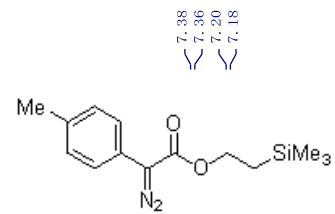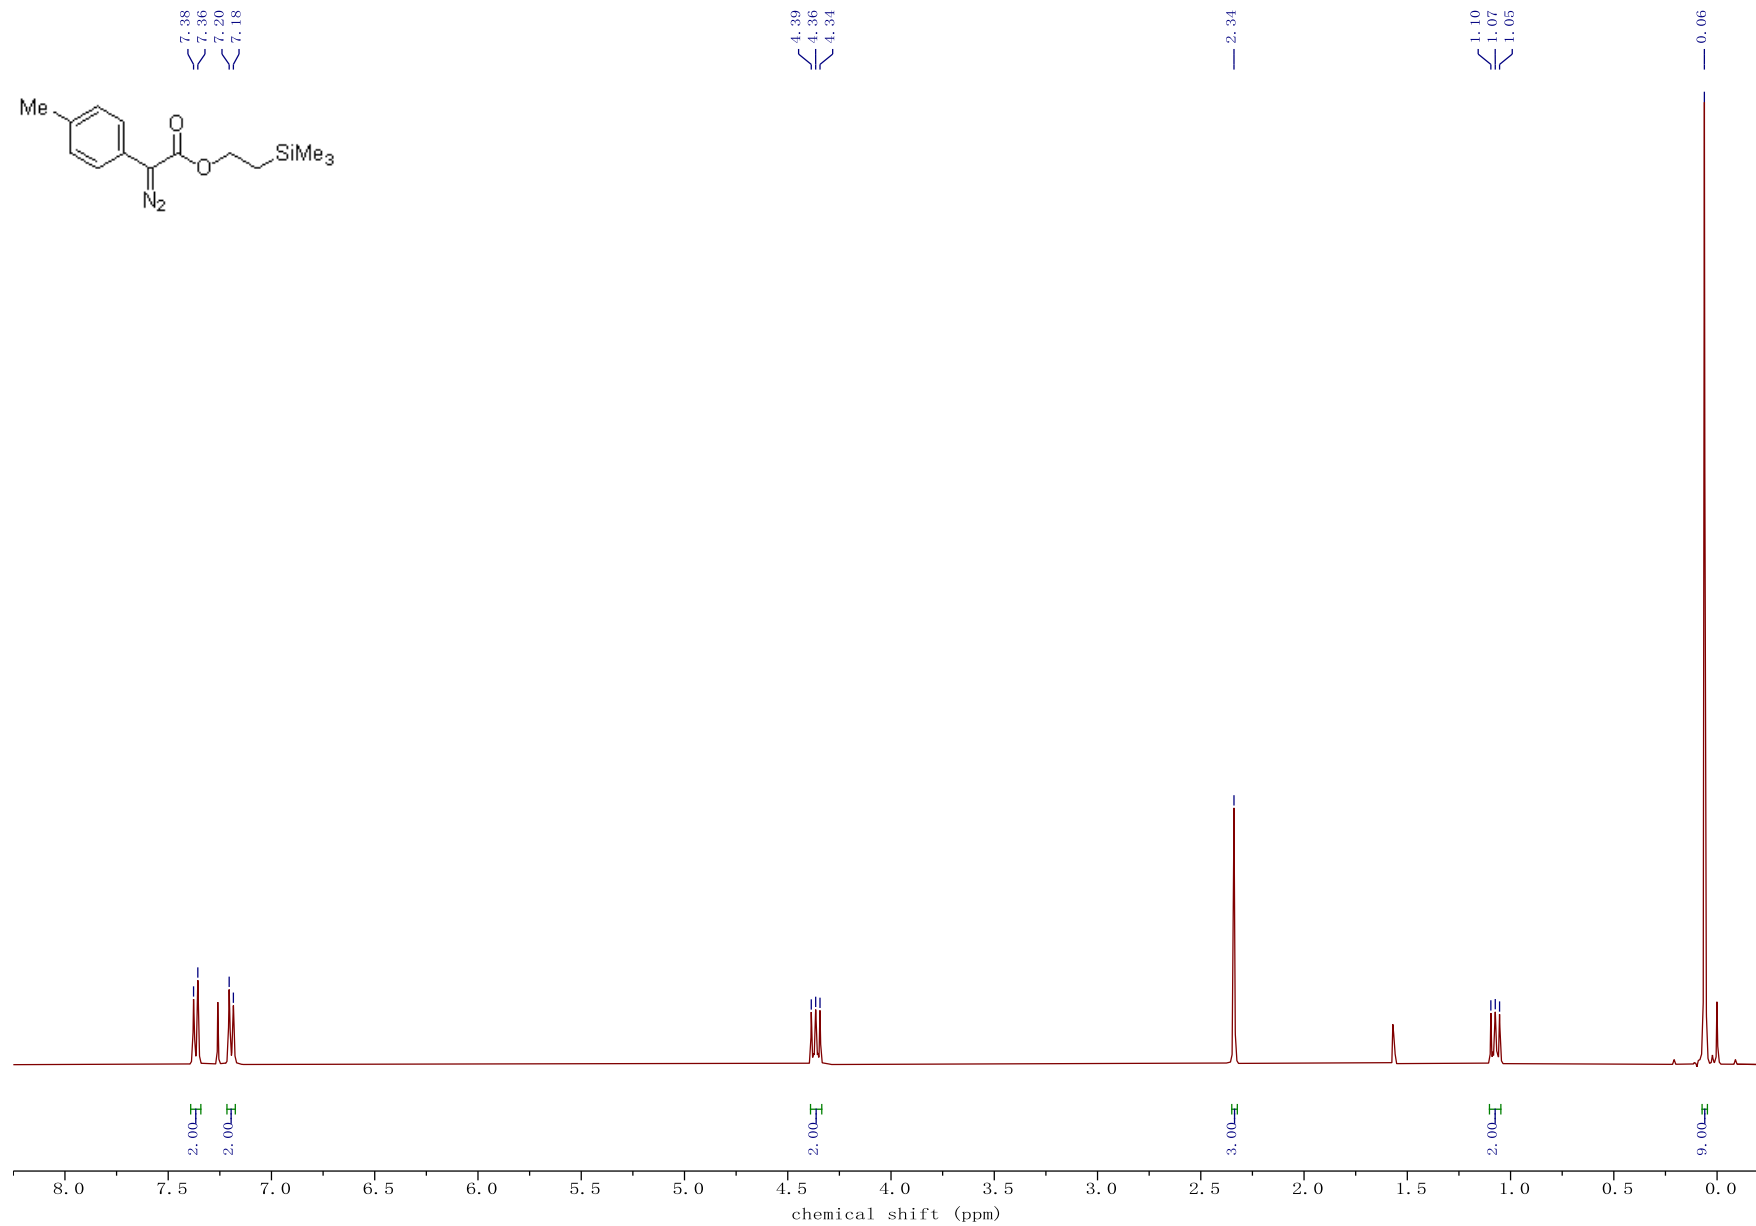

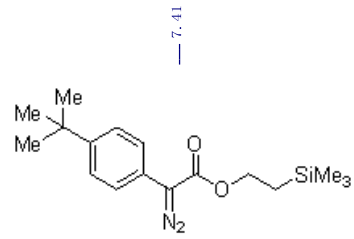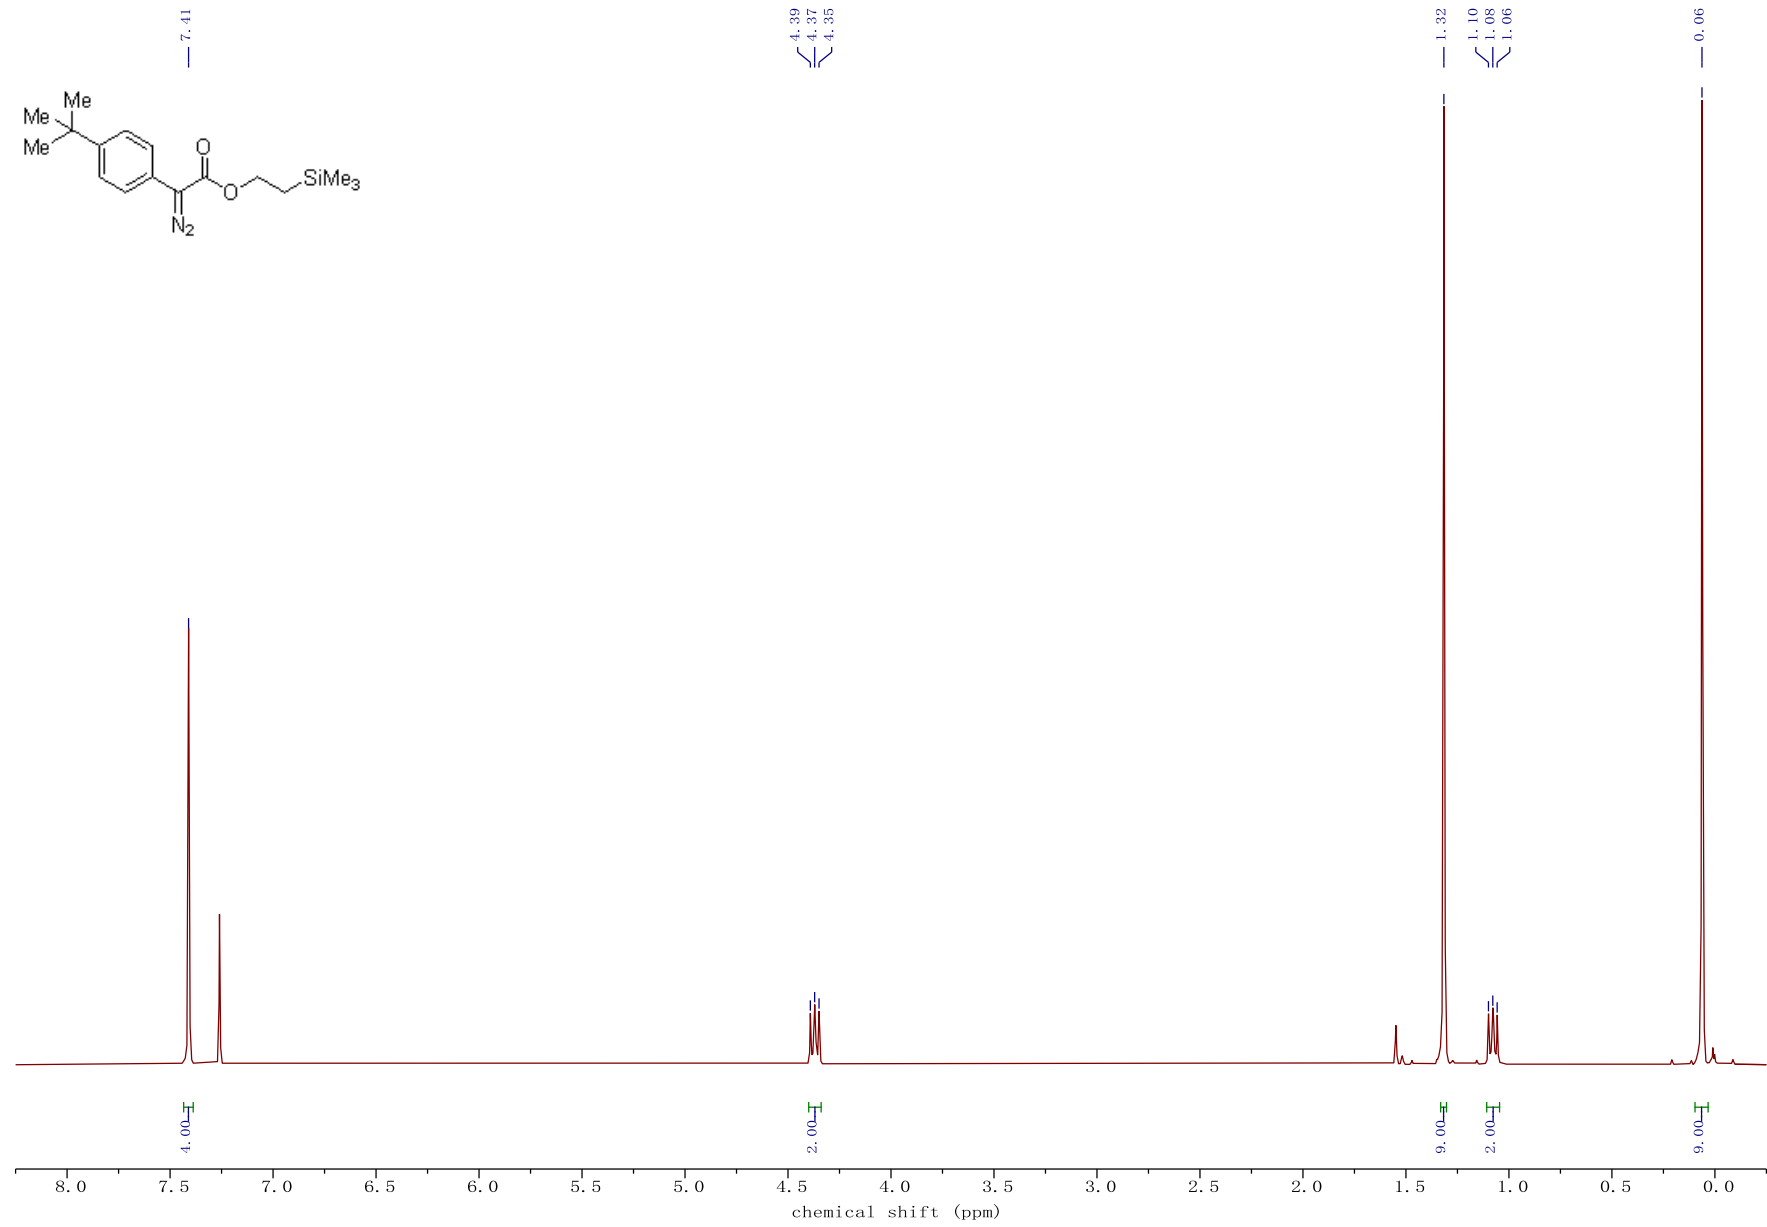

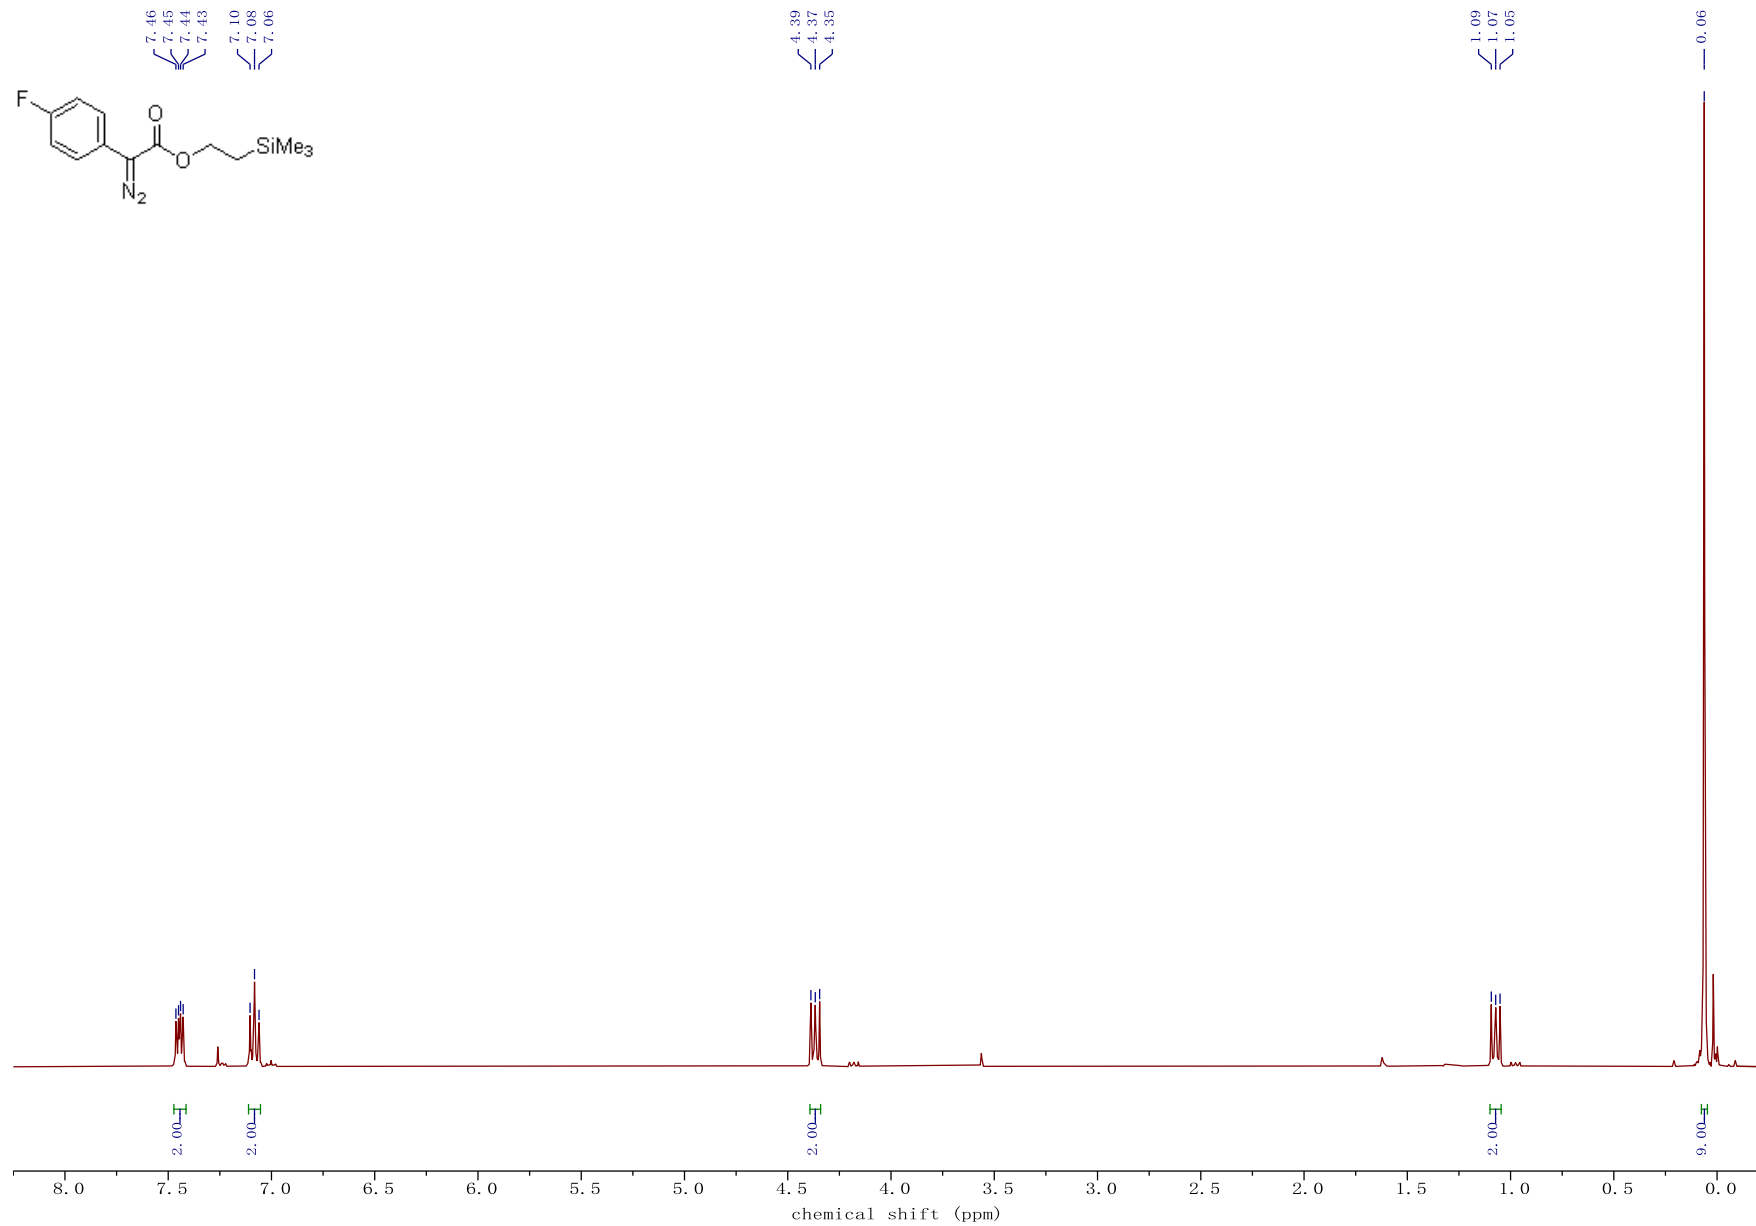

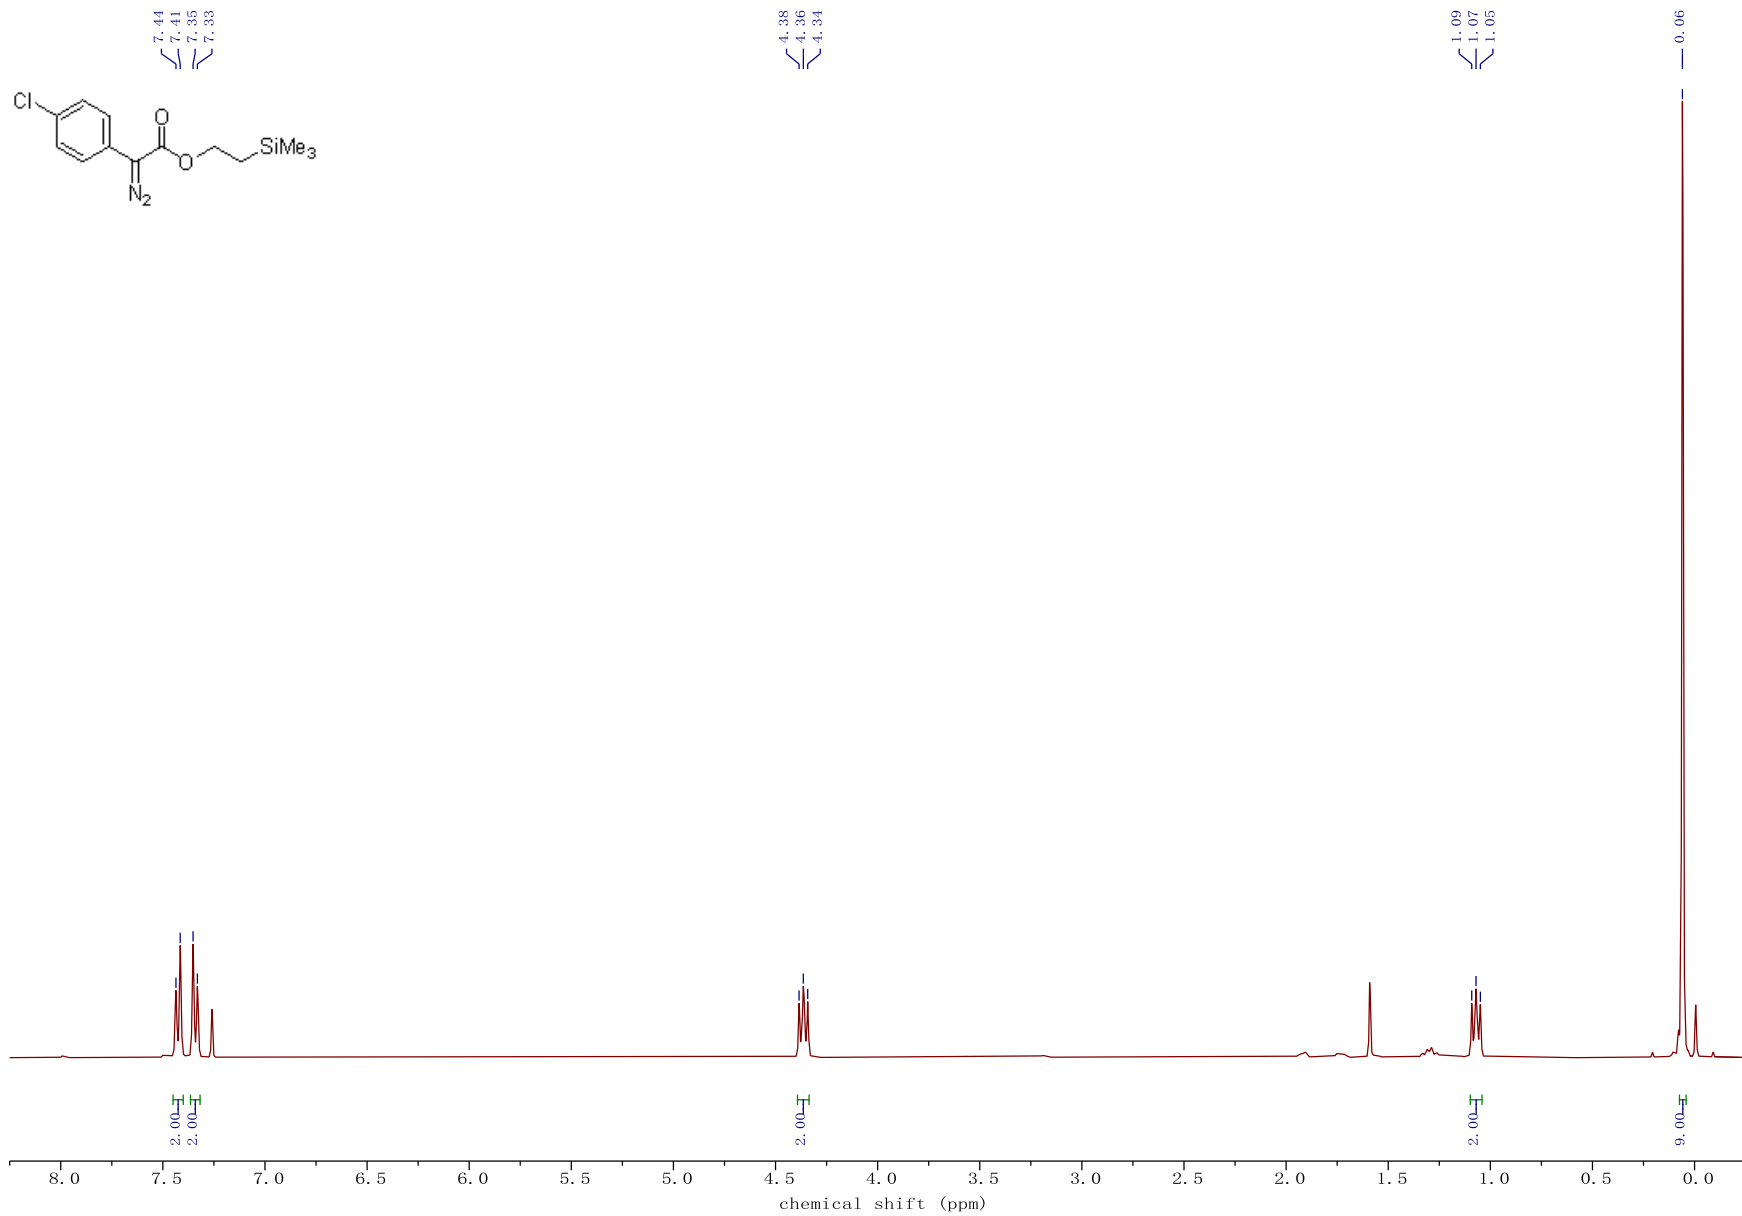

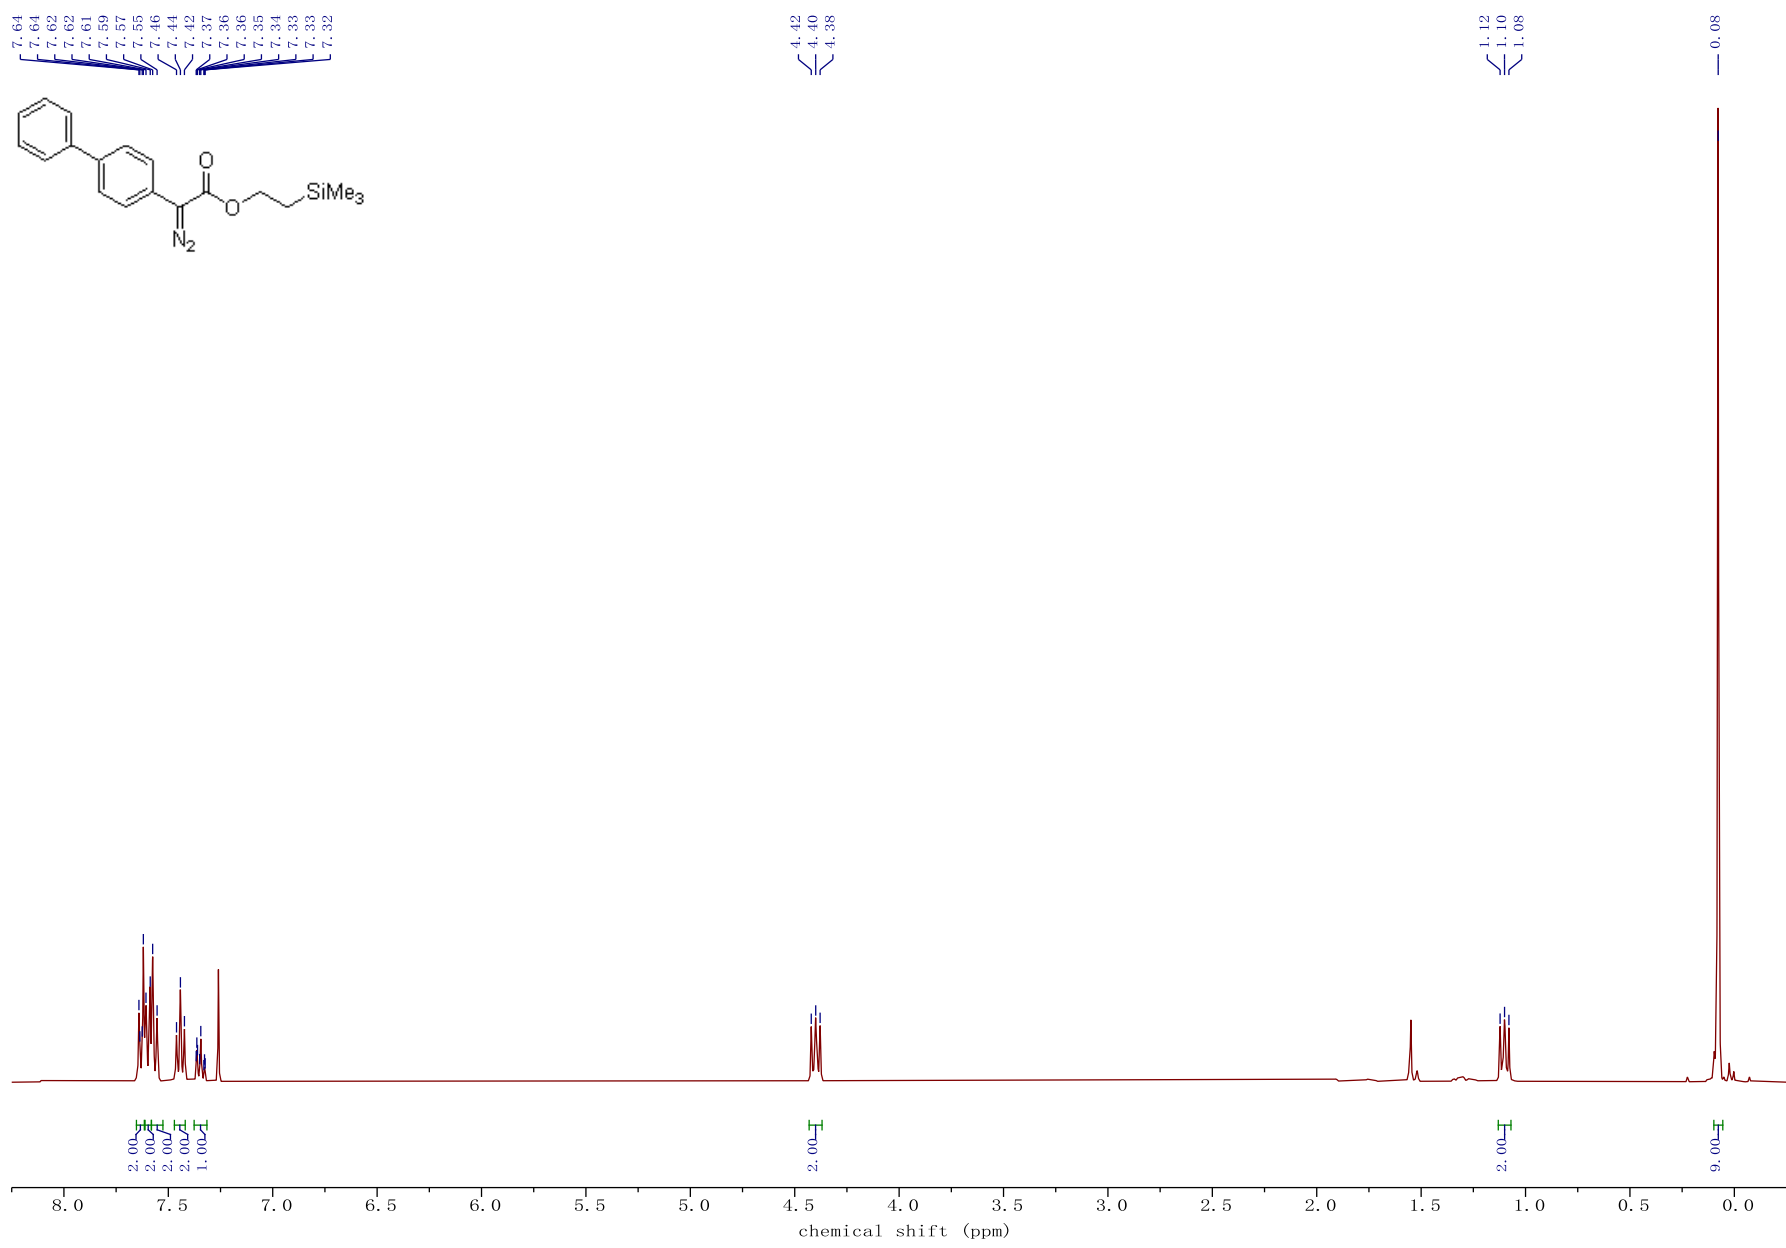

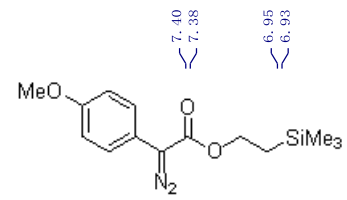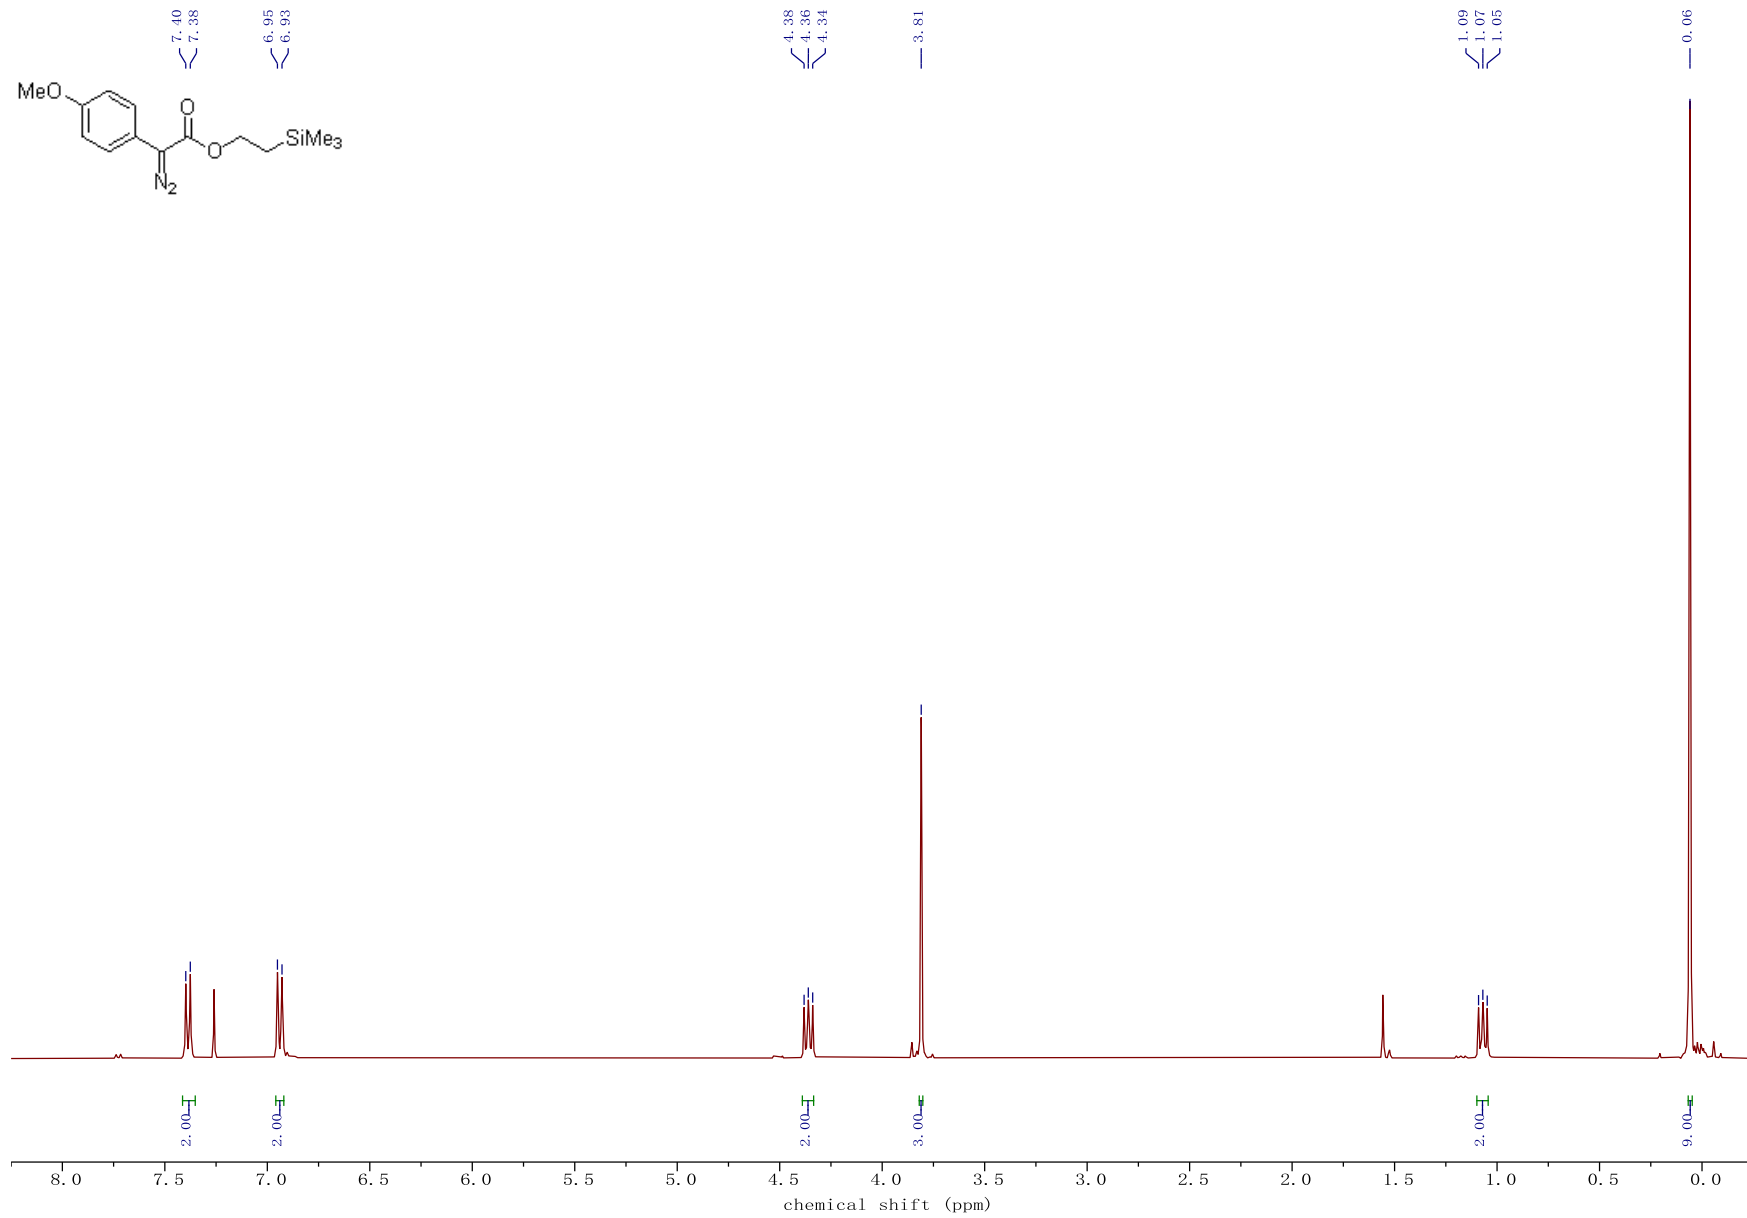

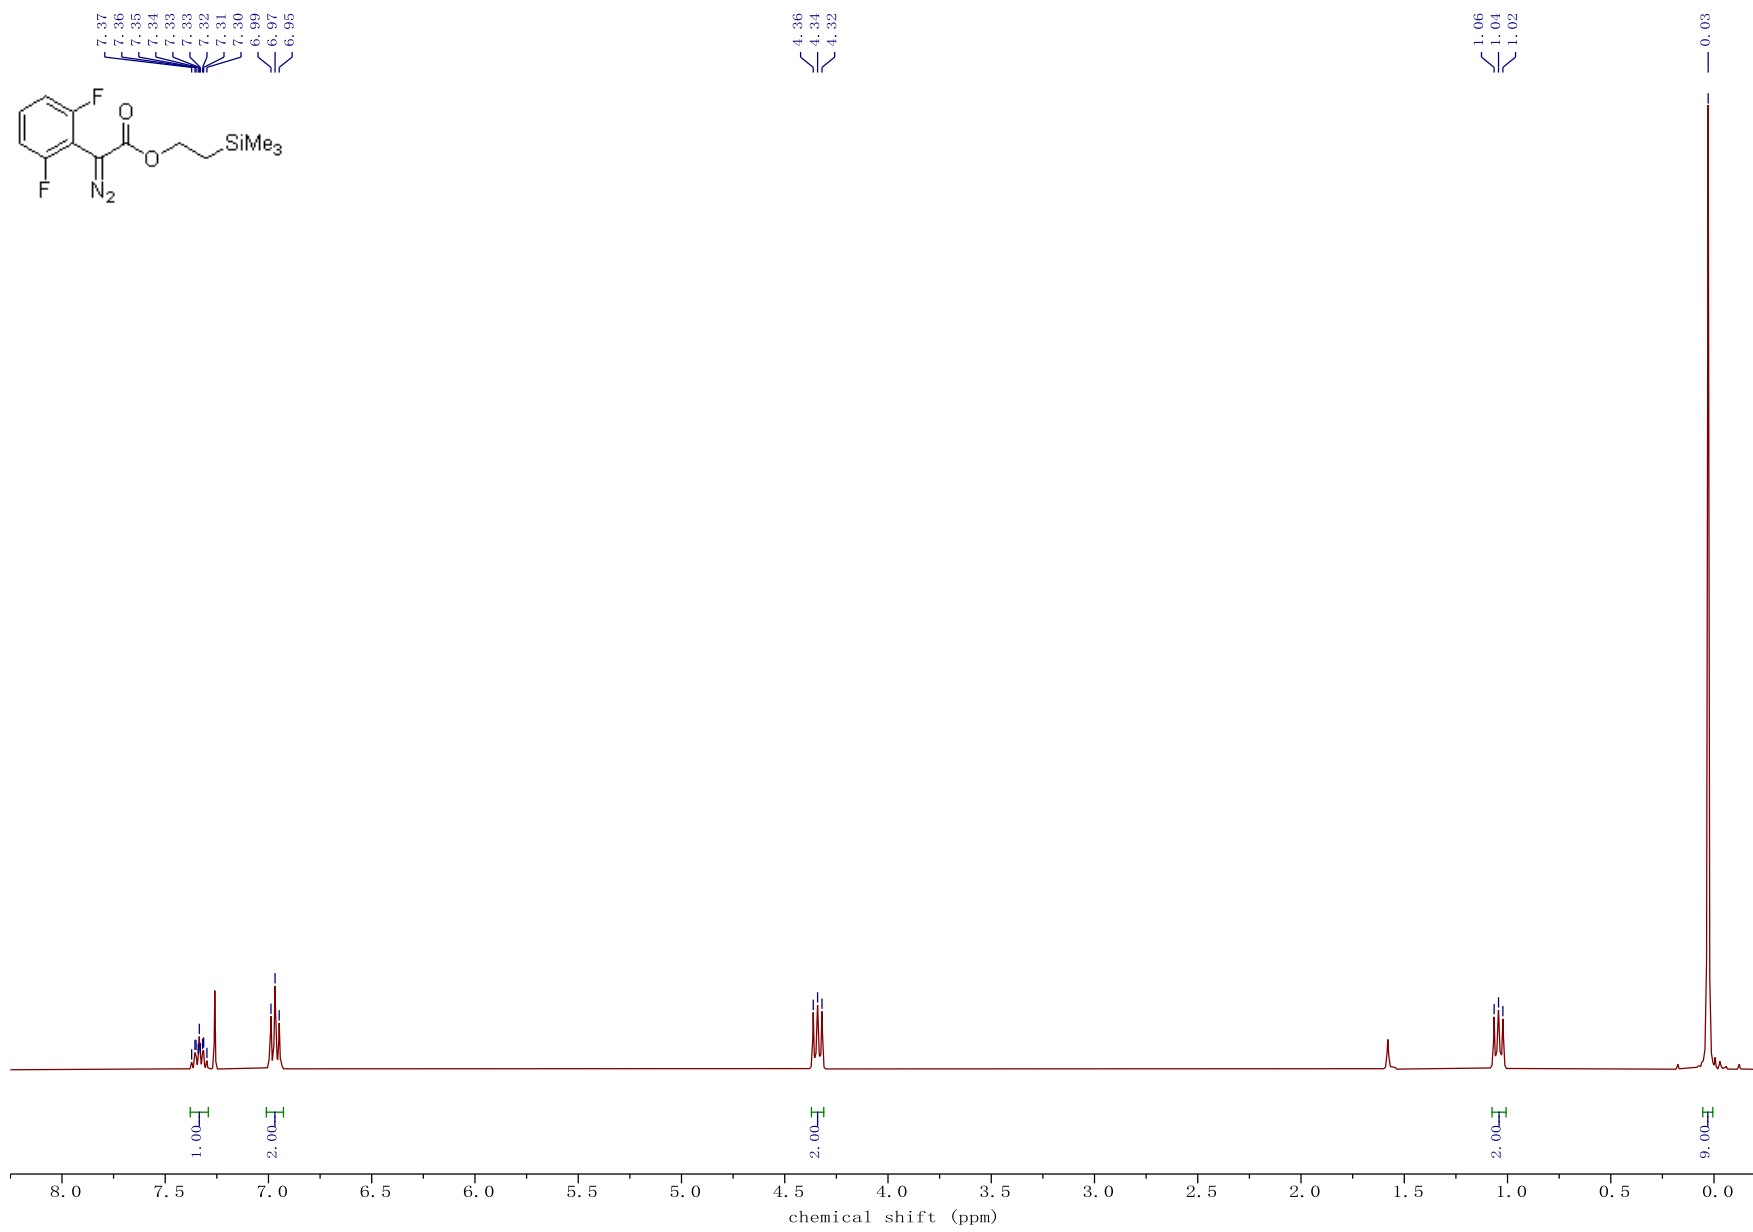

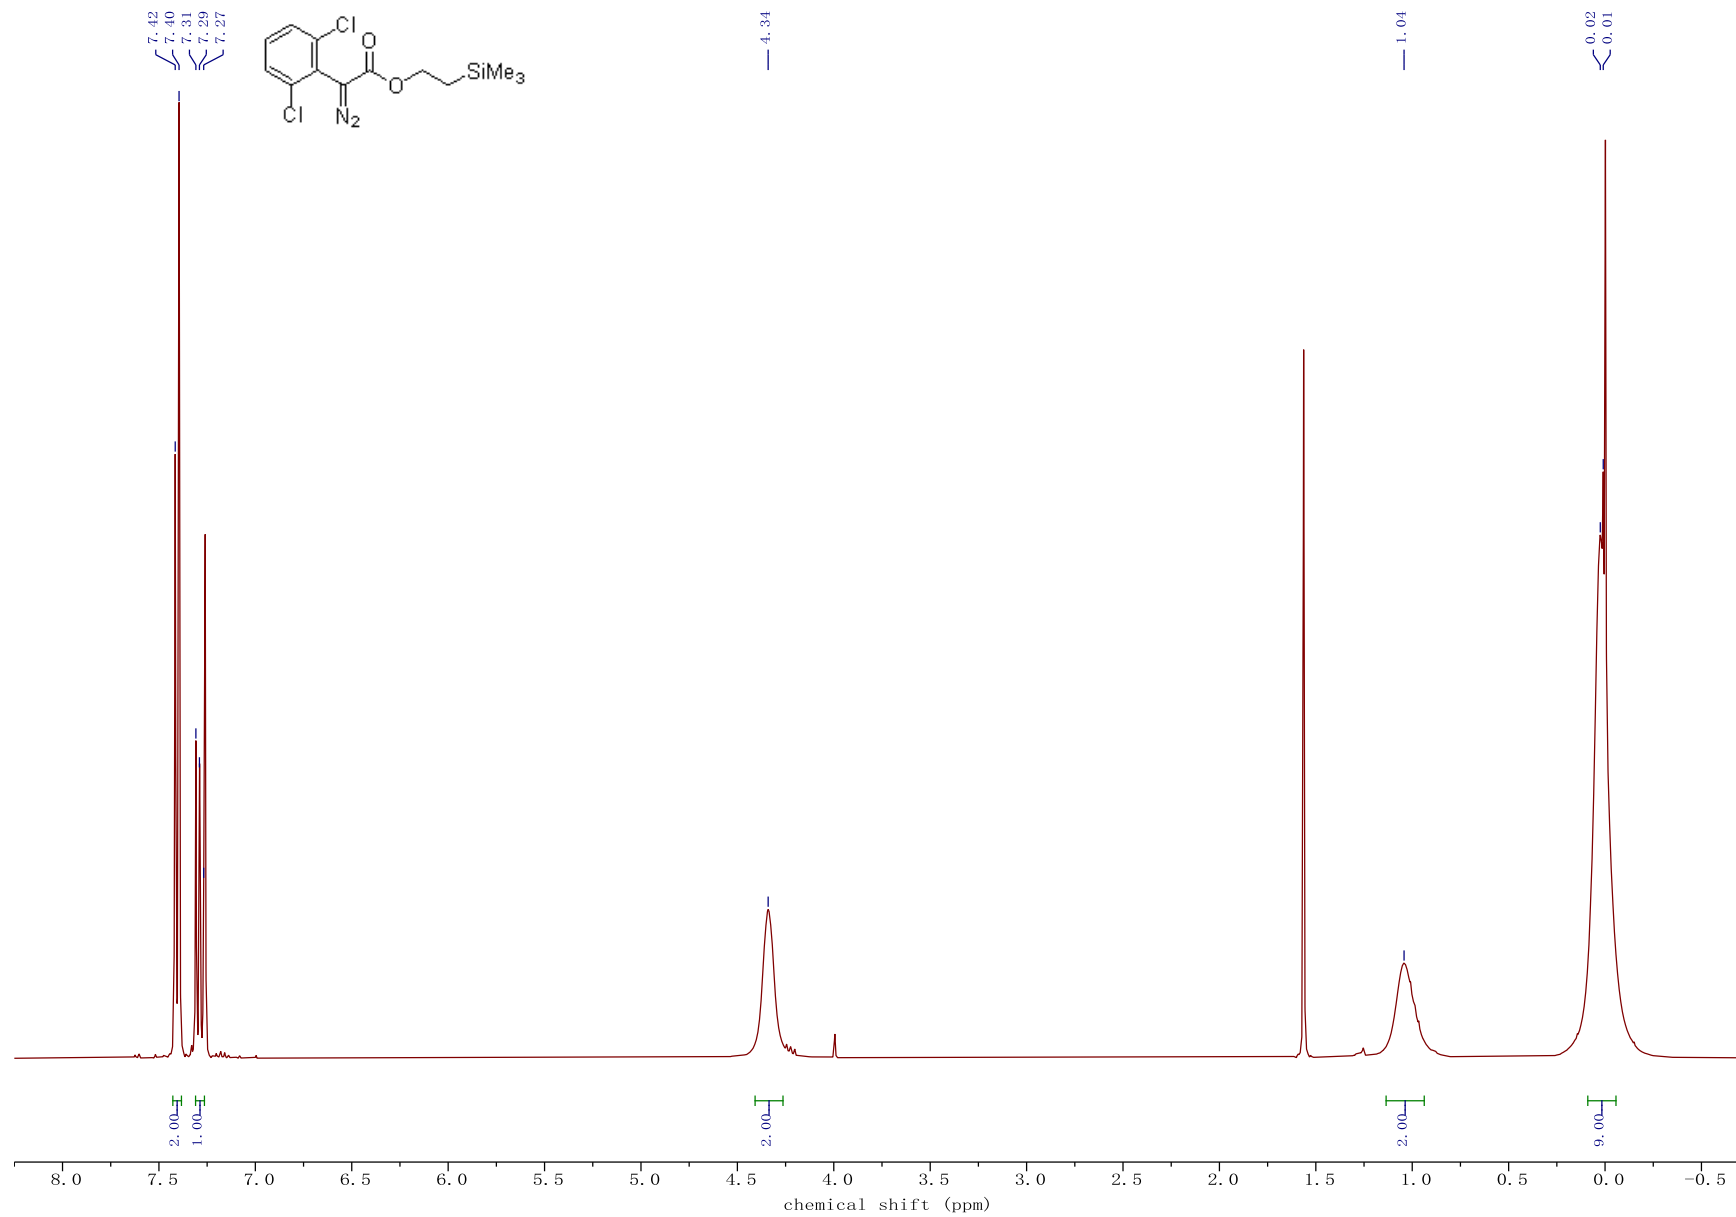



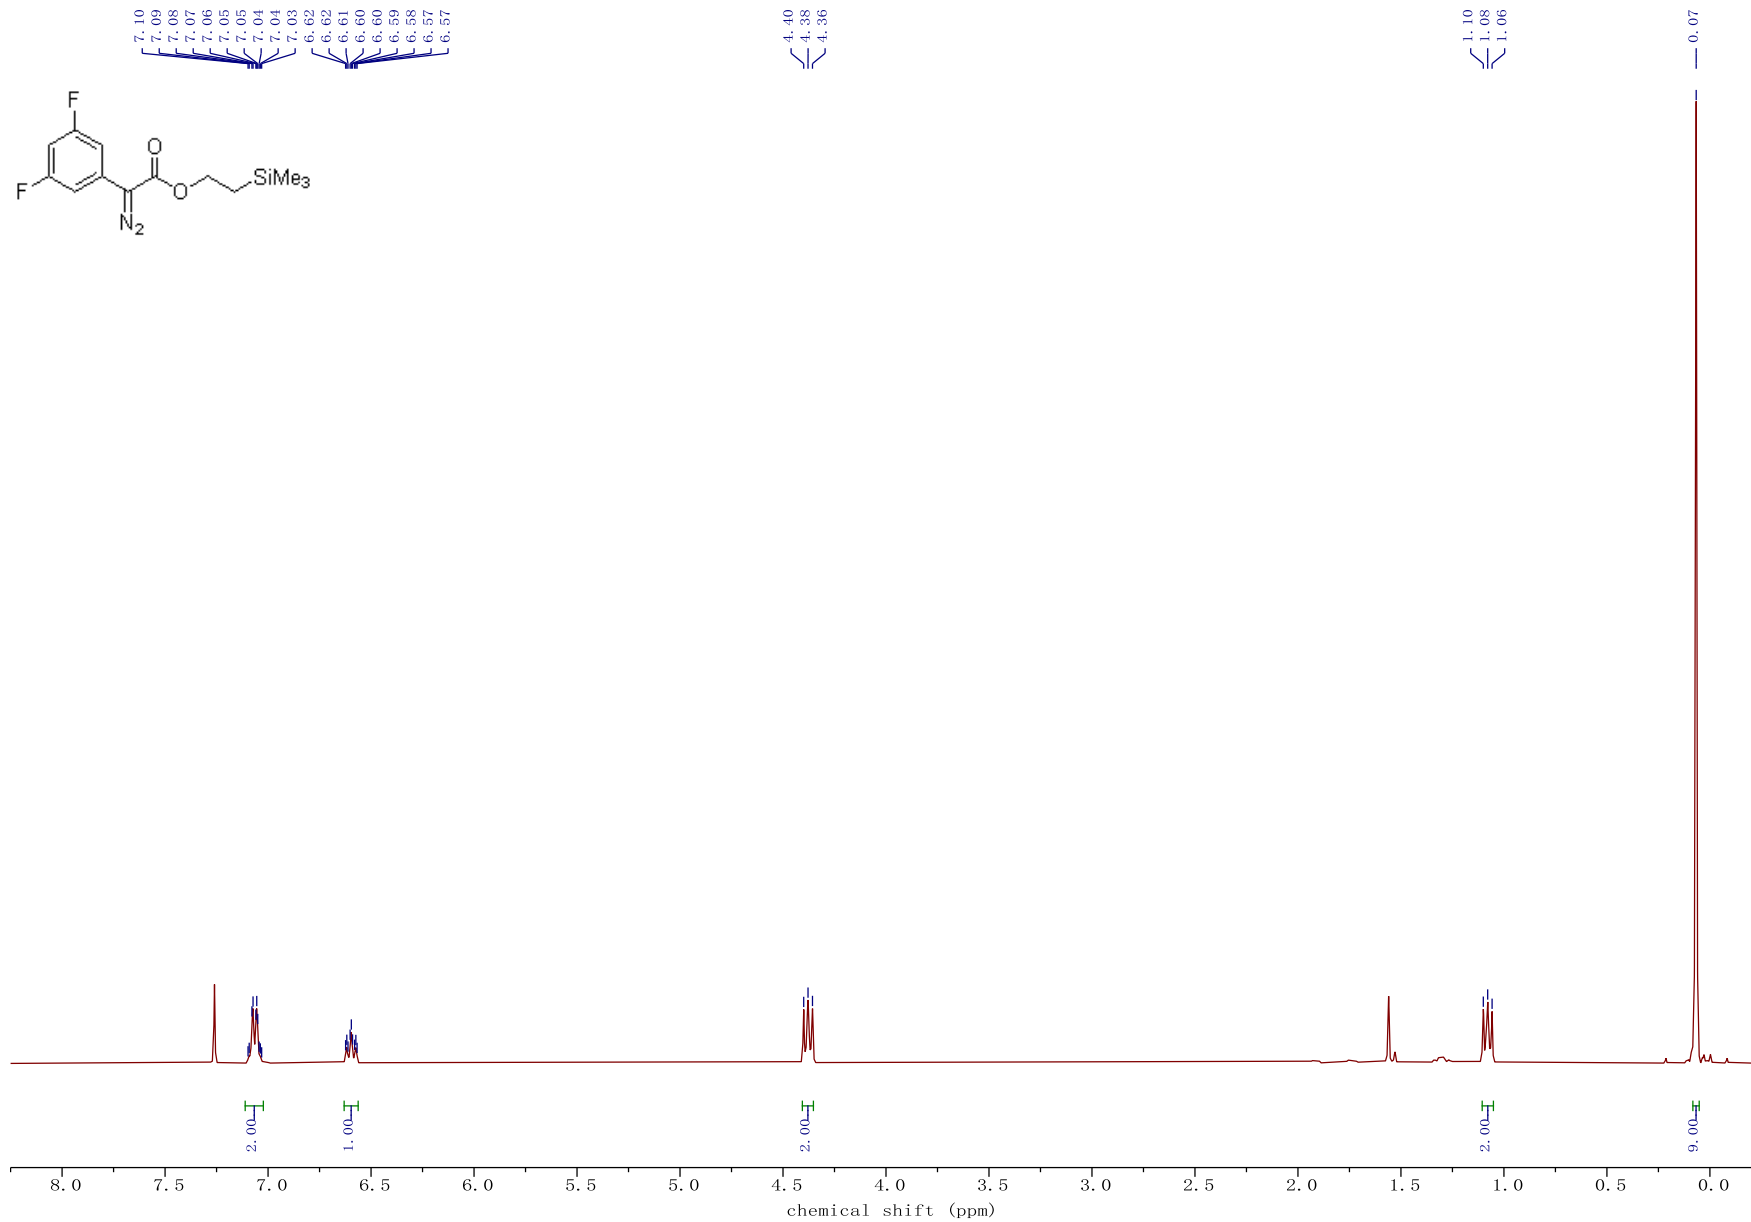

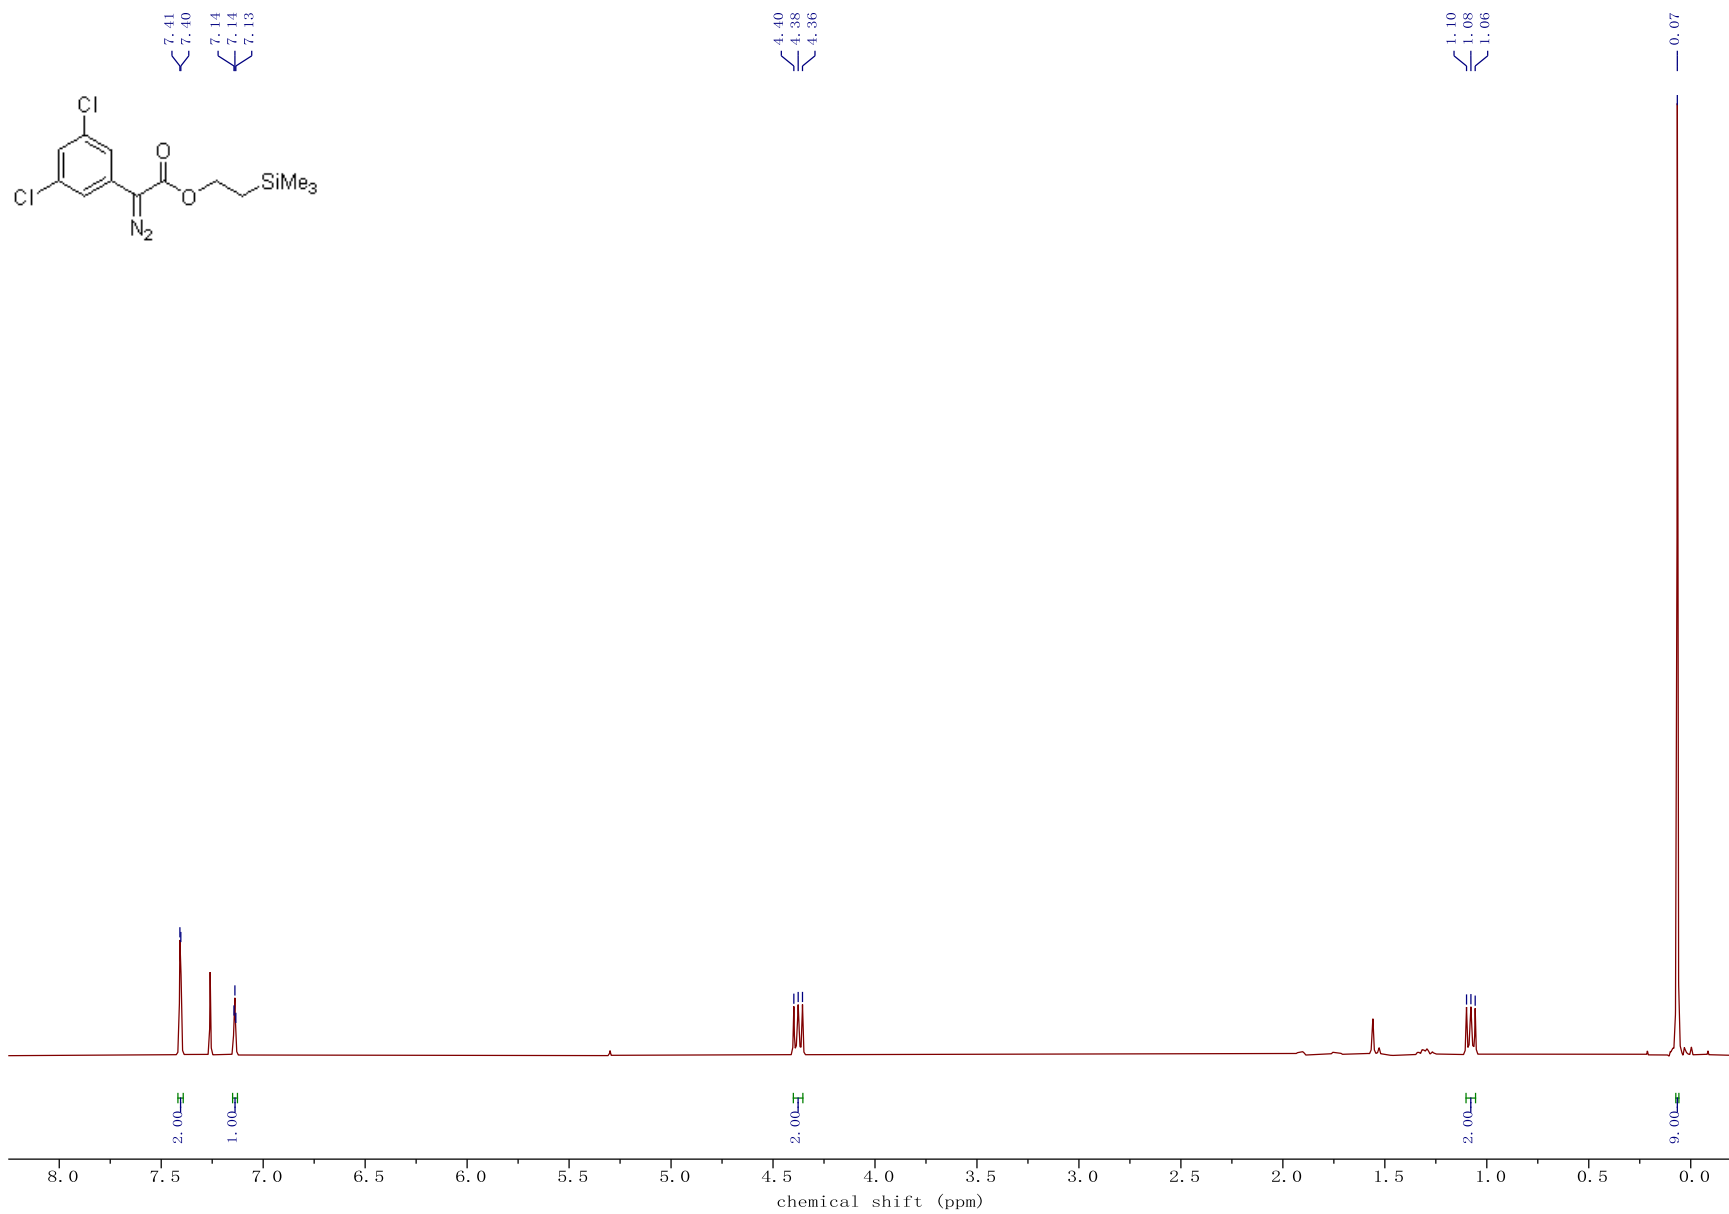

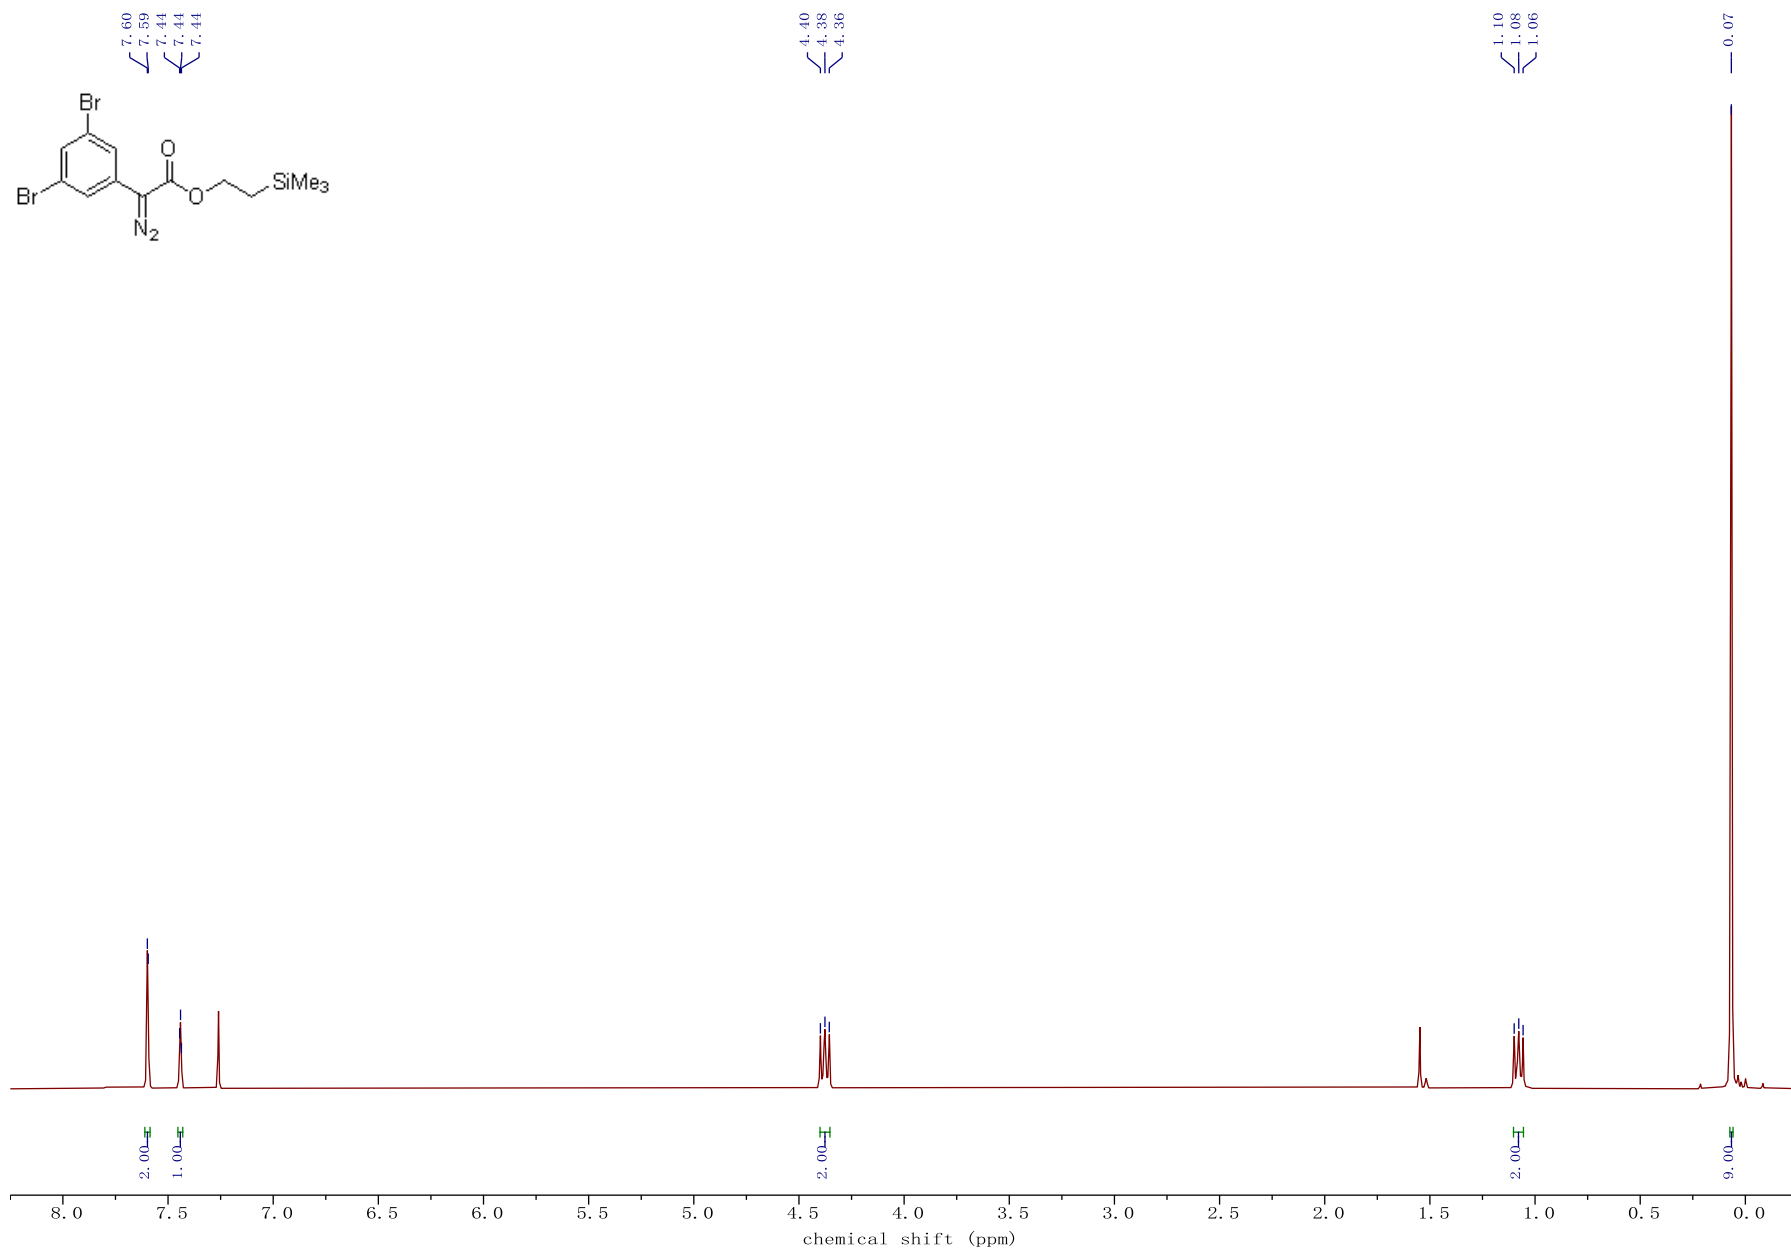

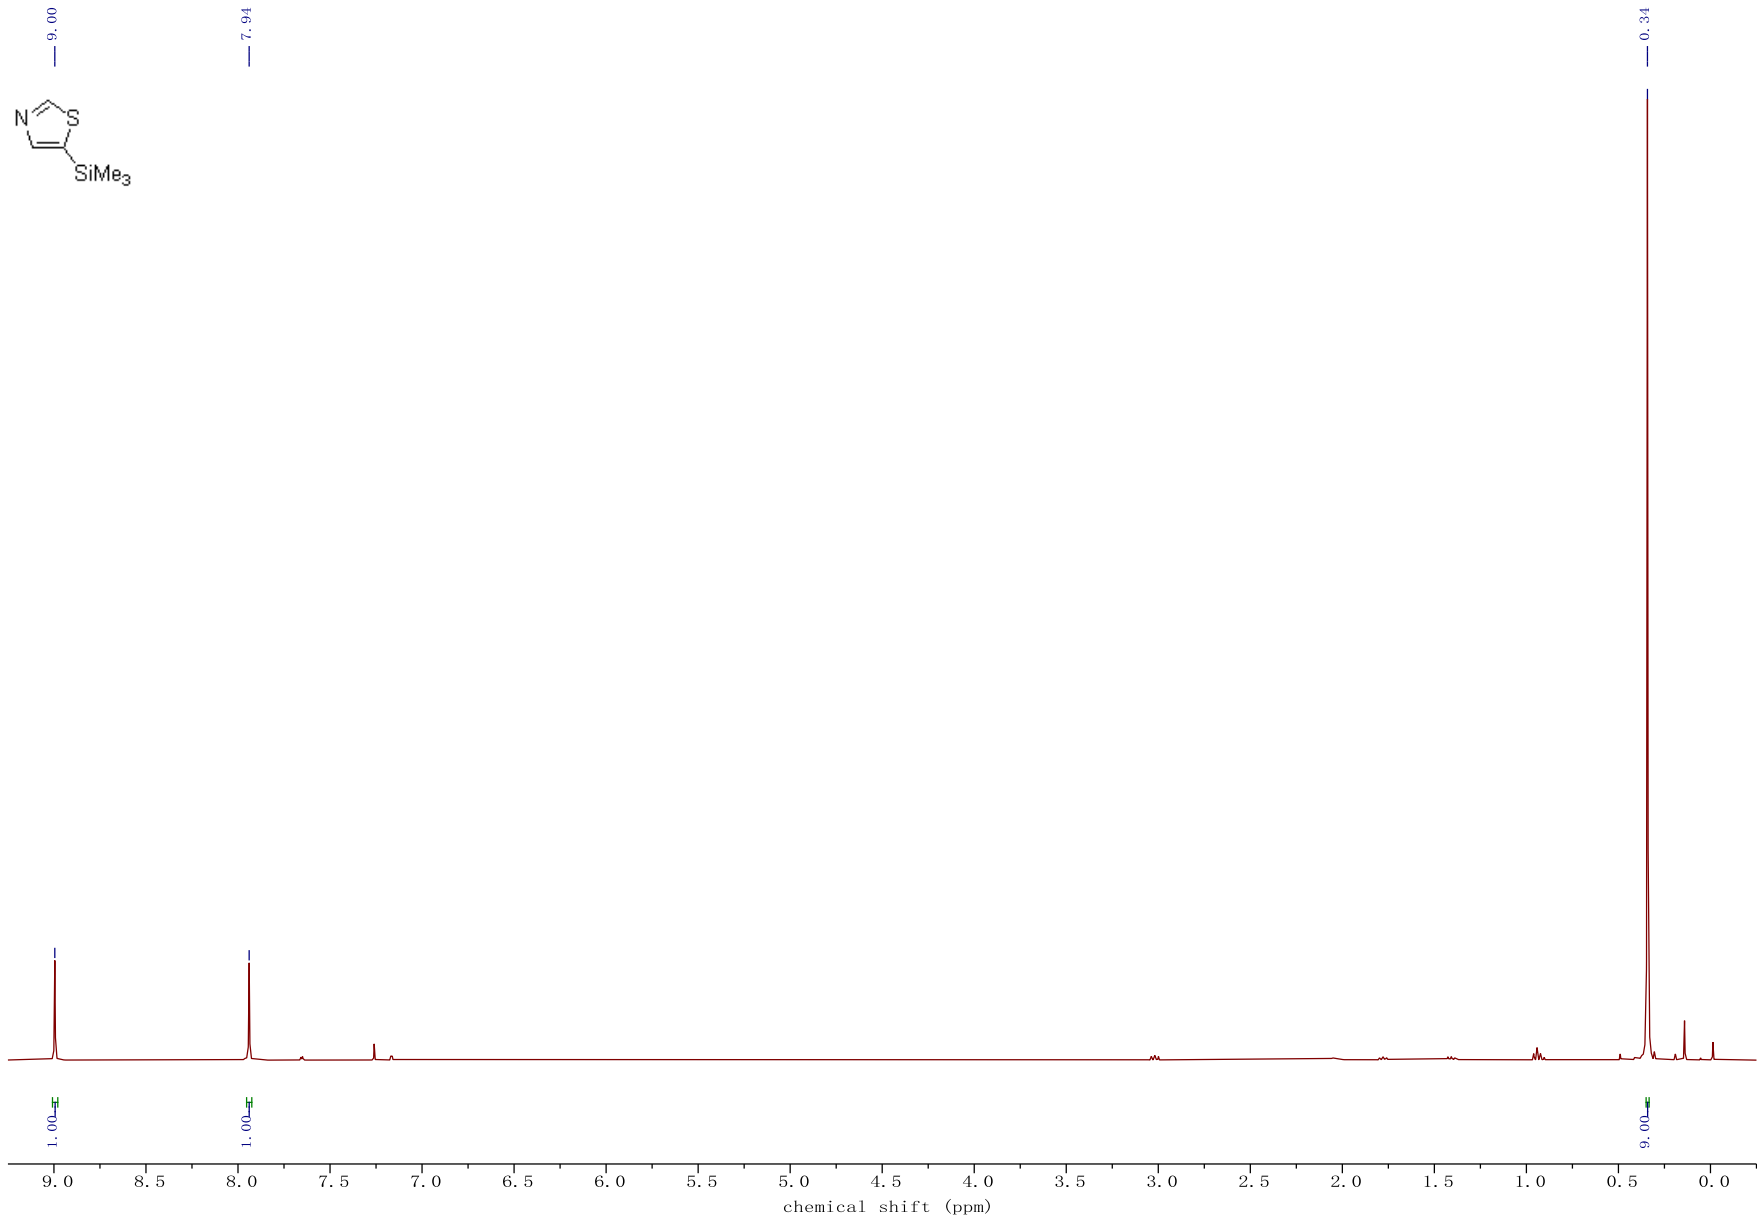

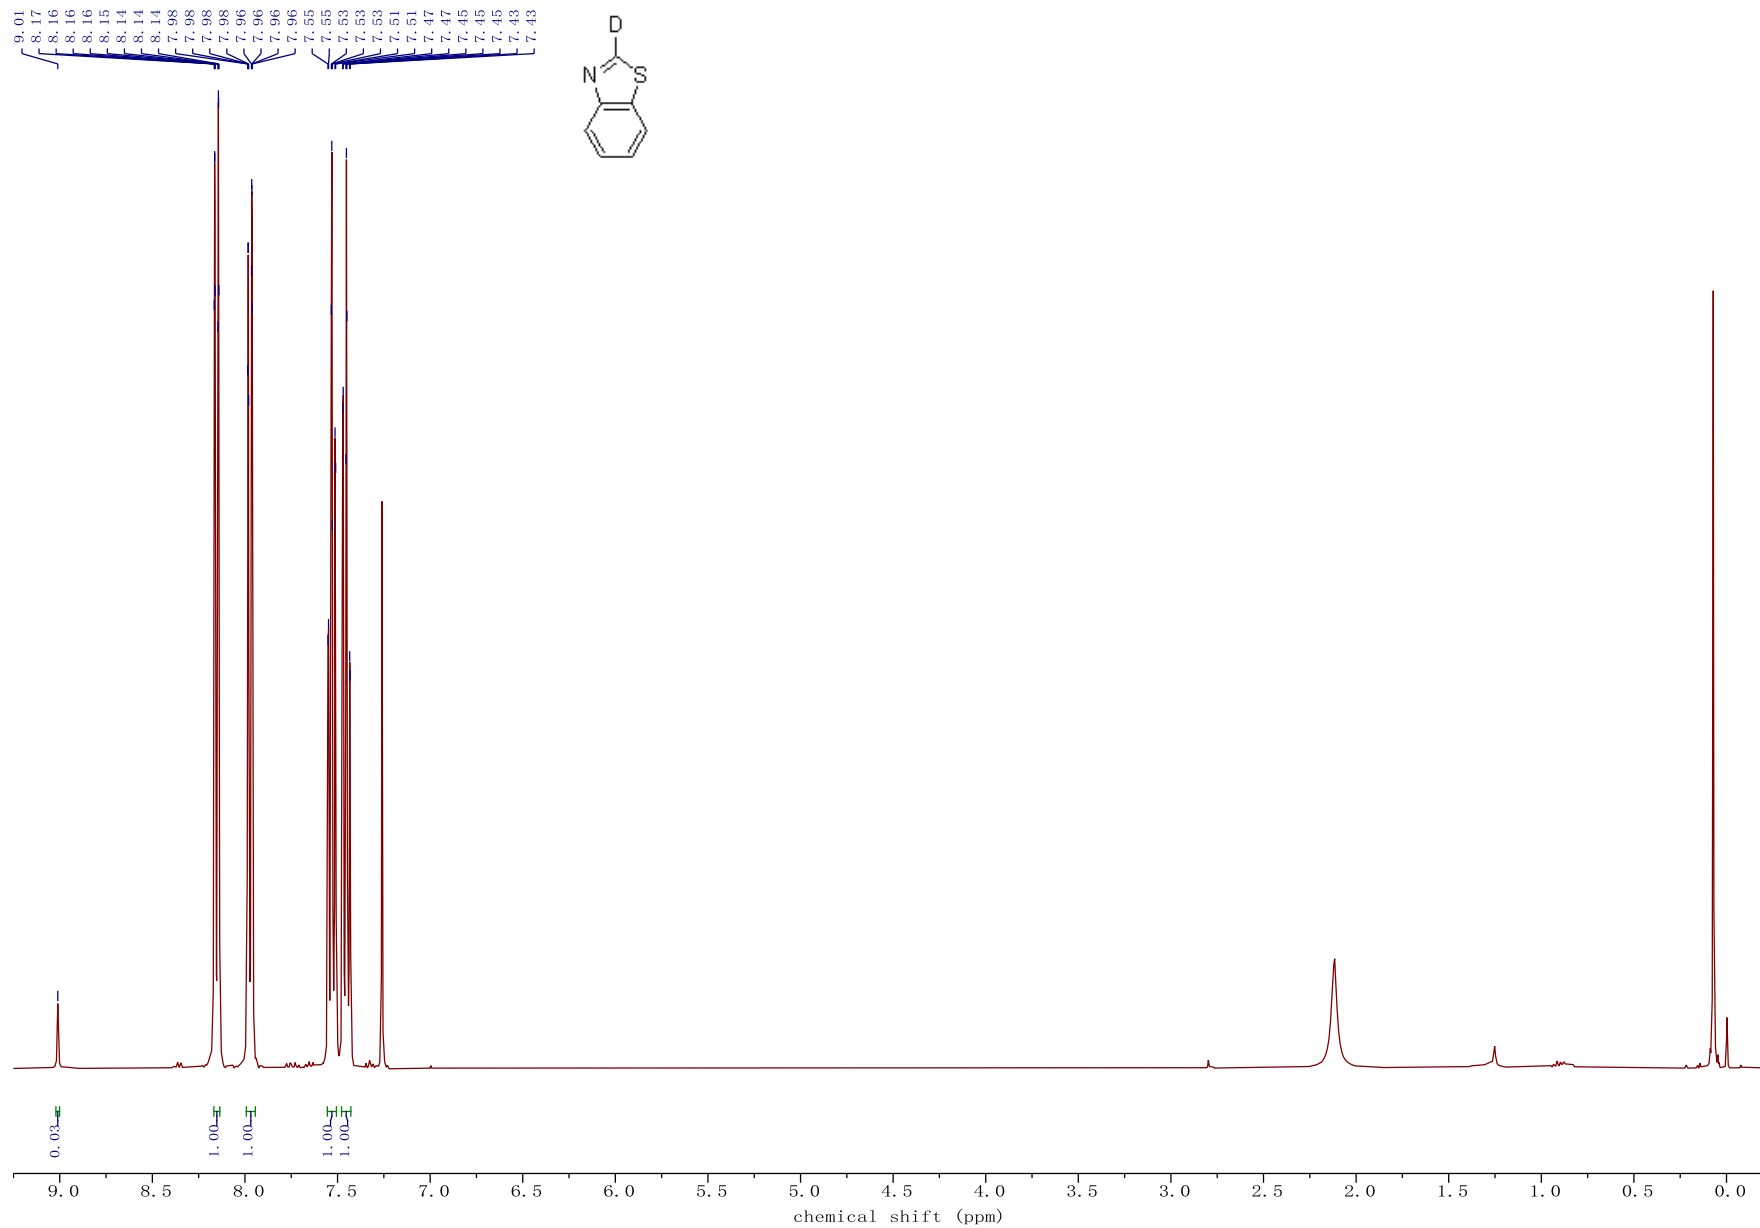

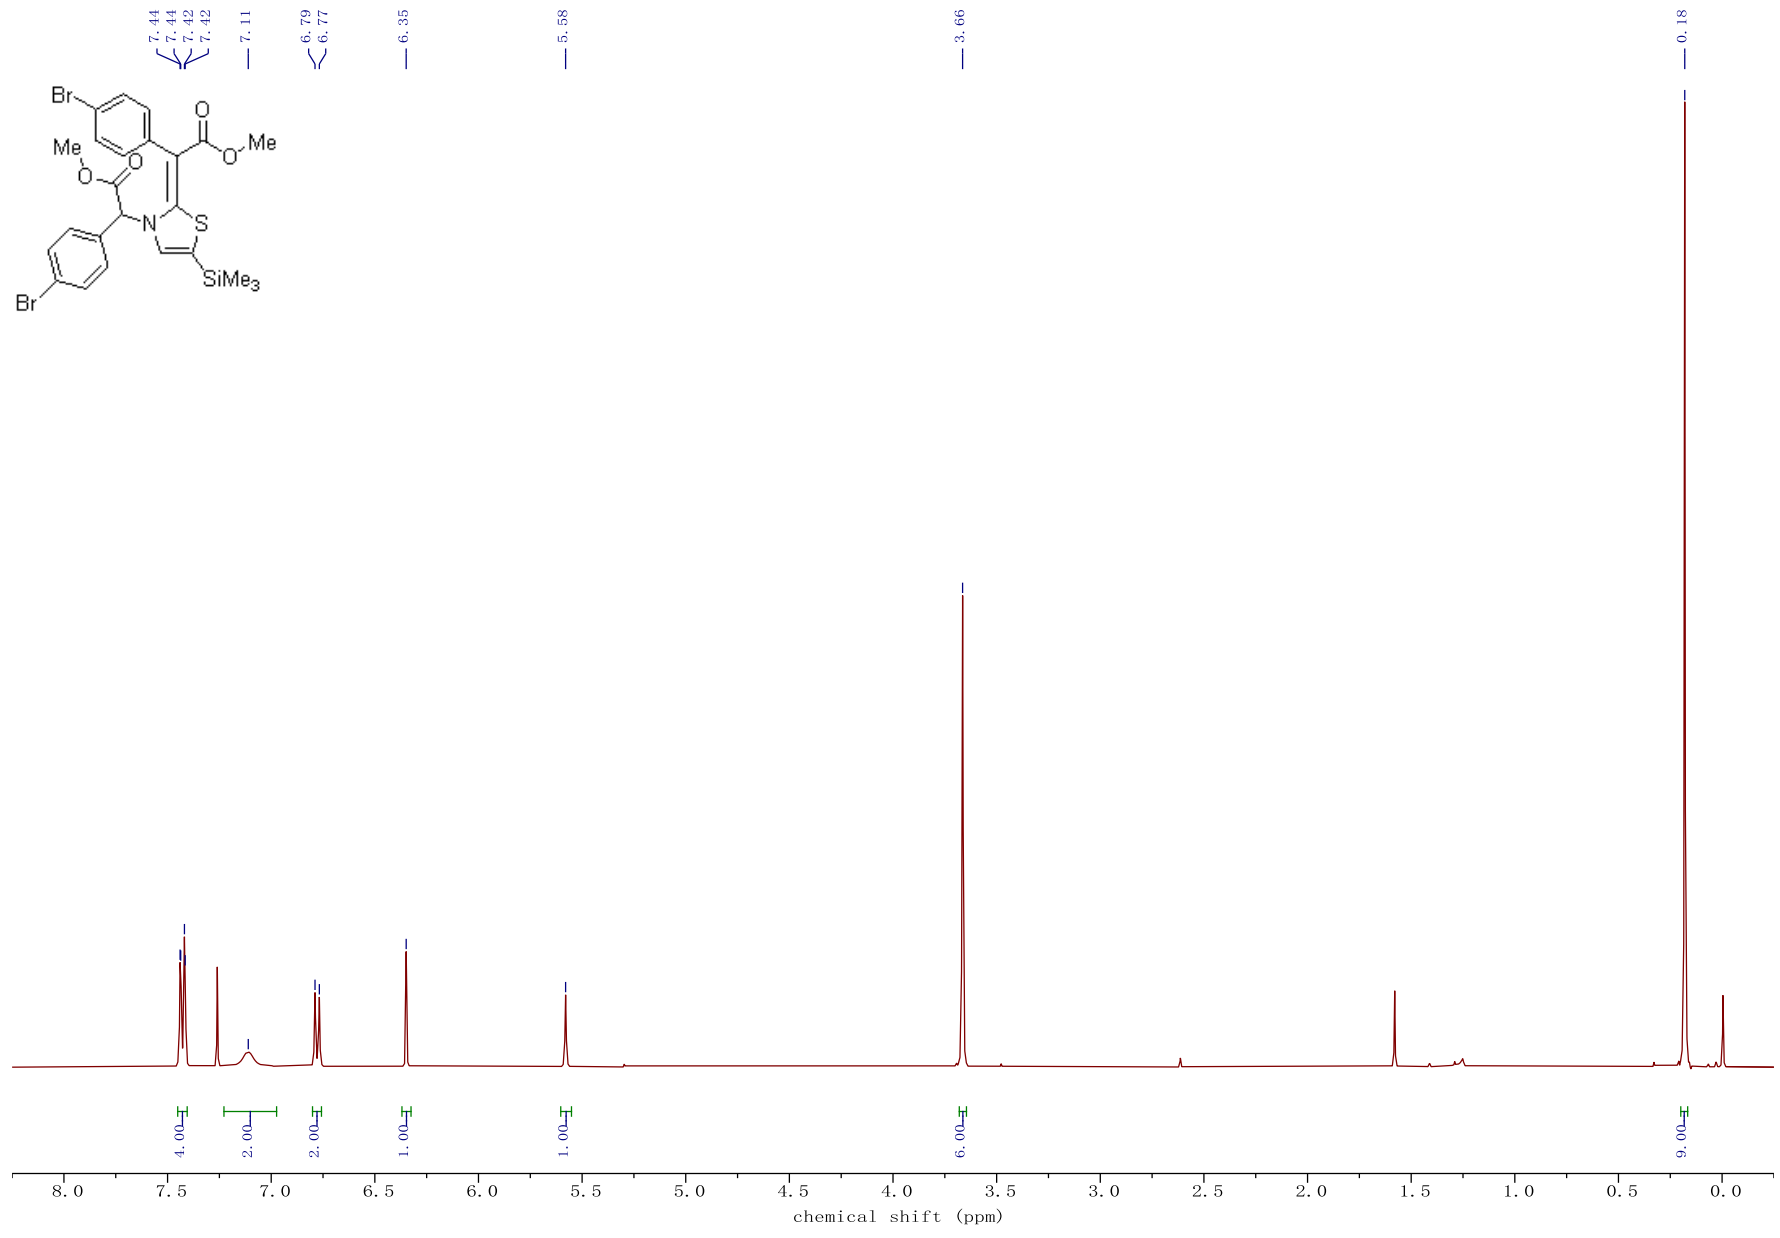

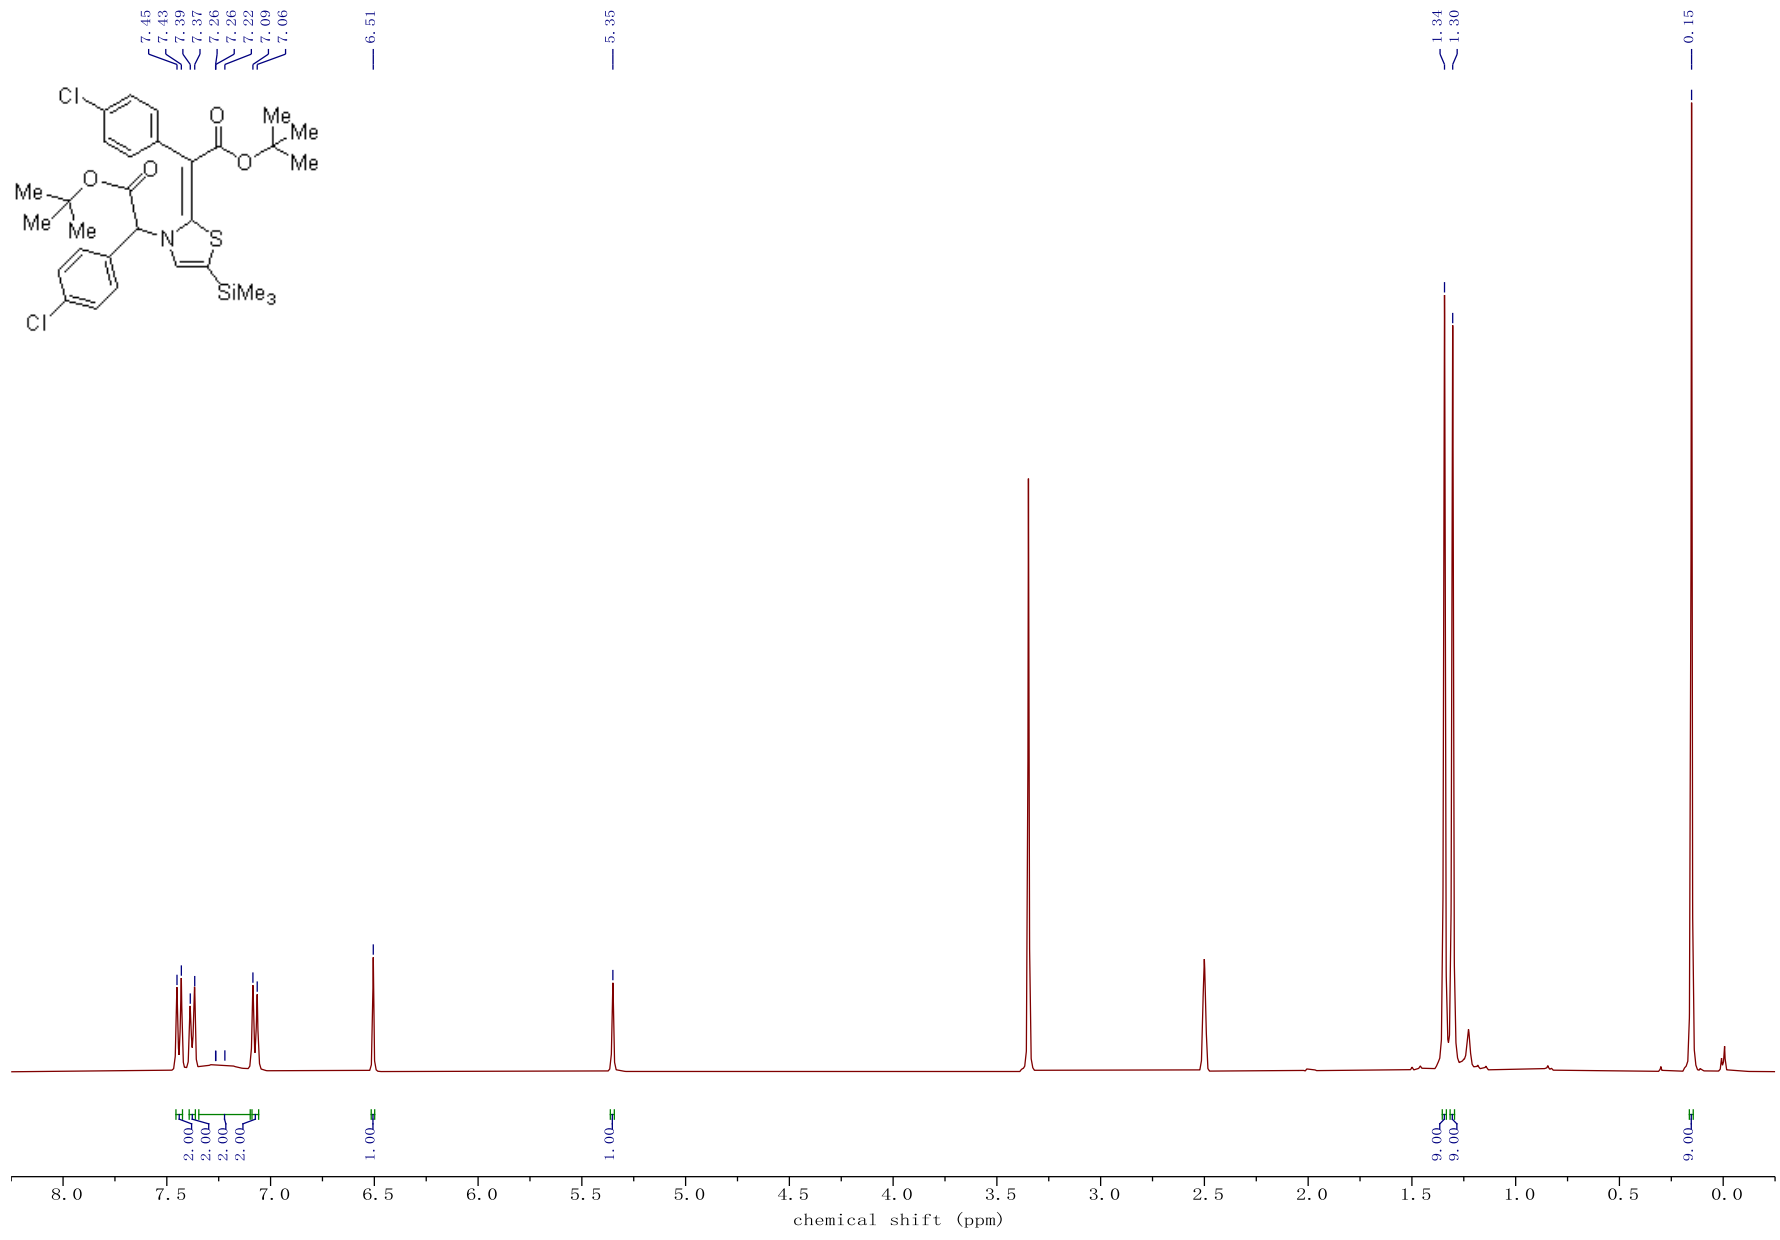

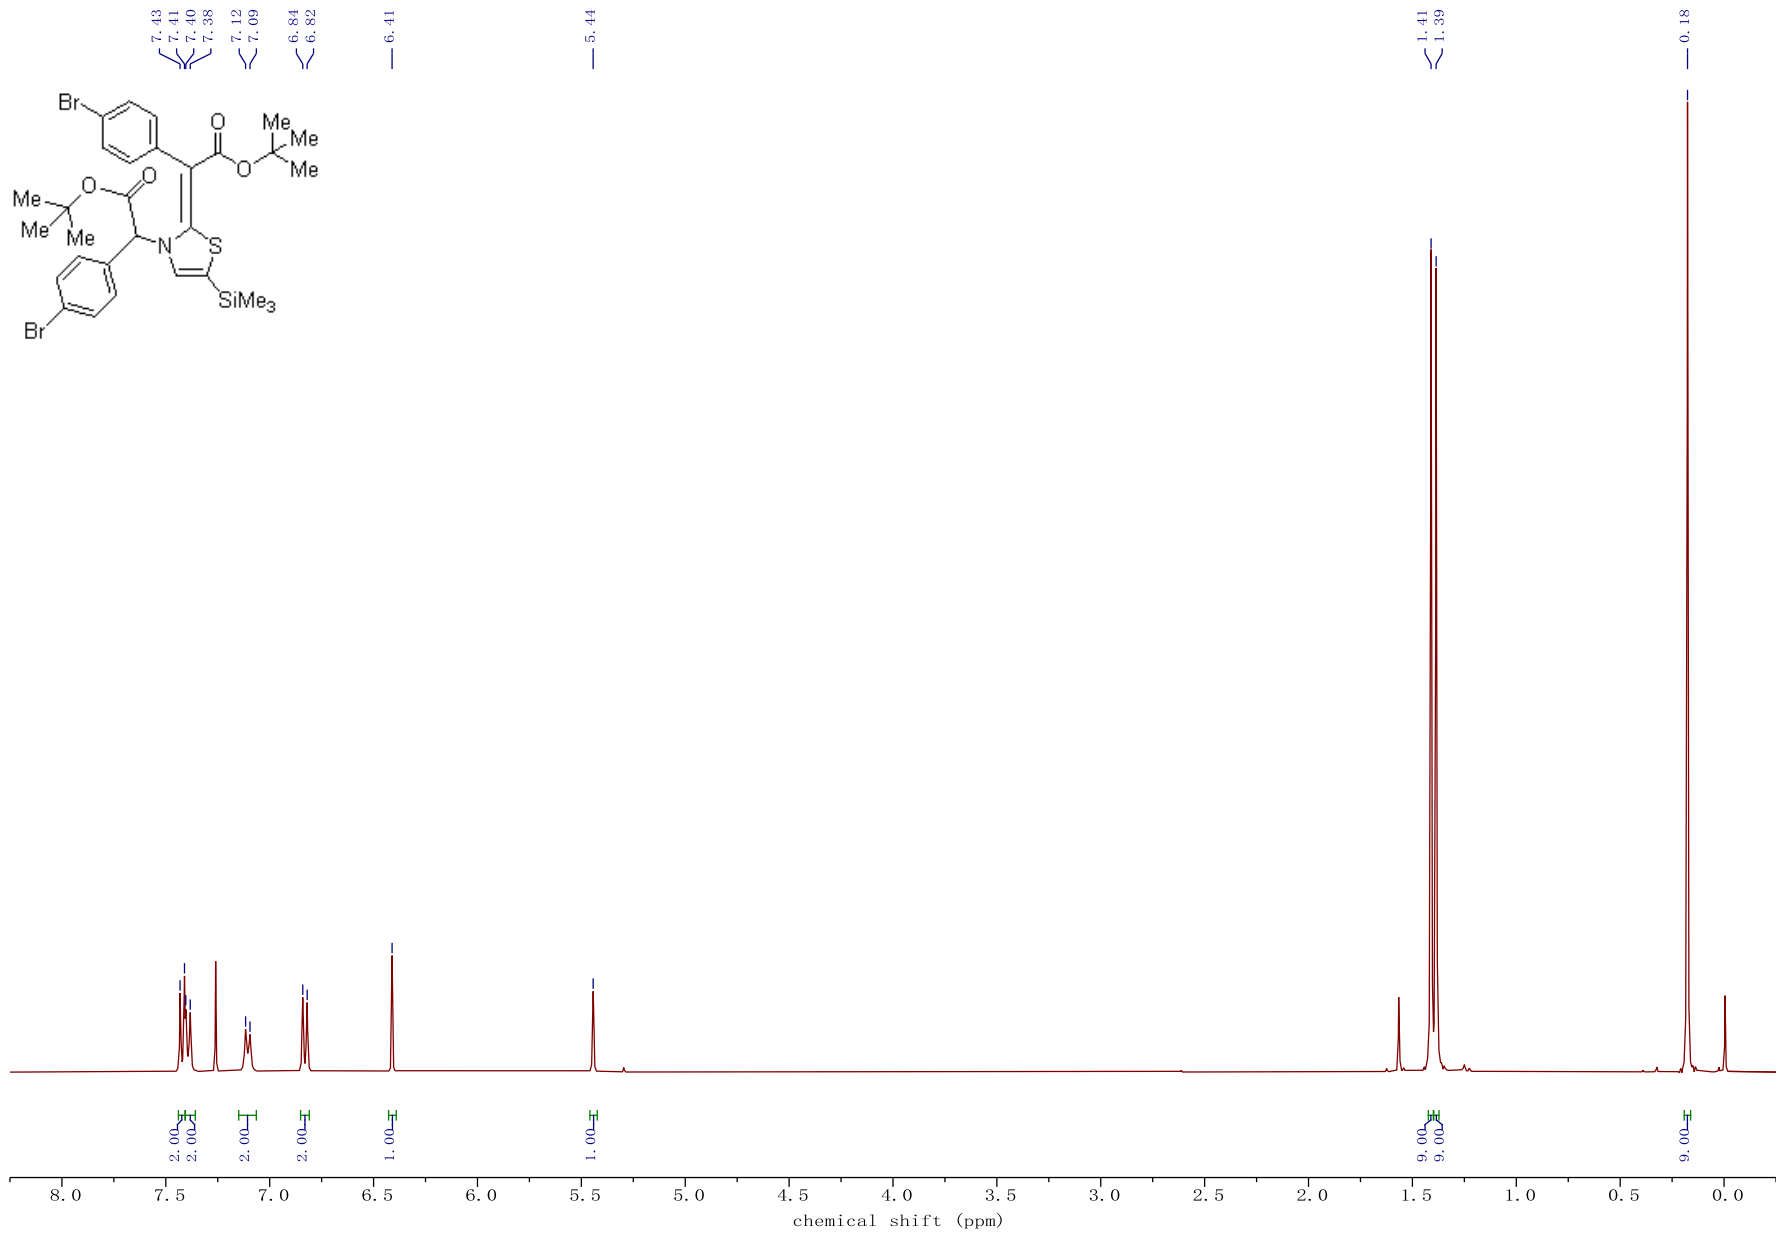



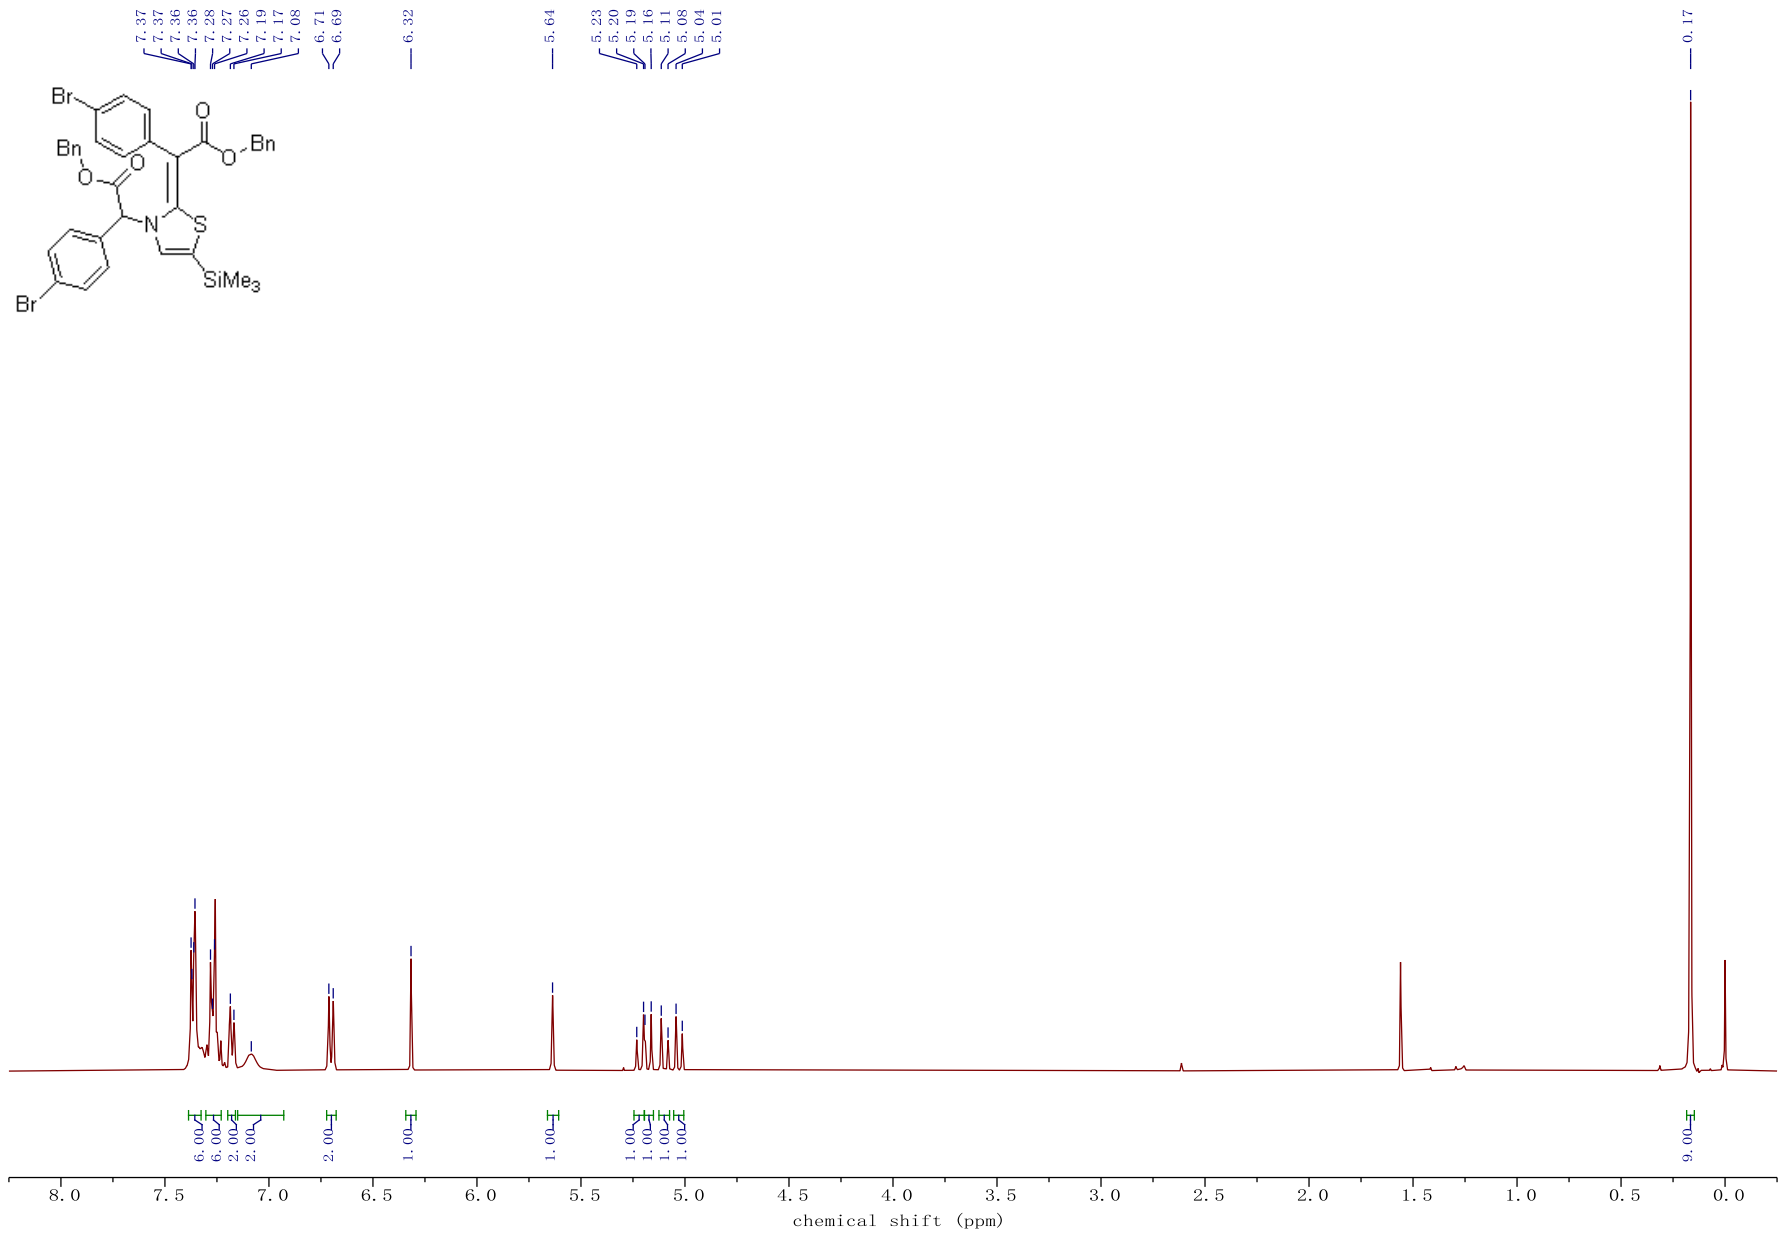



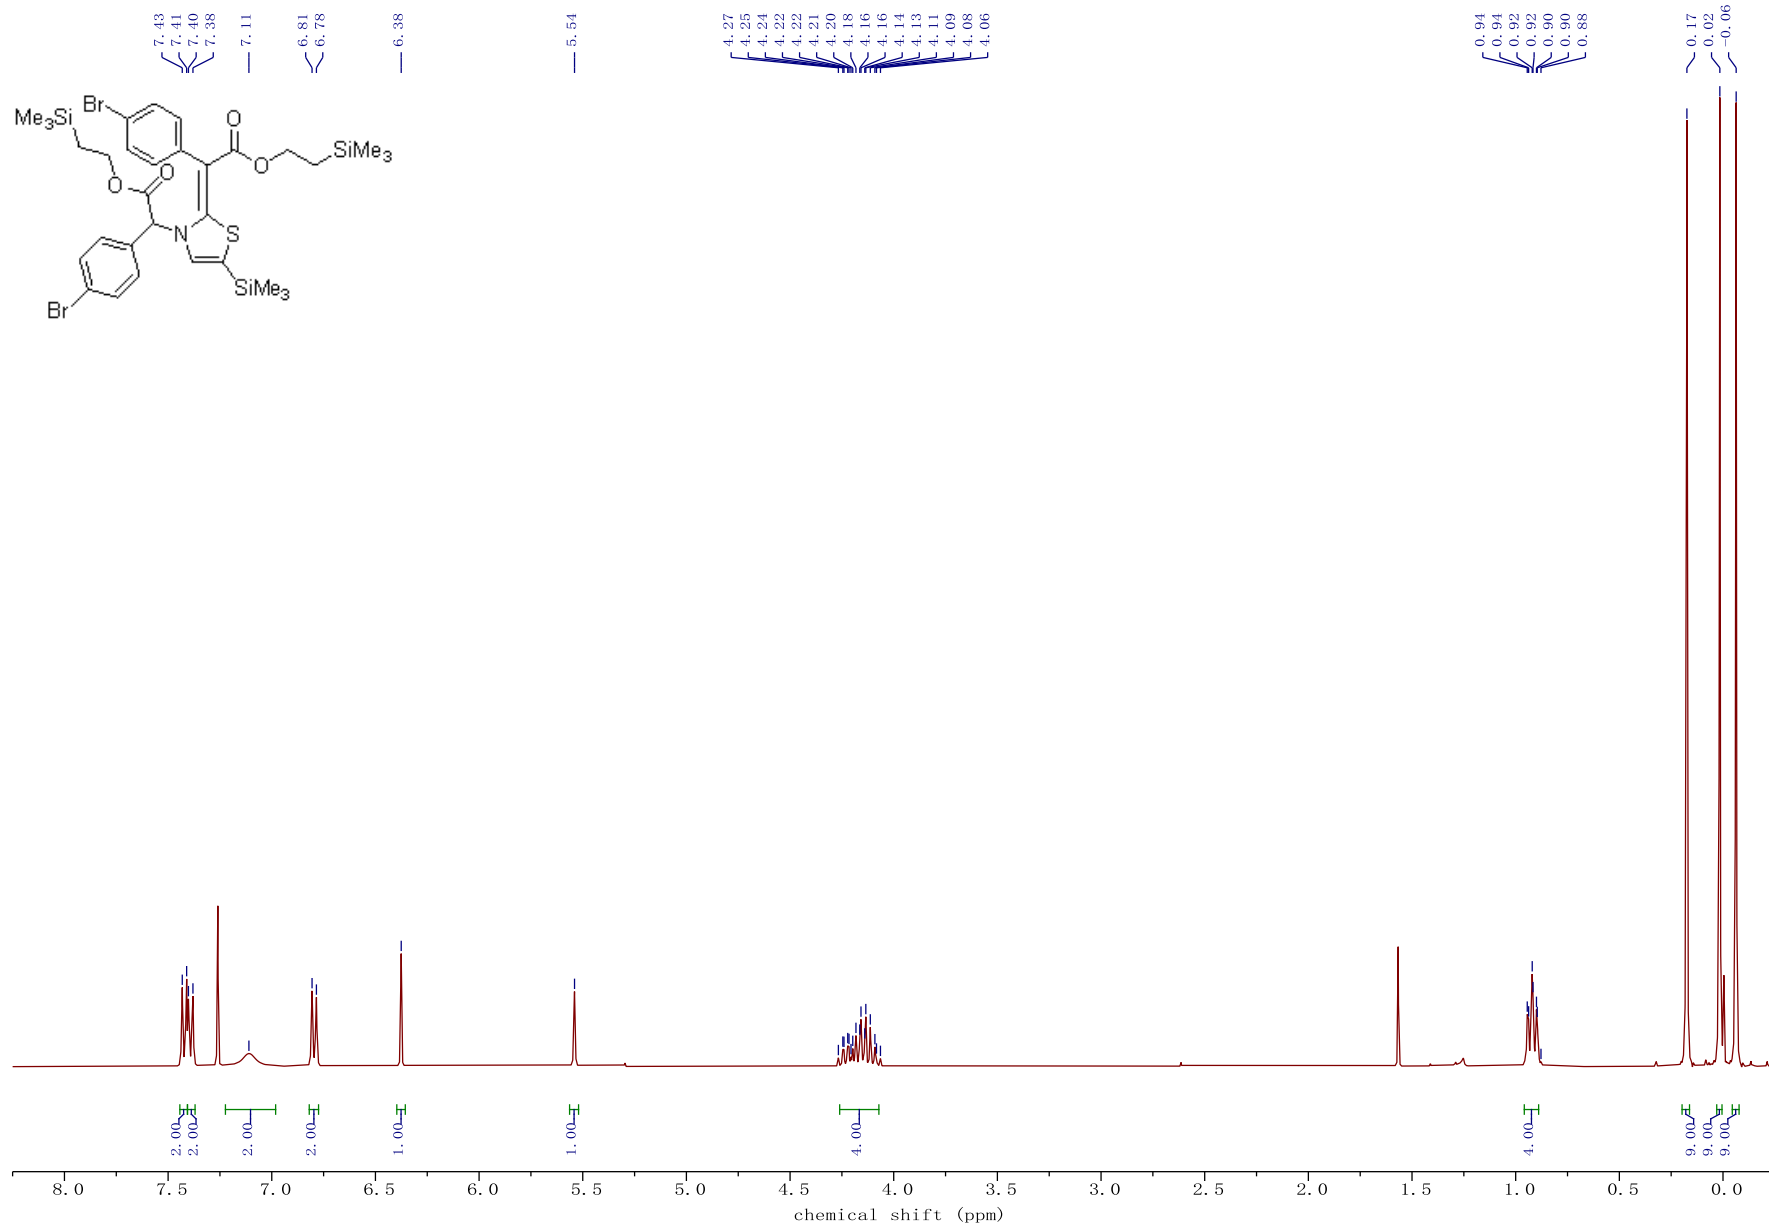

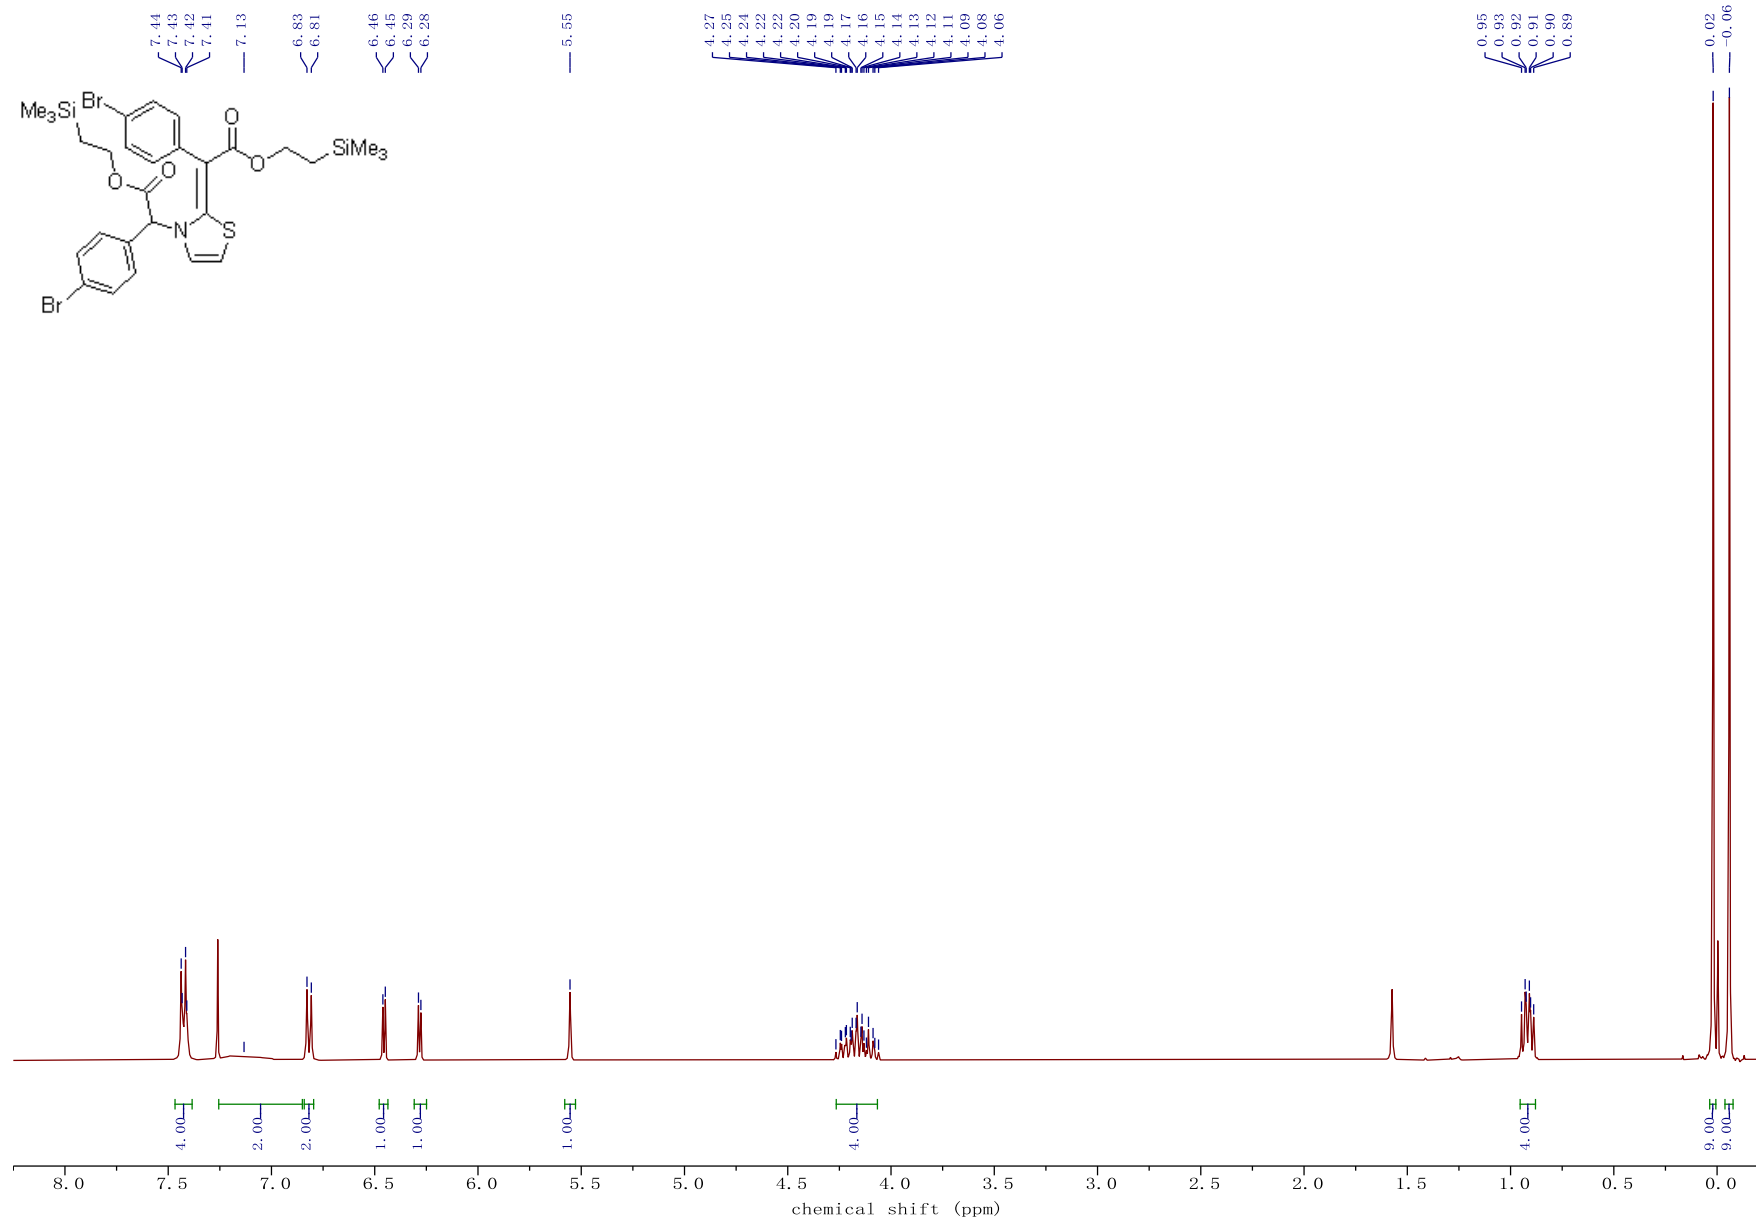

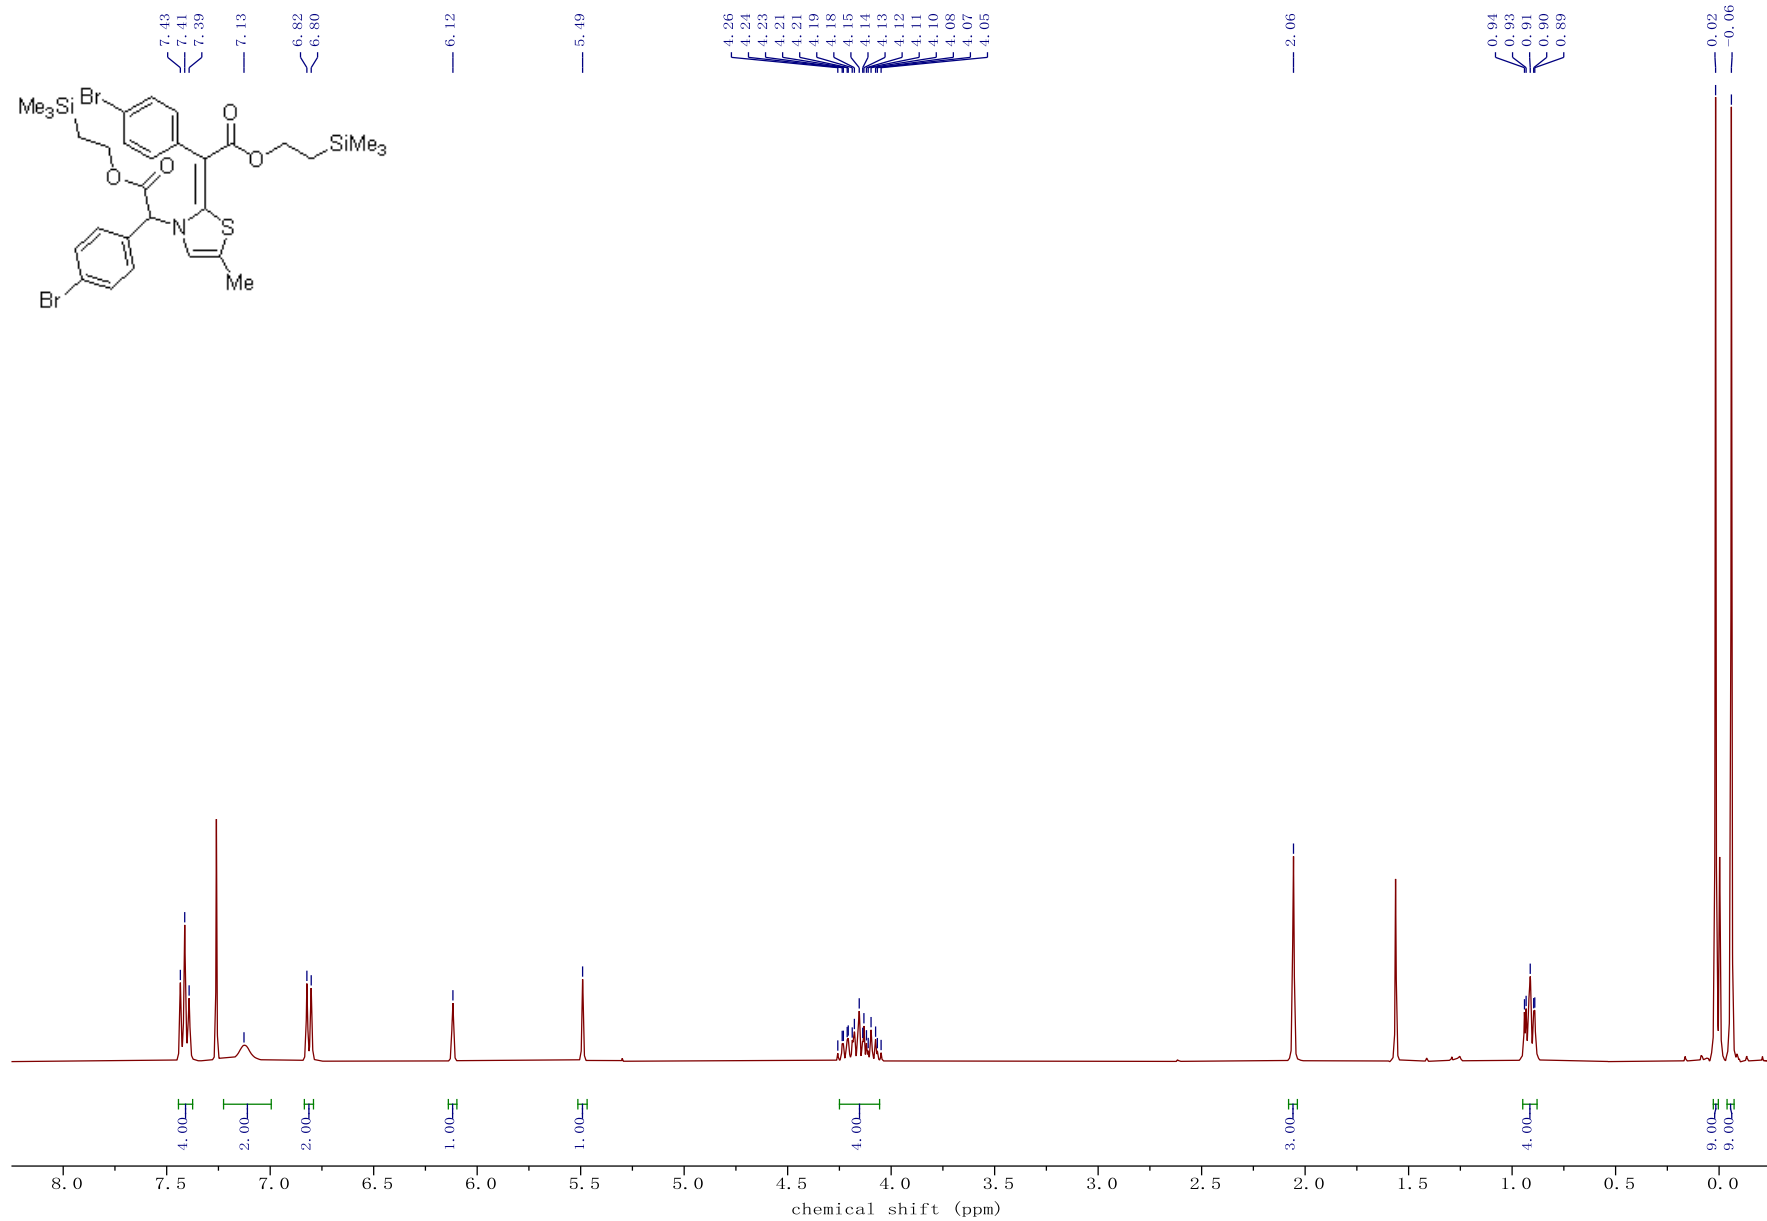

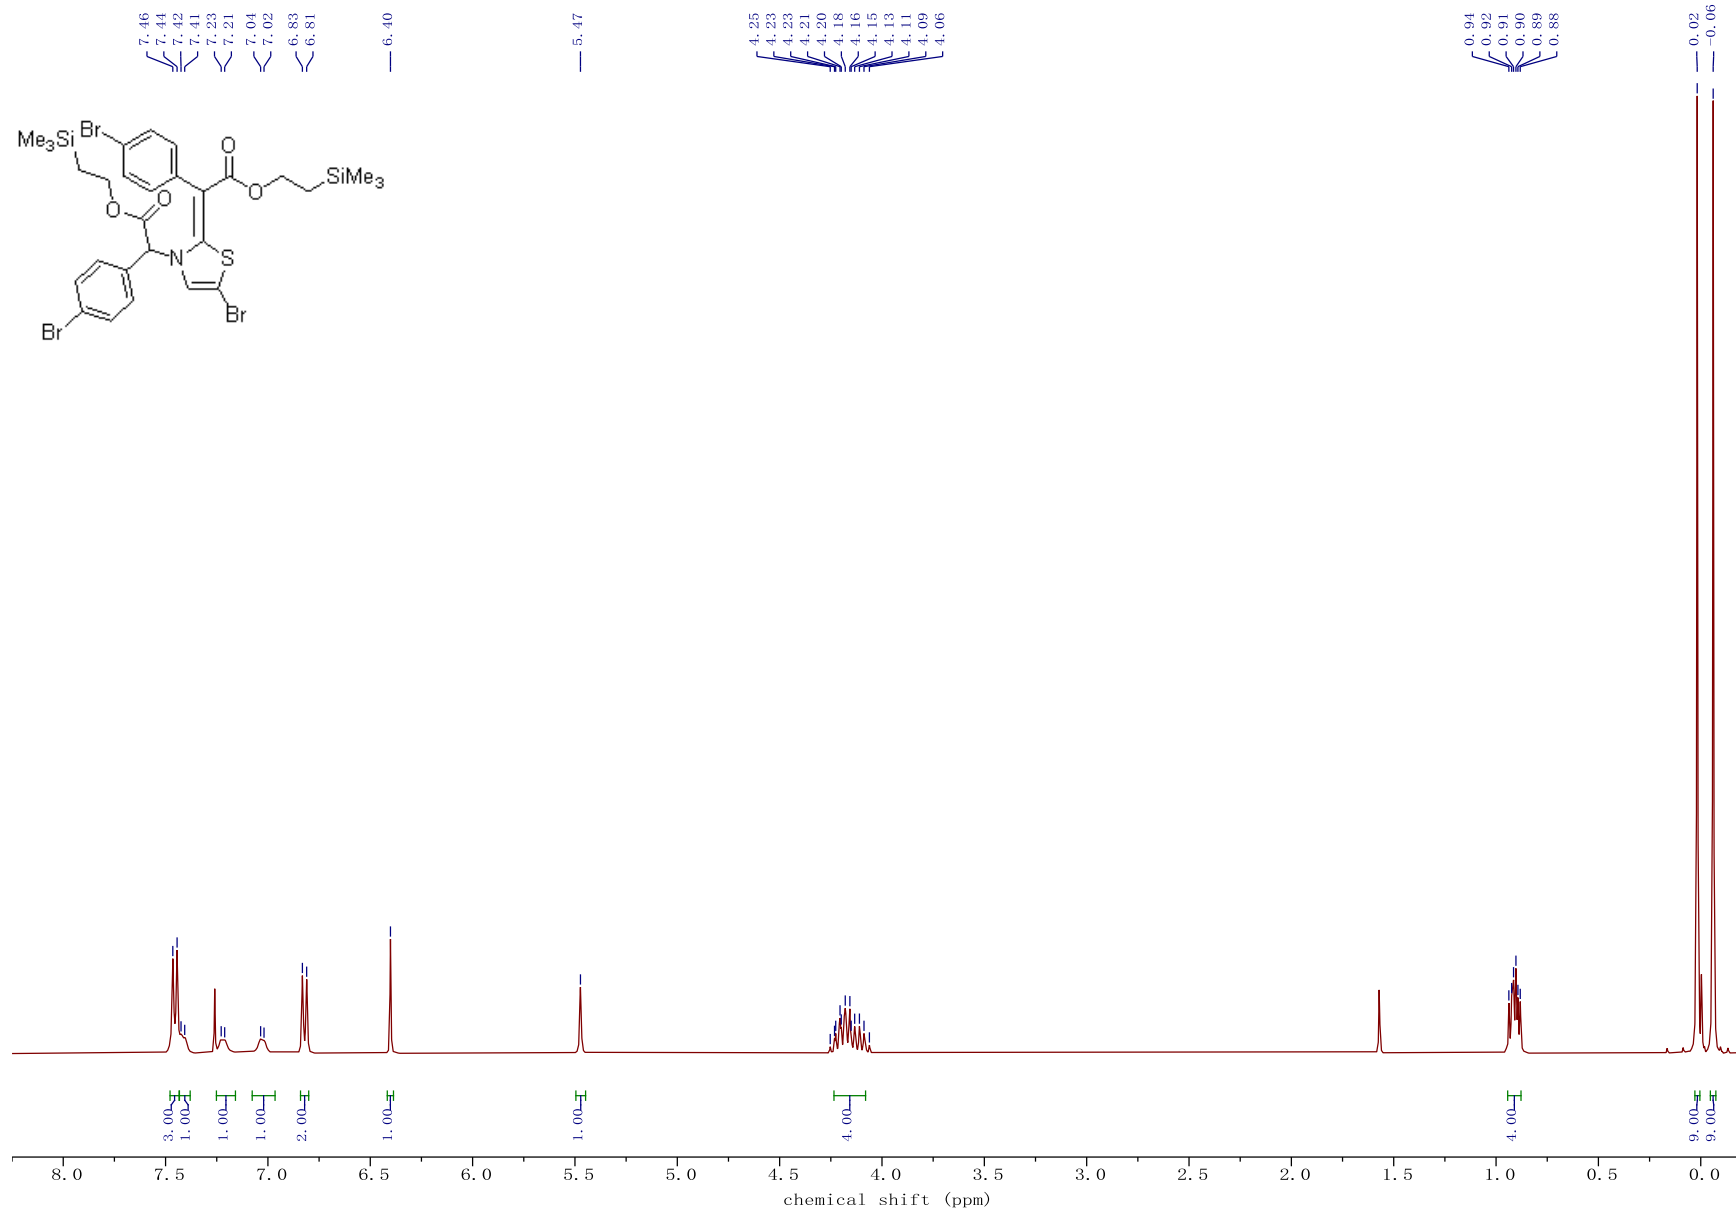

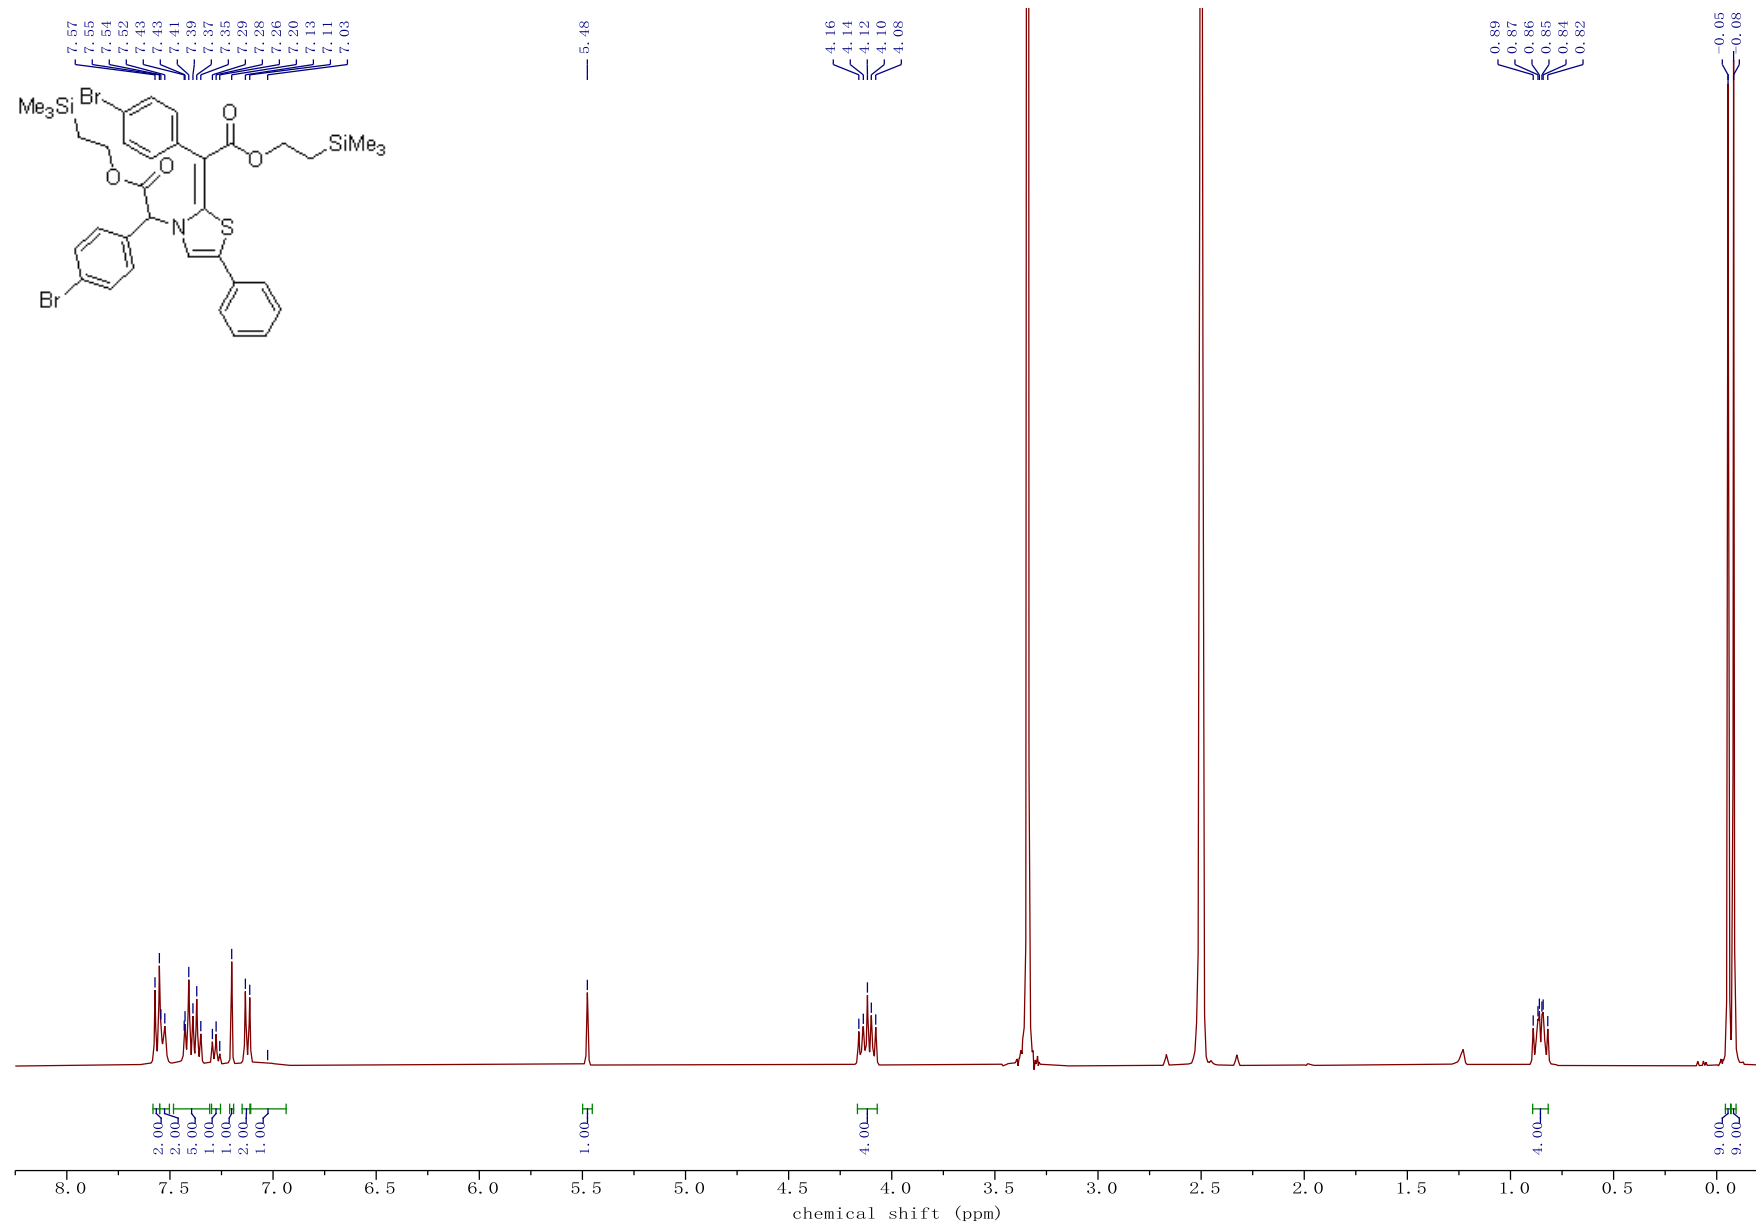

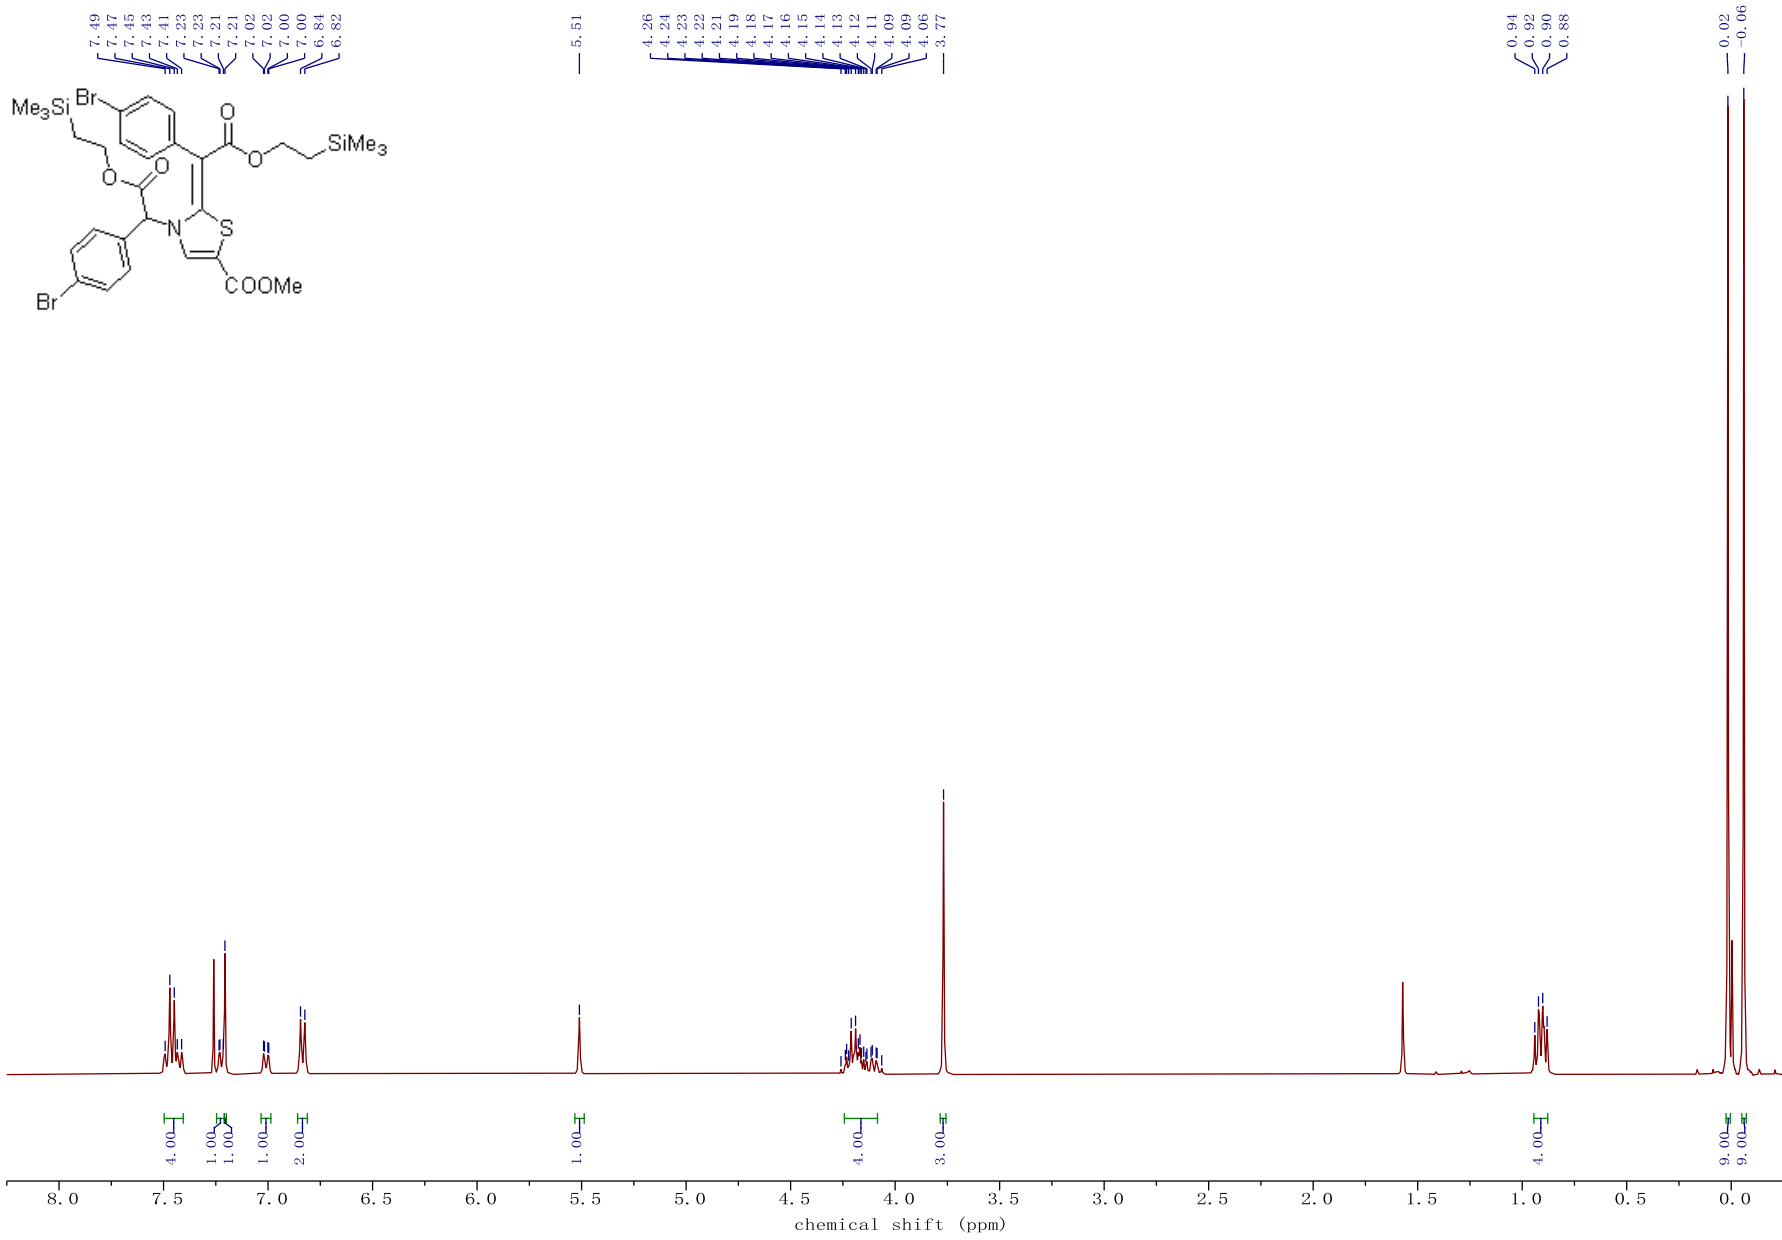



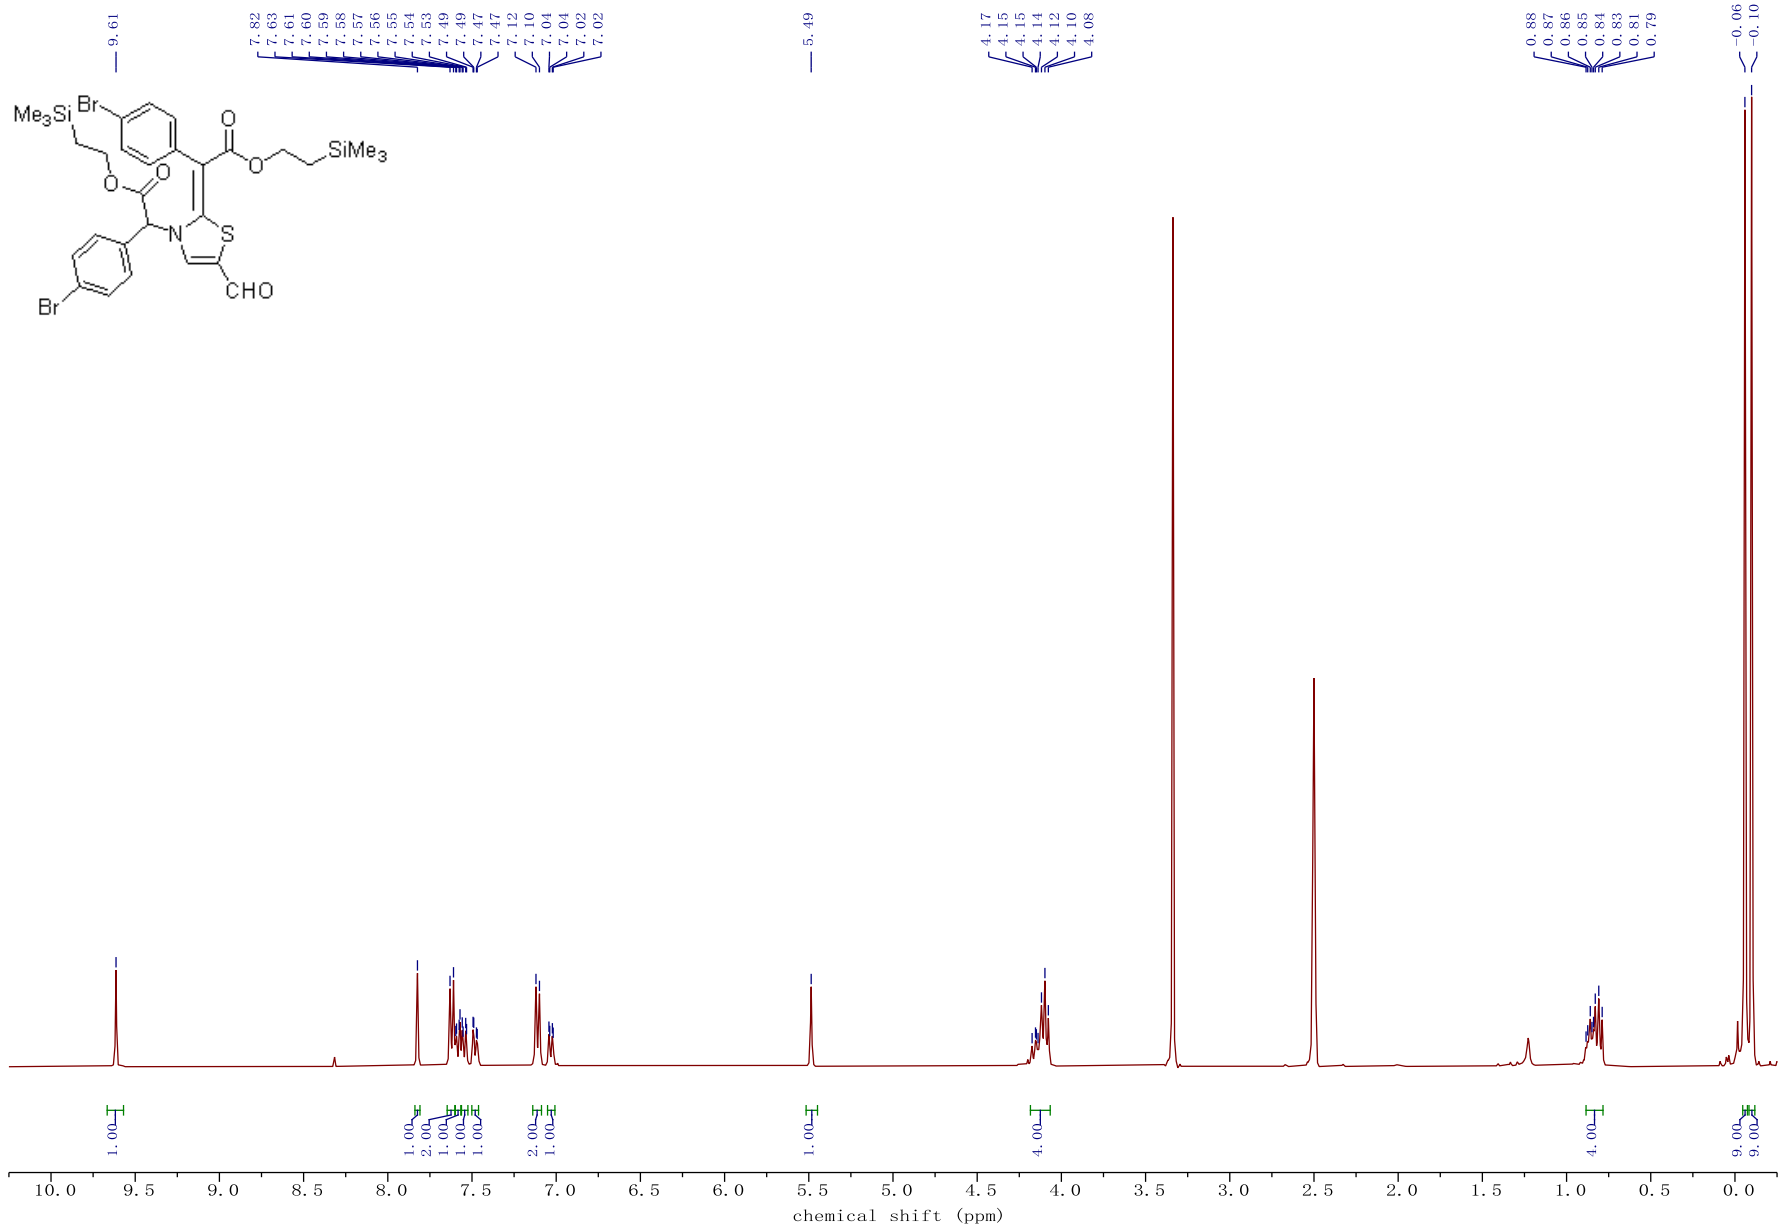

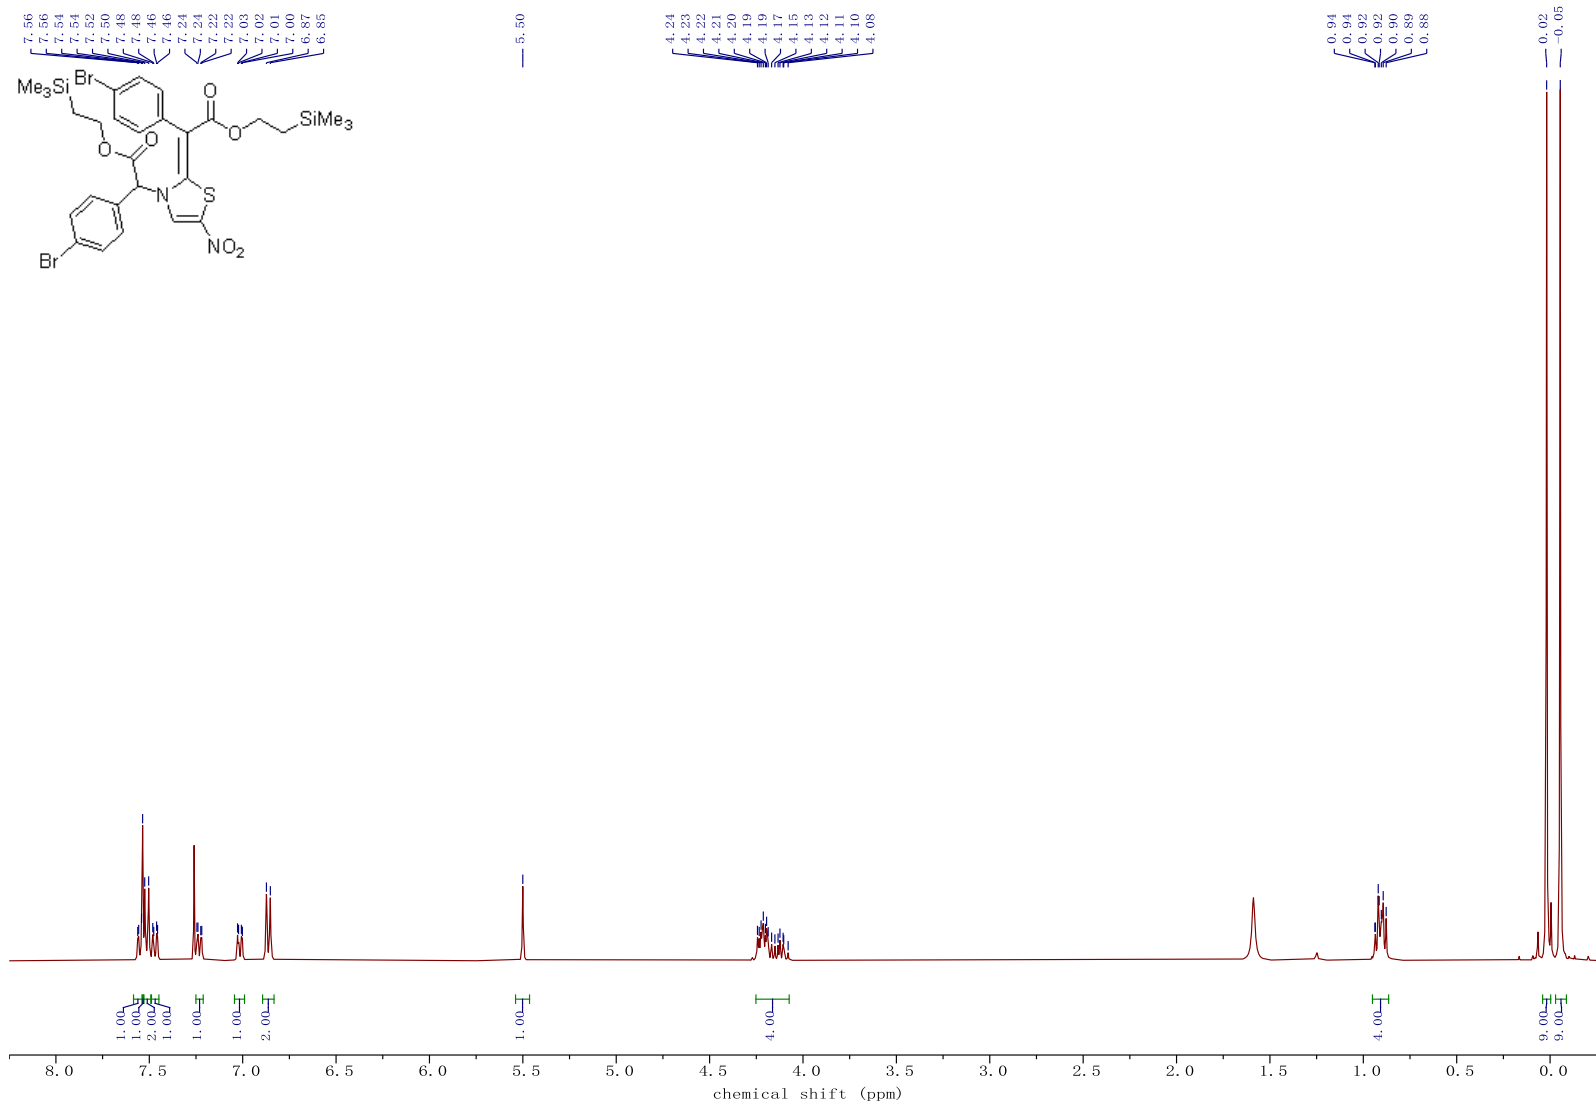

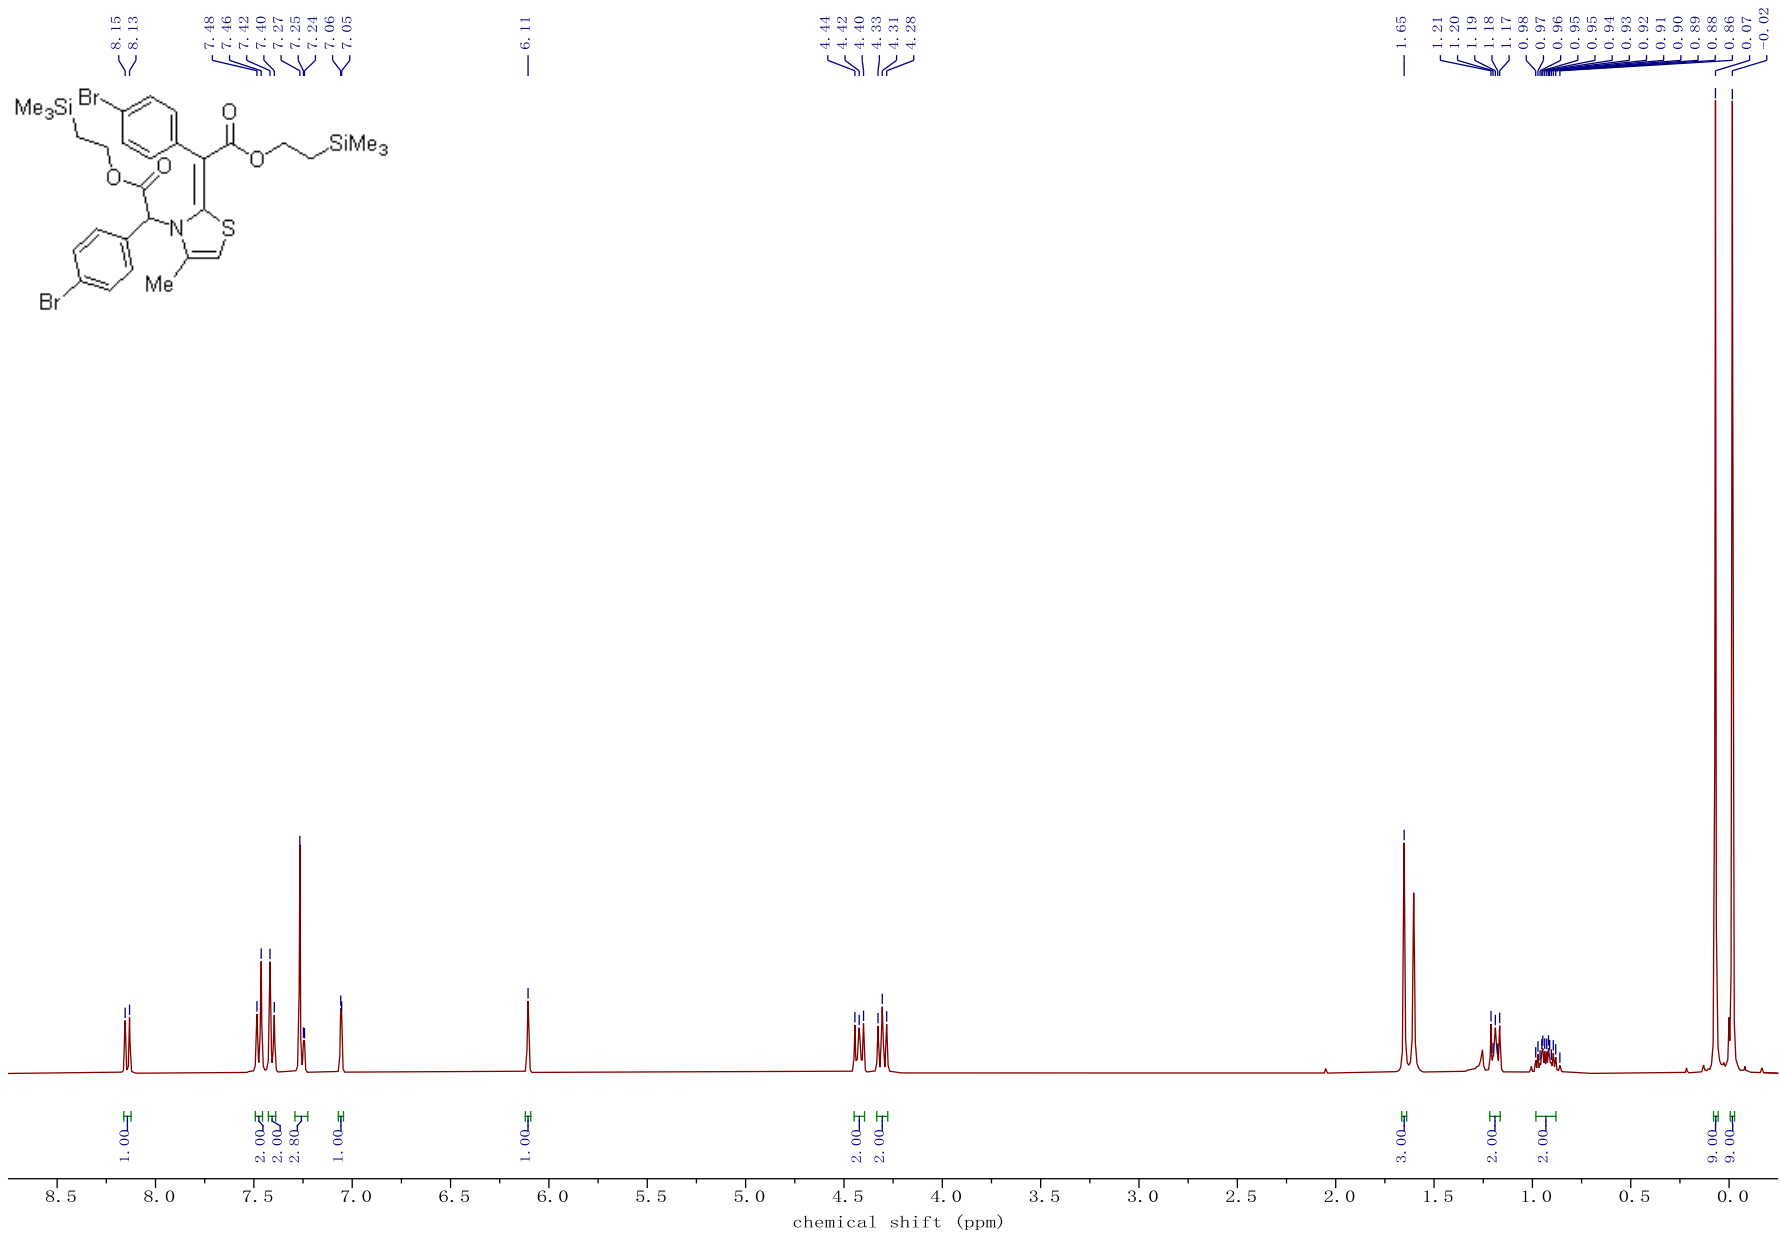

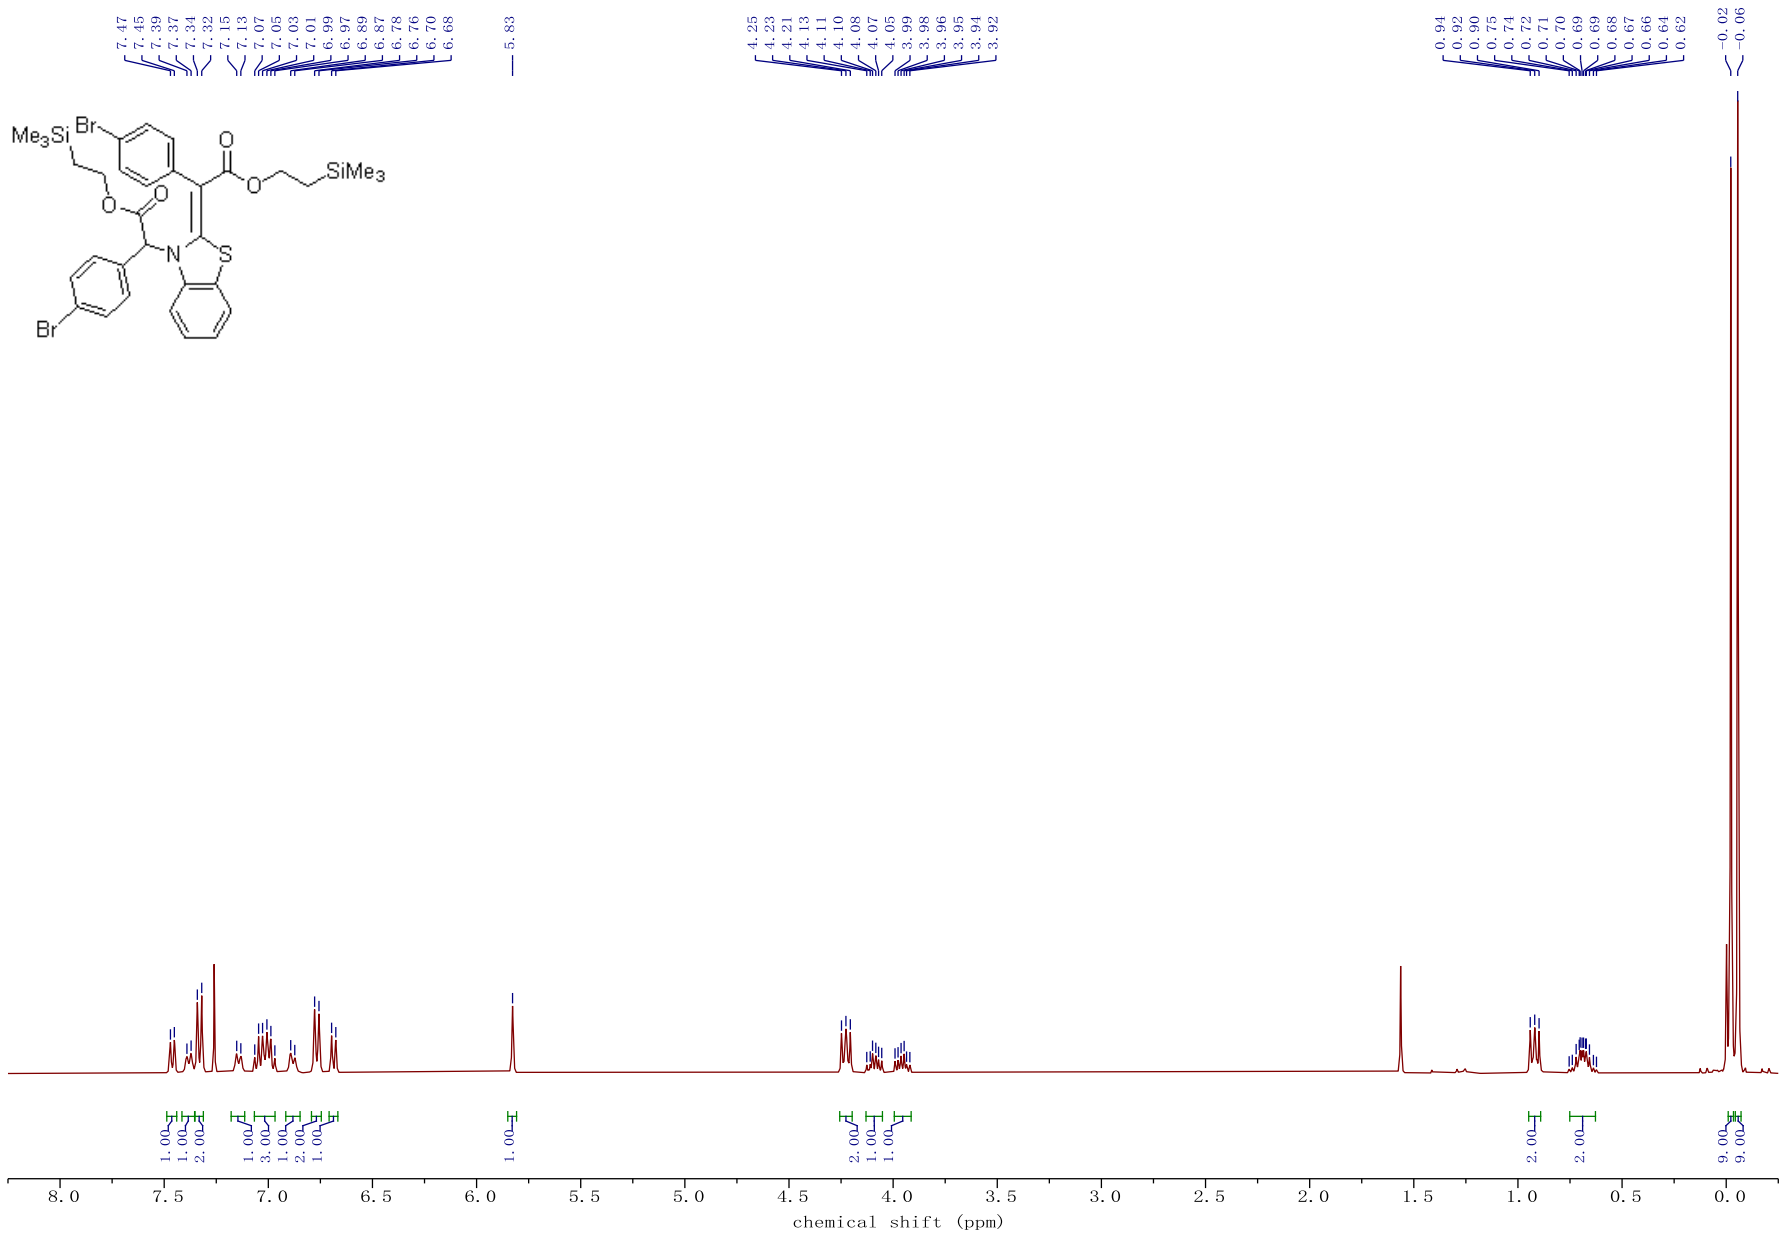

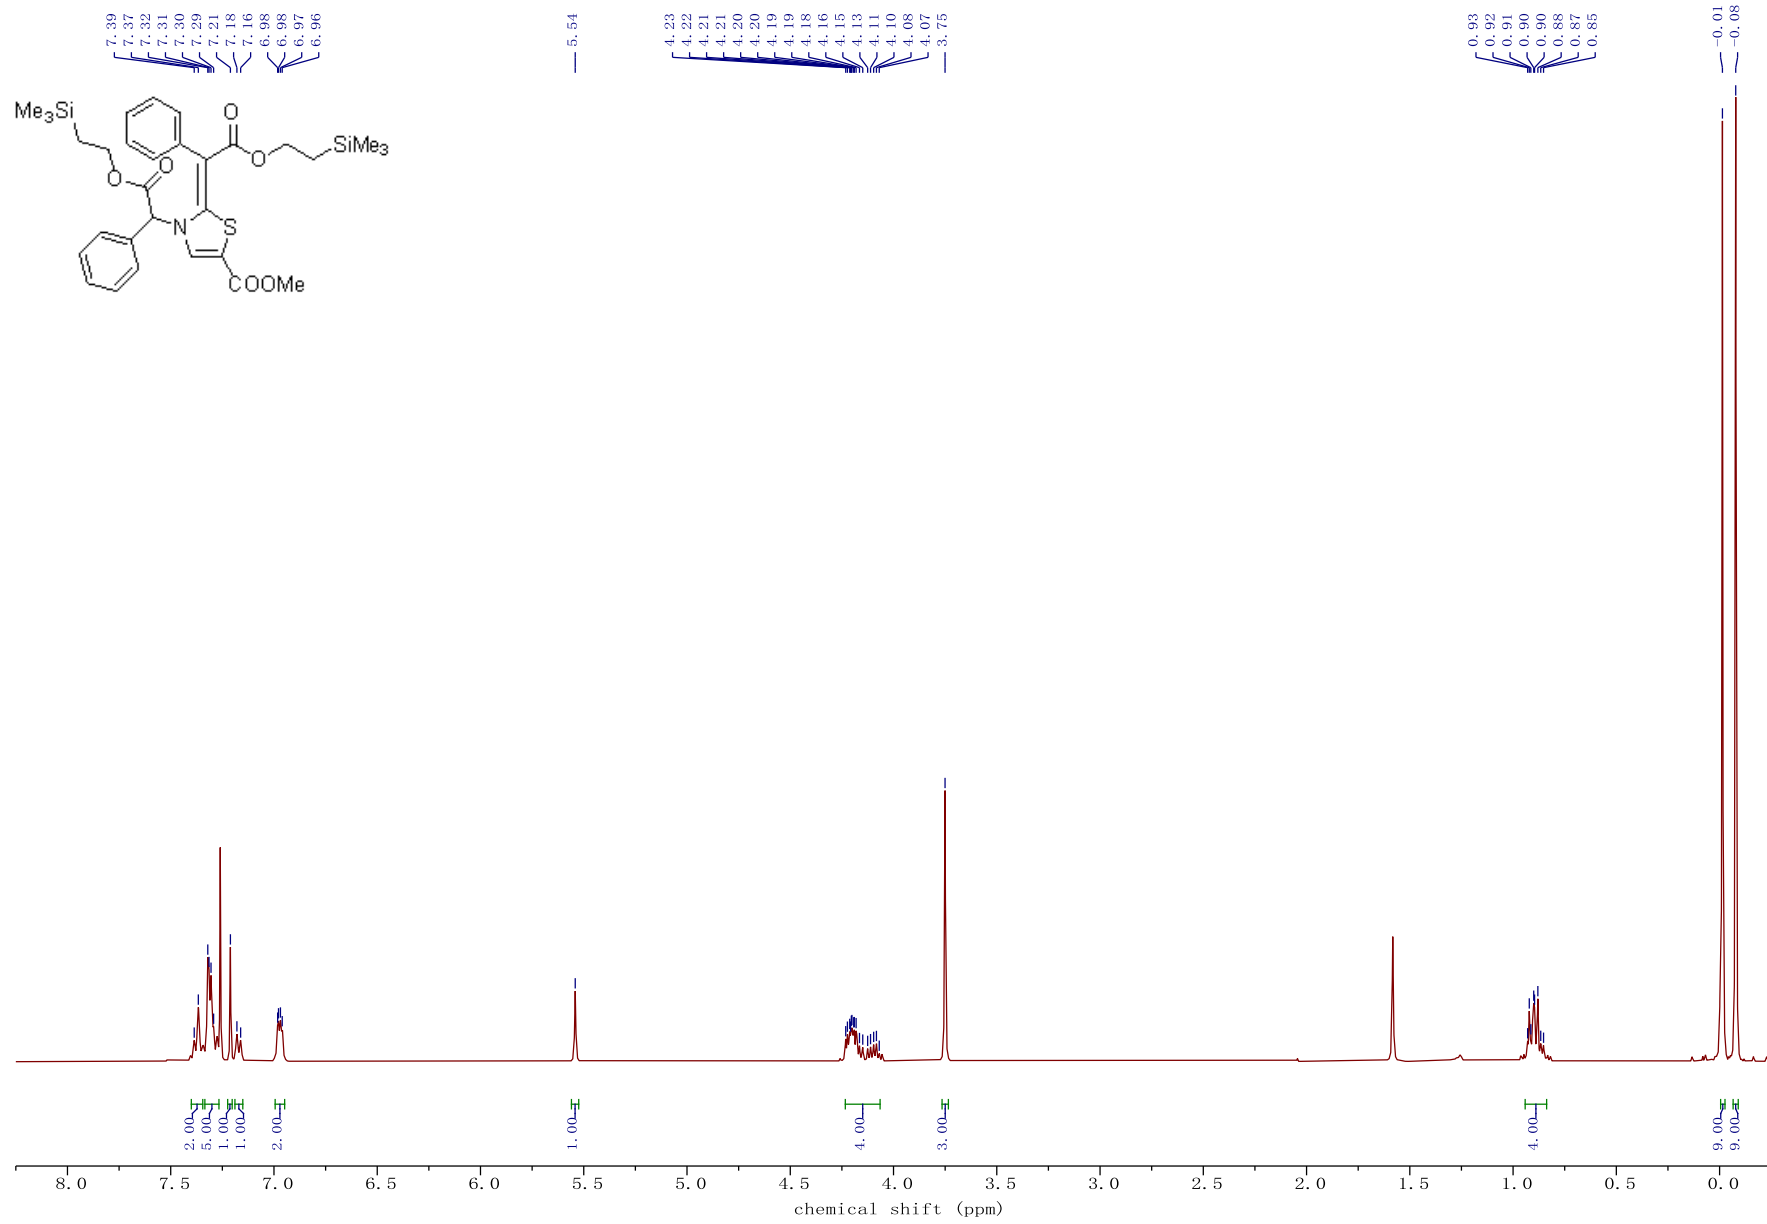

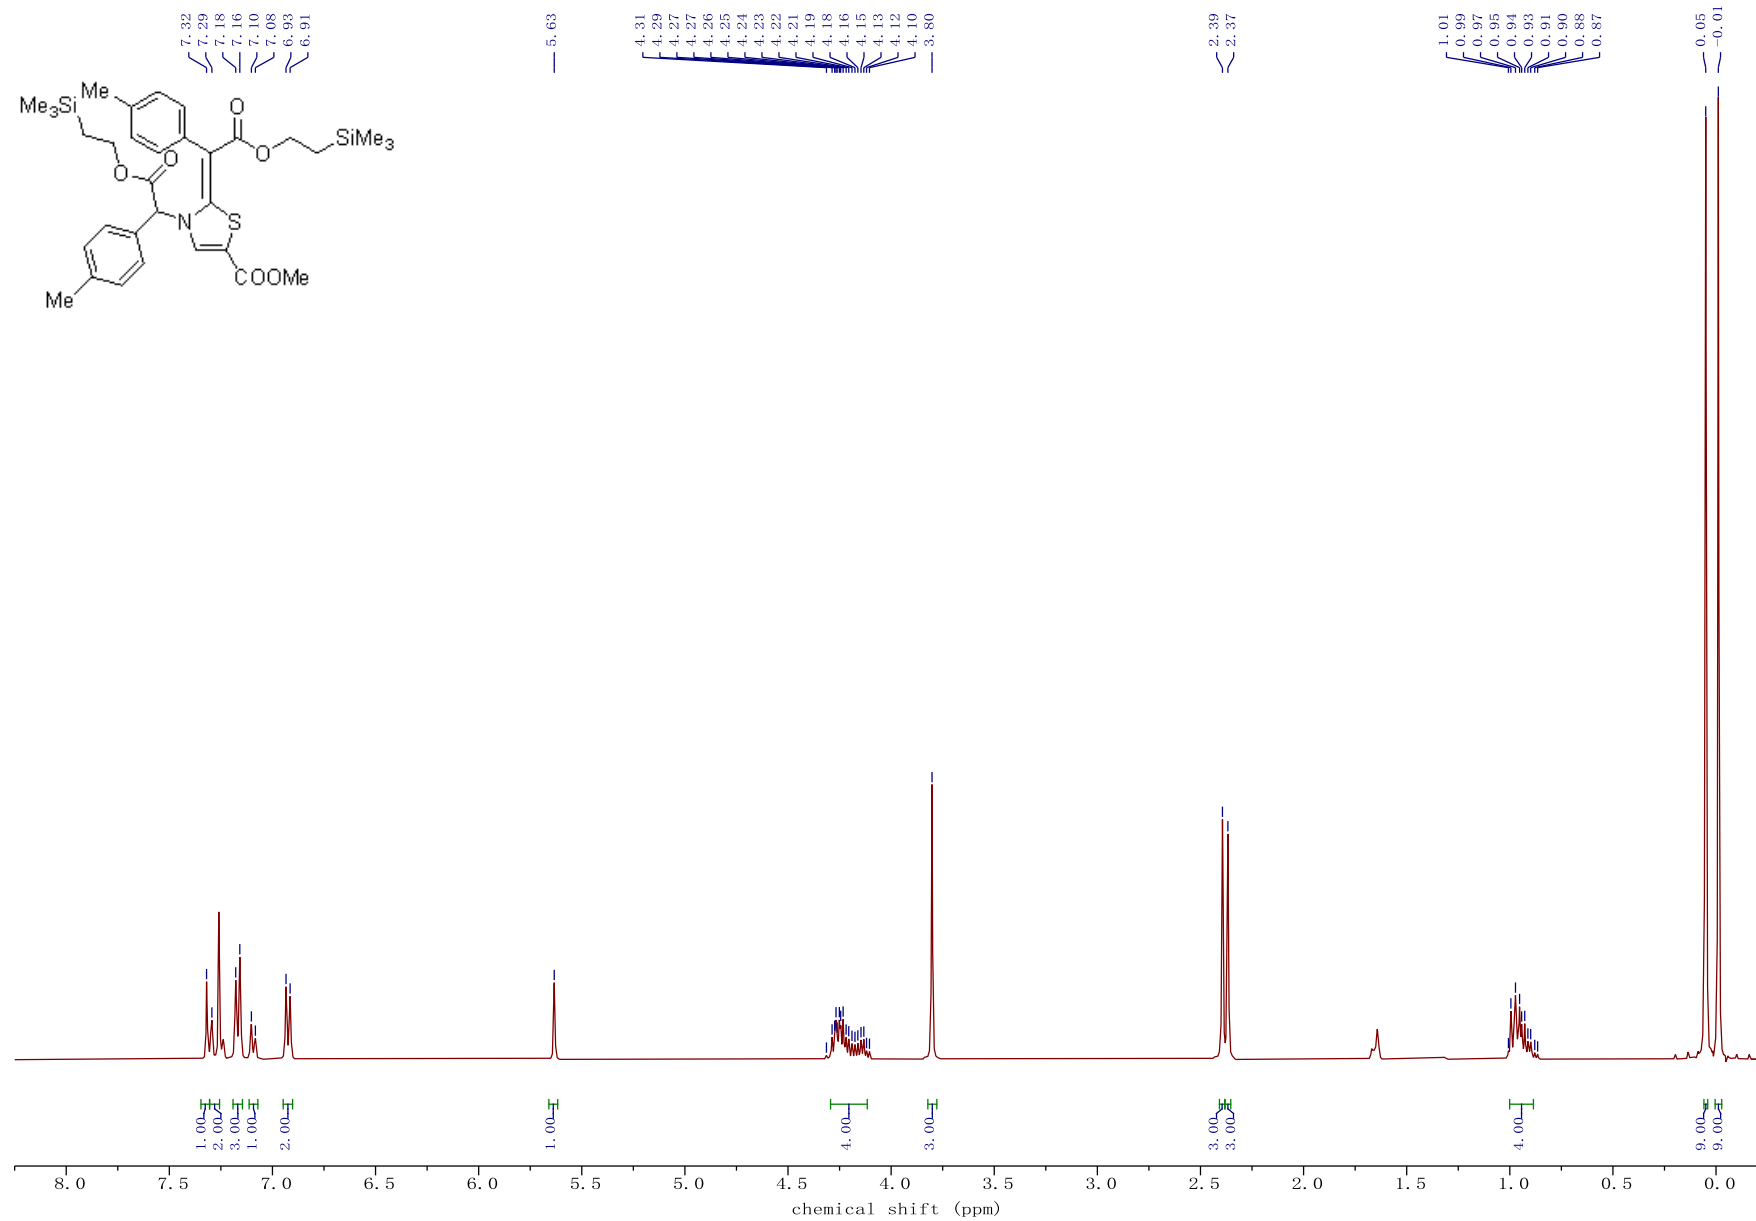

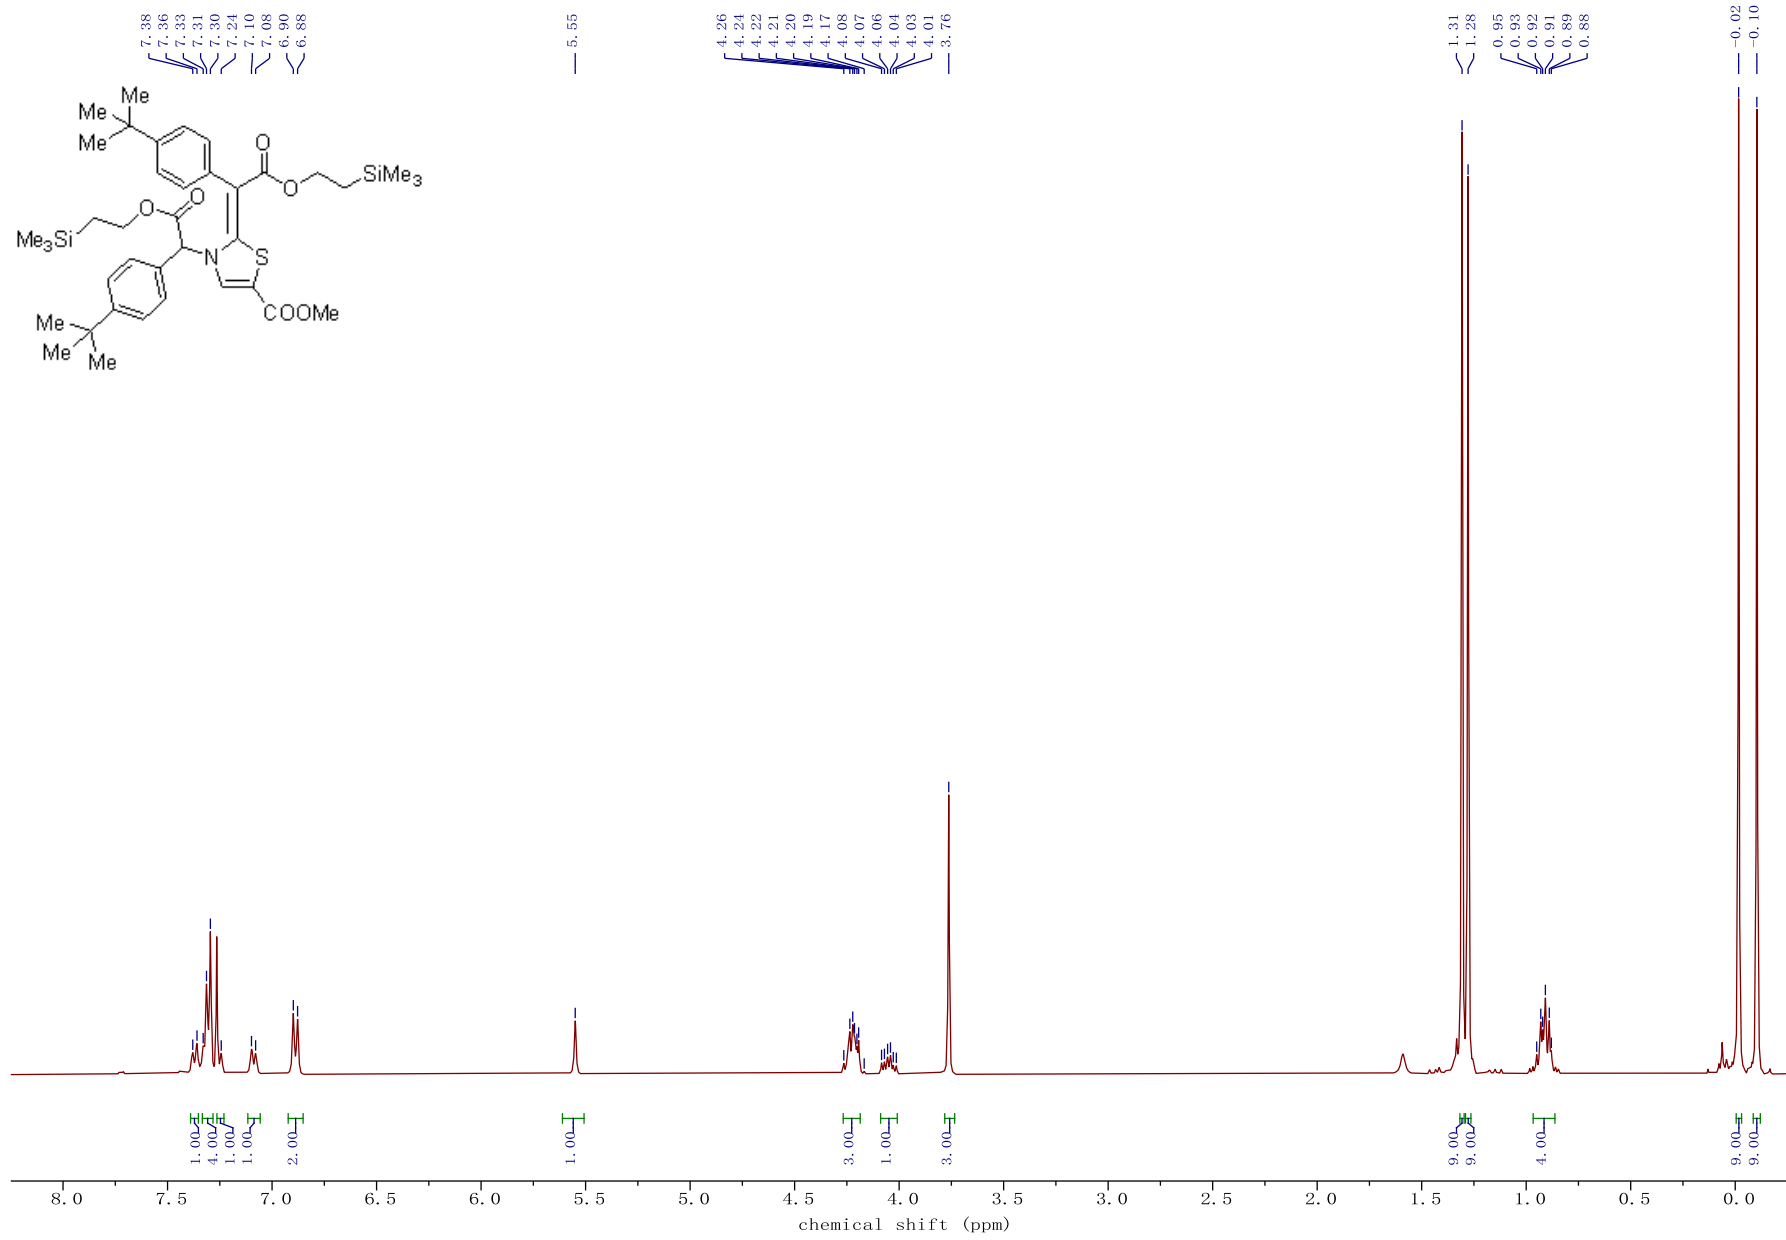

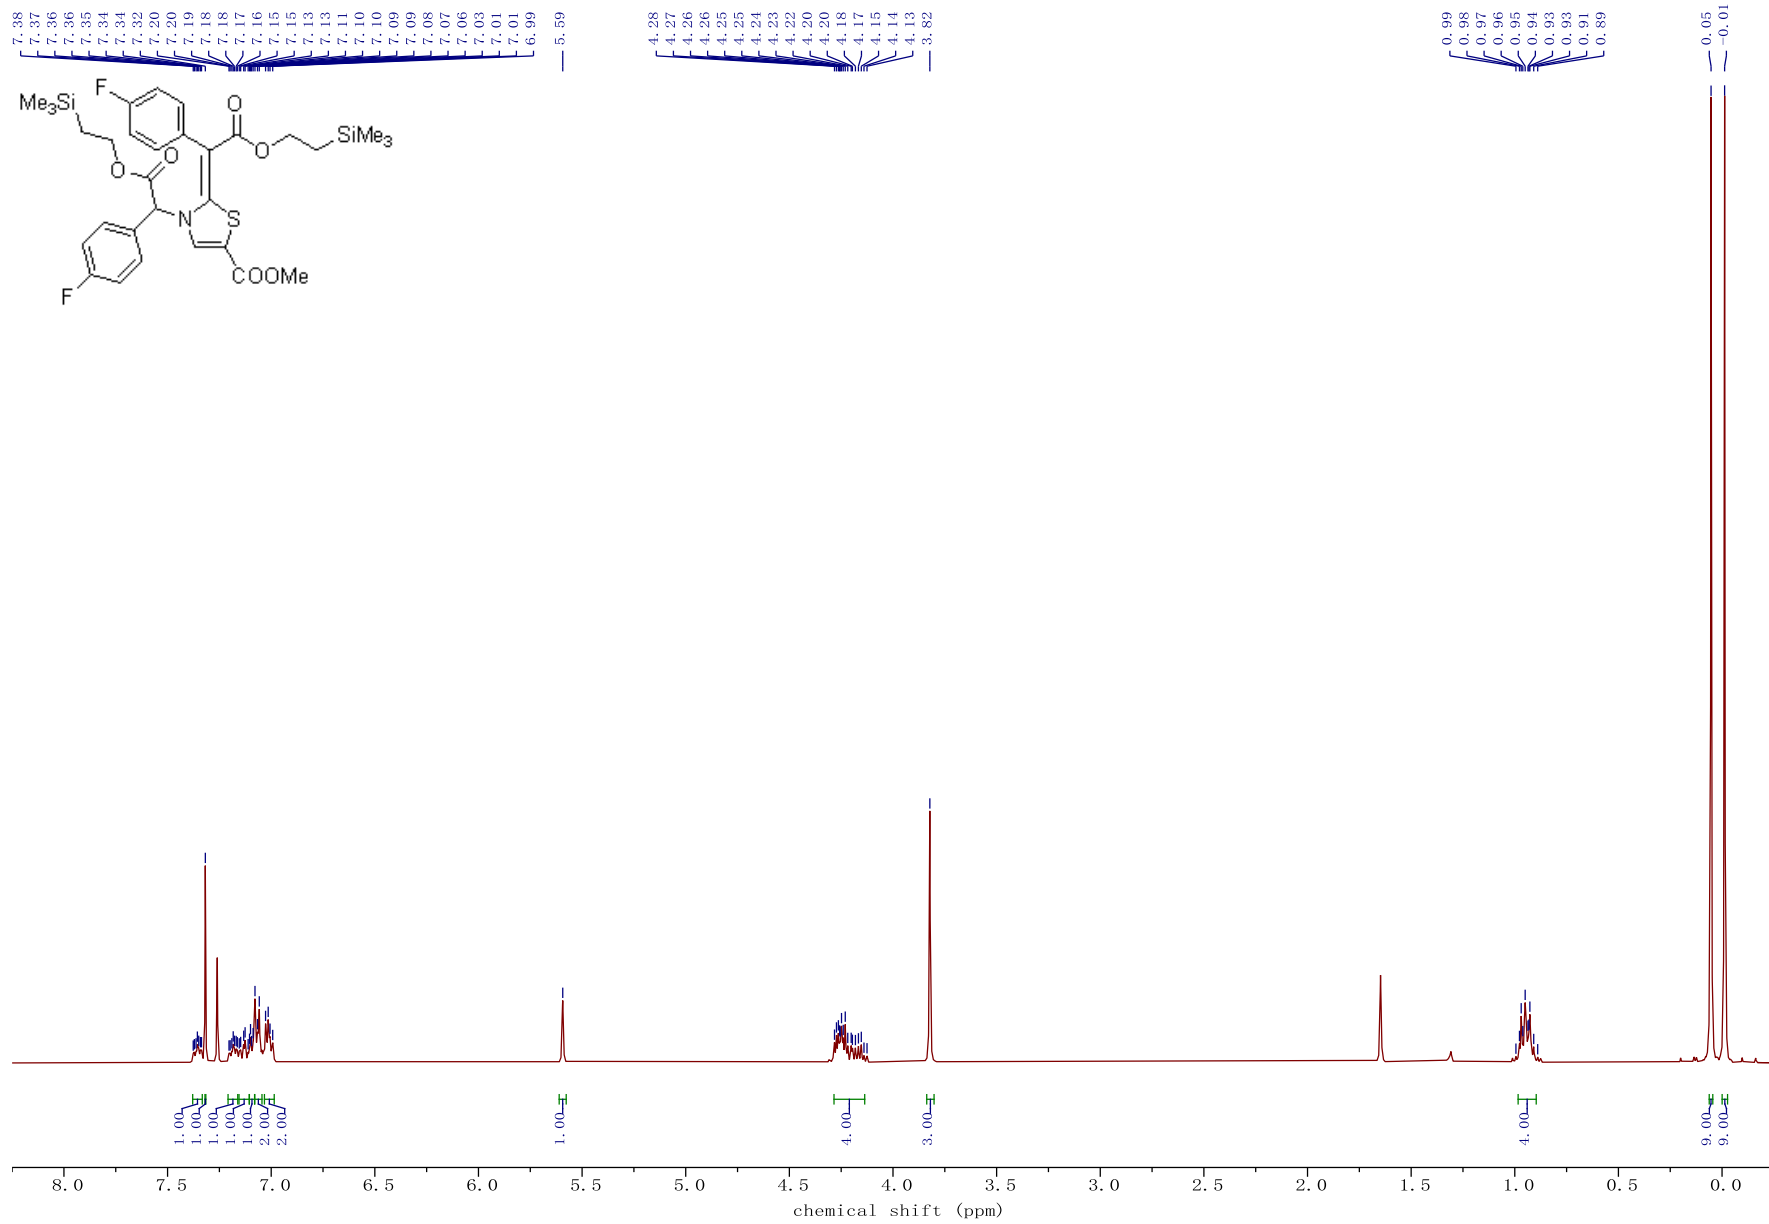



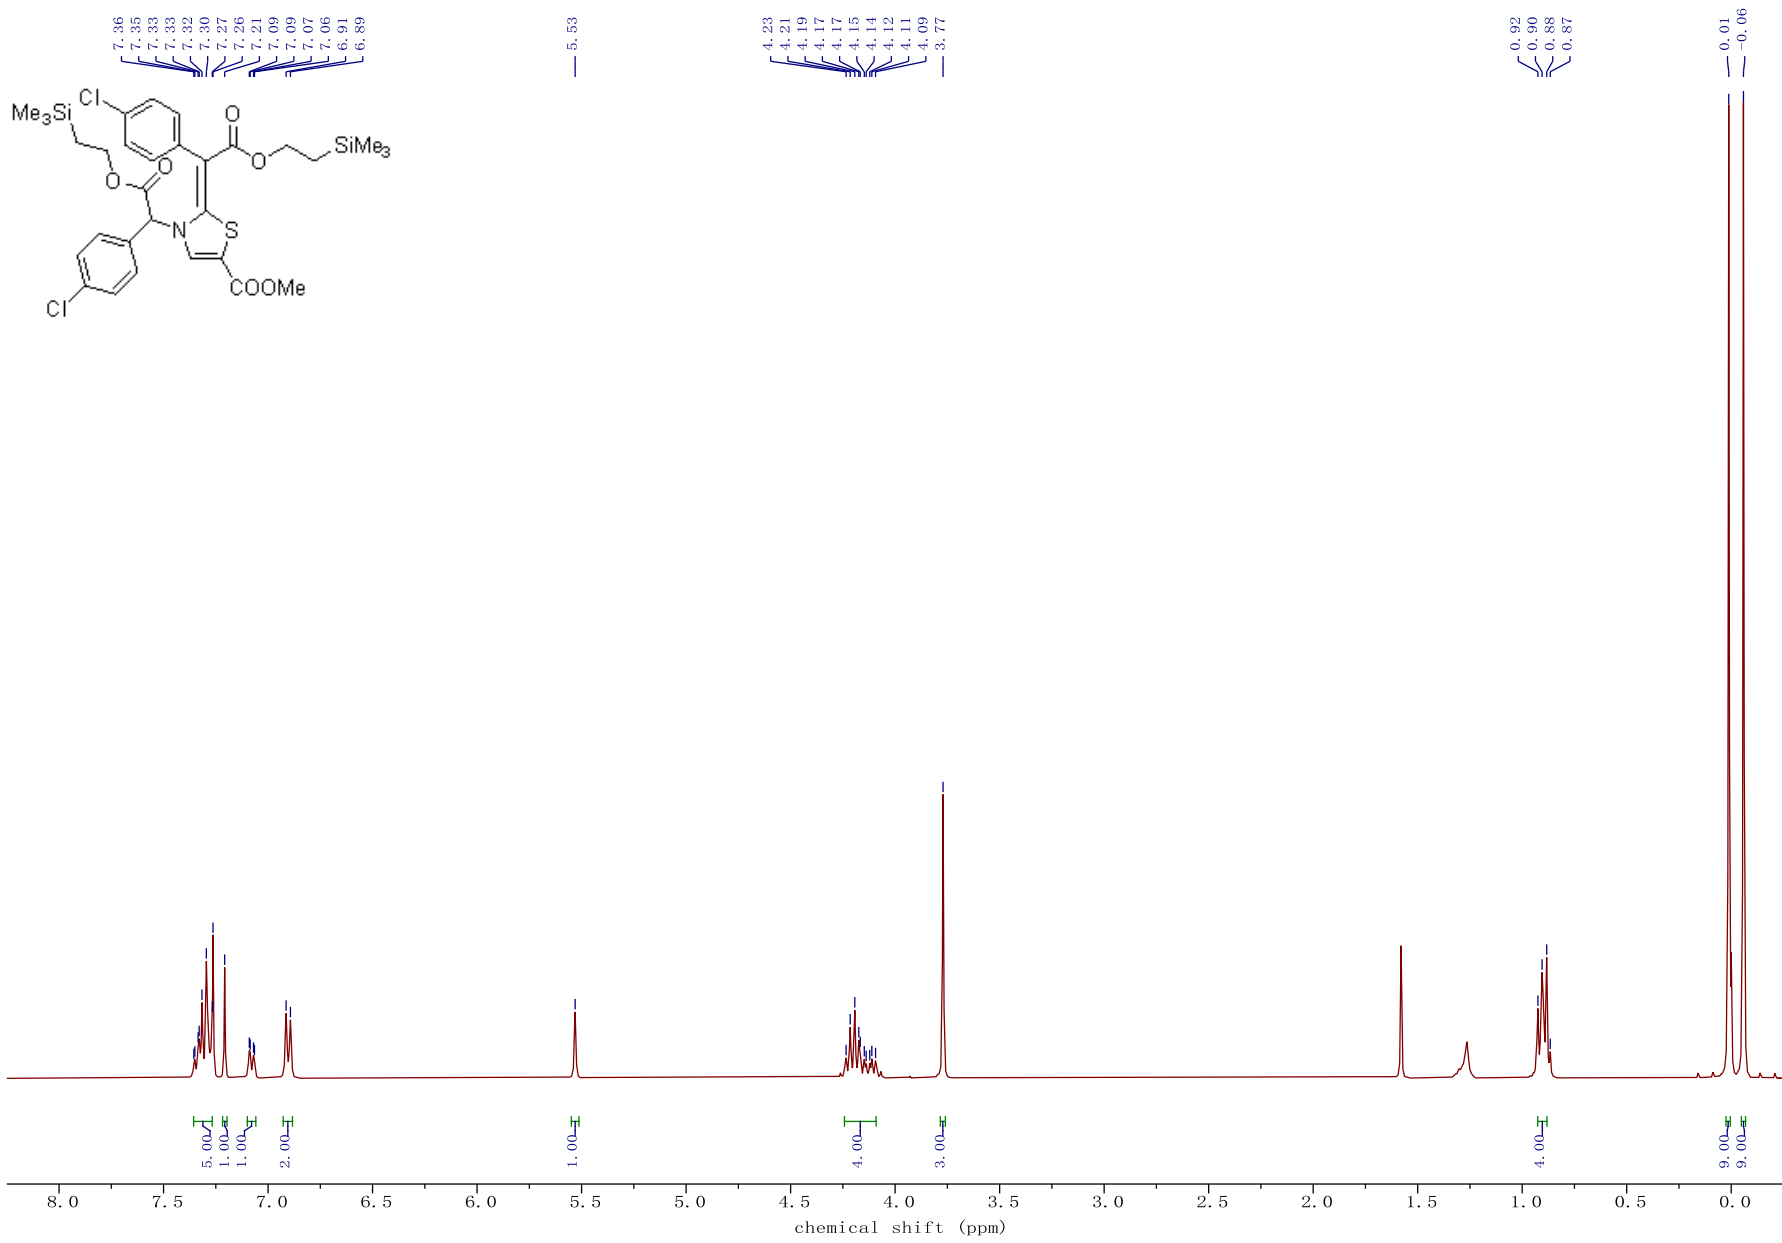

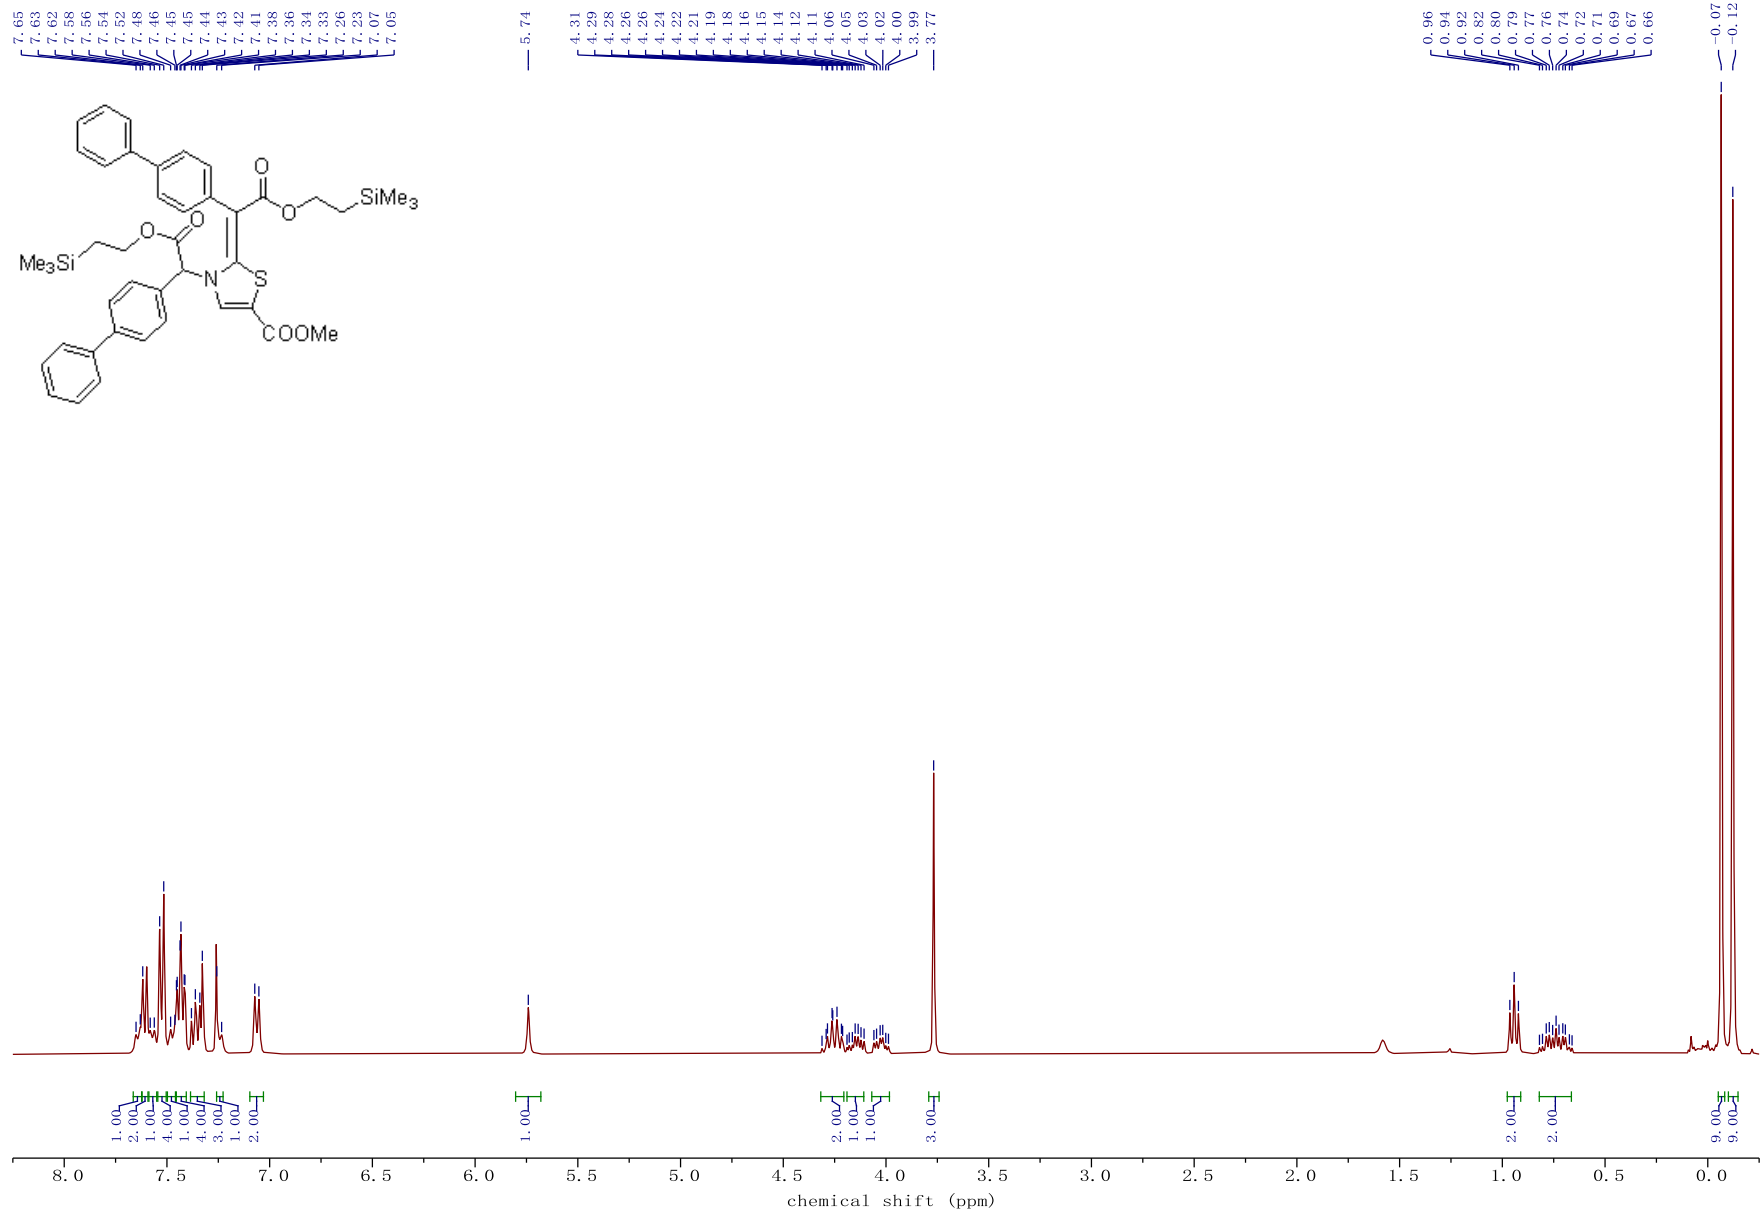

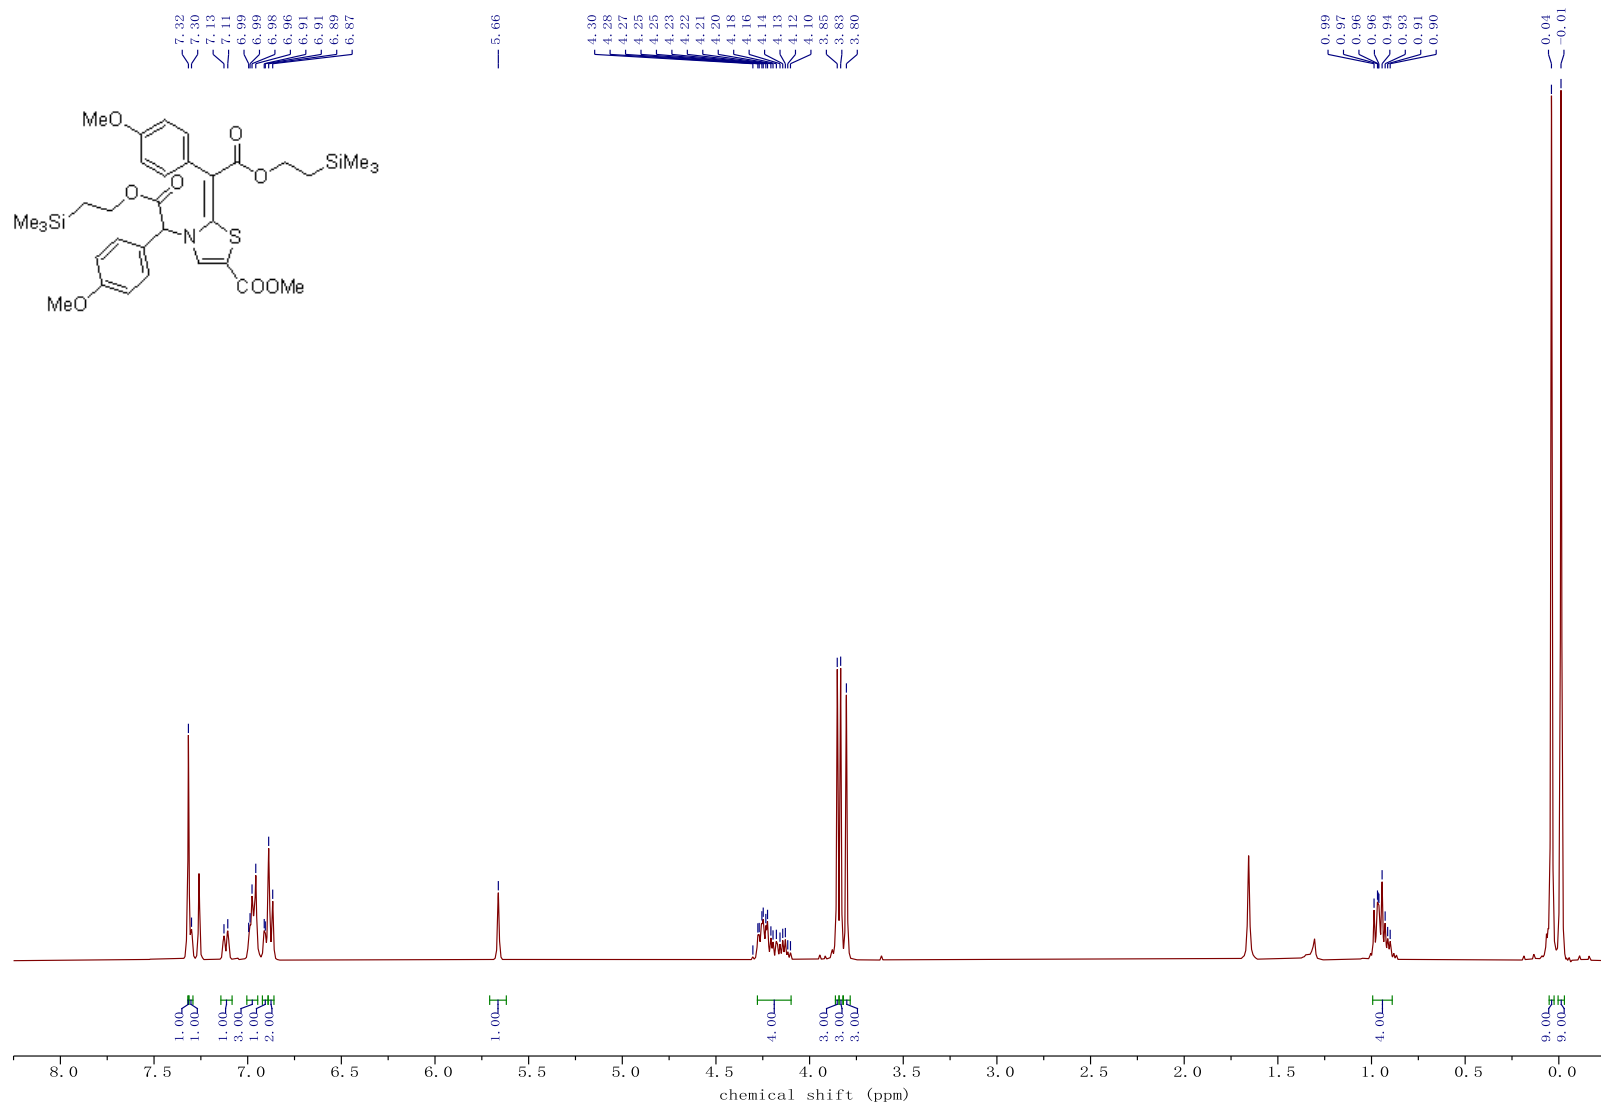

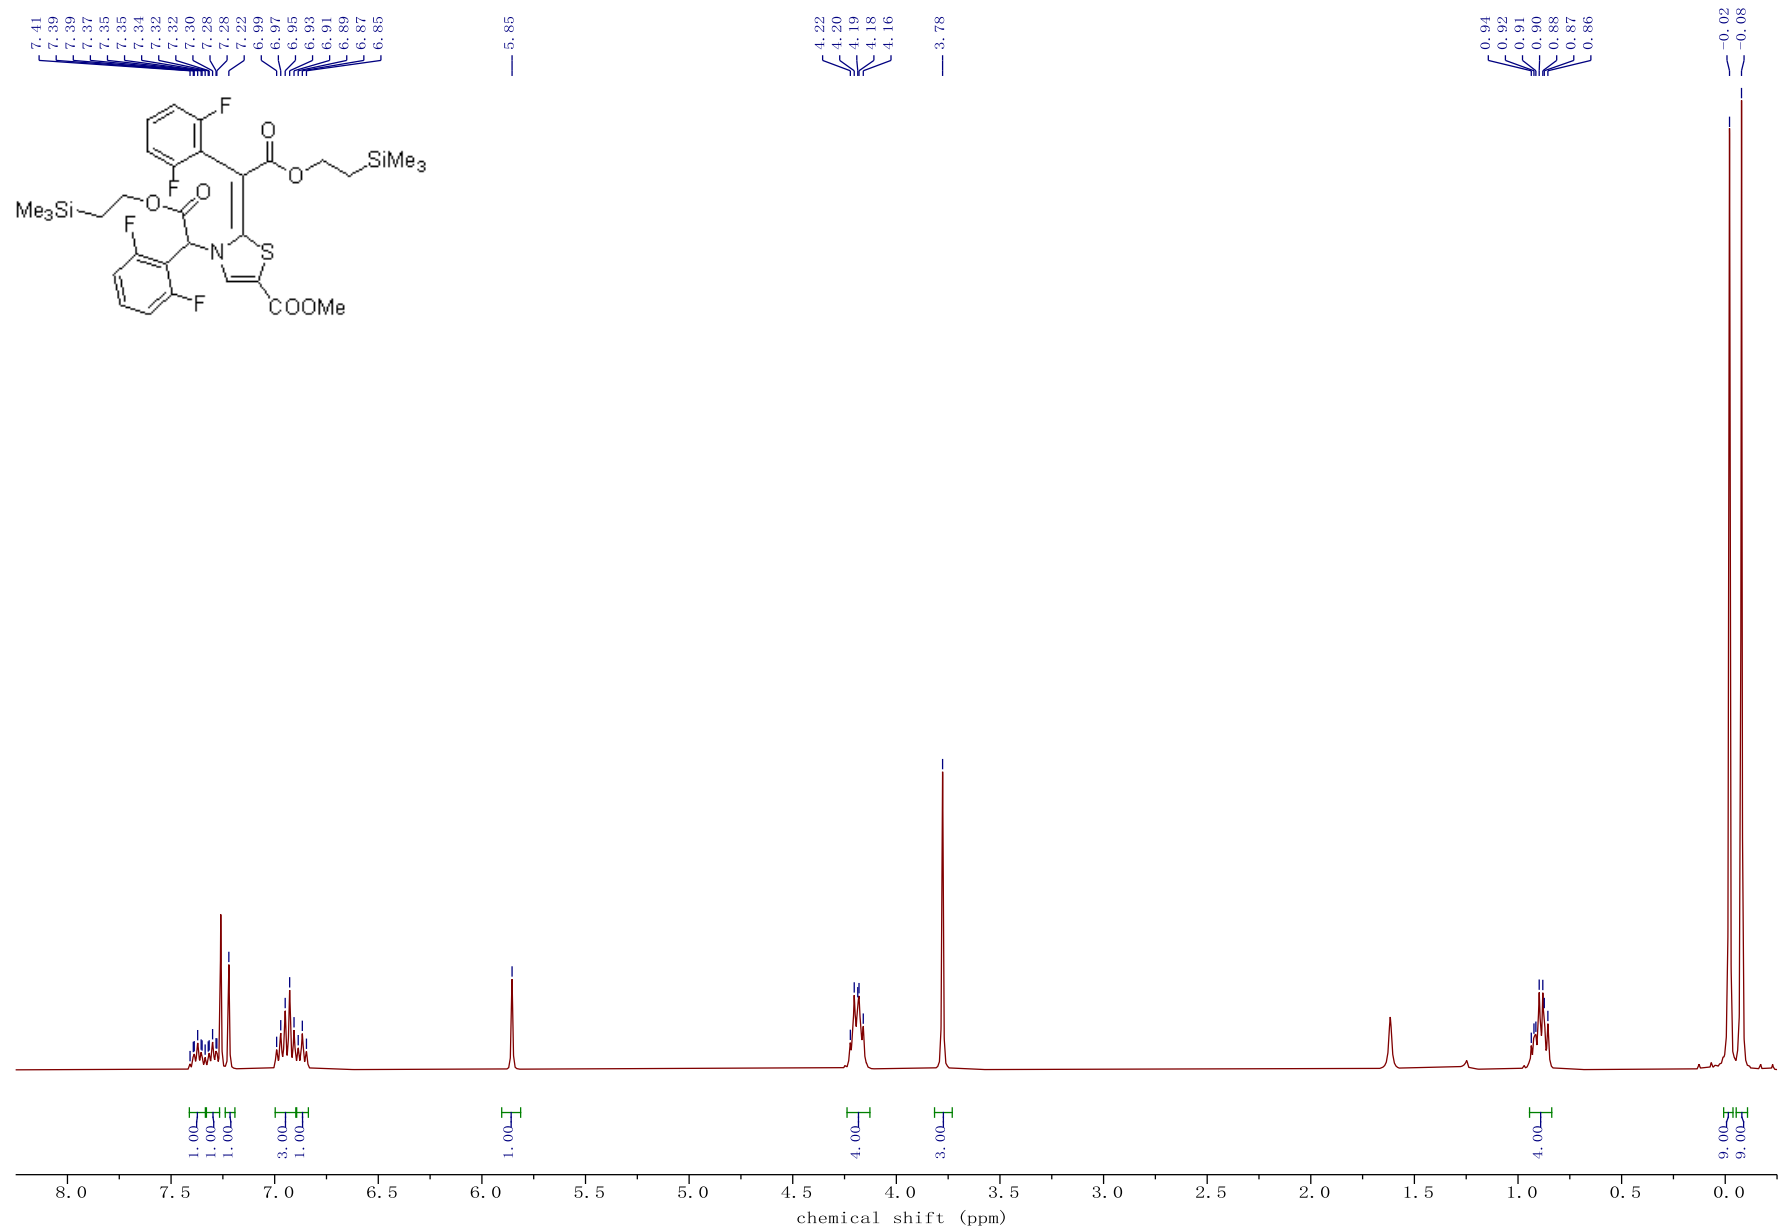

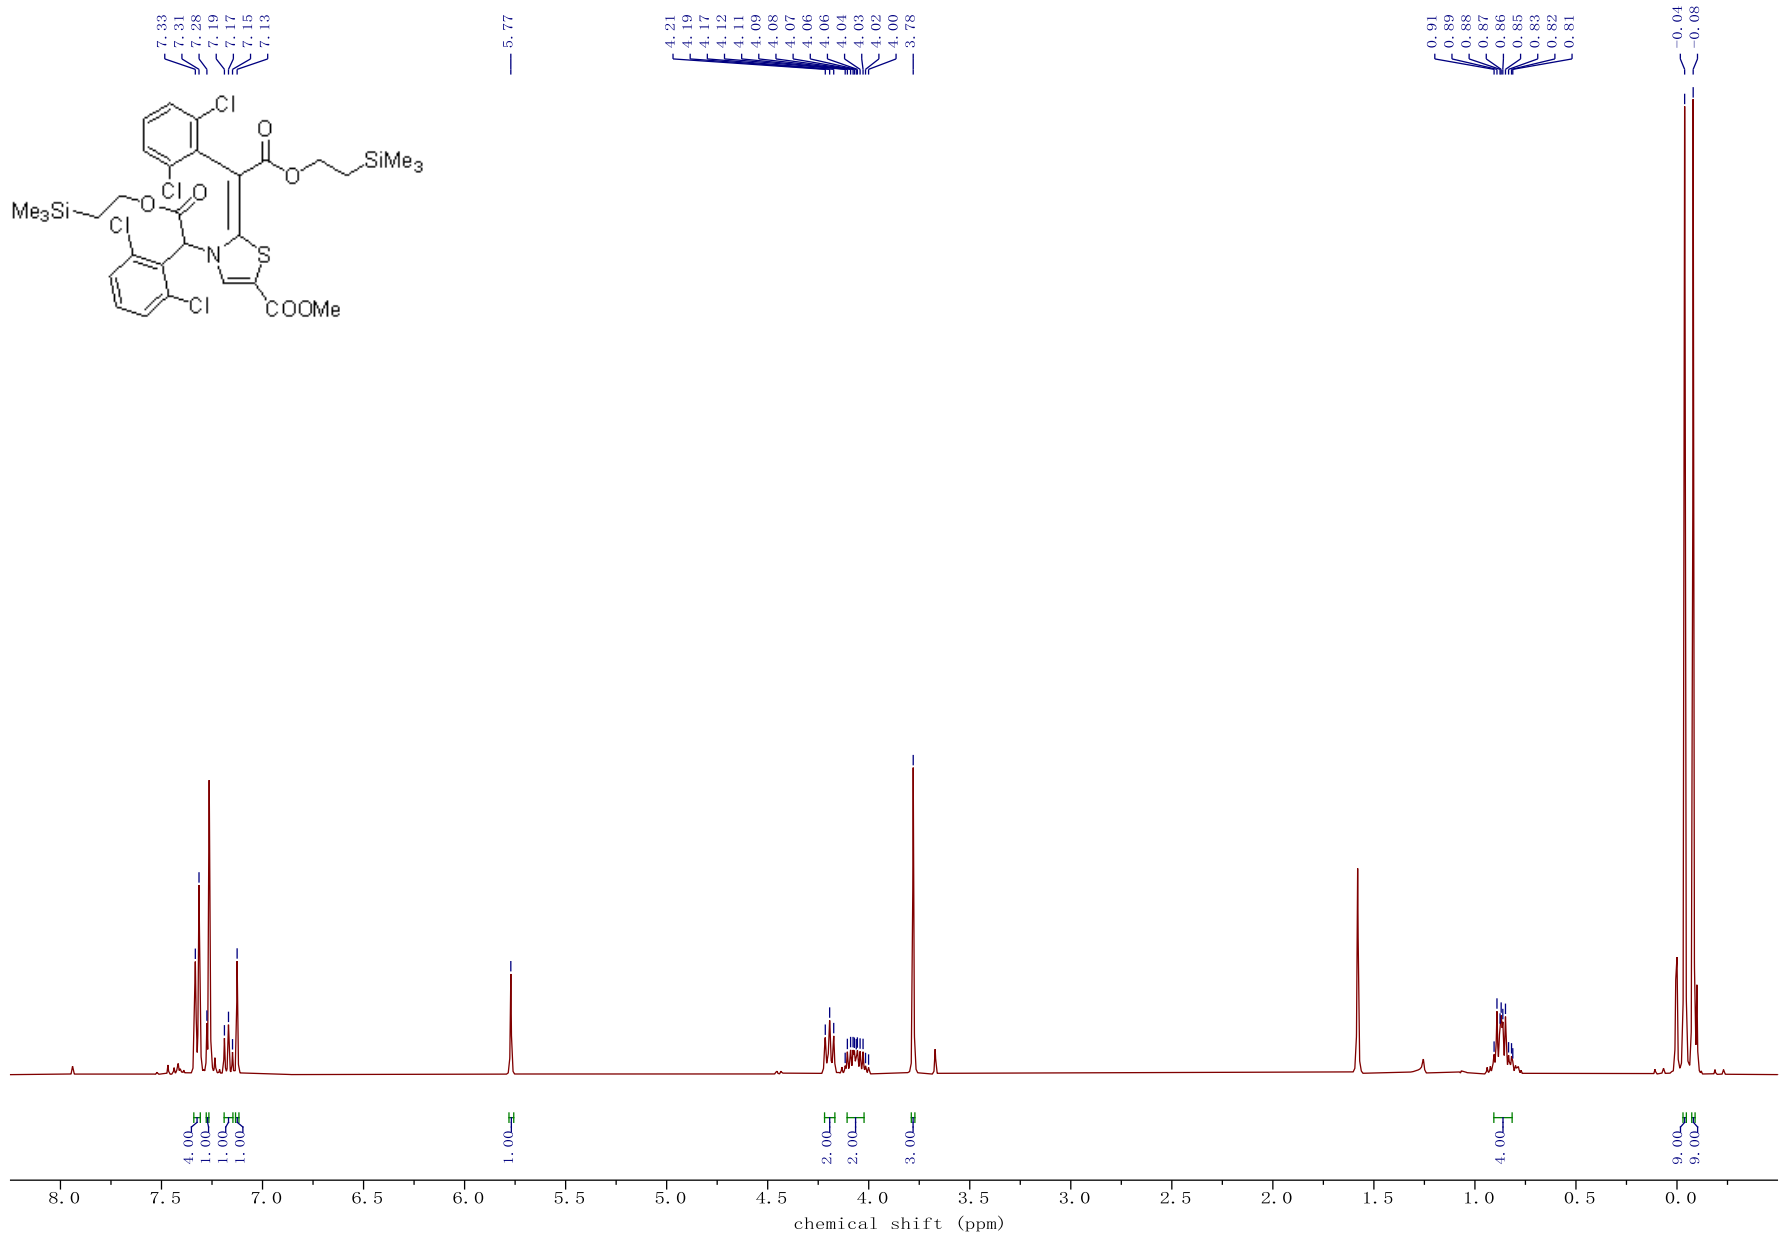

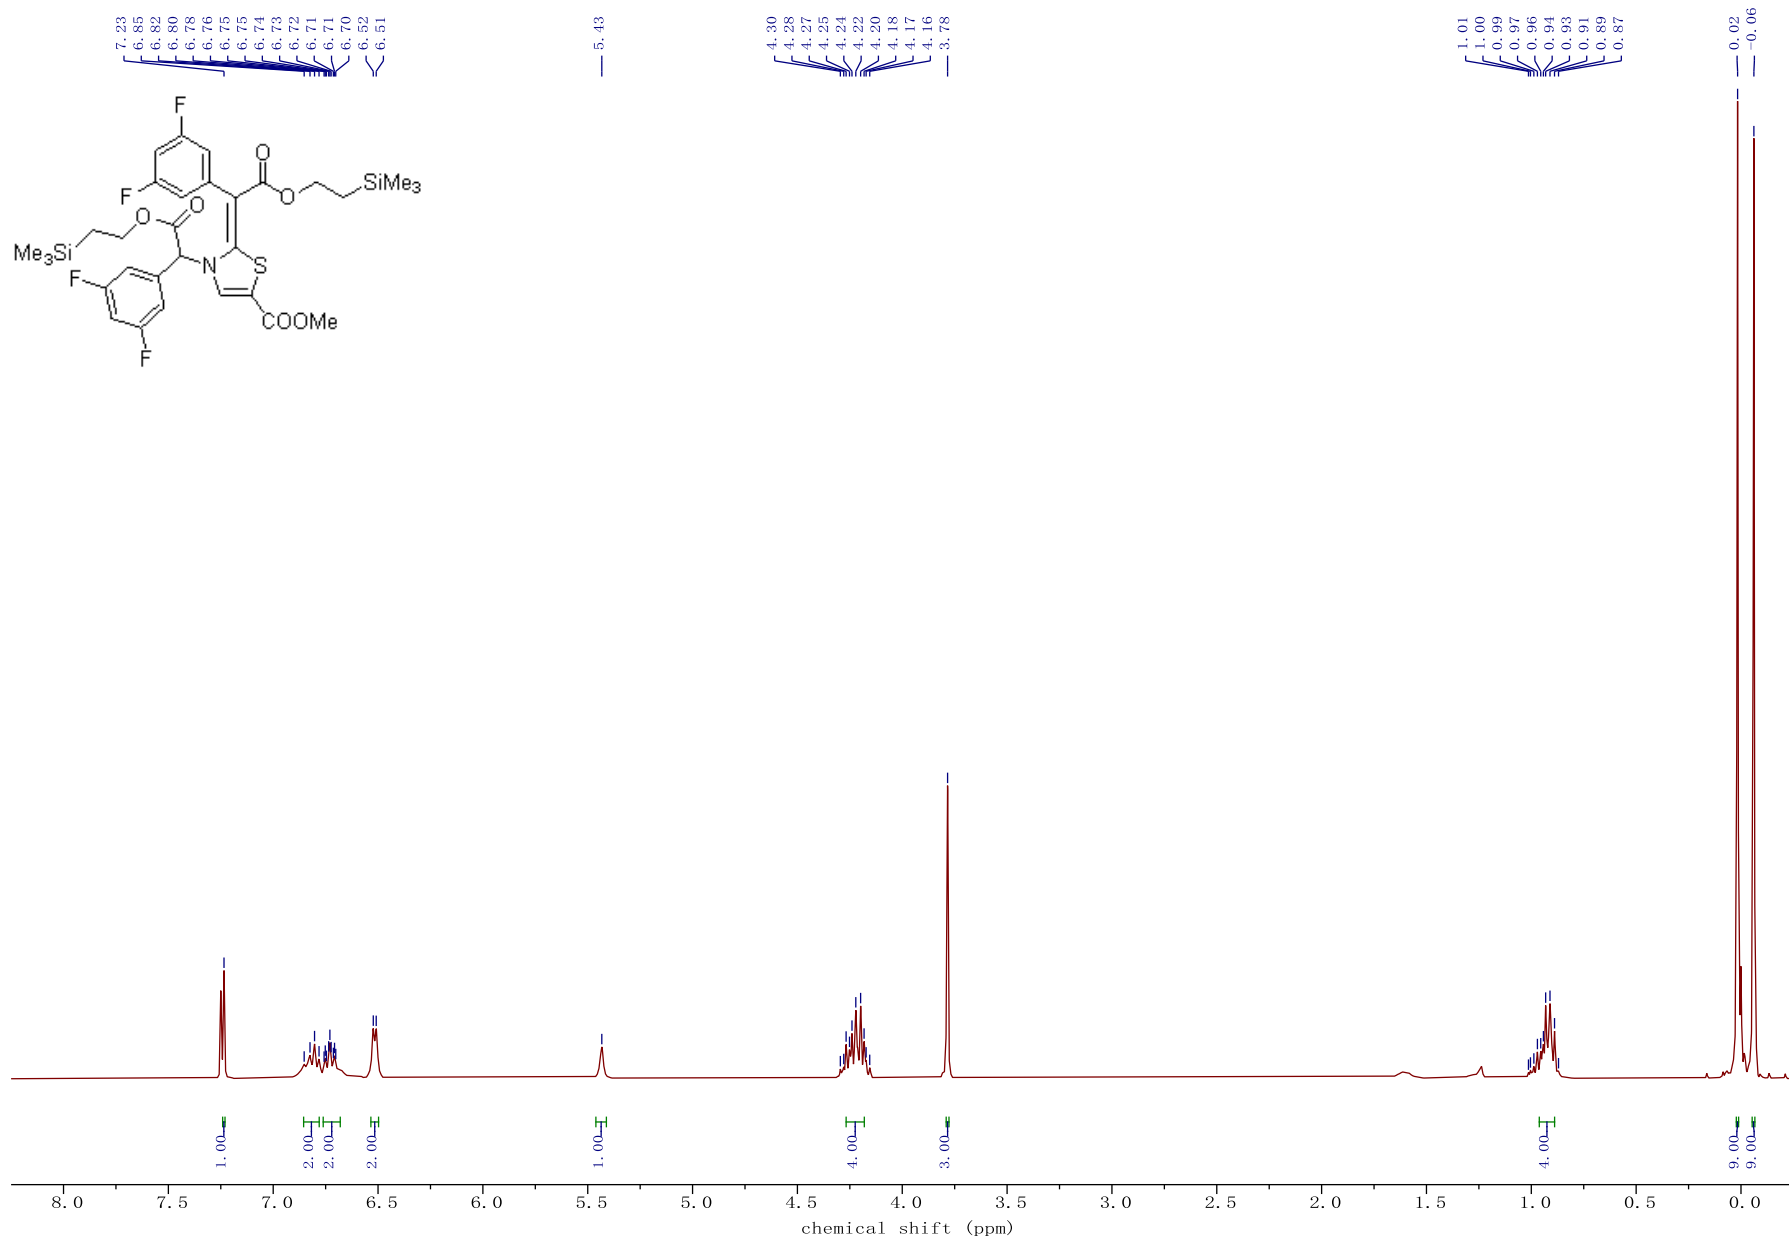

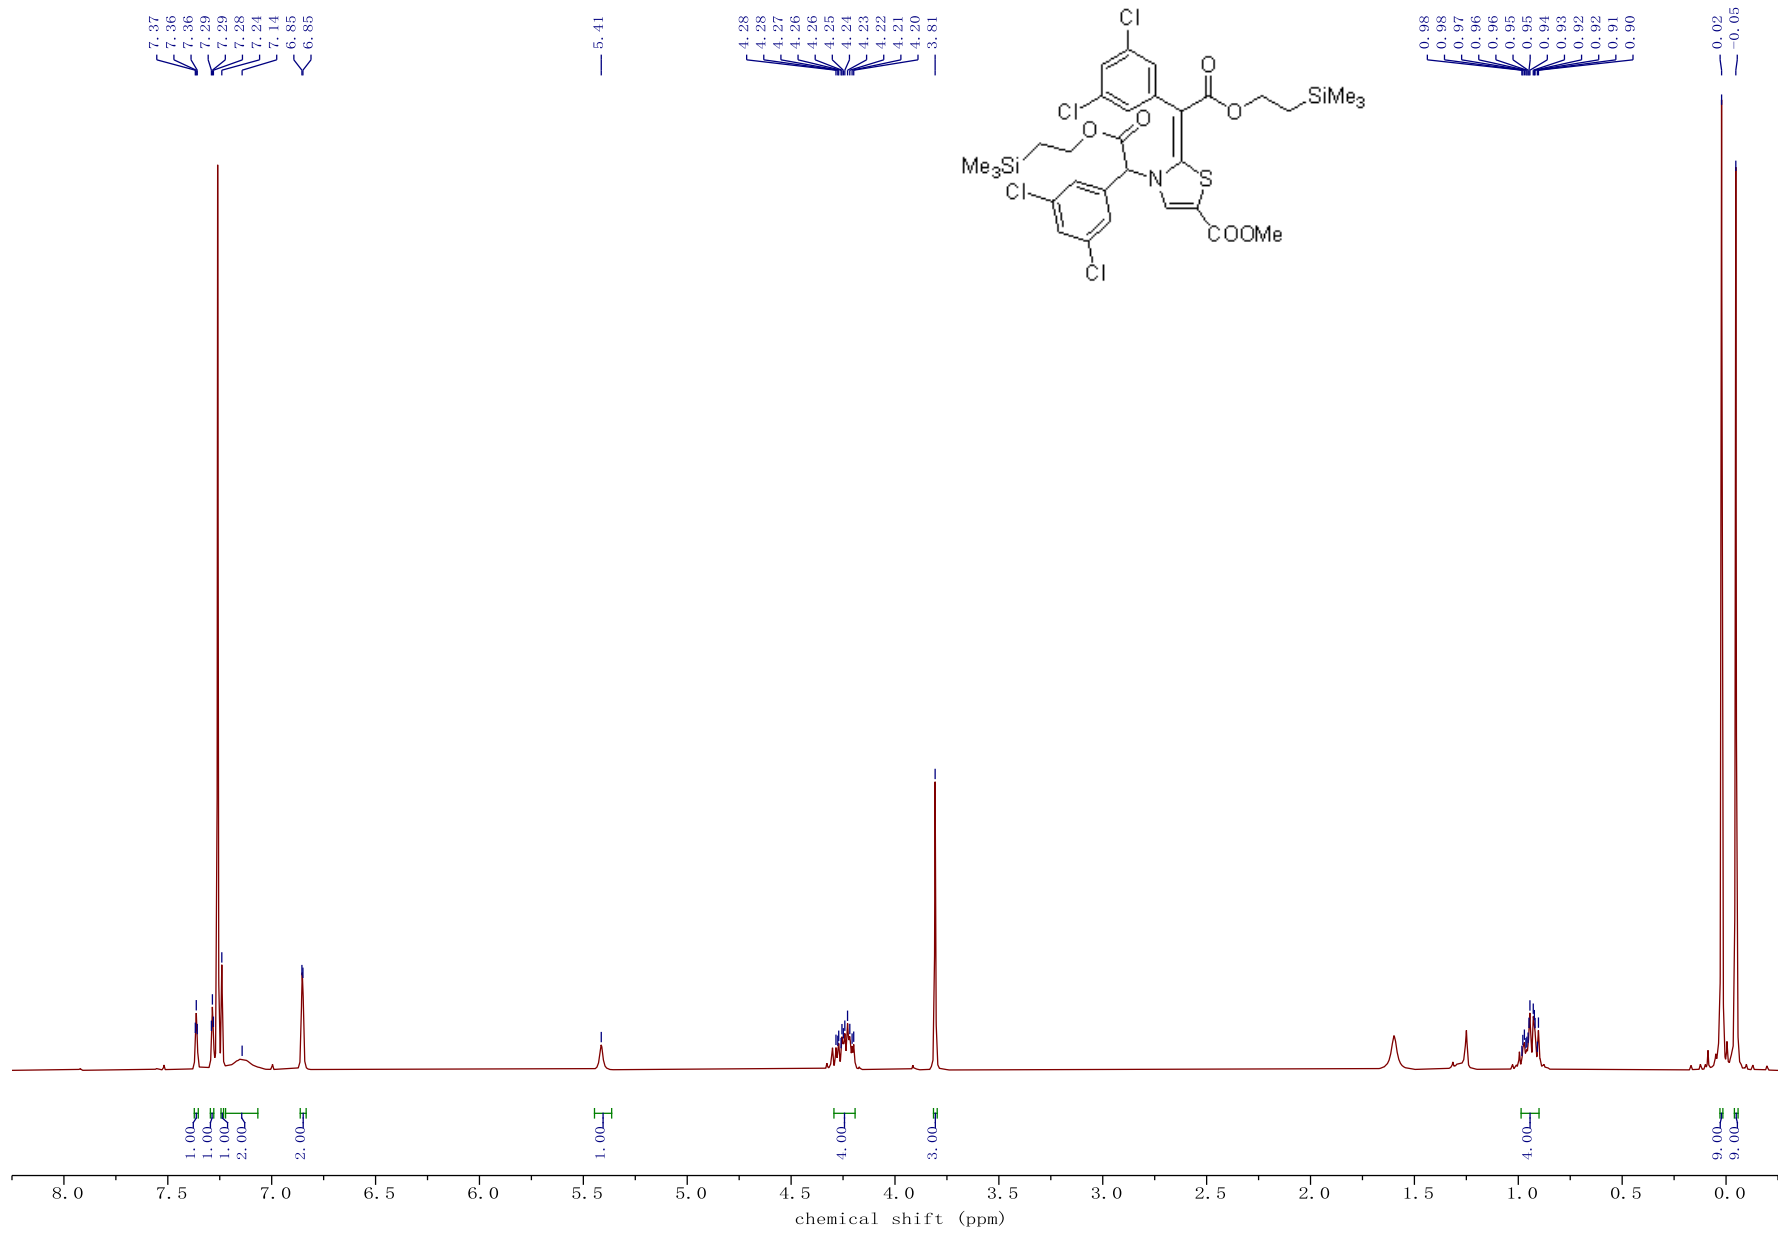

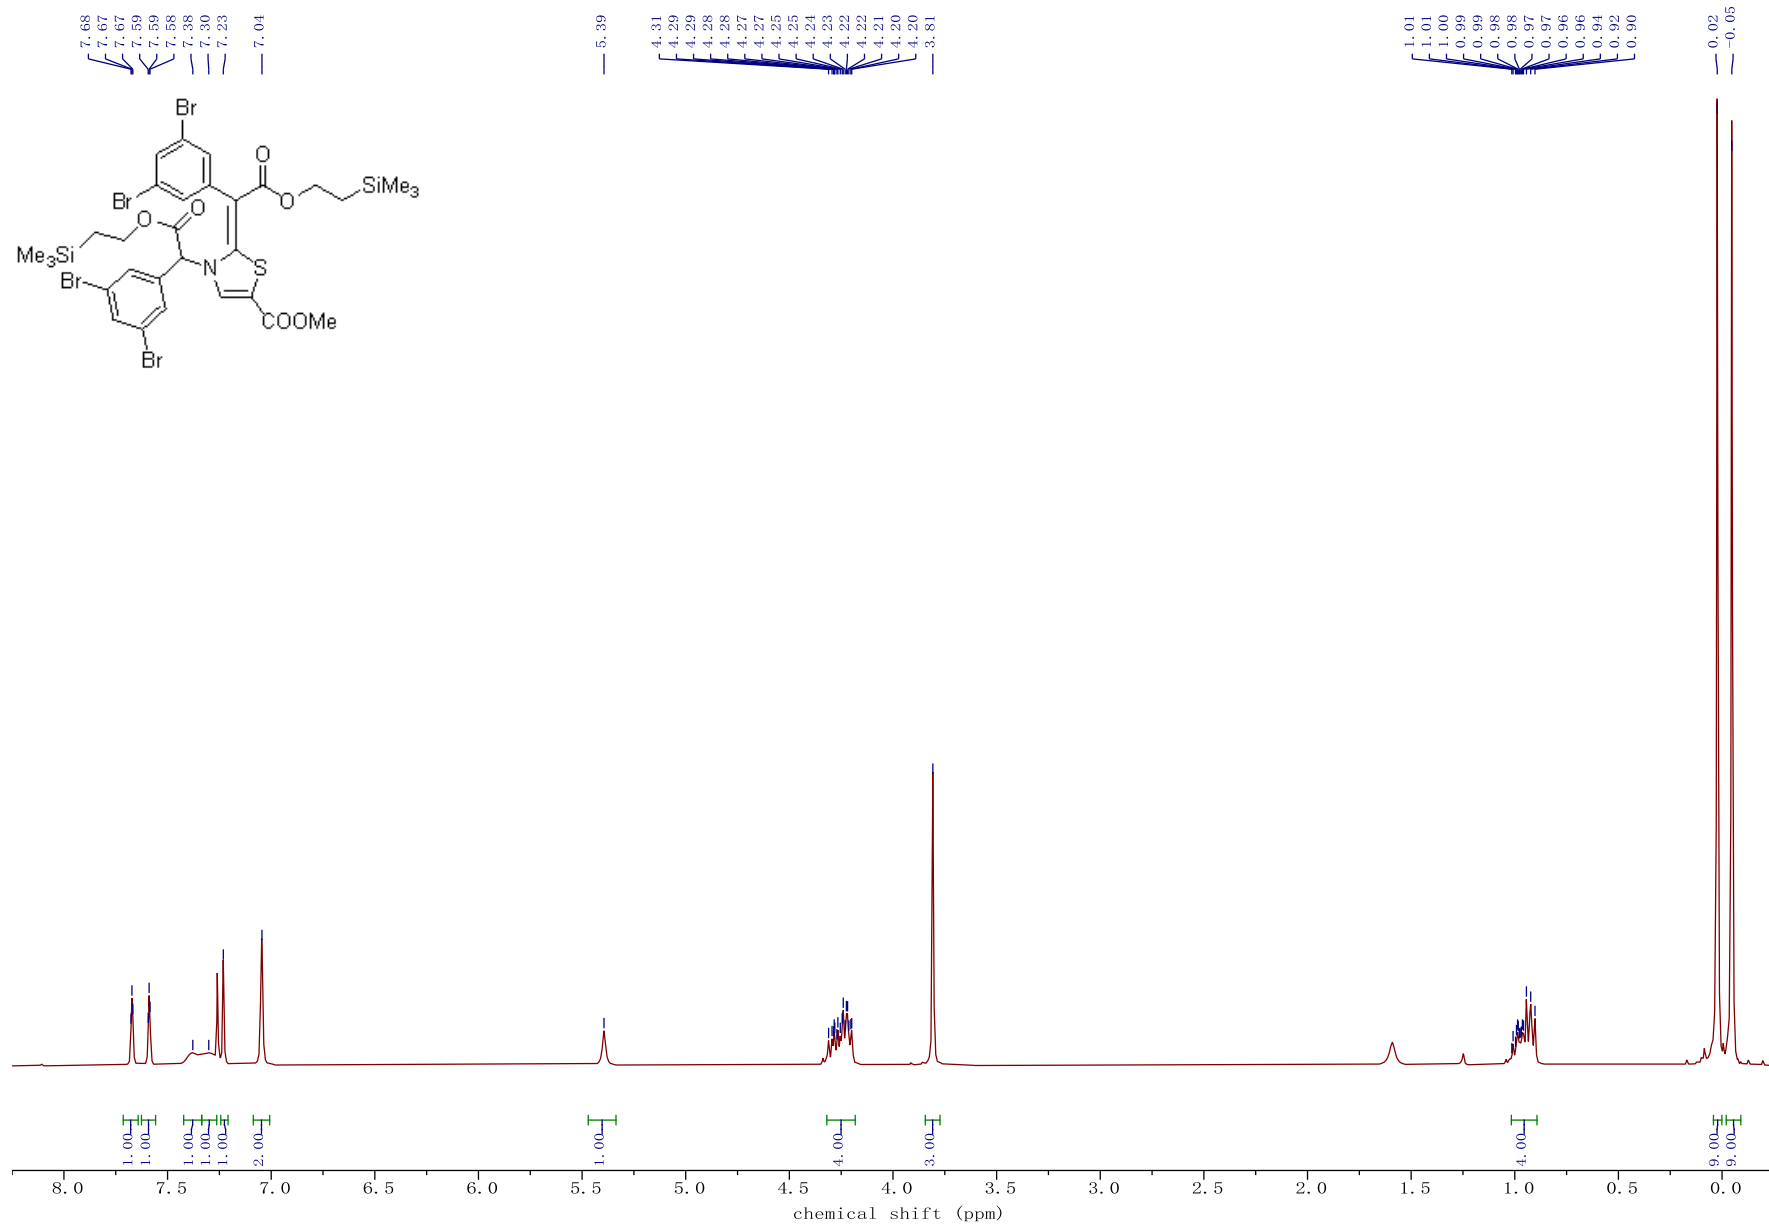



Copies of  $^{13}\text{C}$  NMR spectra of 3a, 3c-3f, 4a-4i, 5a-5l:

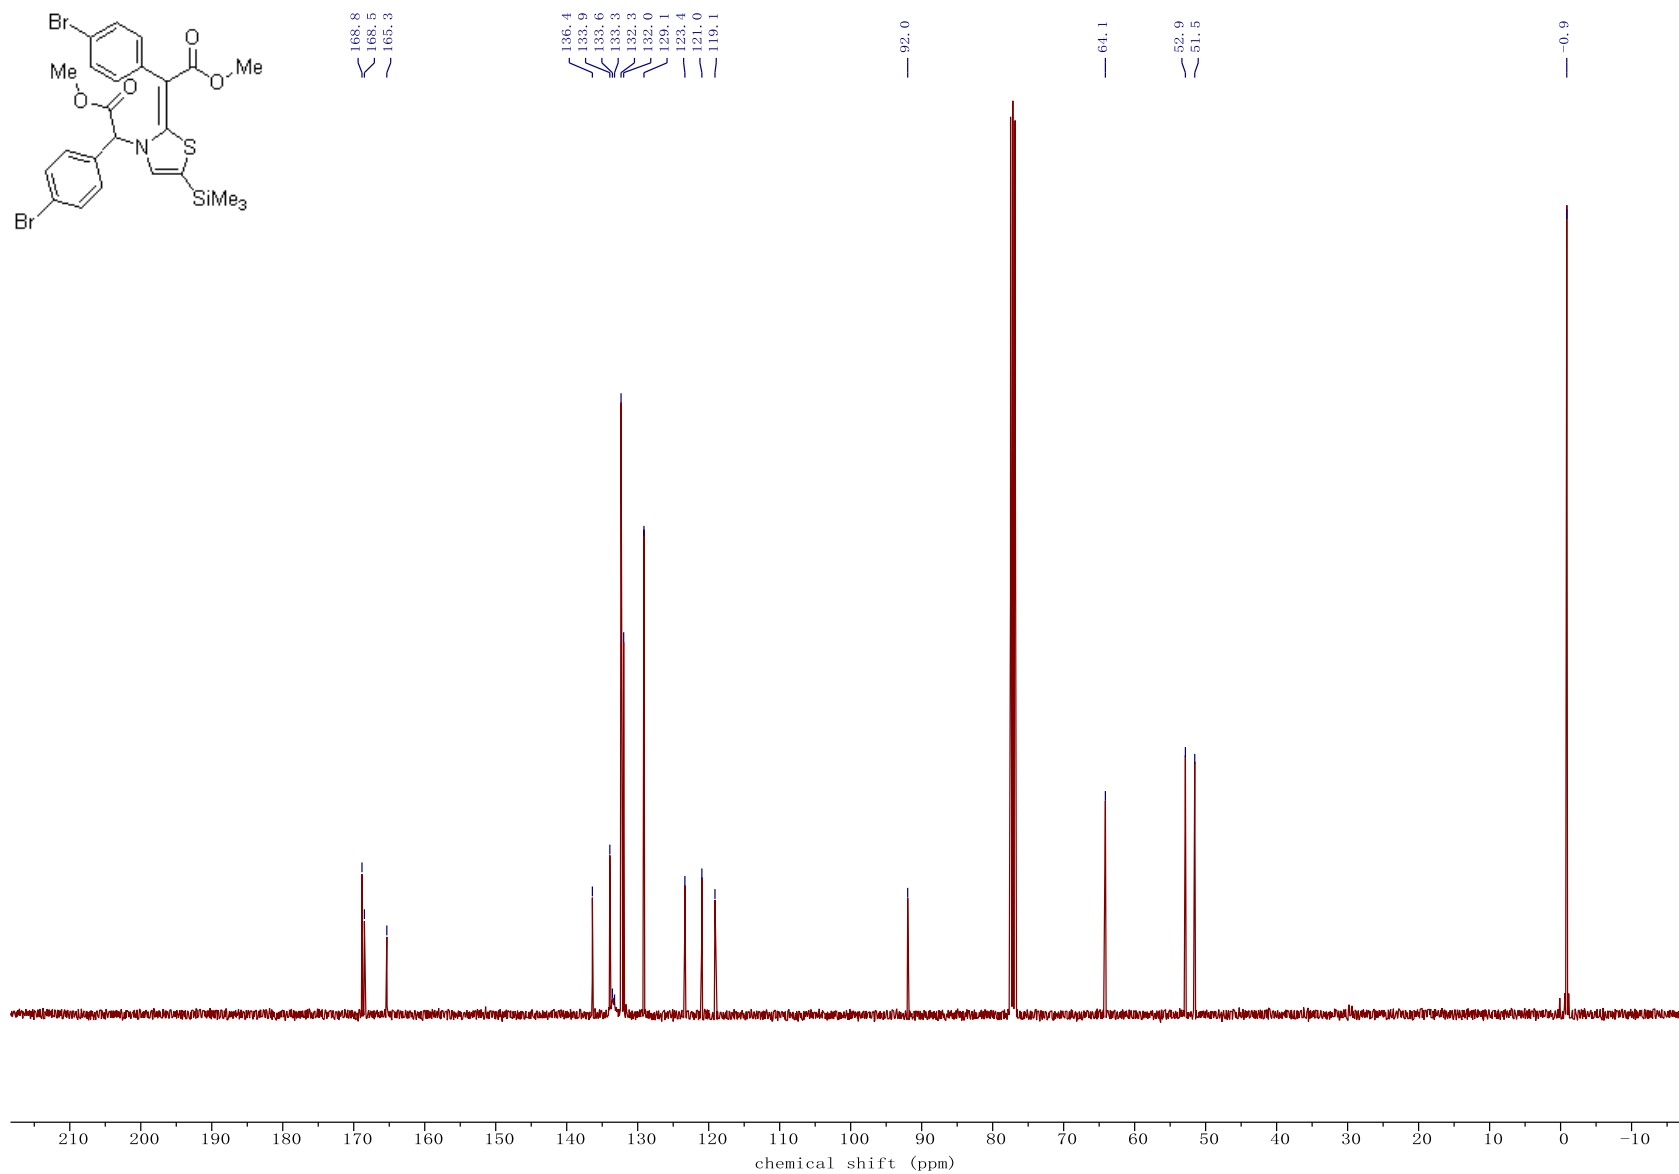

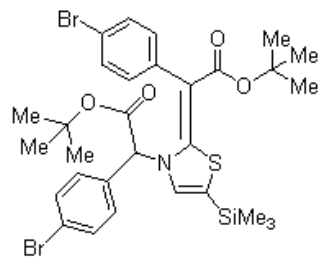

167.8  
167.4  
163.7

137.3  
134.8  
133.2  
132.7  
132.1  
131.8  
129.1  
122.9  
120.3  
117.9

93.9

83.6

79.2

63.9

28.7  
27.9

-0.8

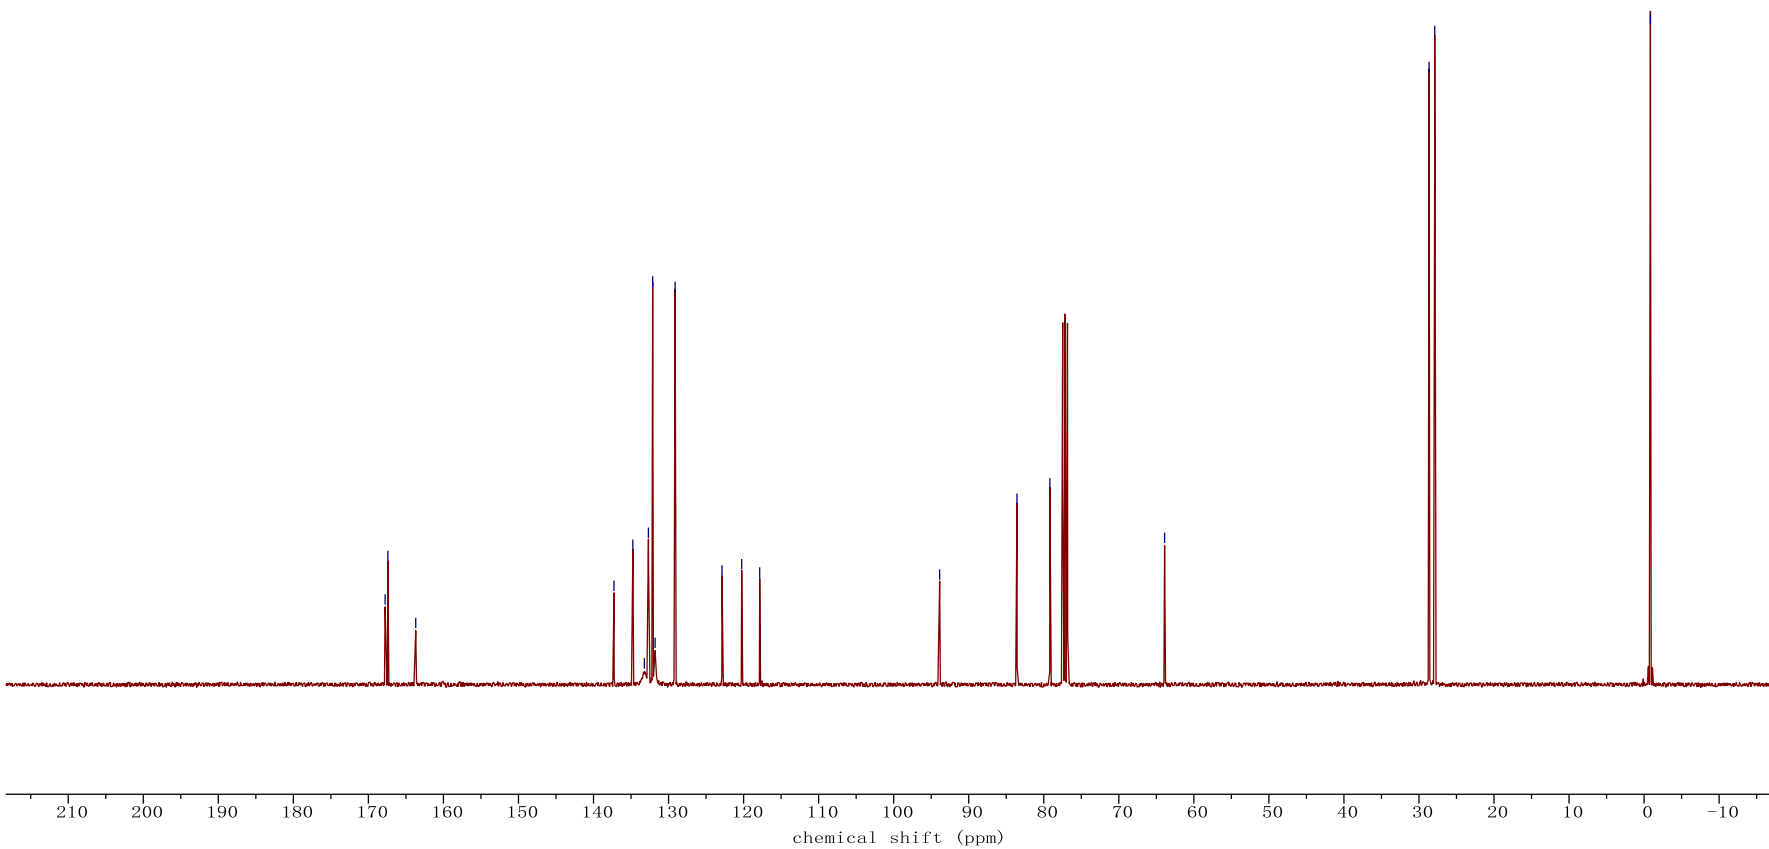

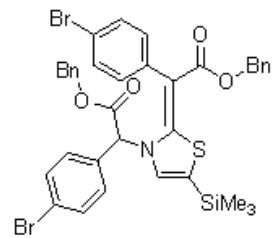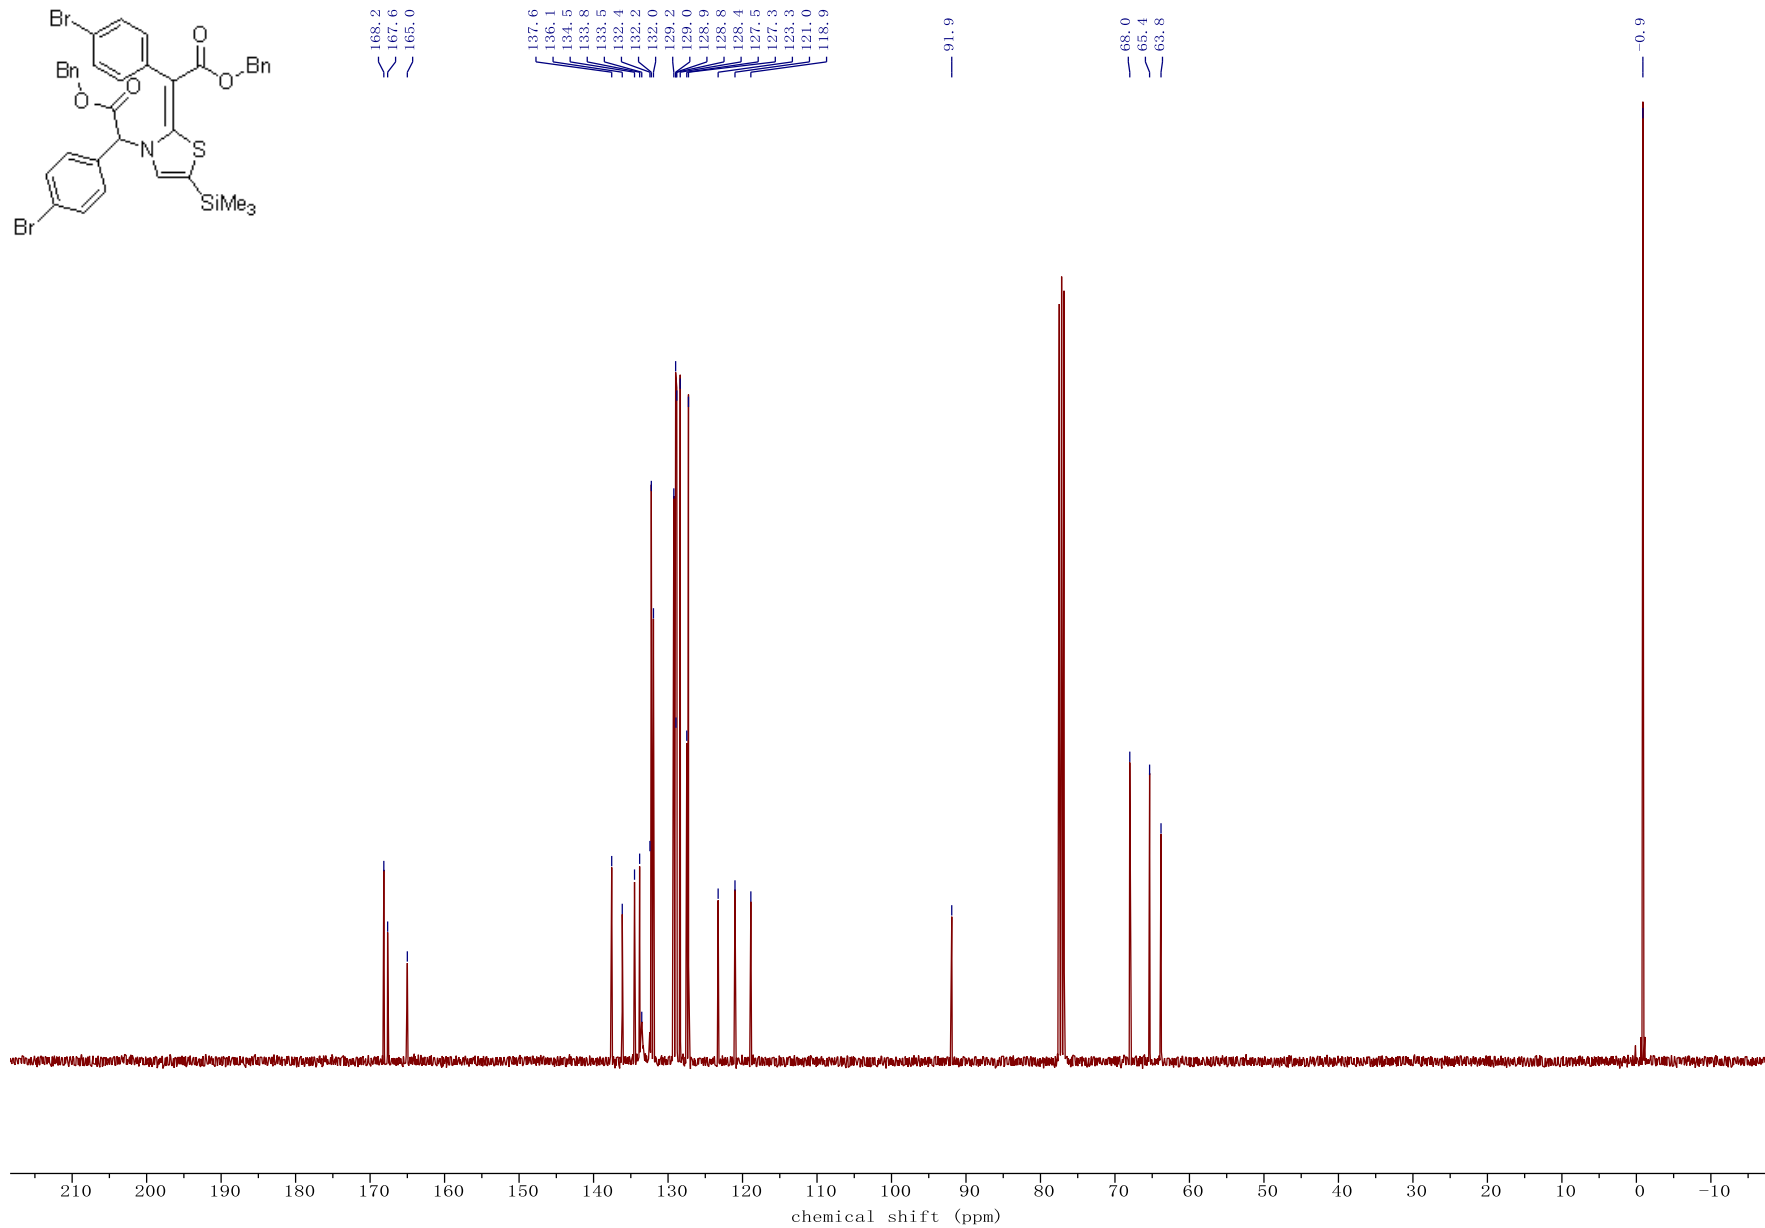

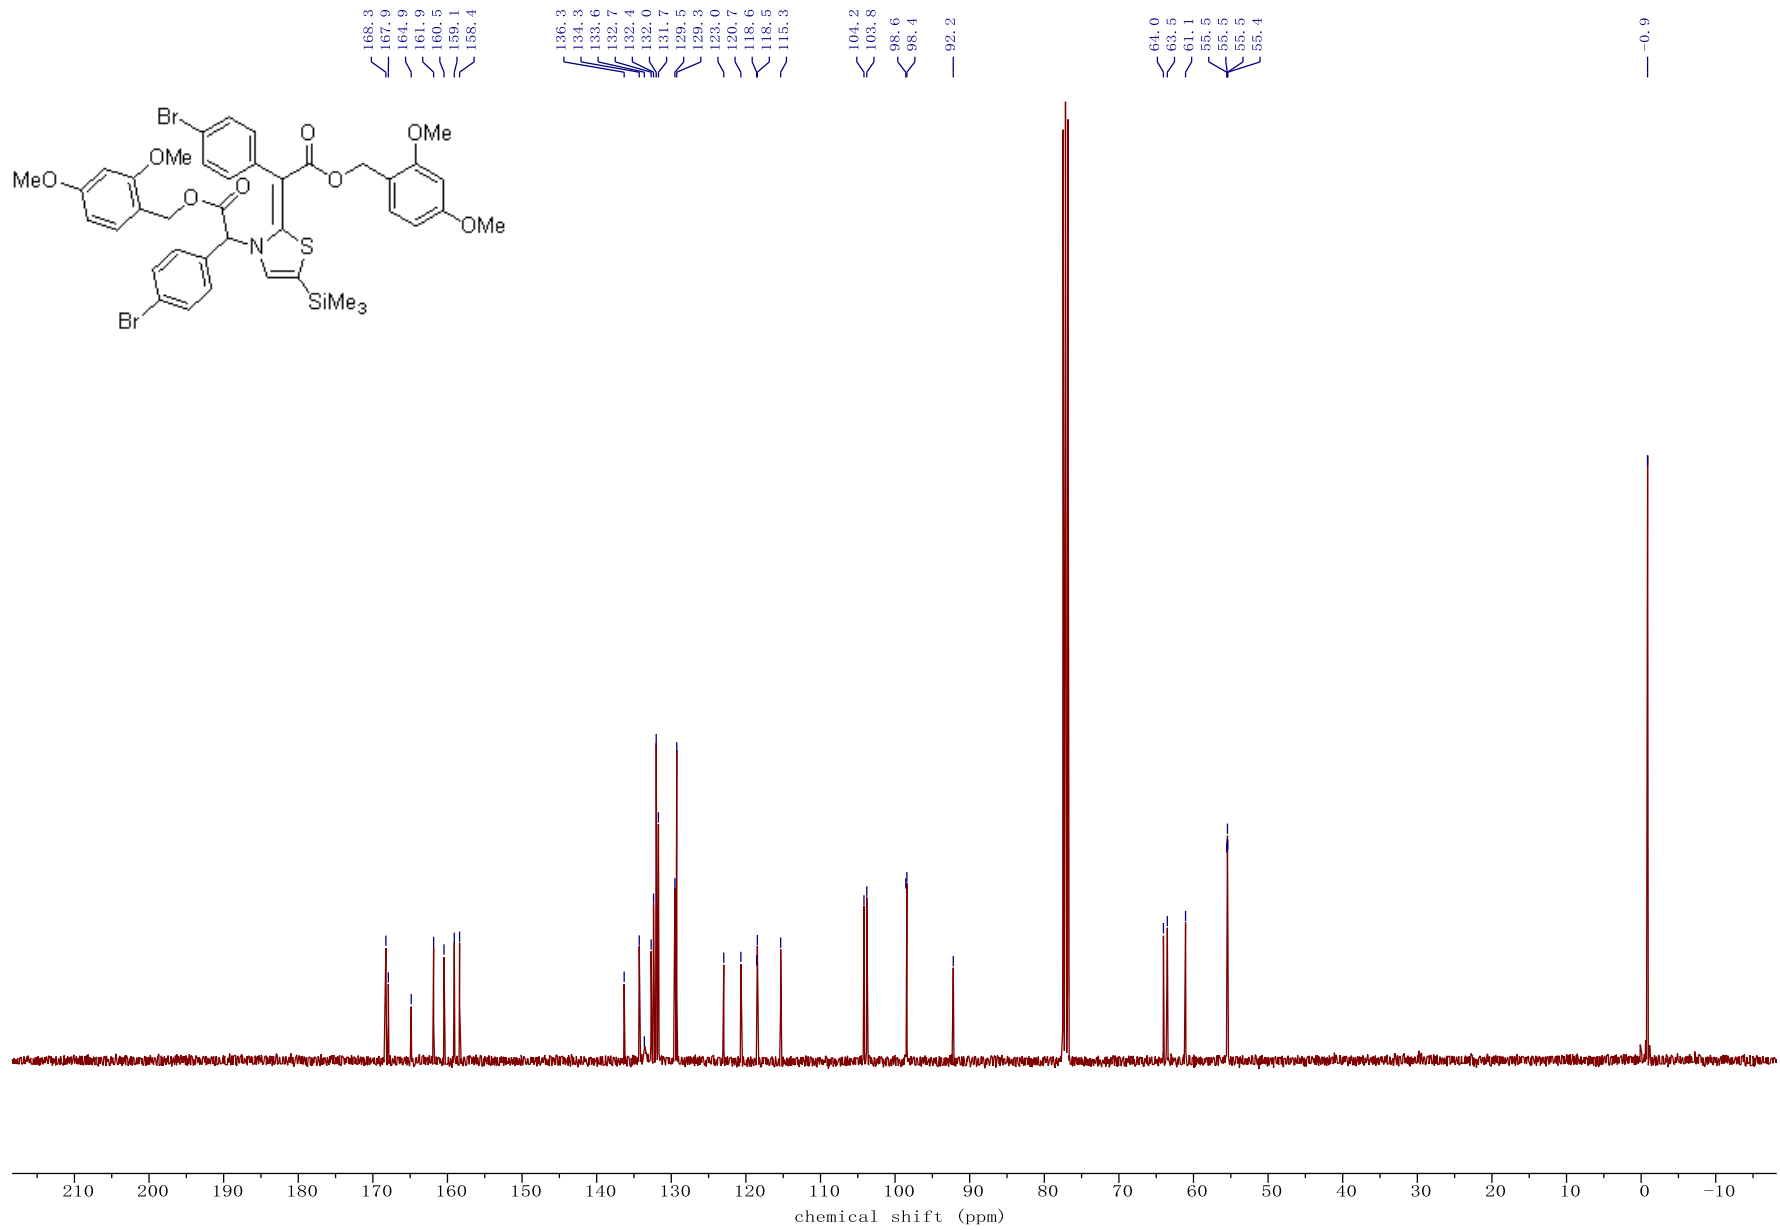

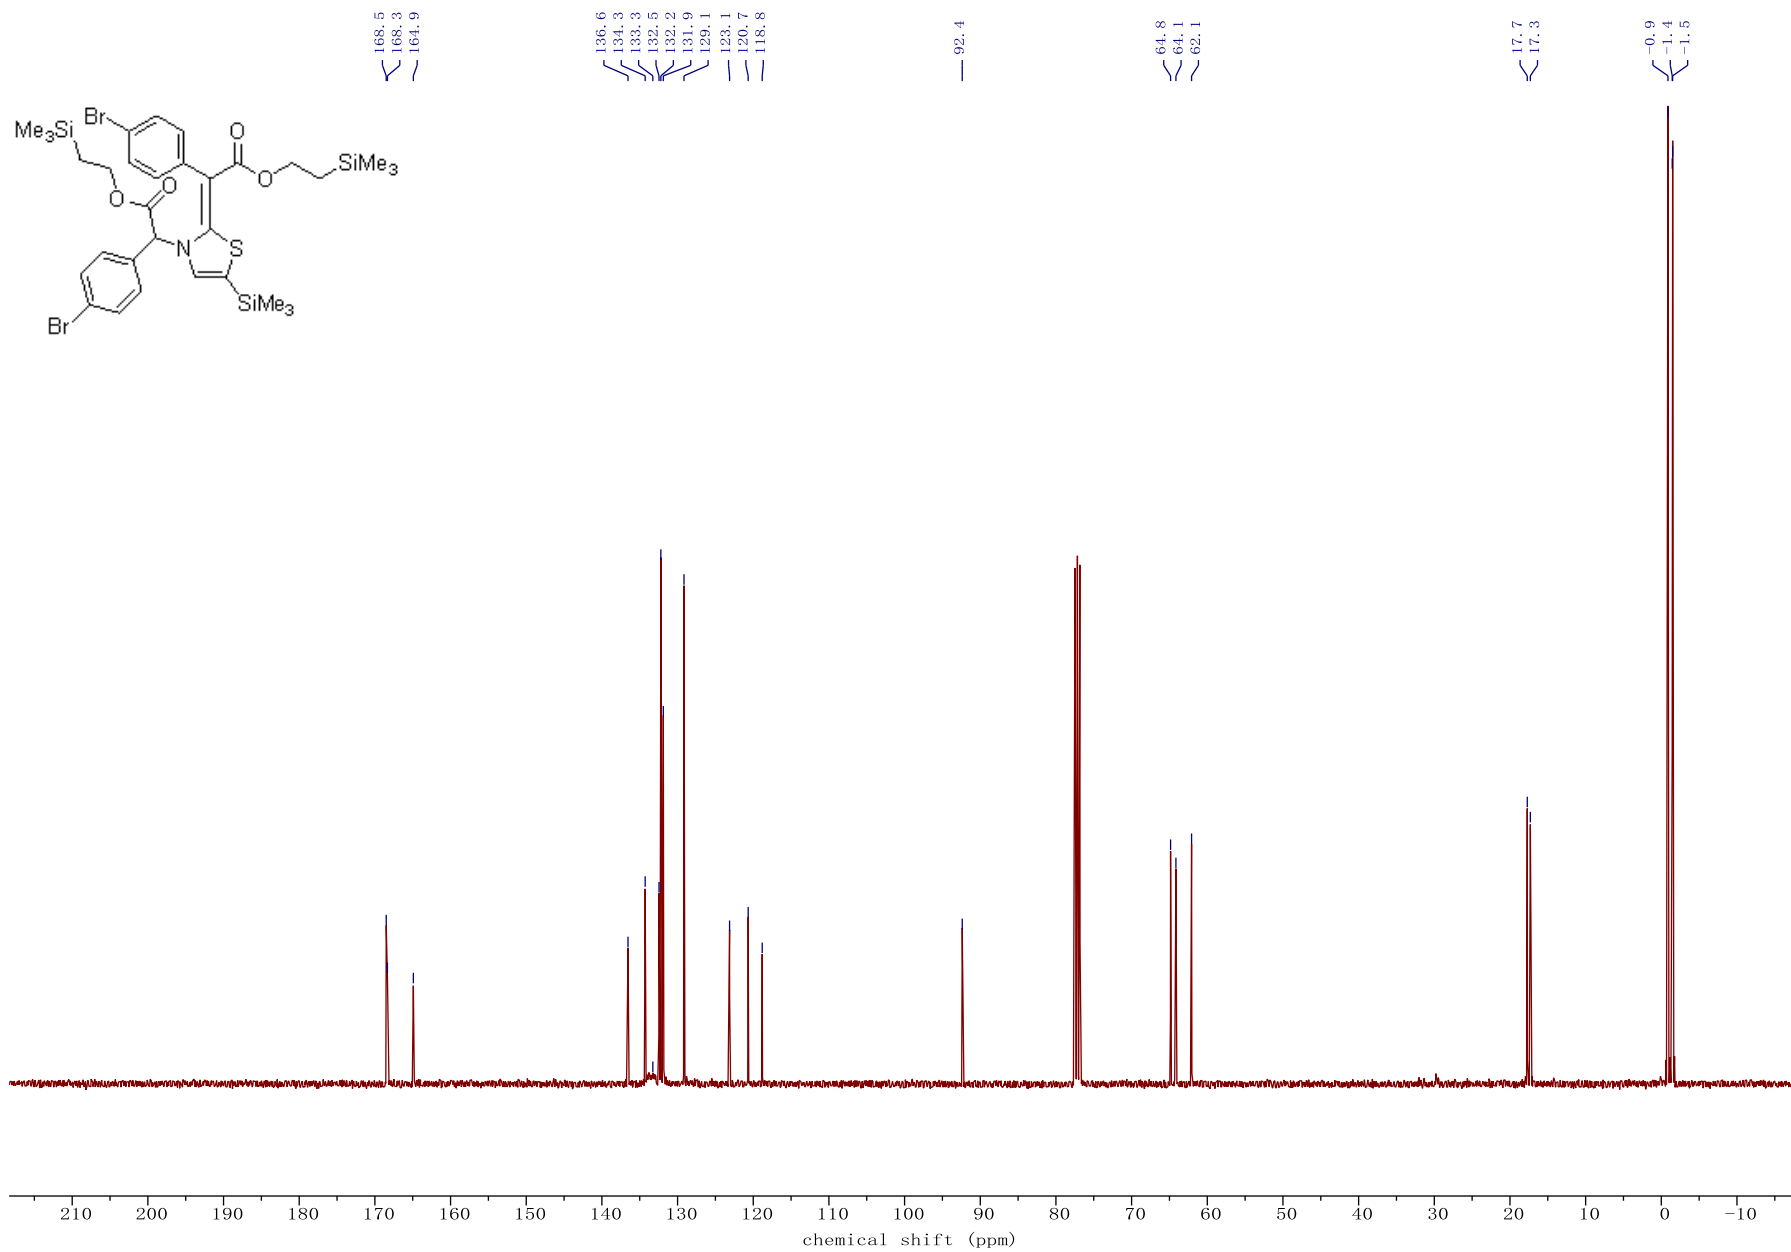

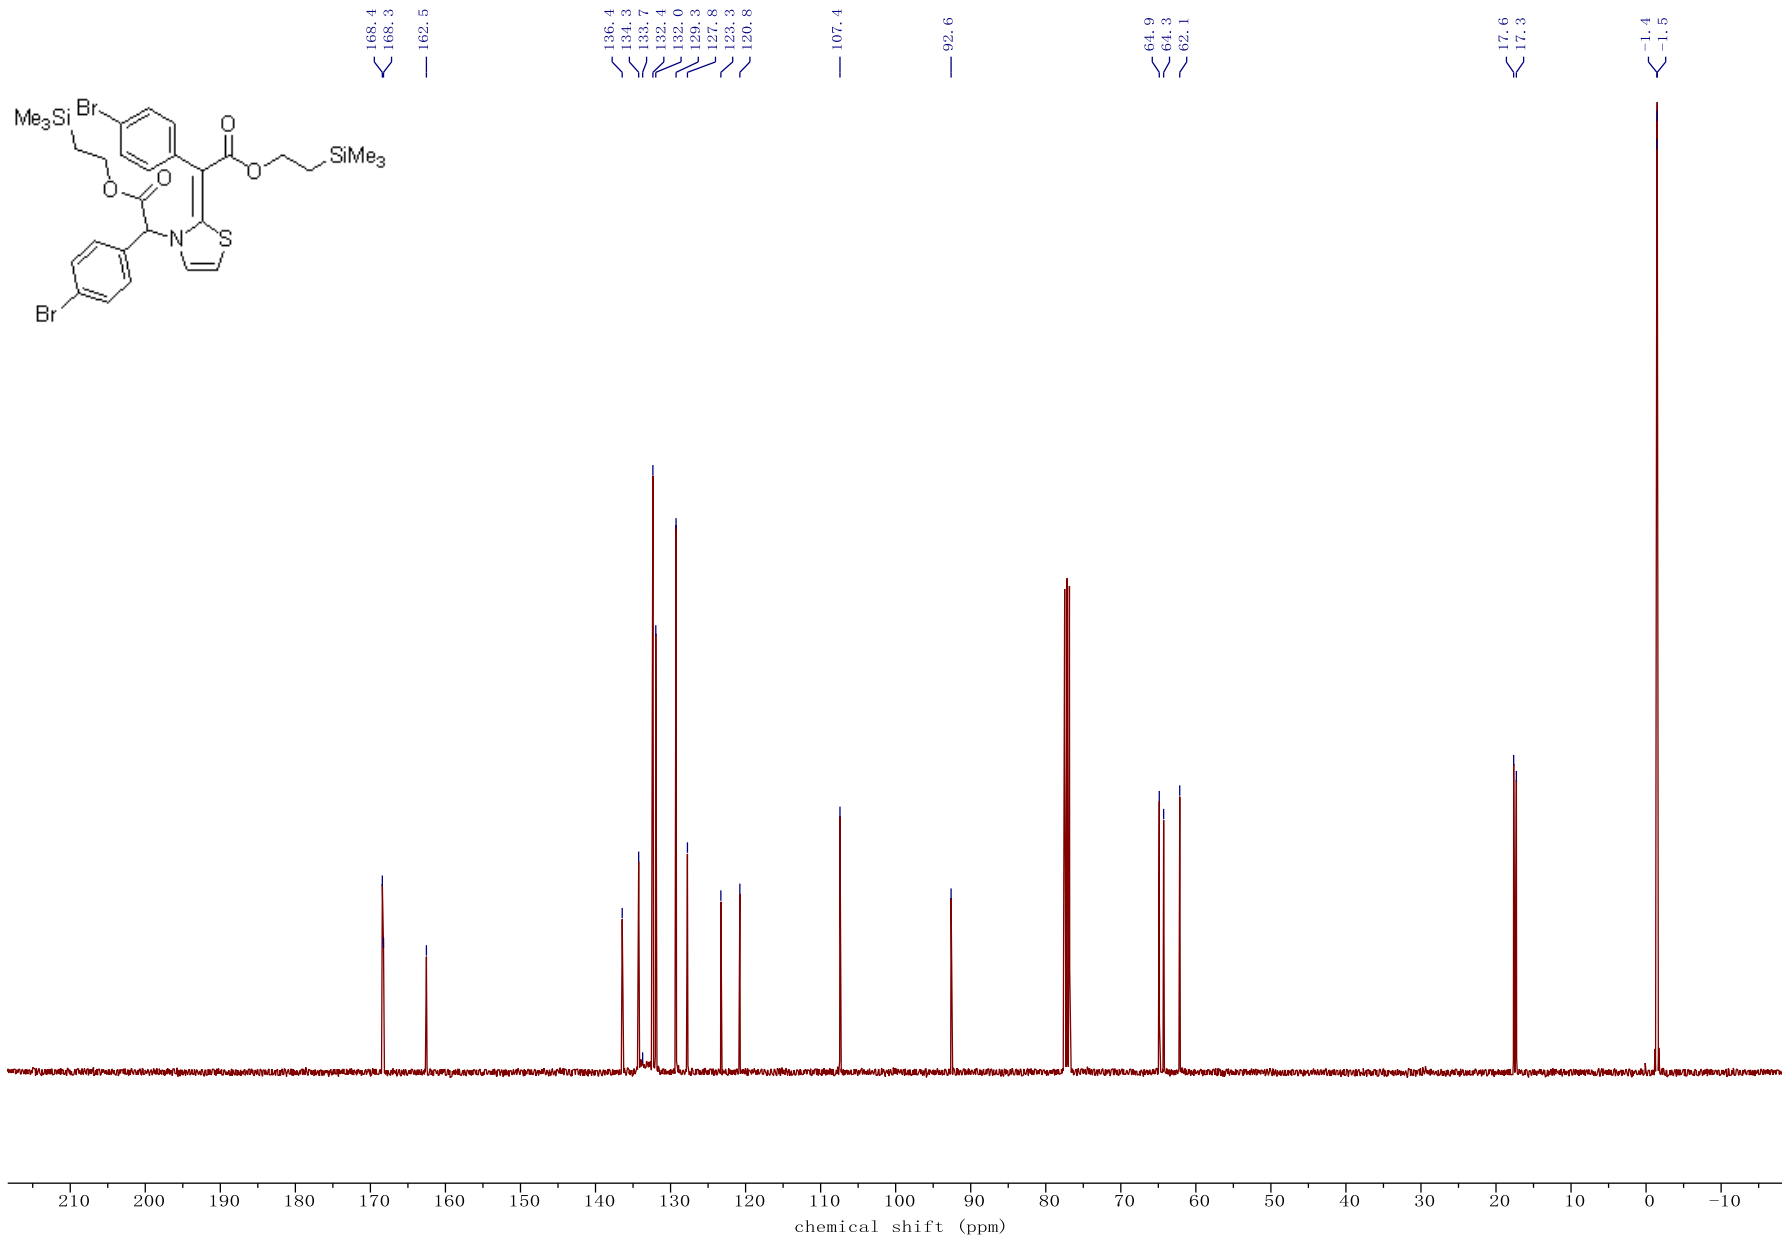

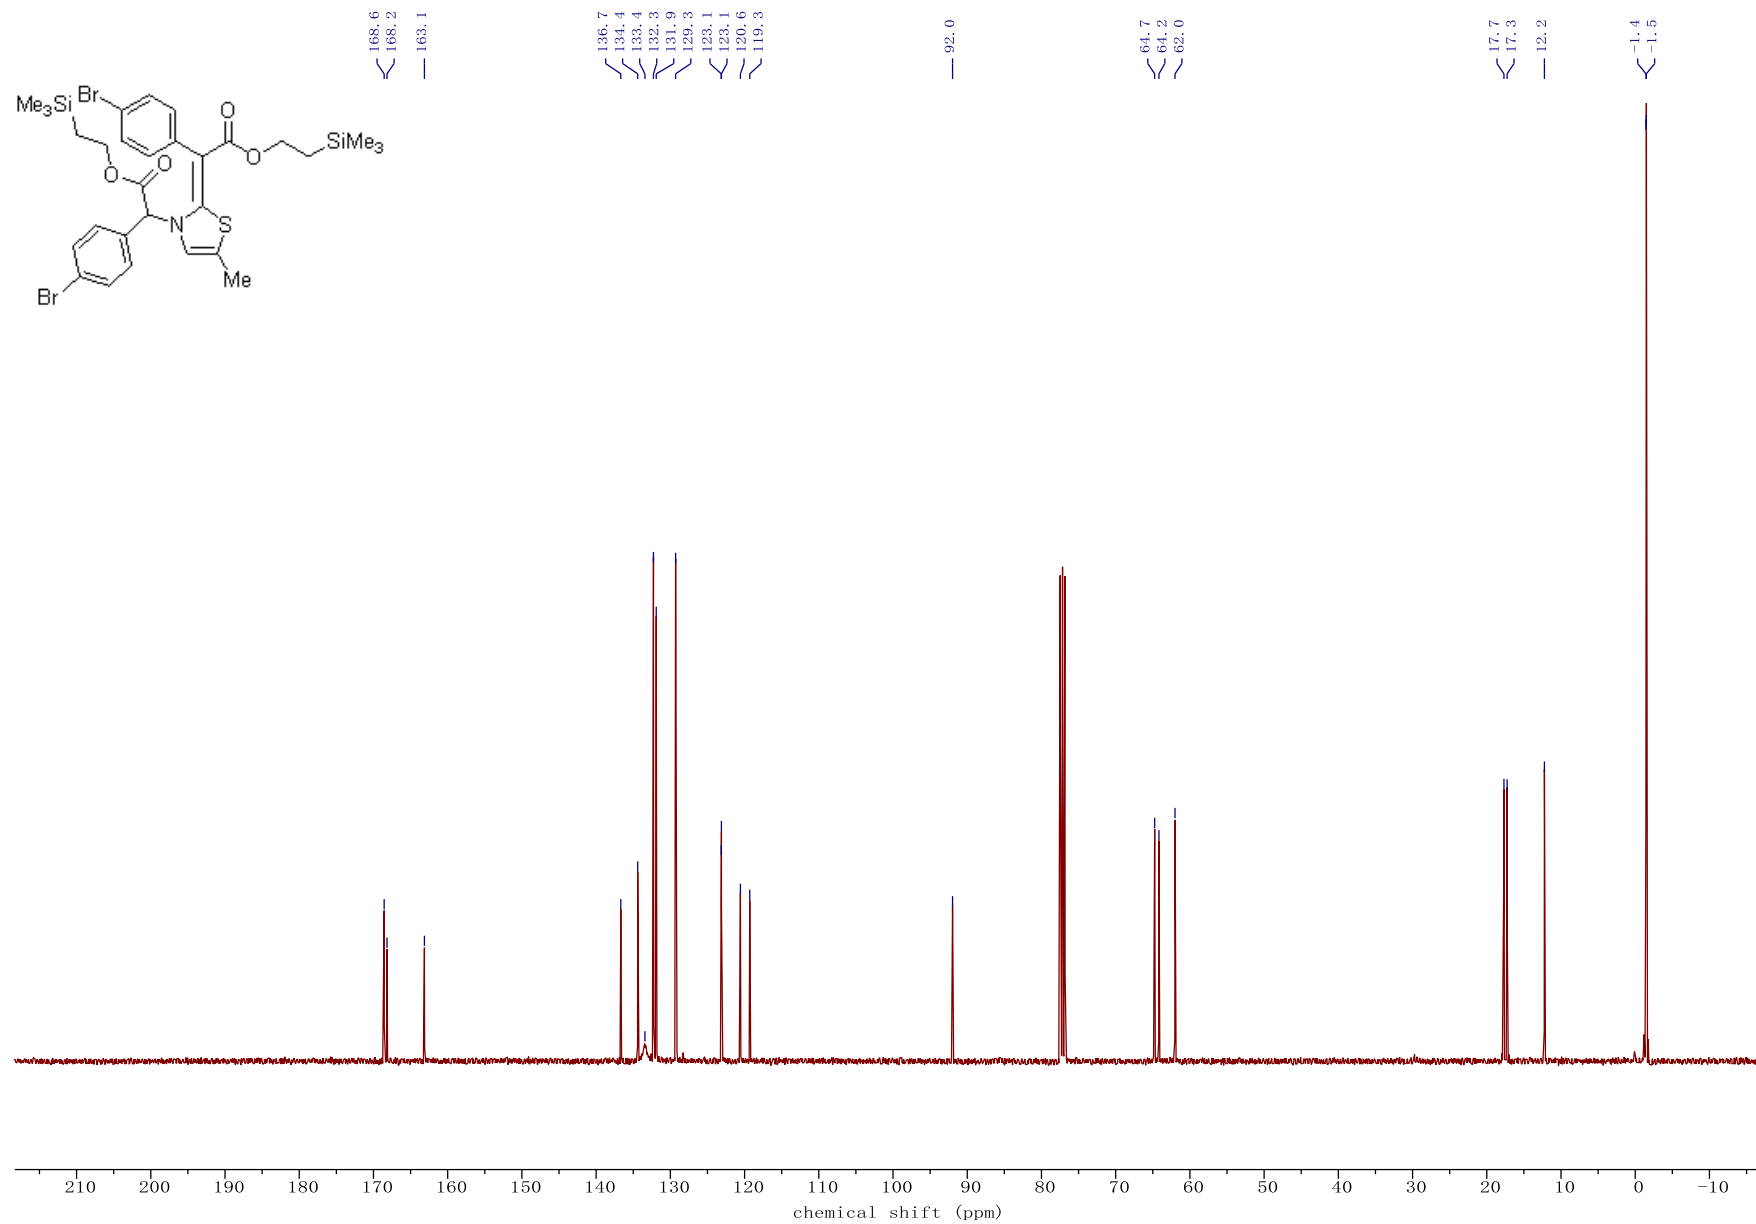

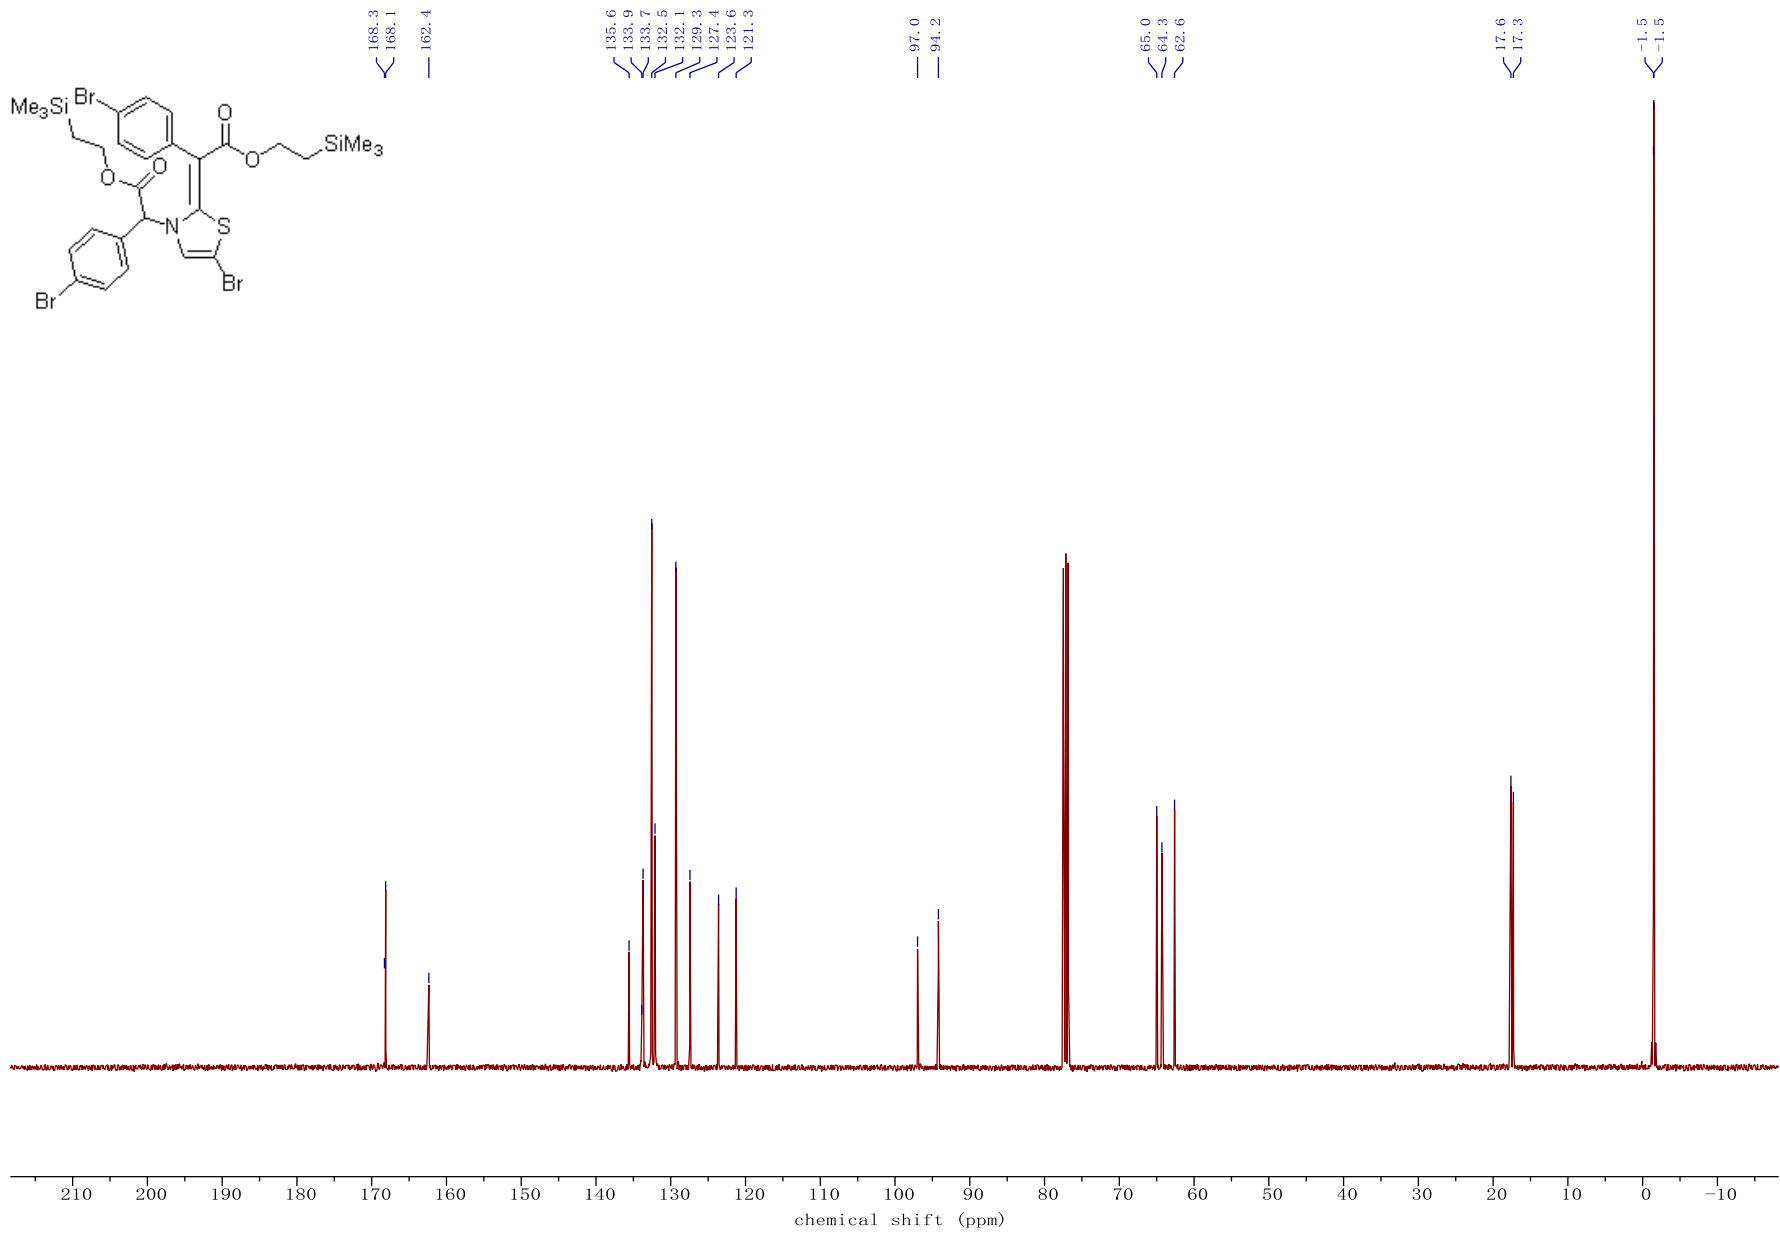



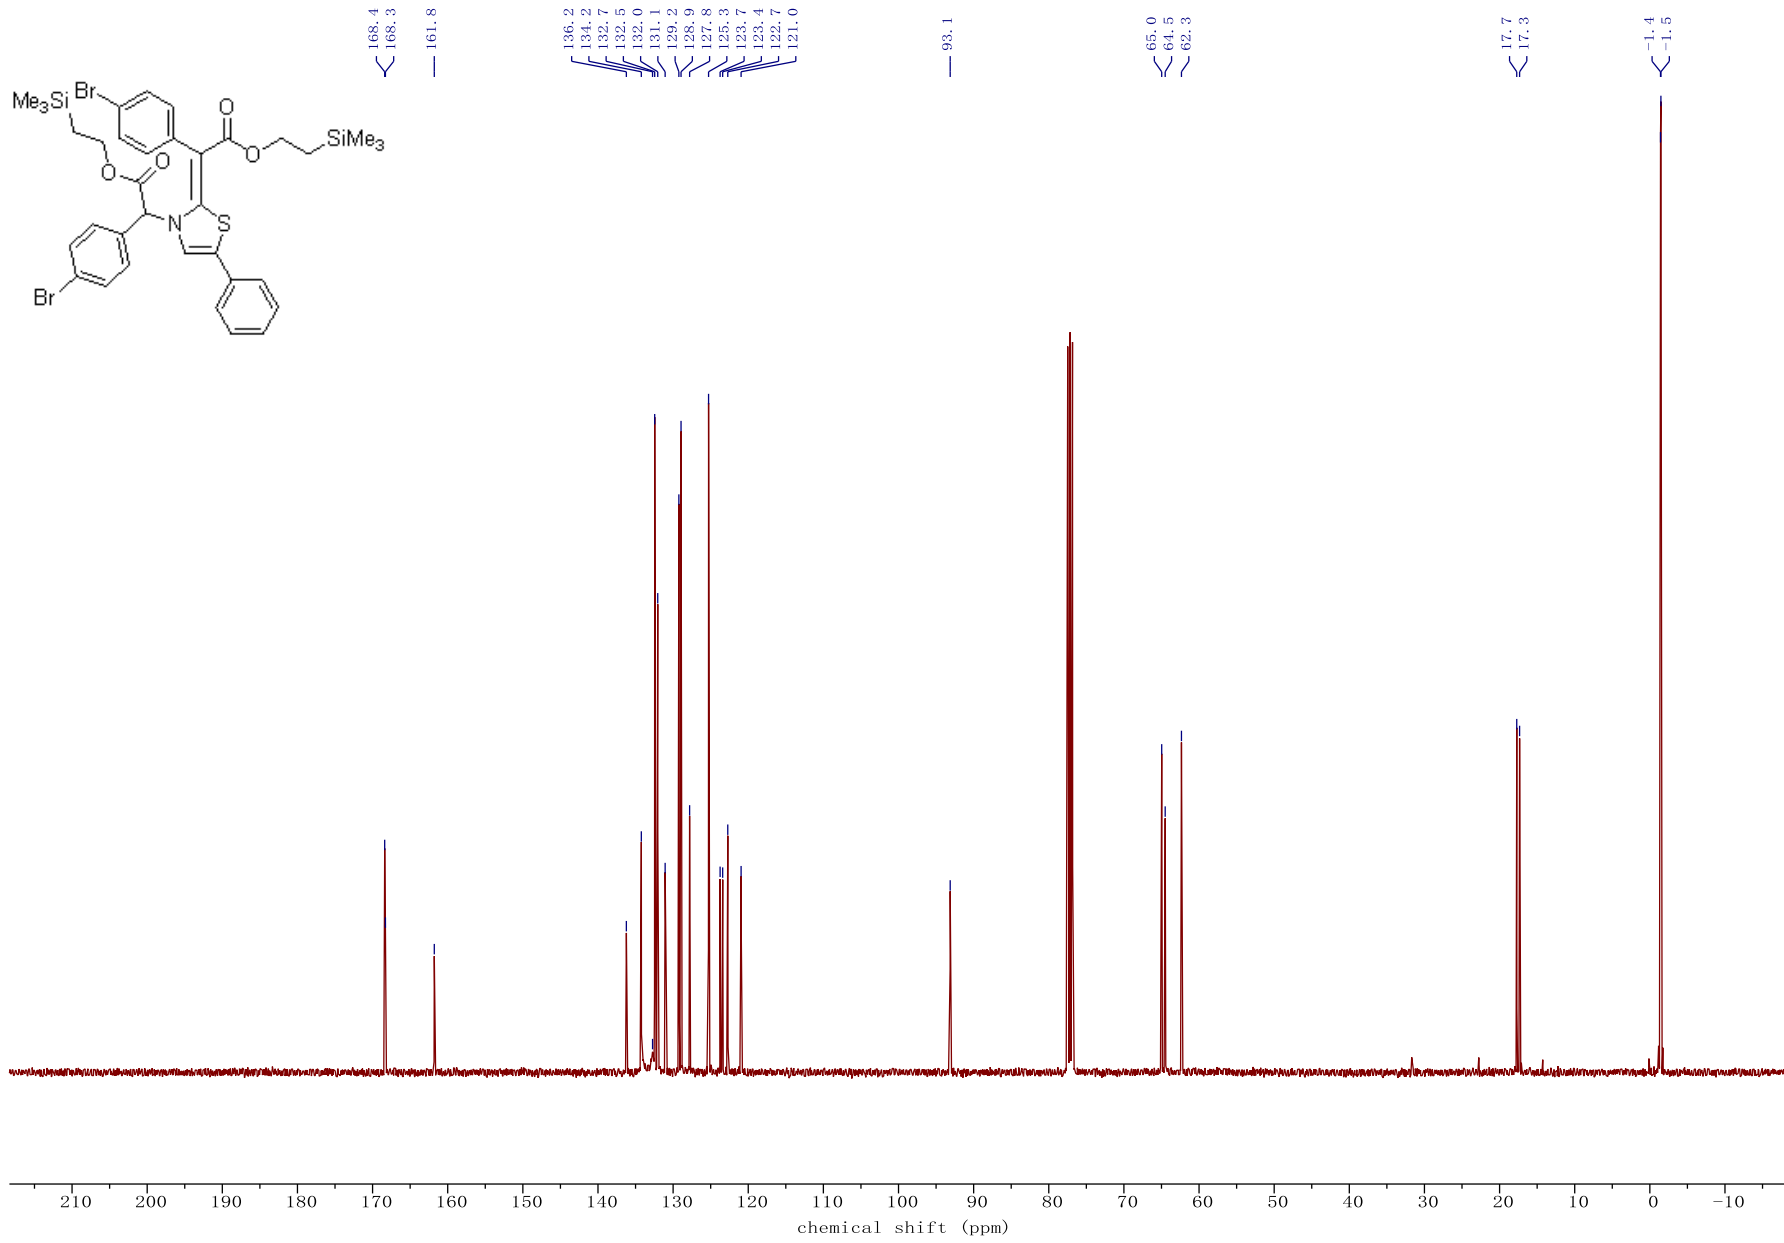

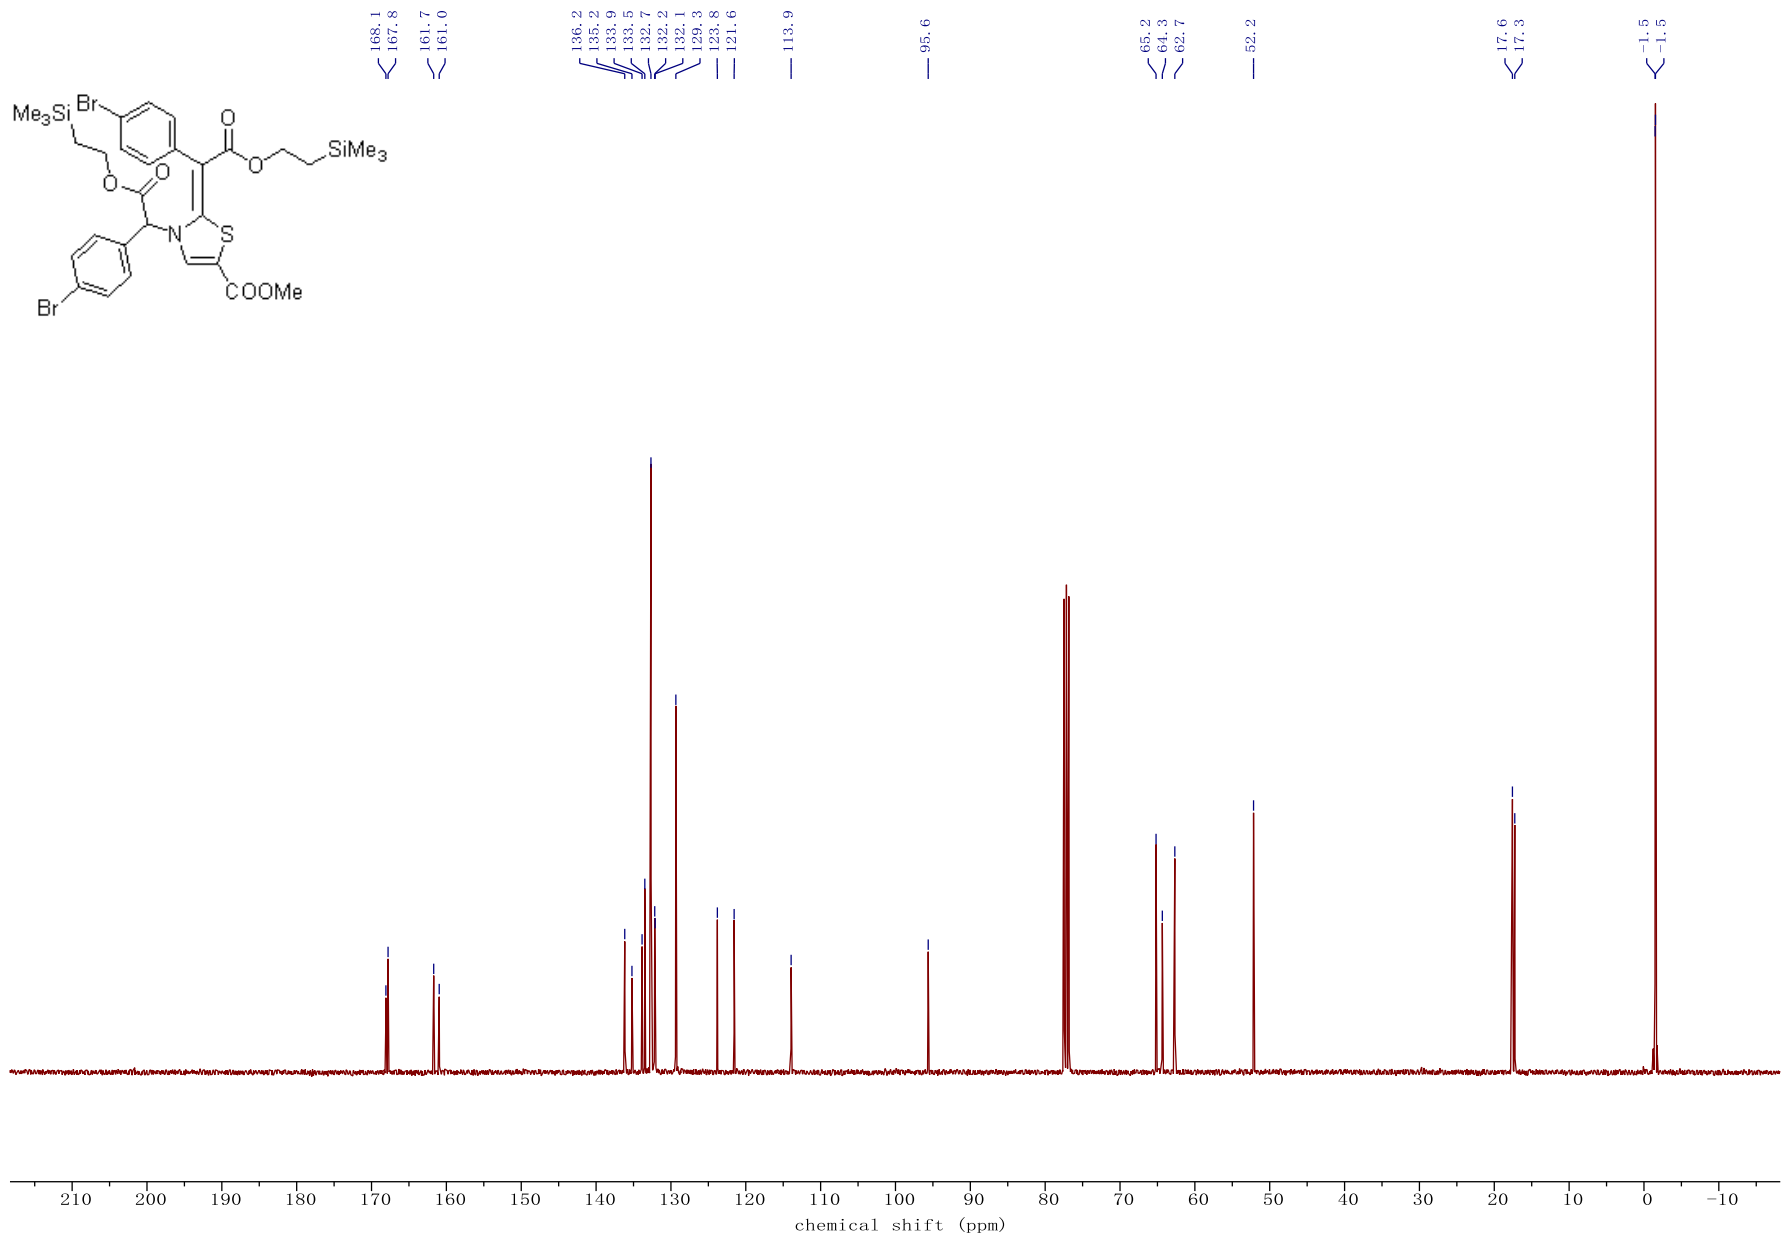

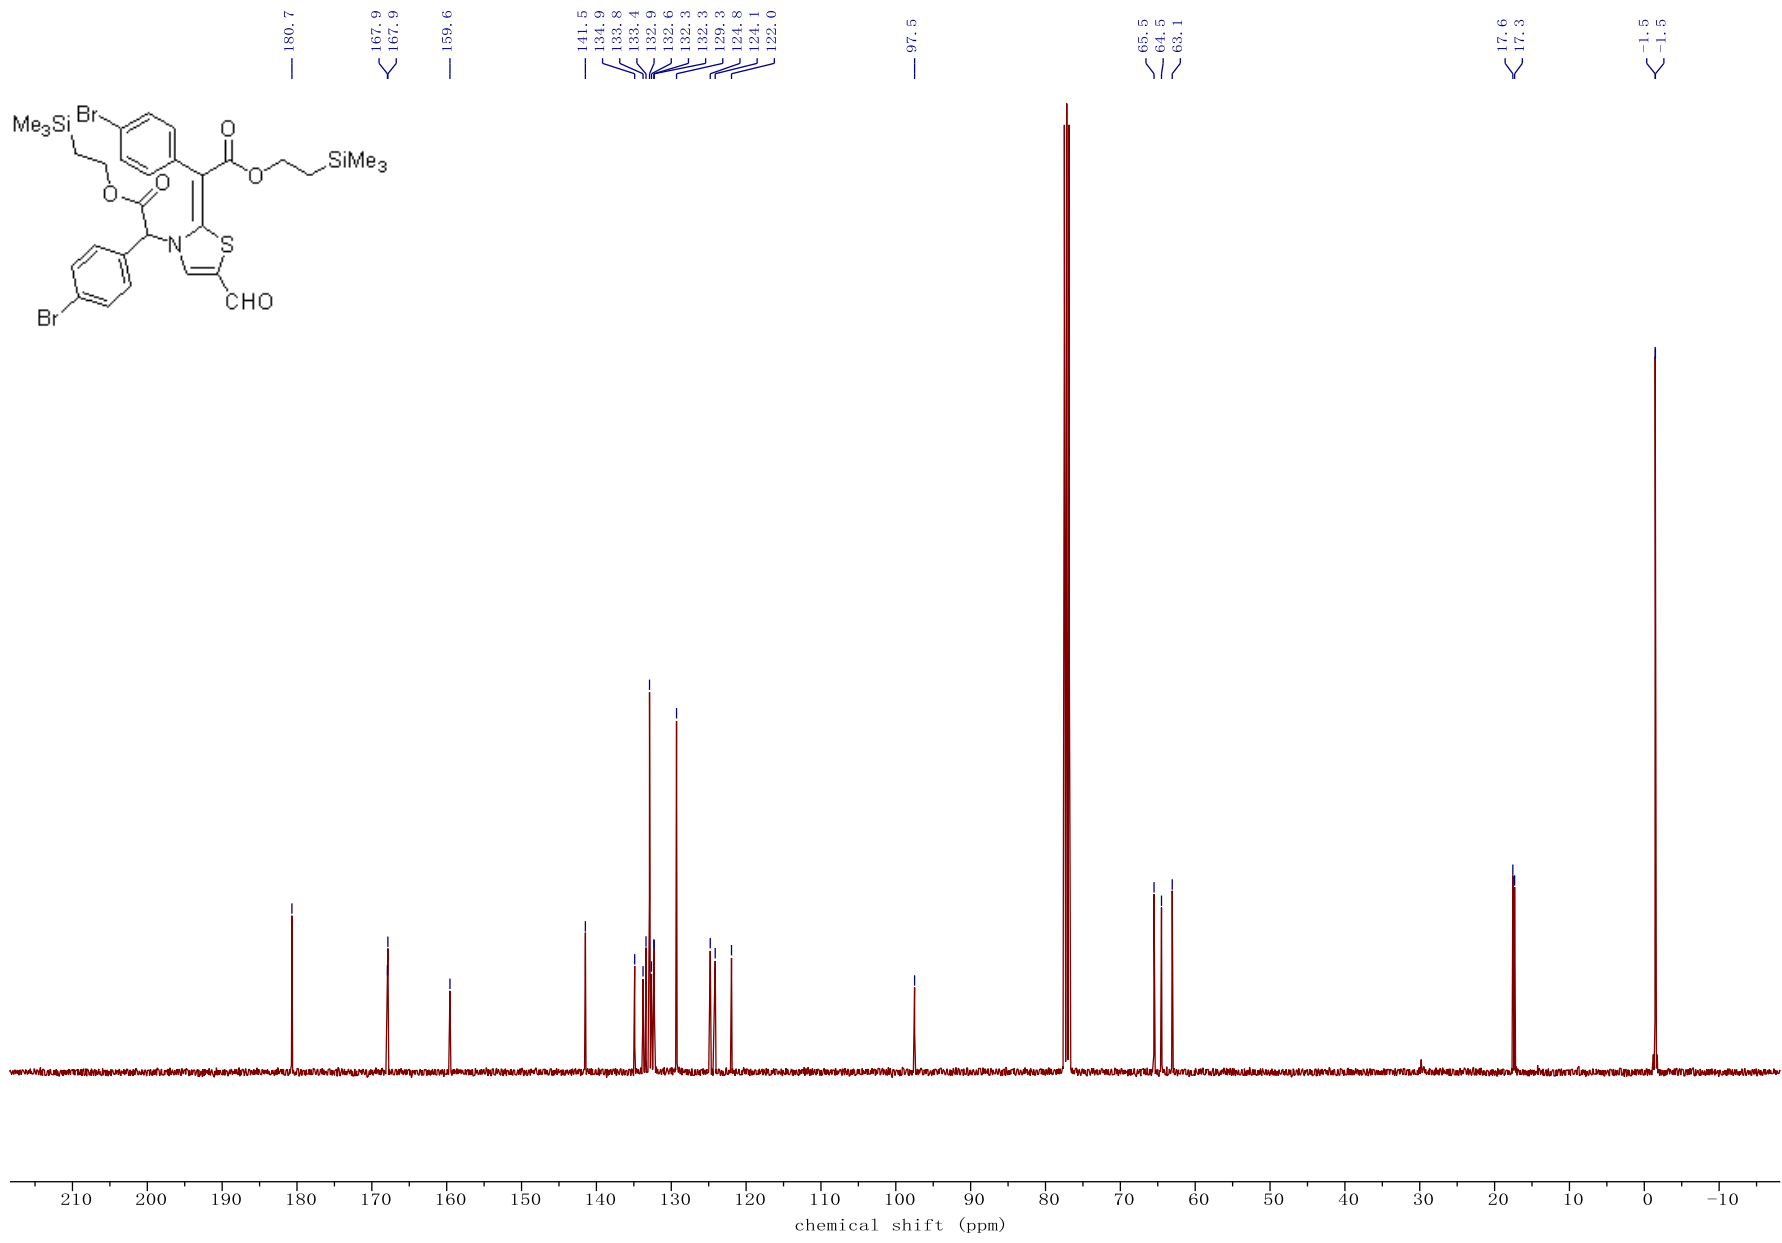

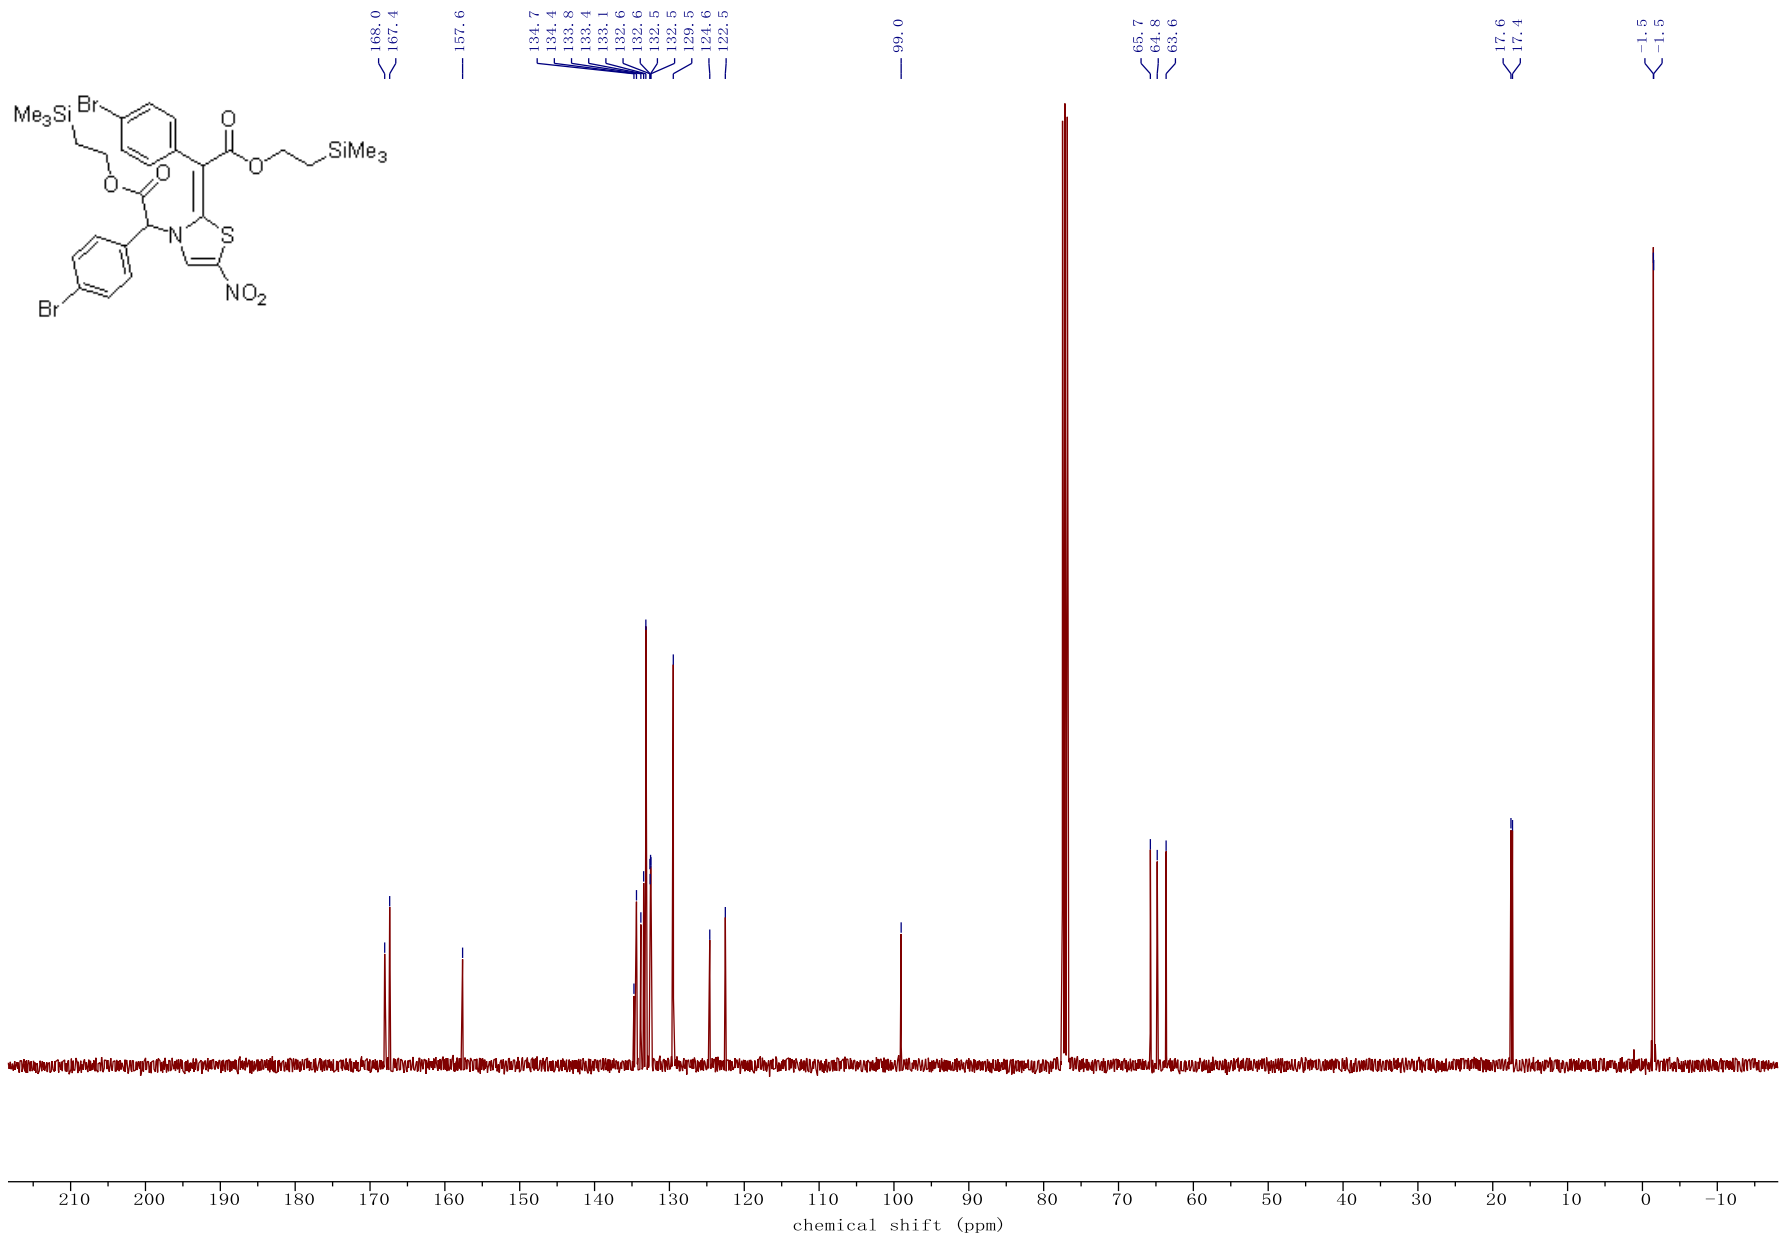



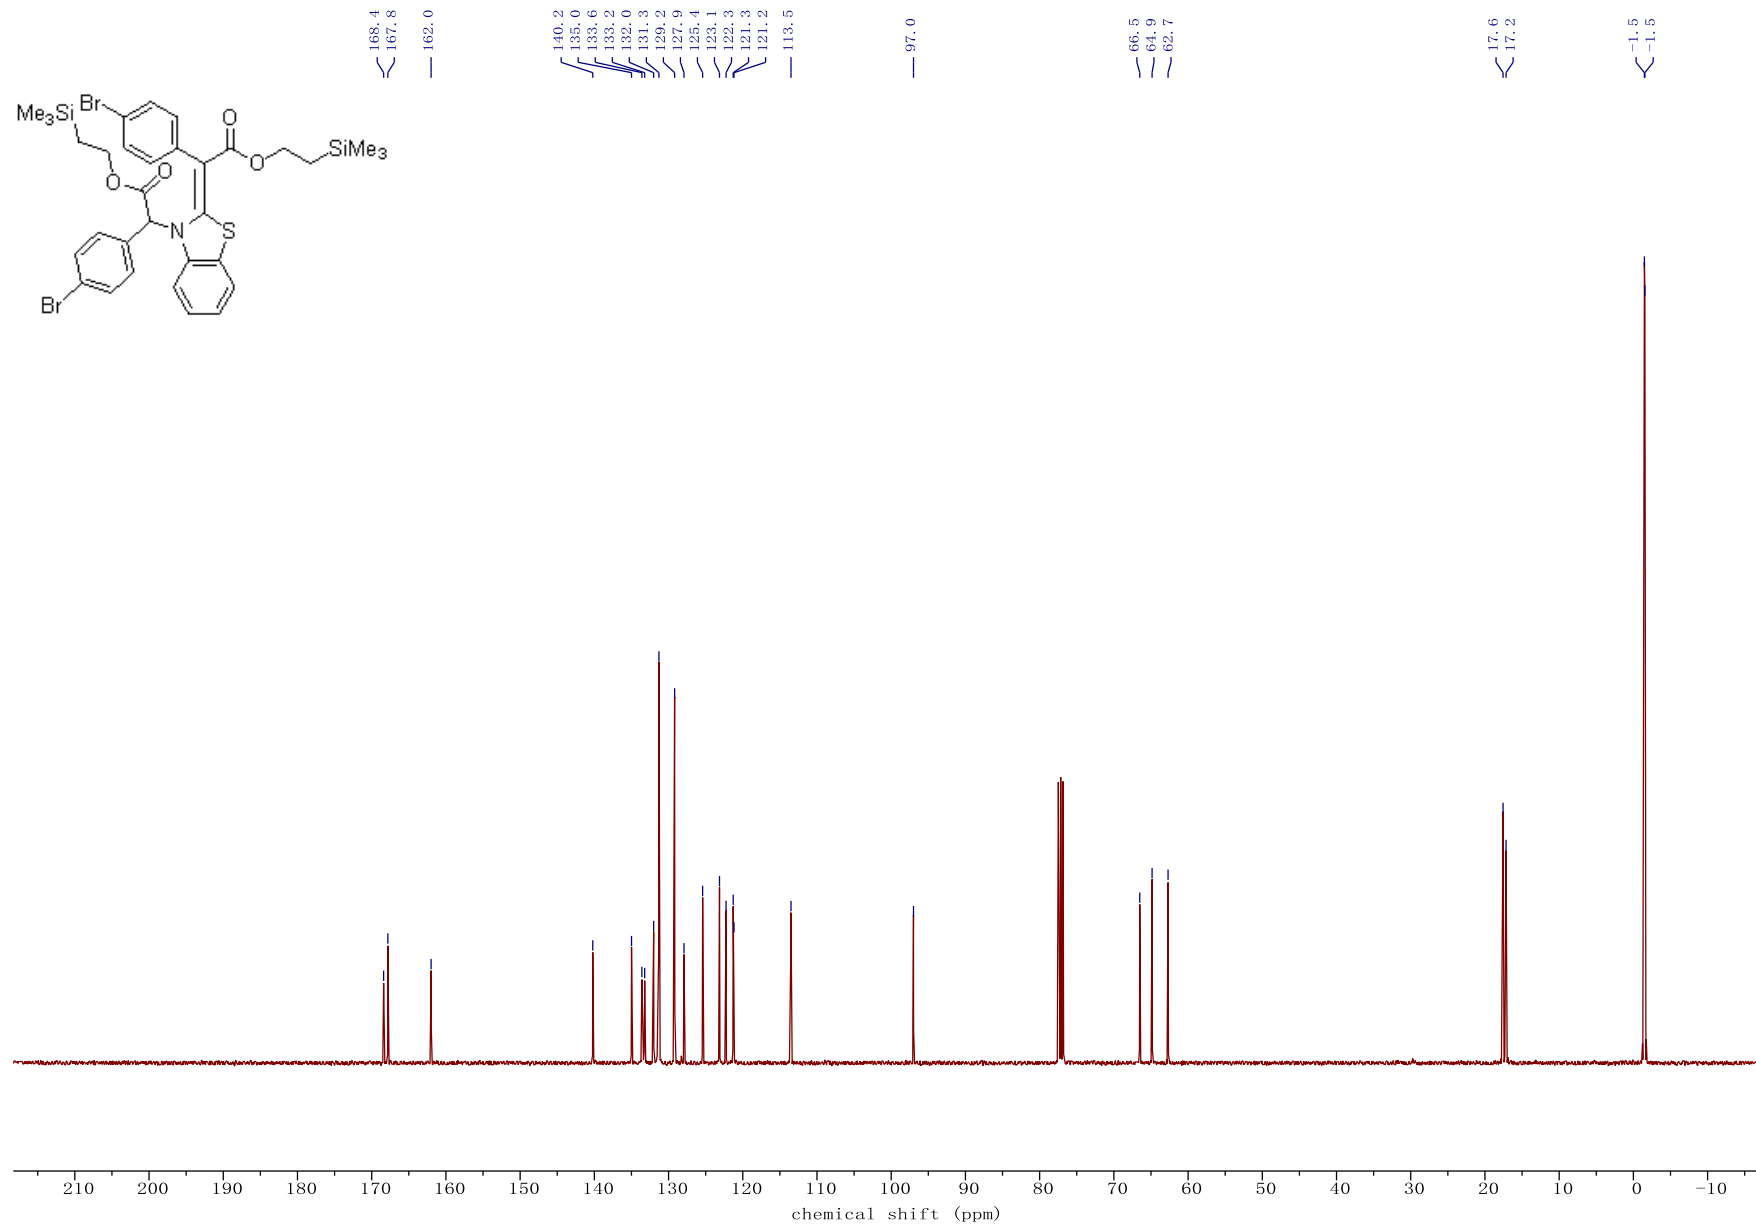

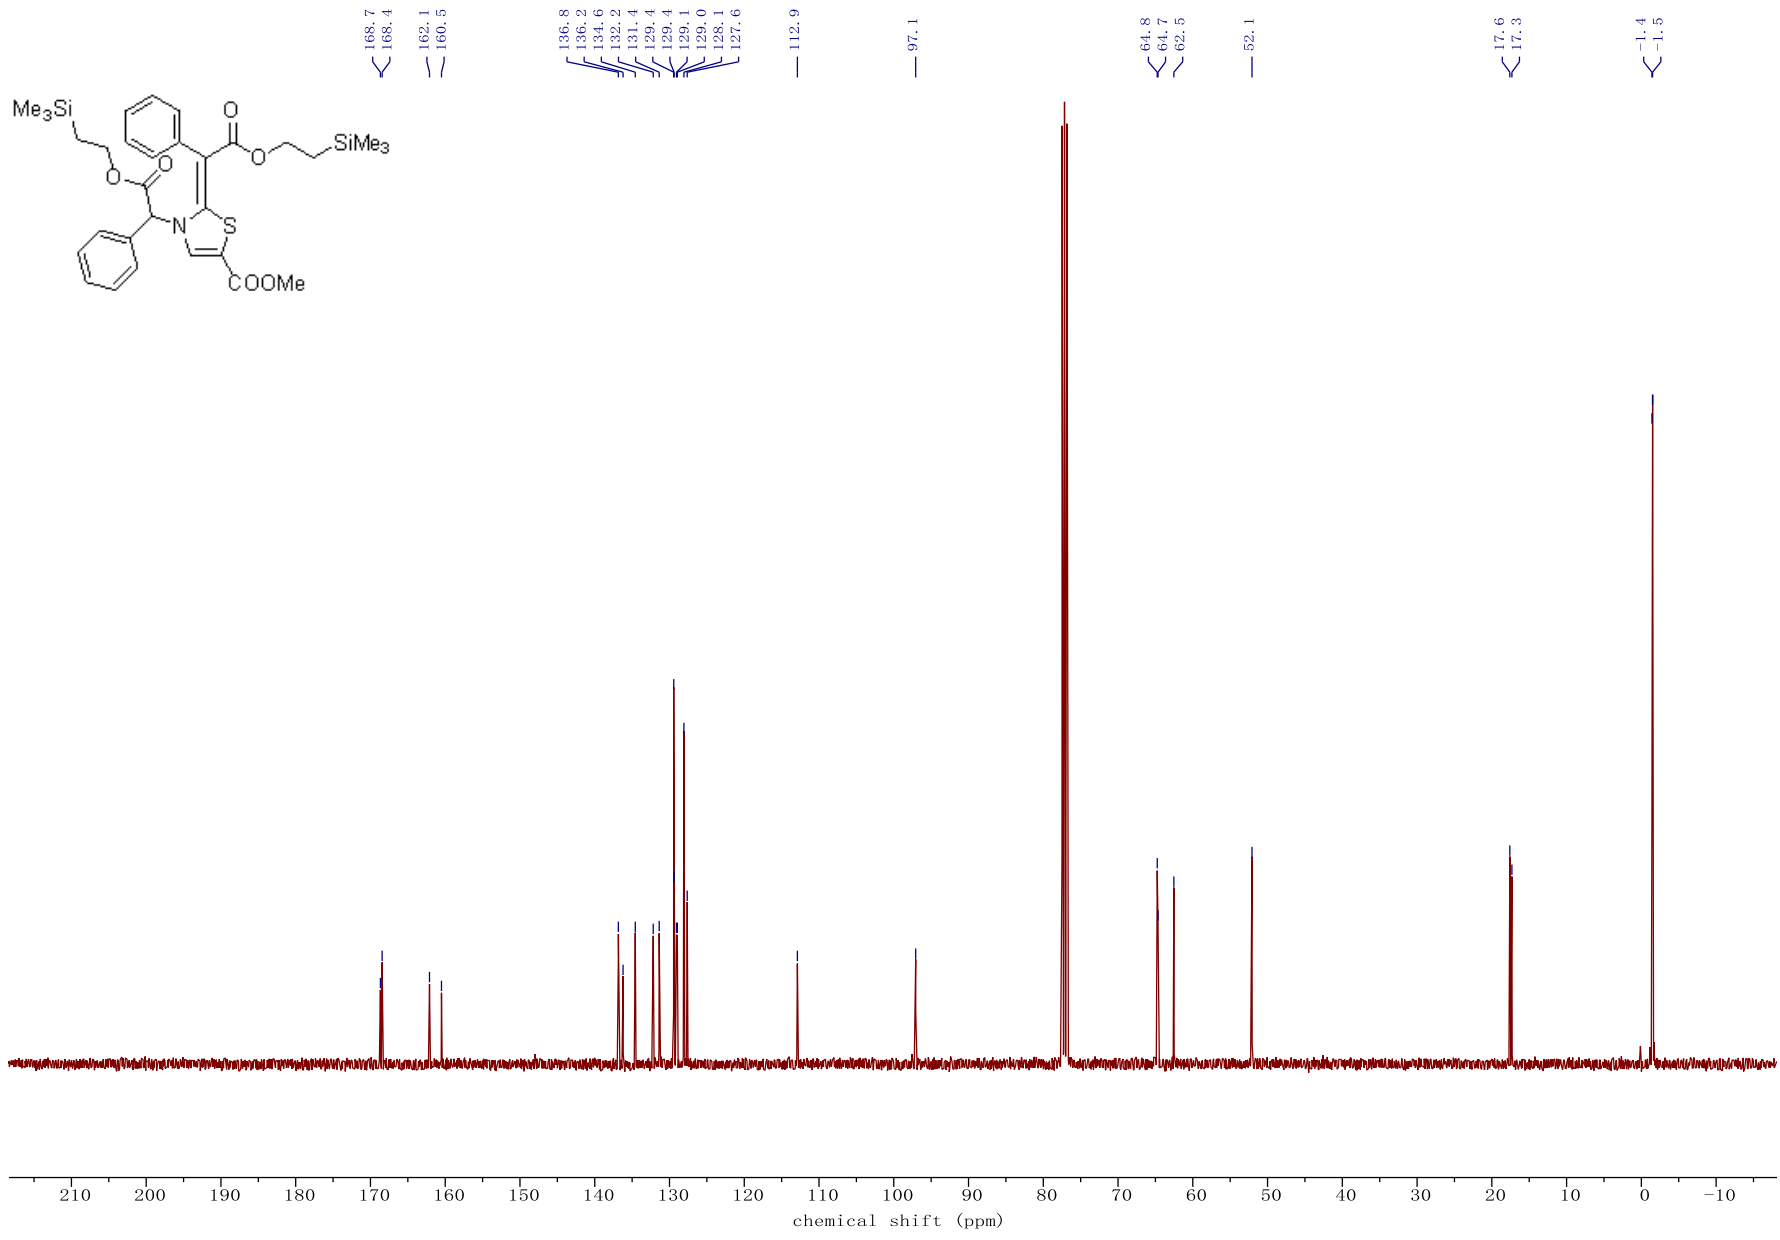

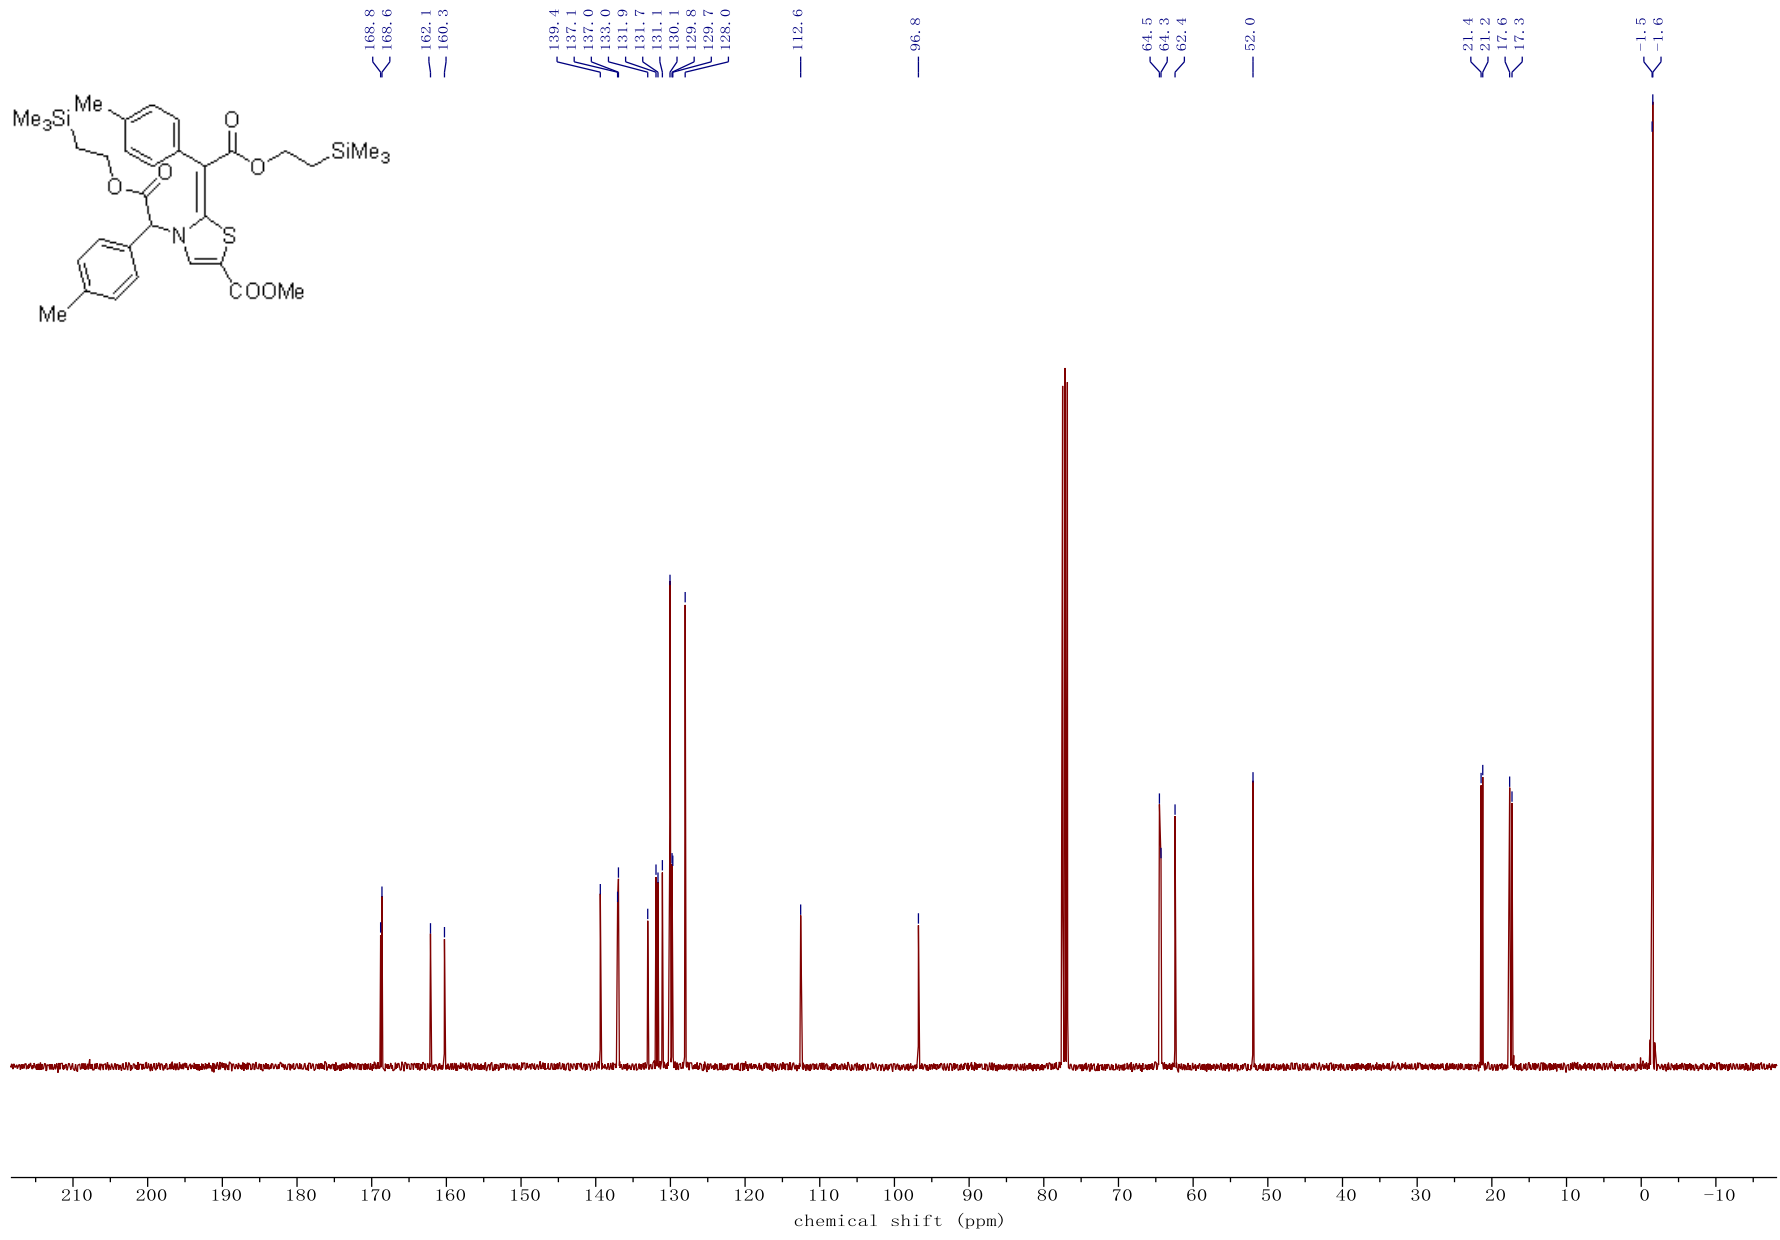



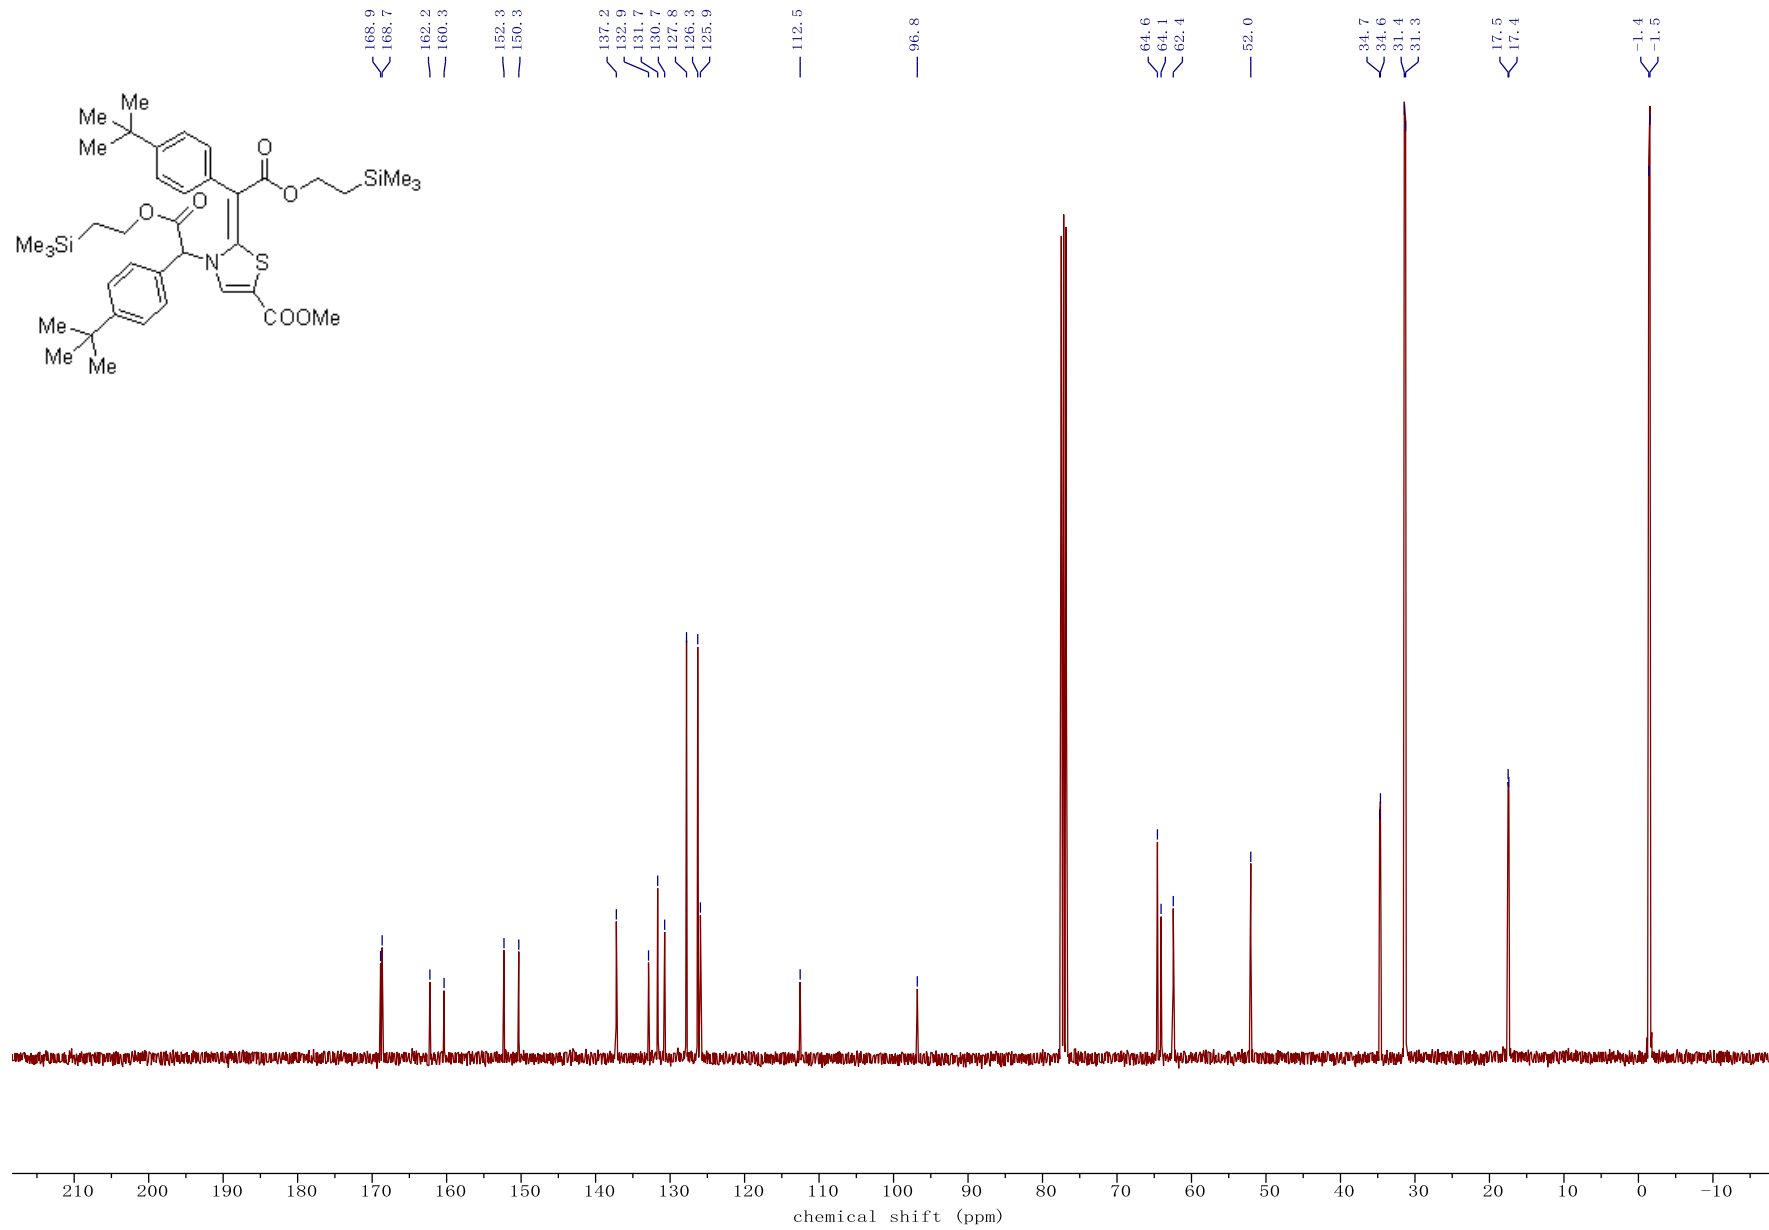

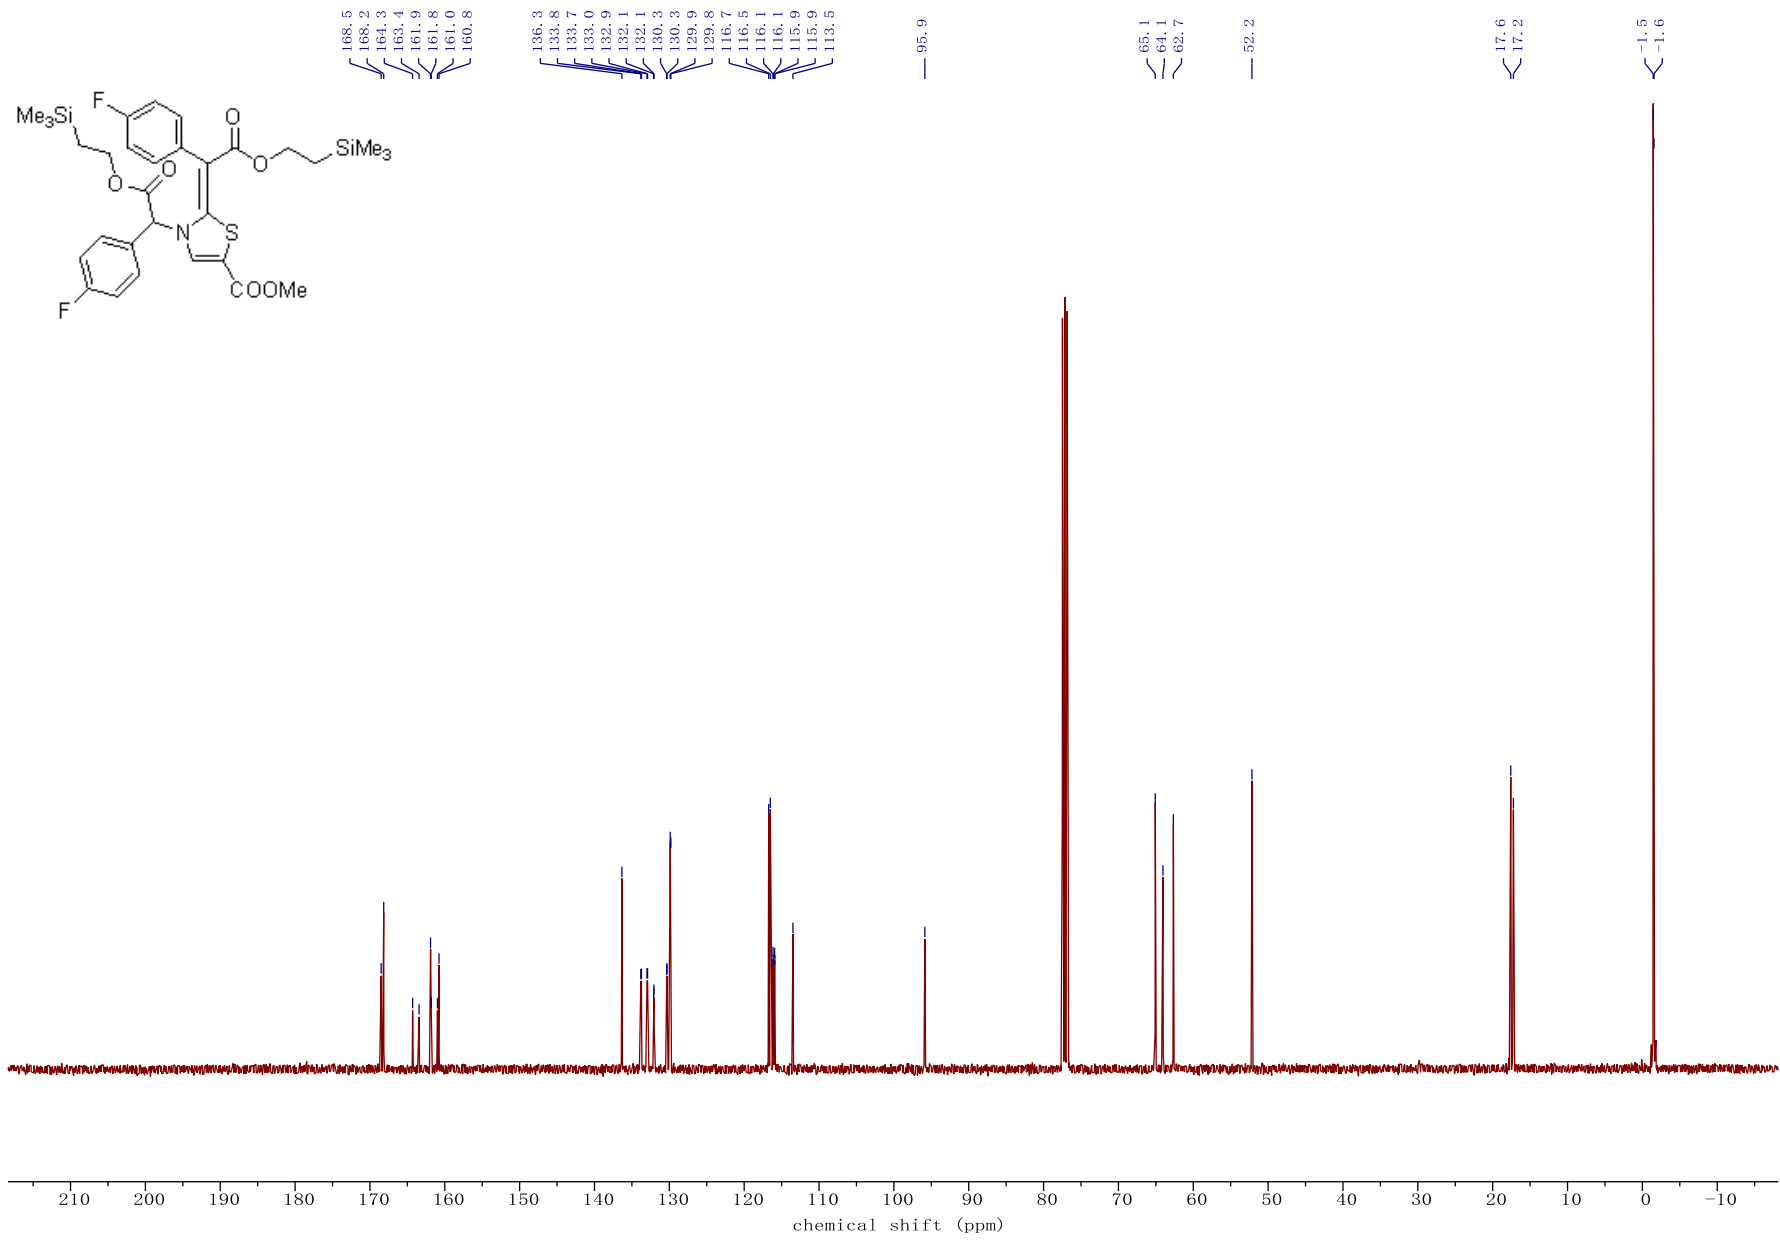

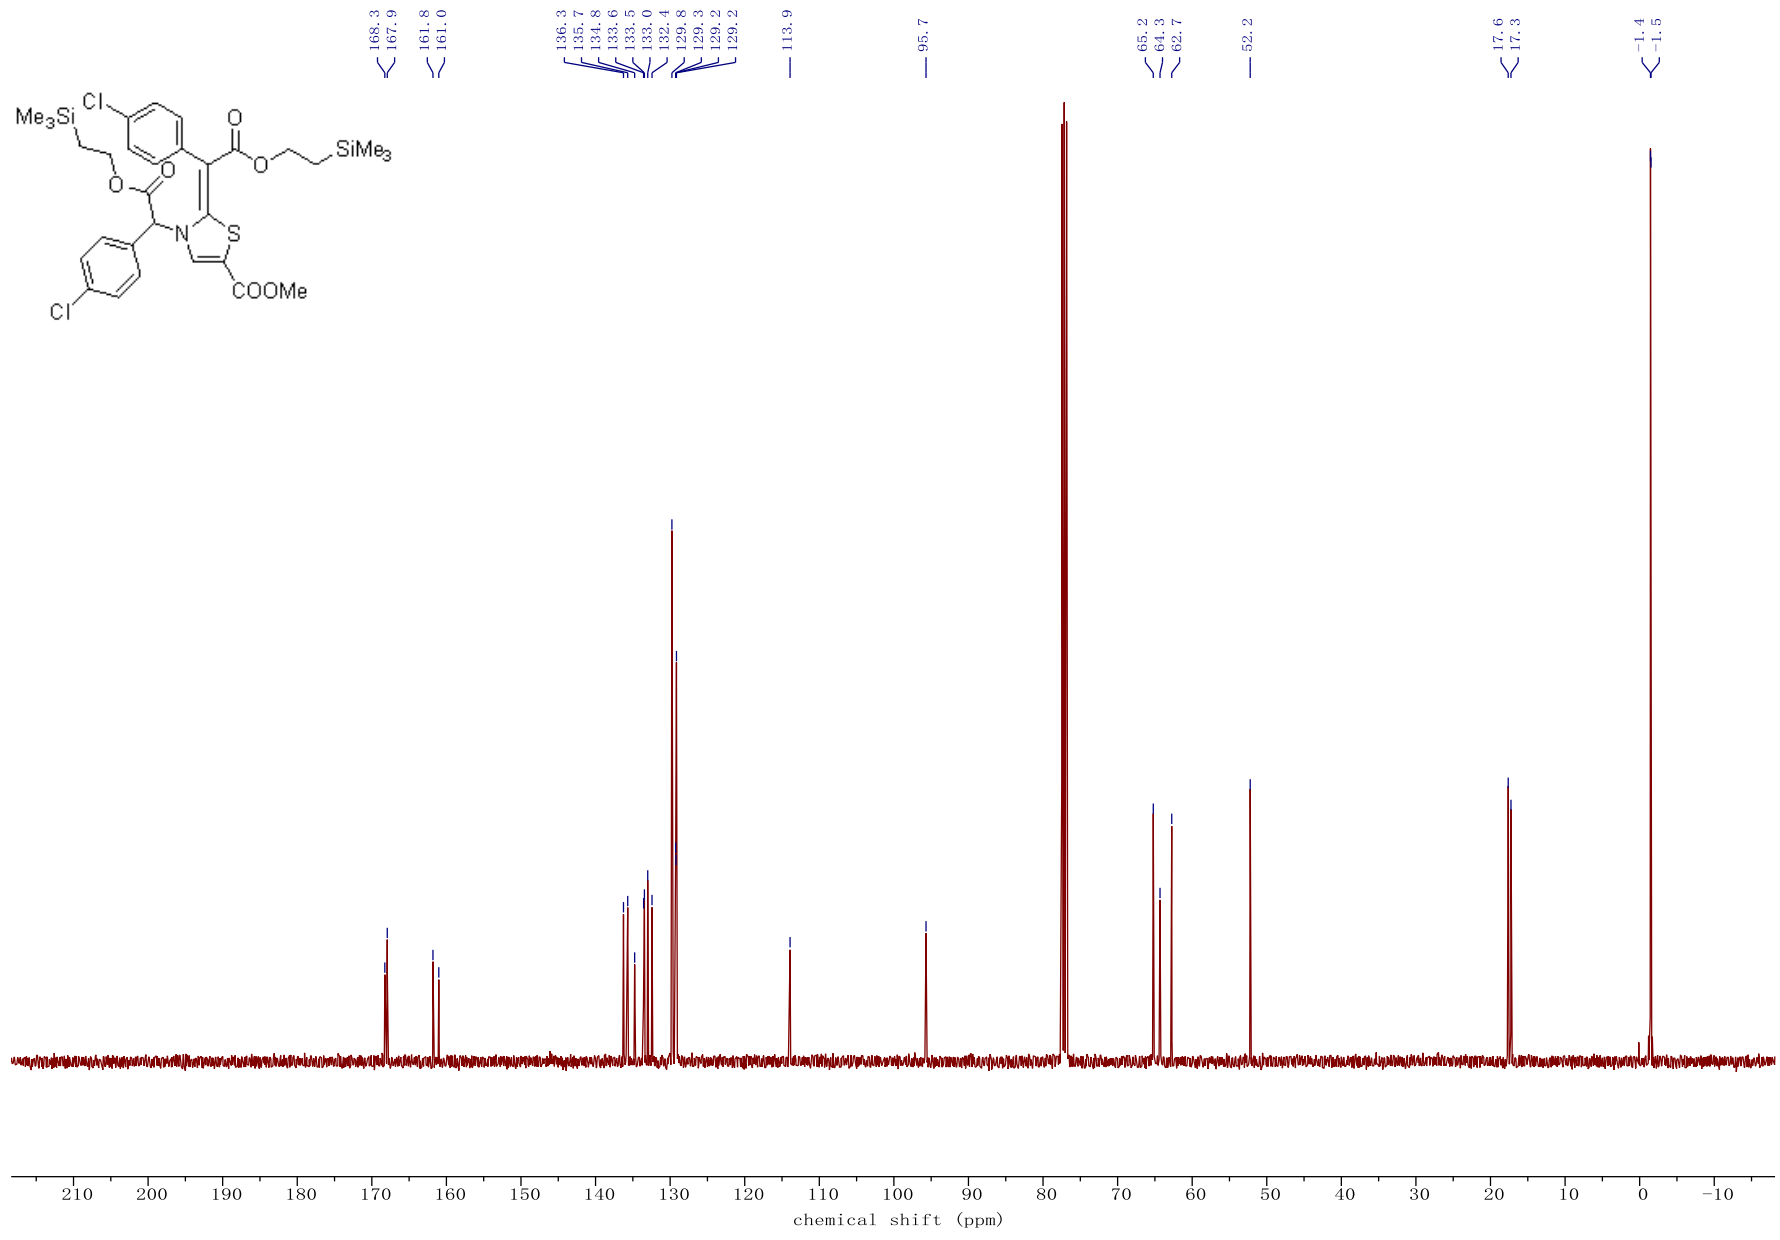

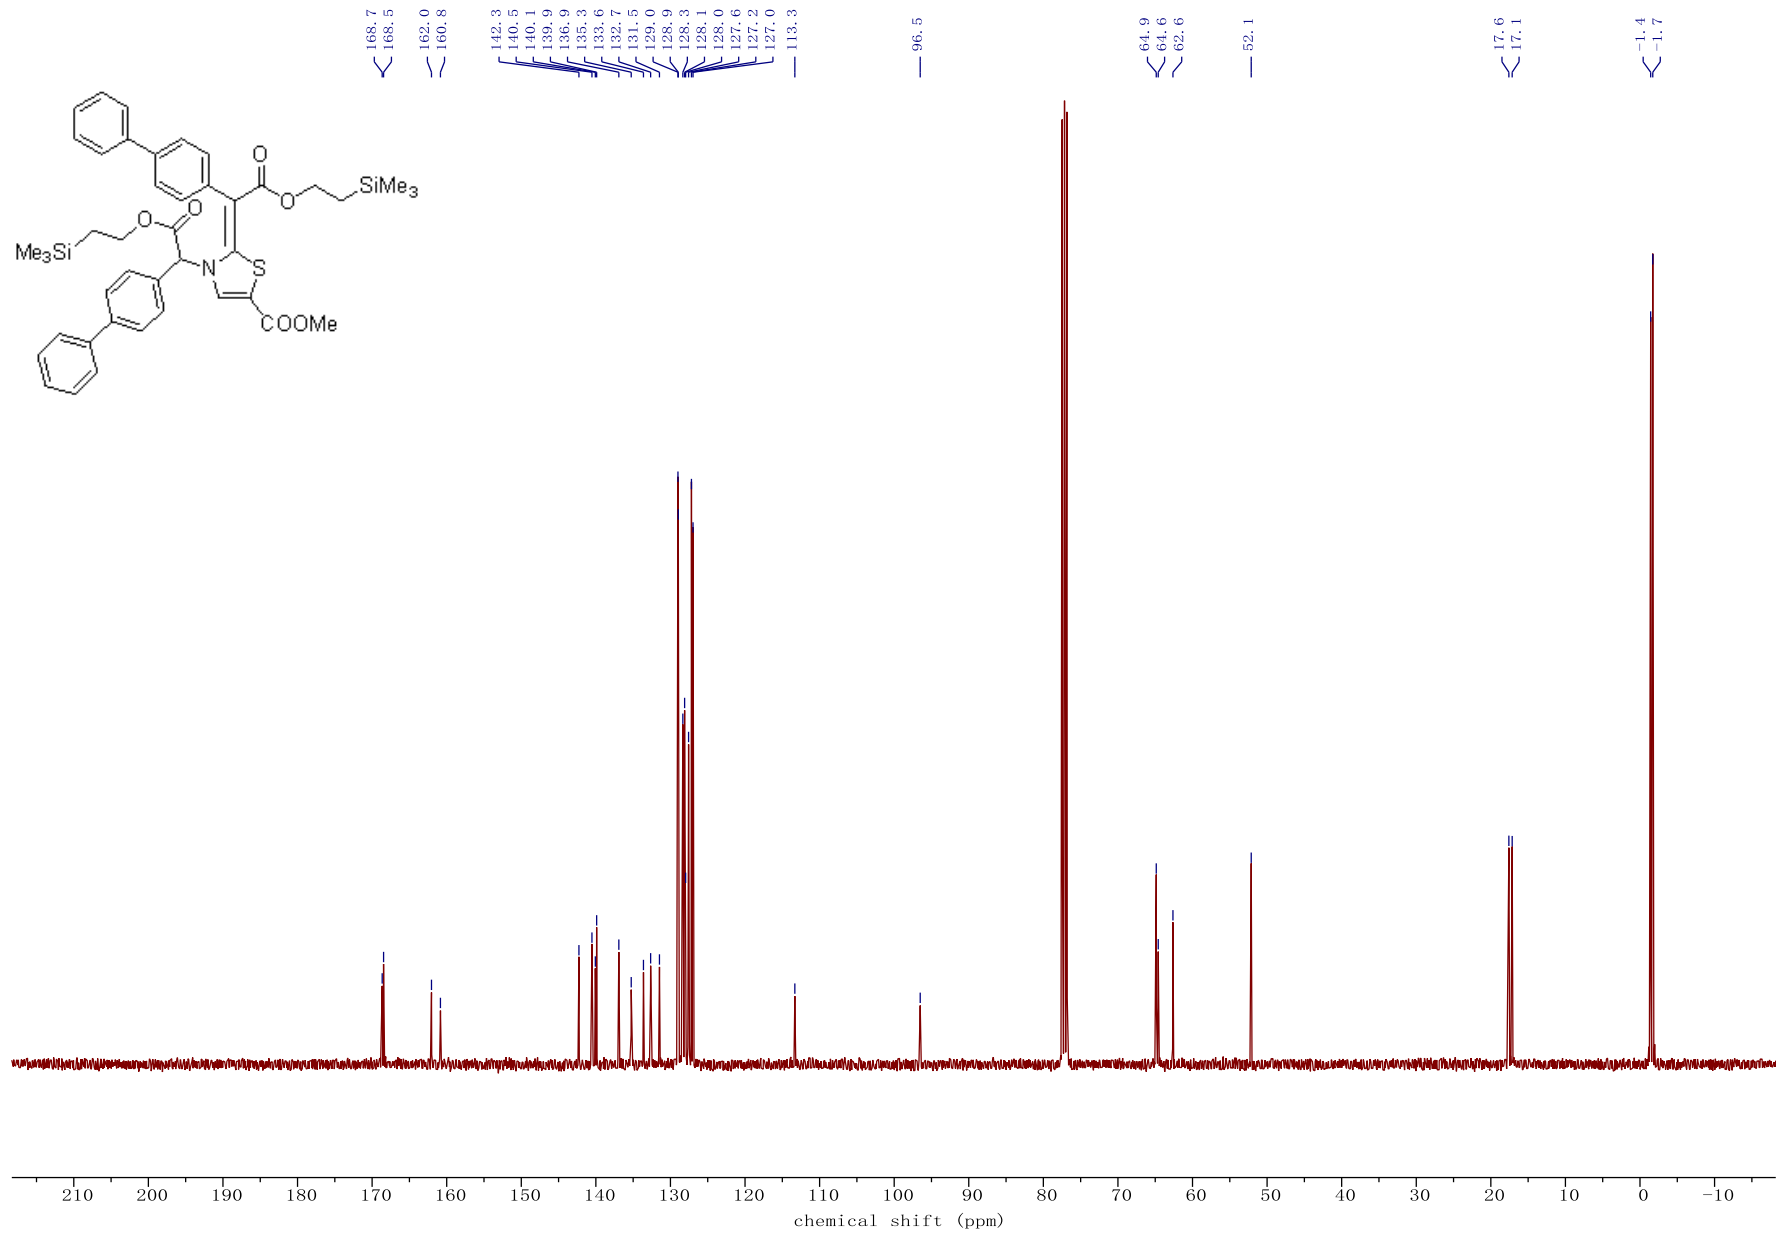

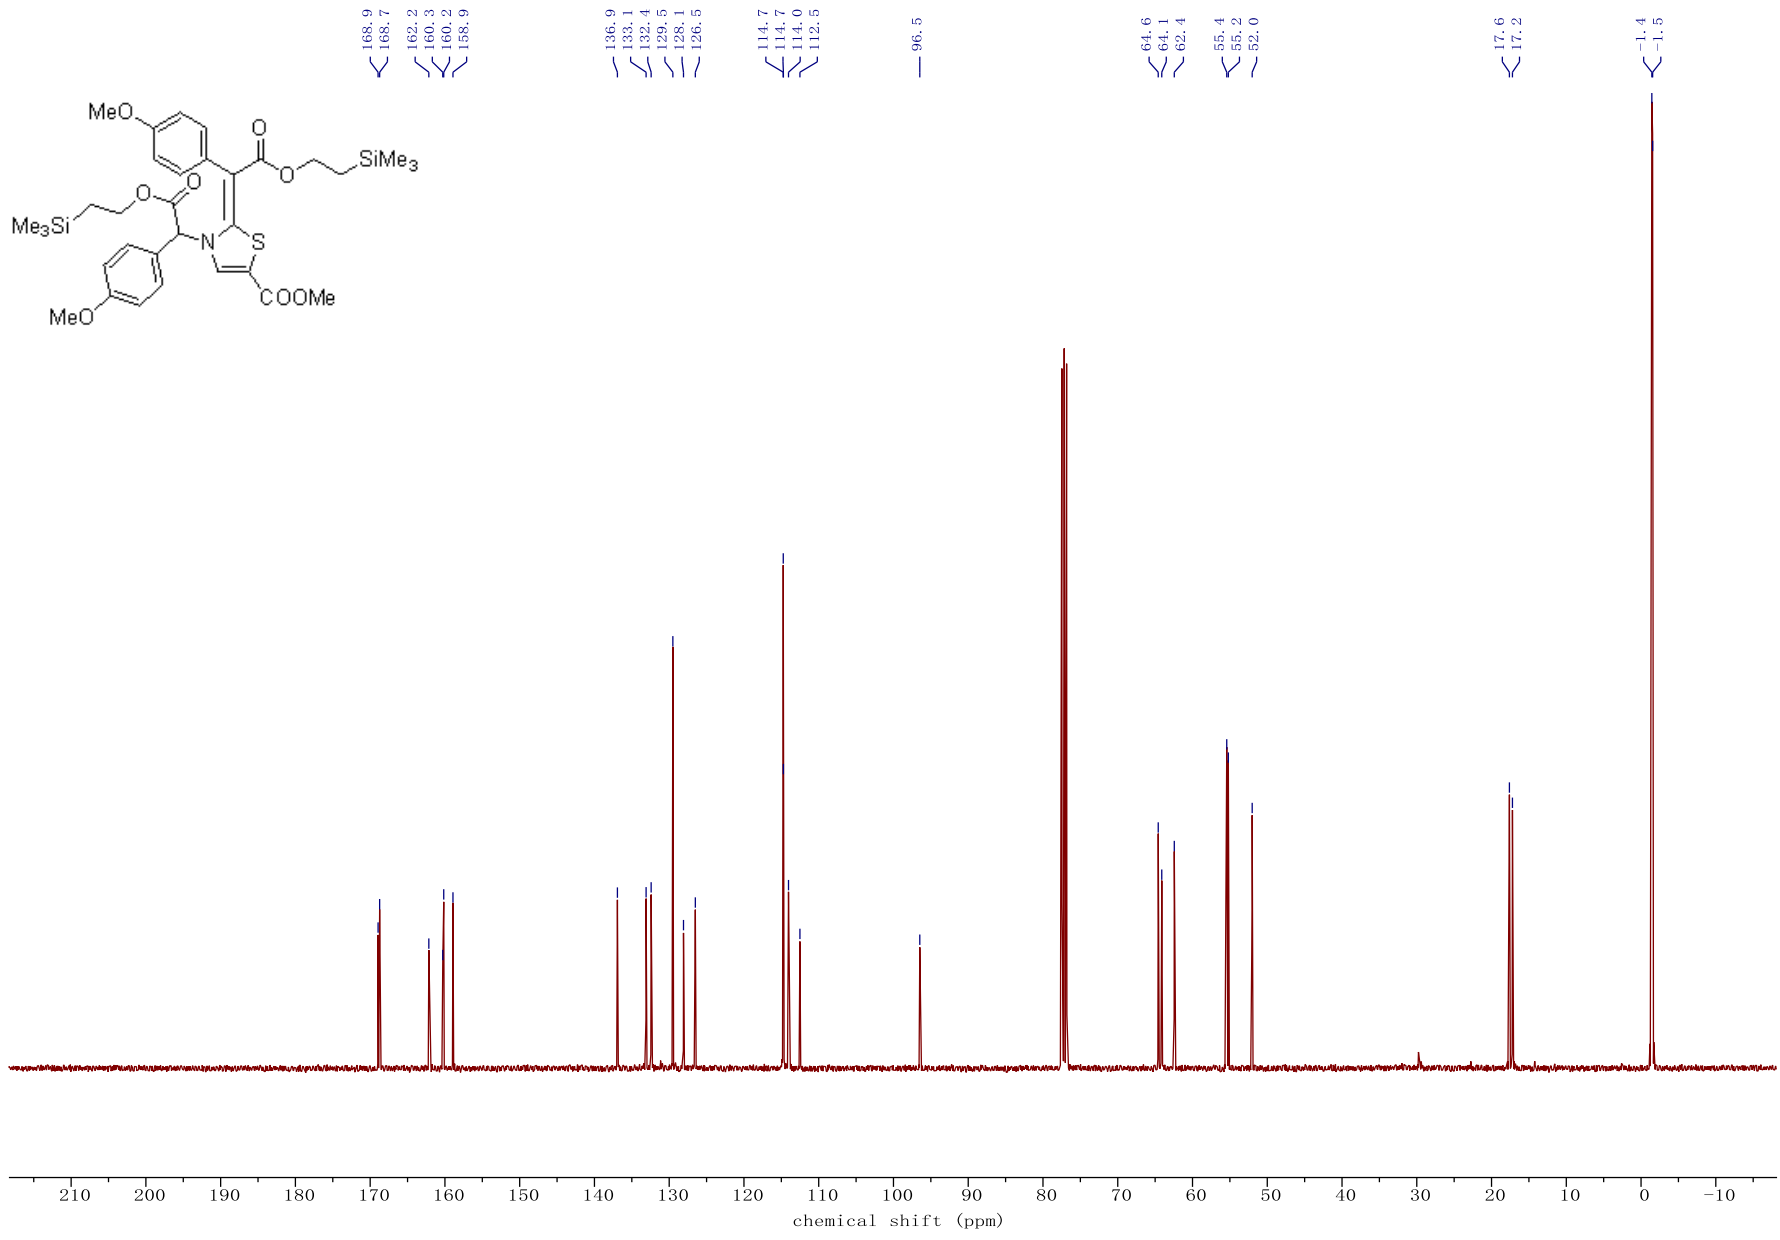

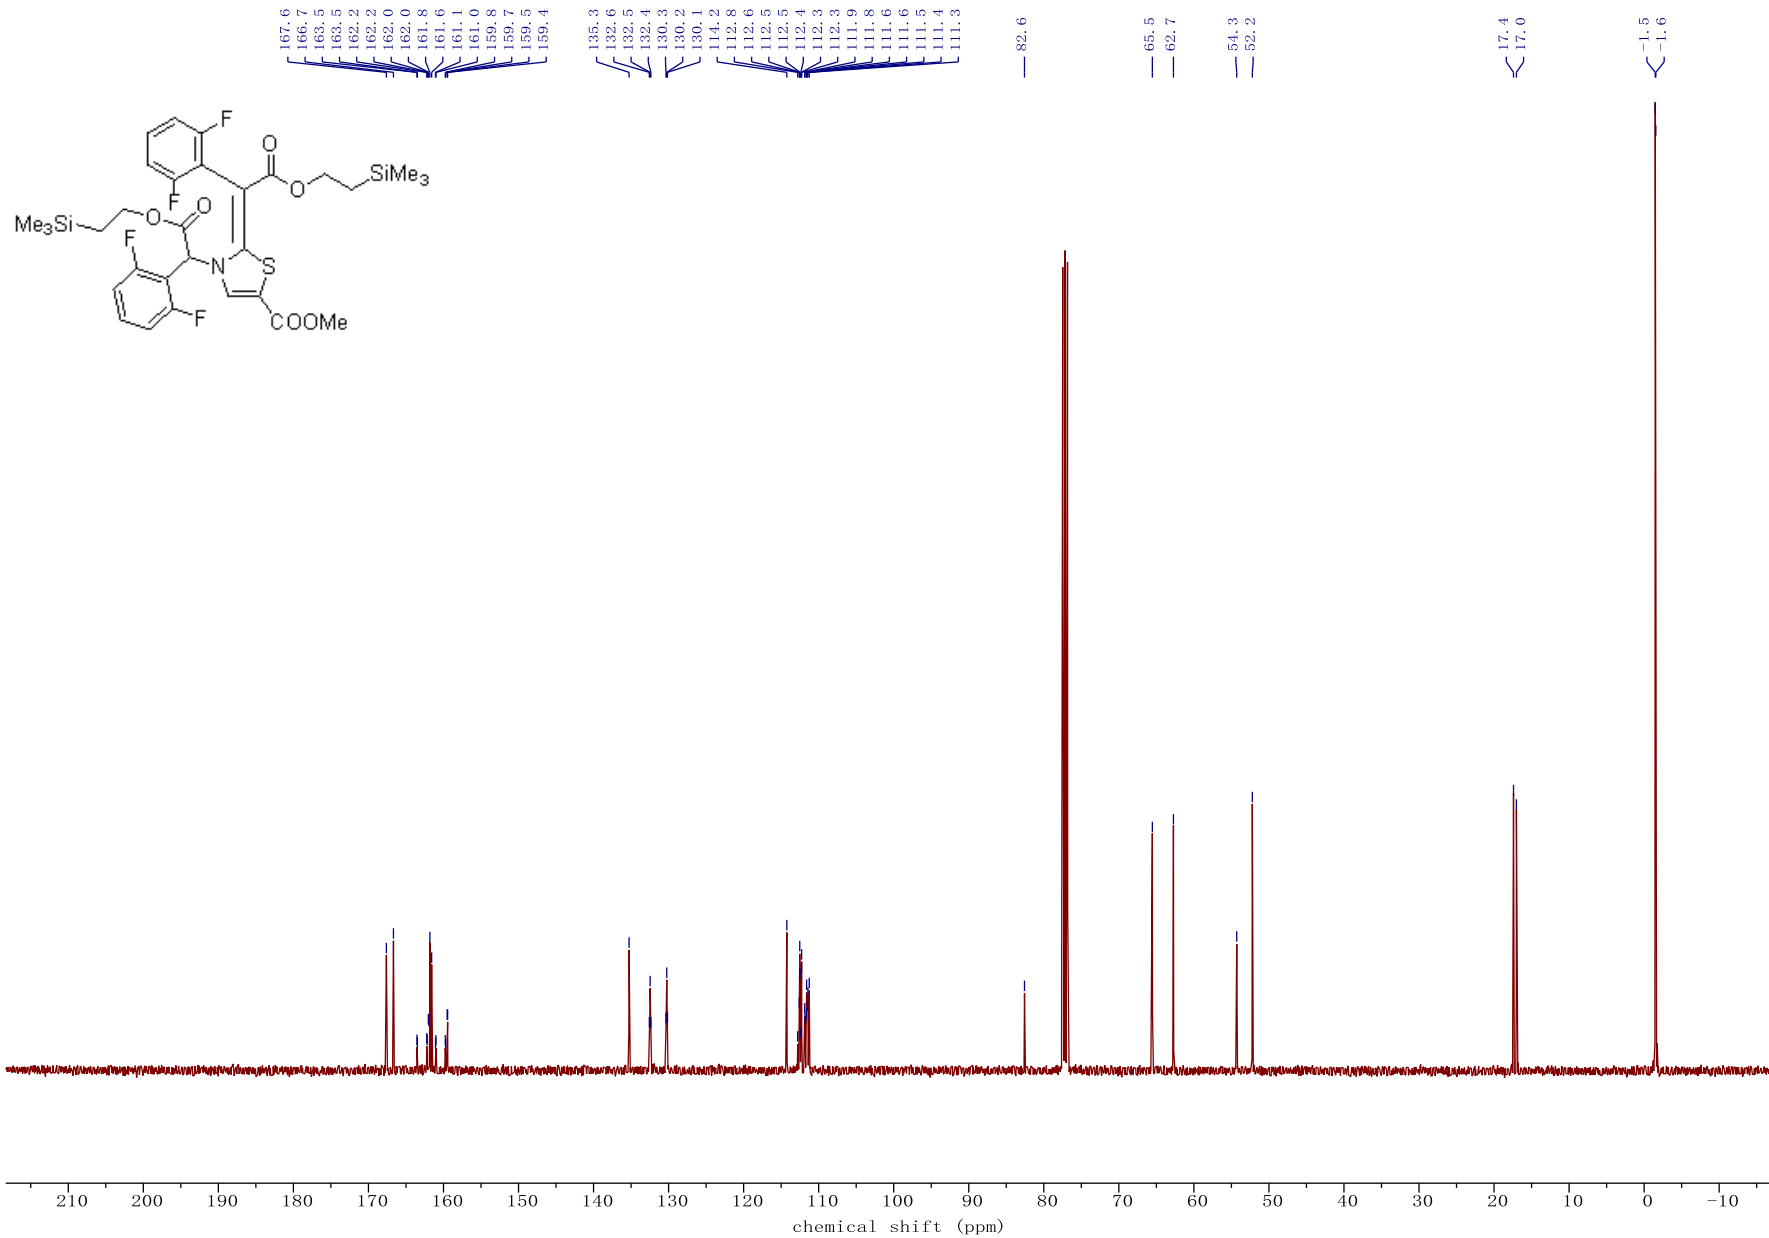

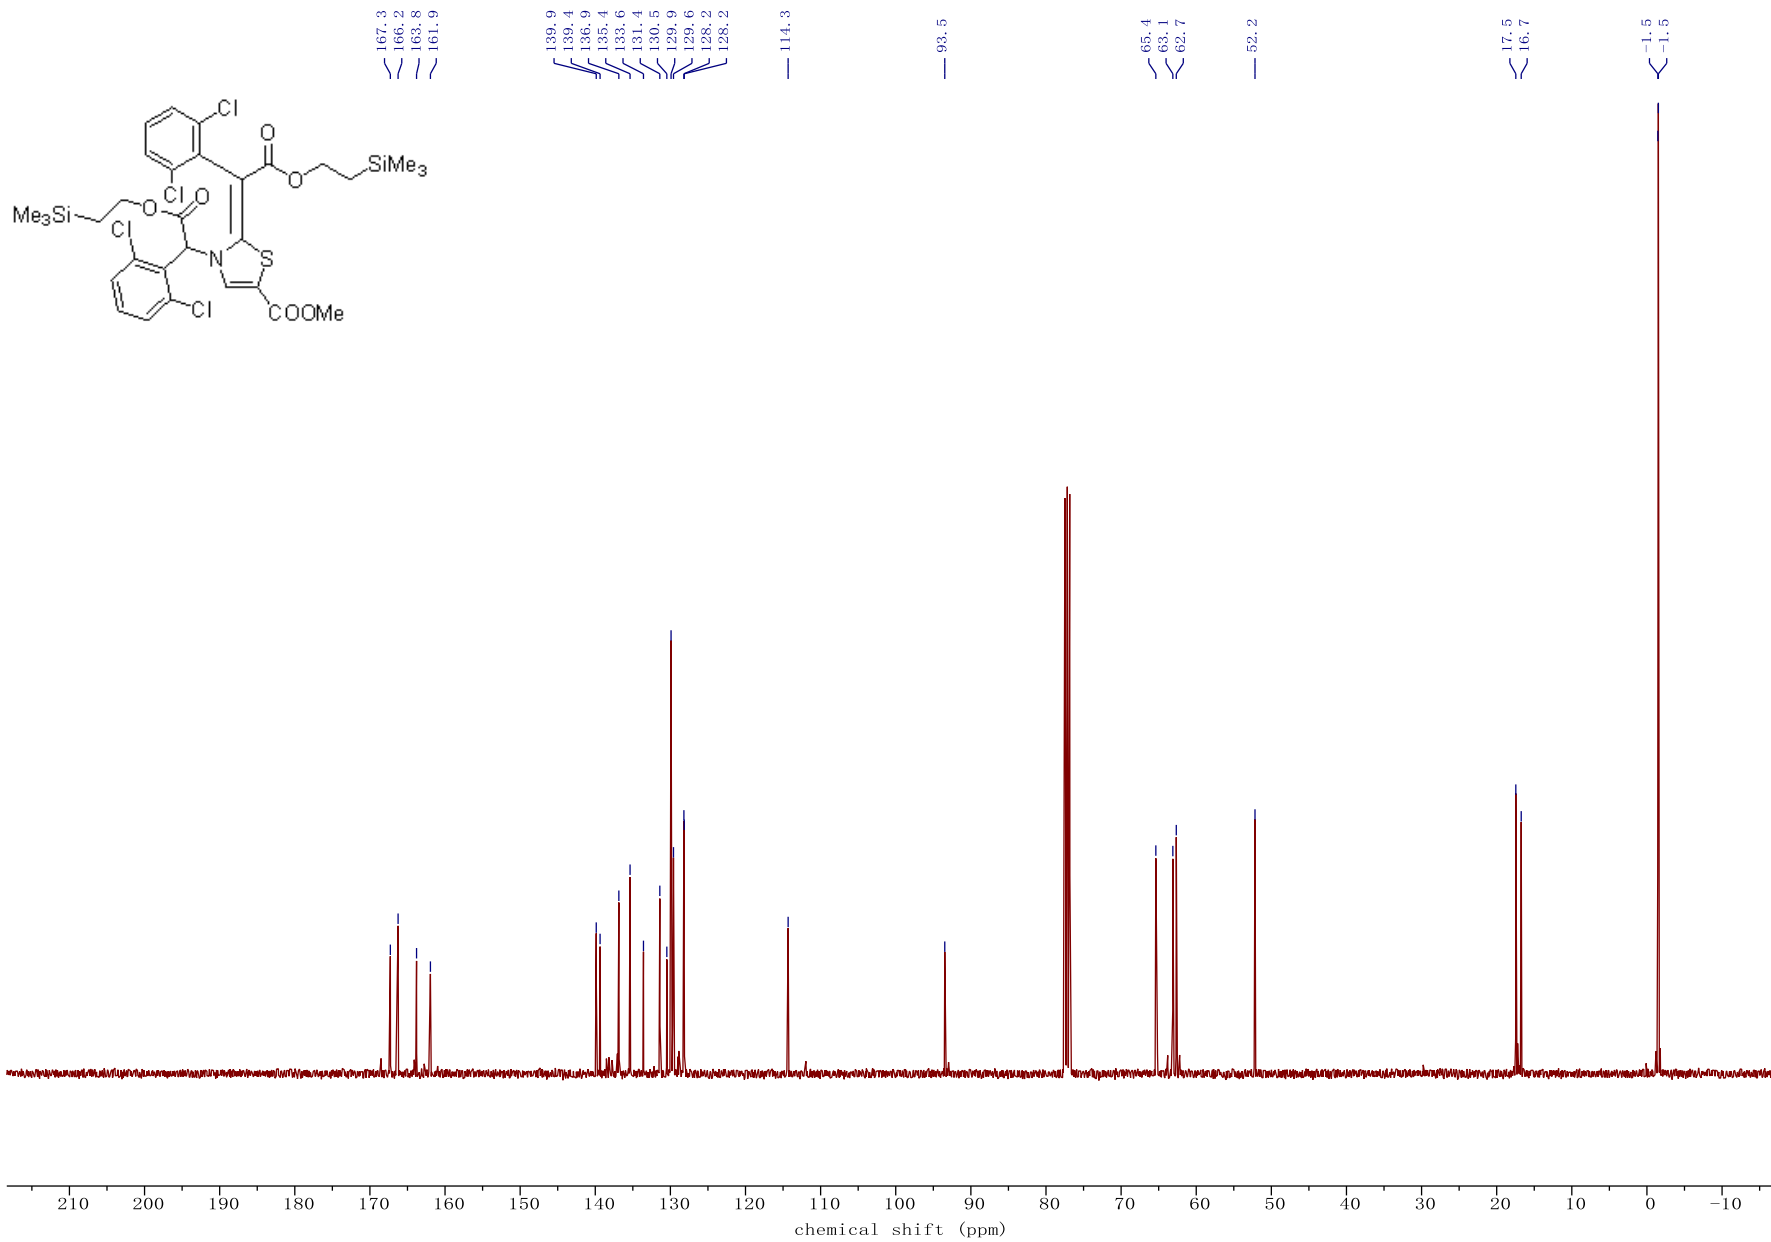

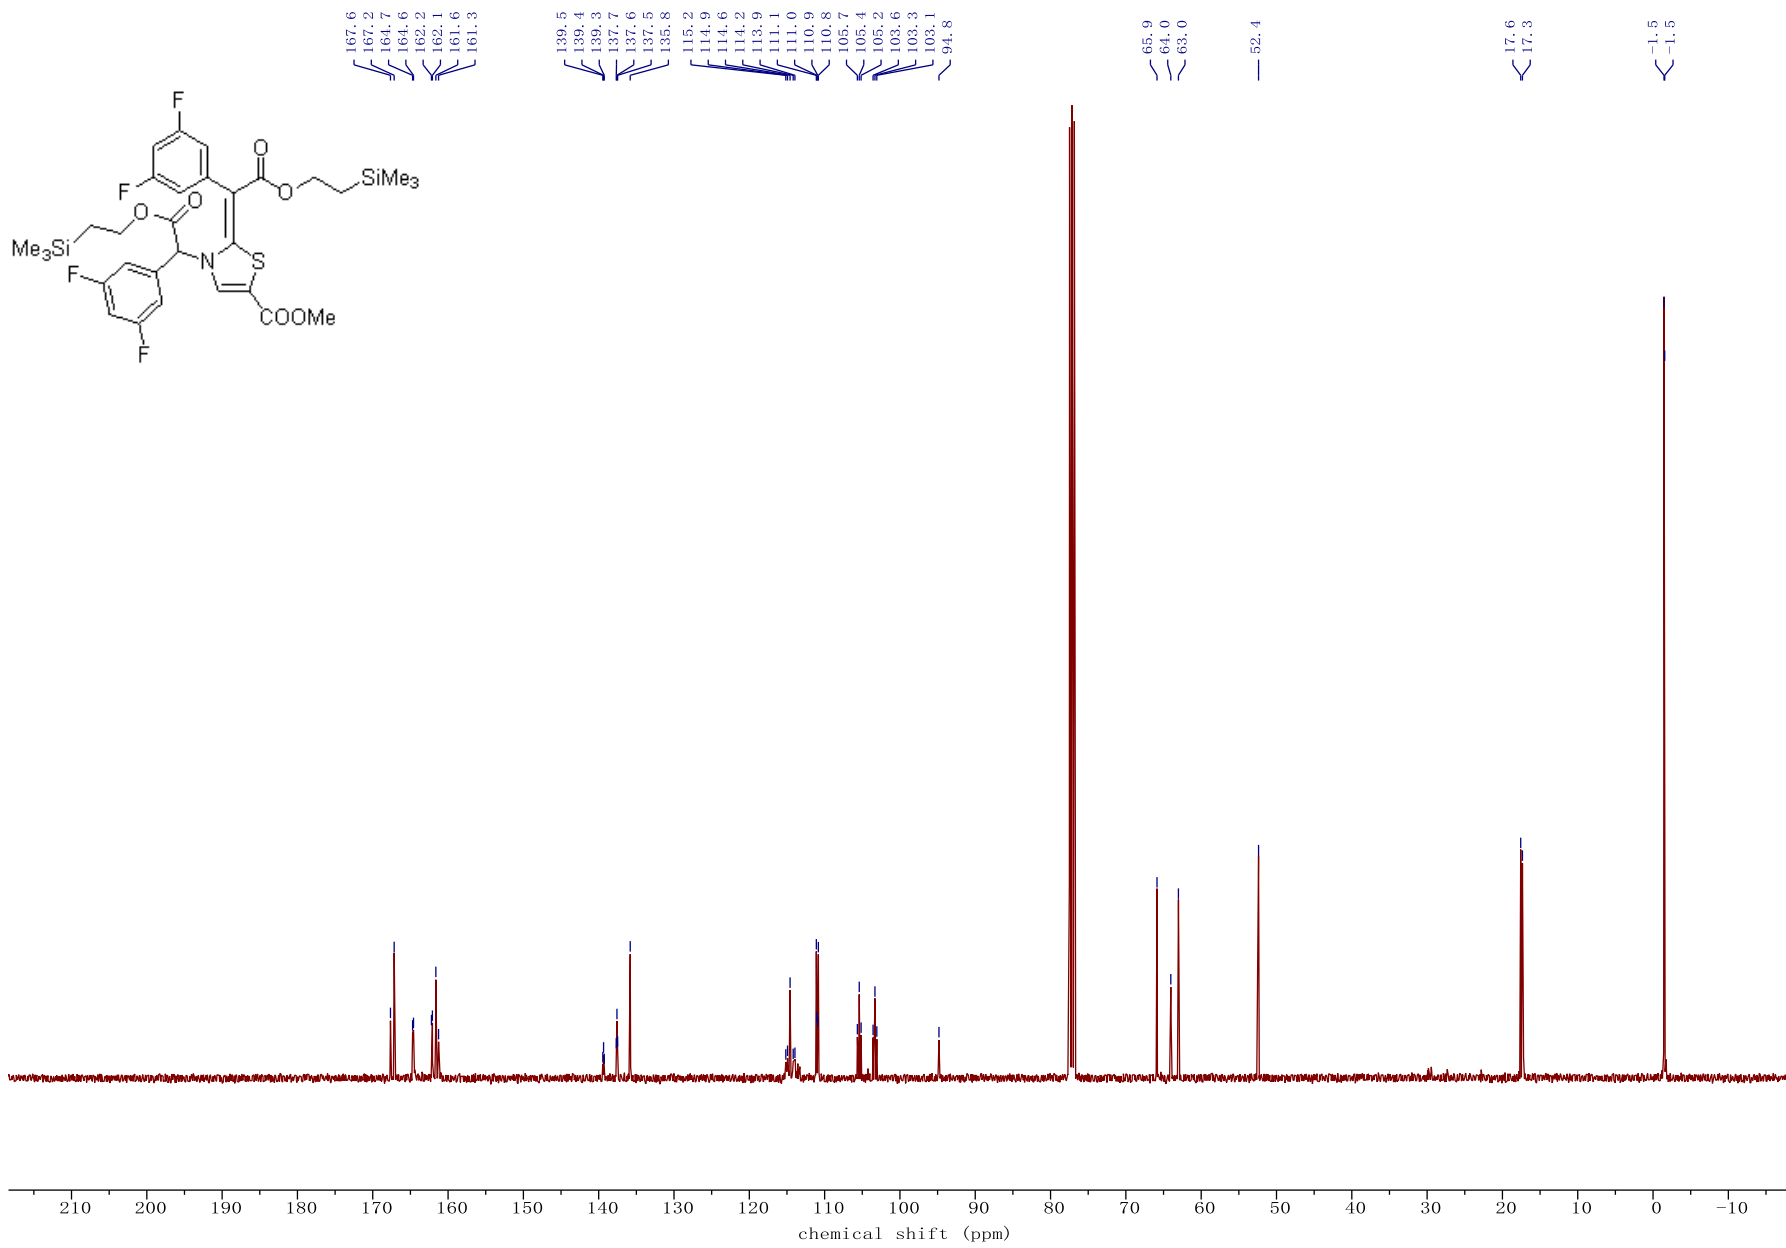



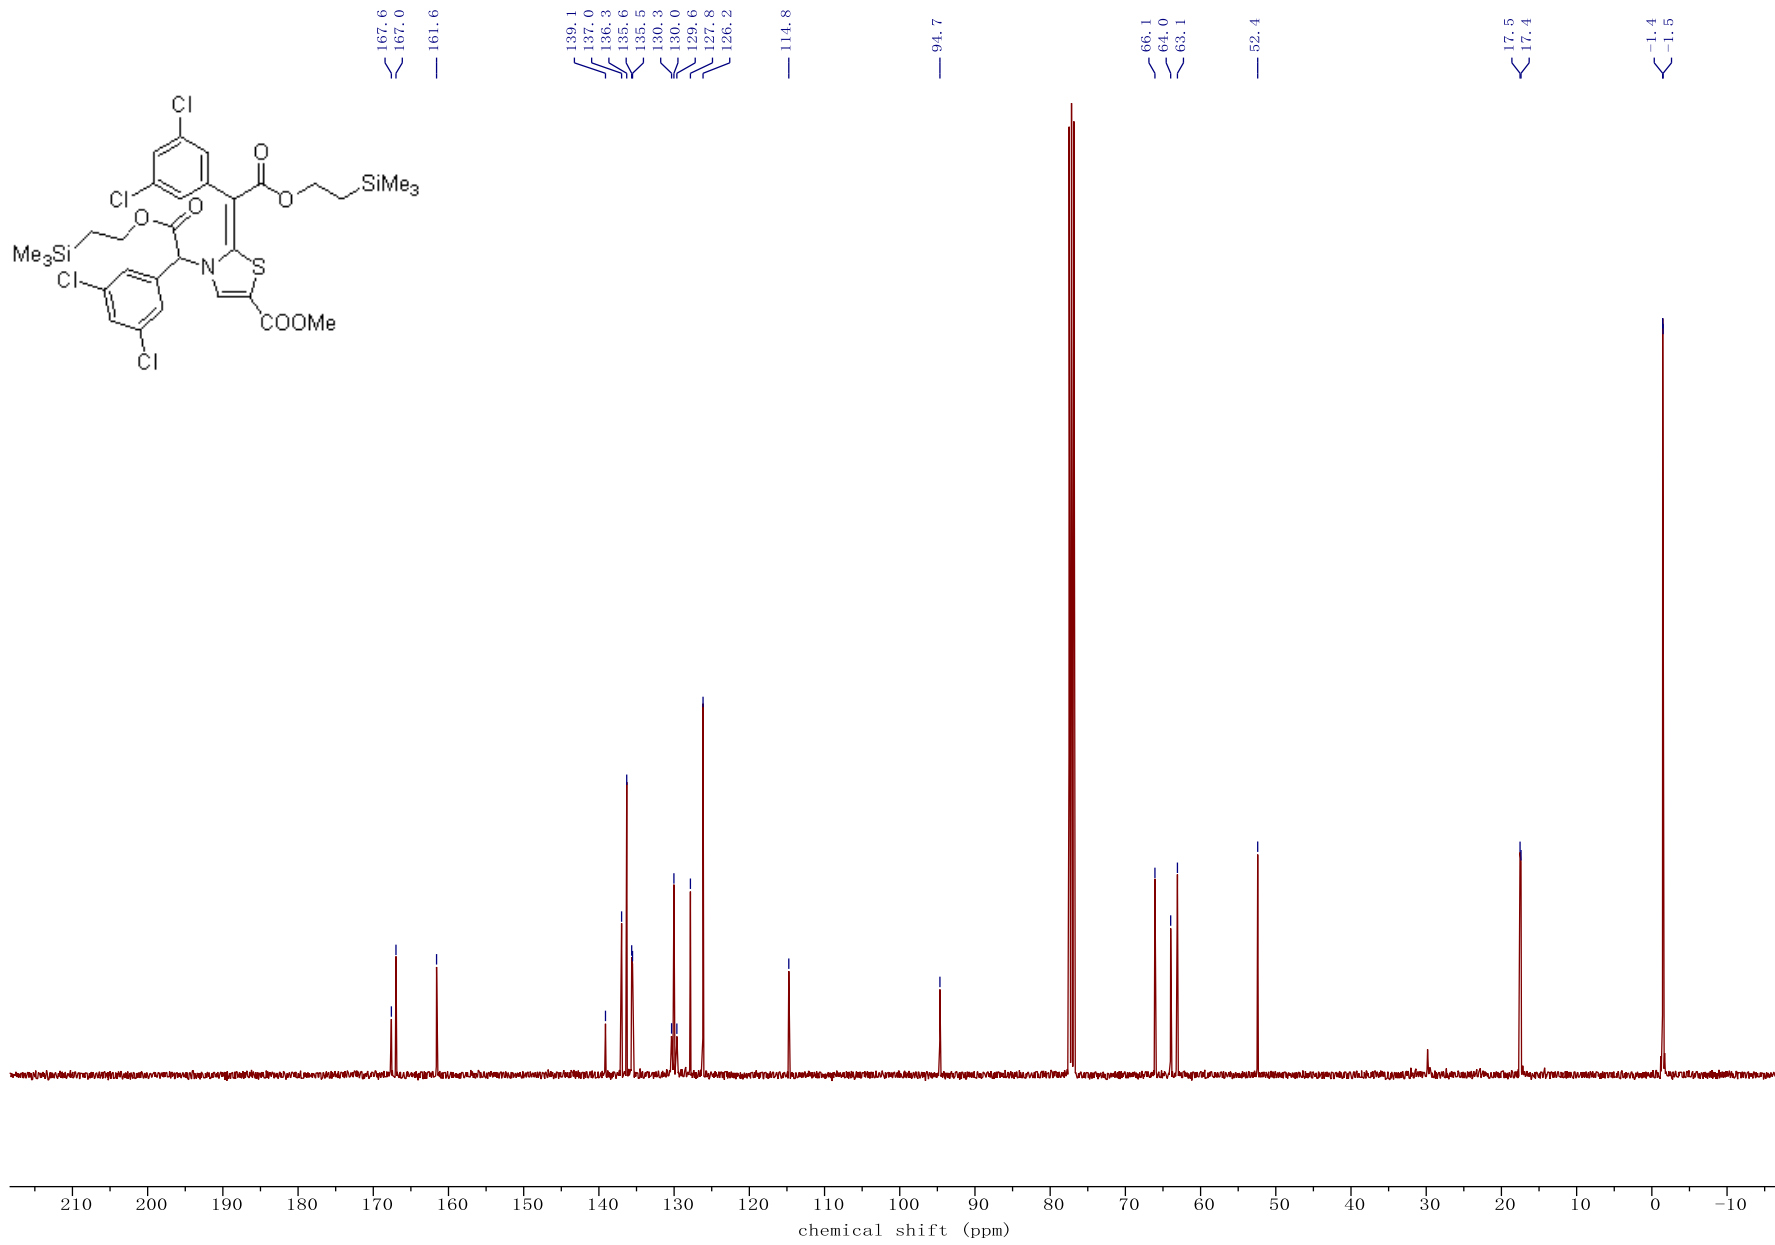

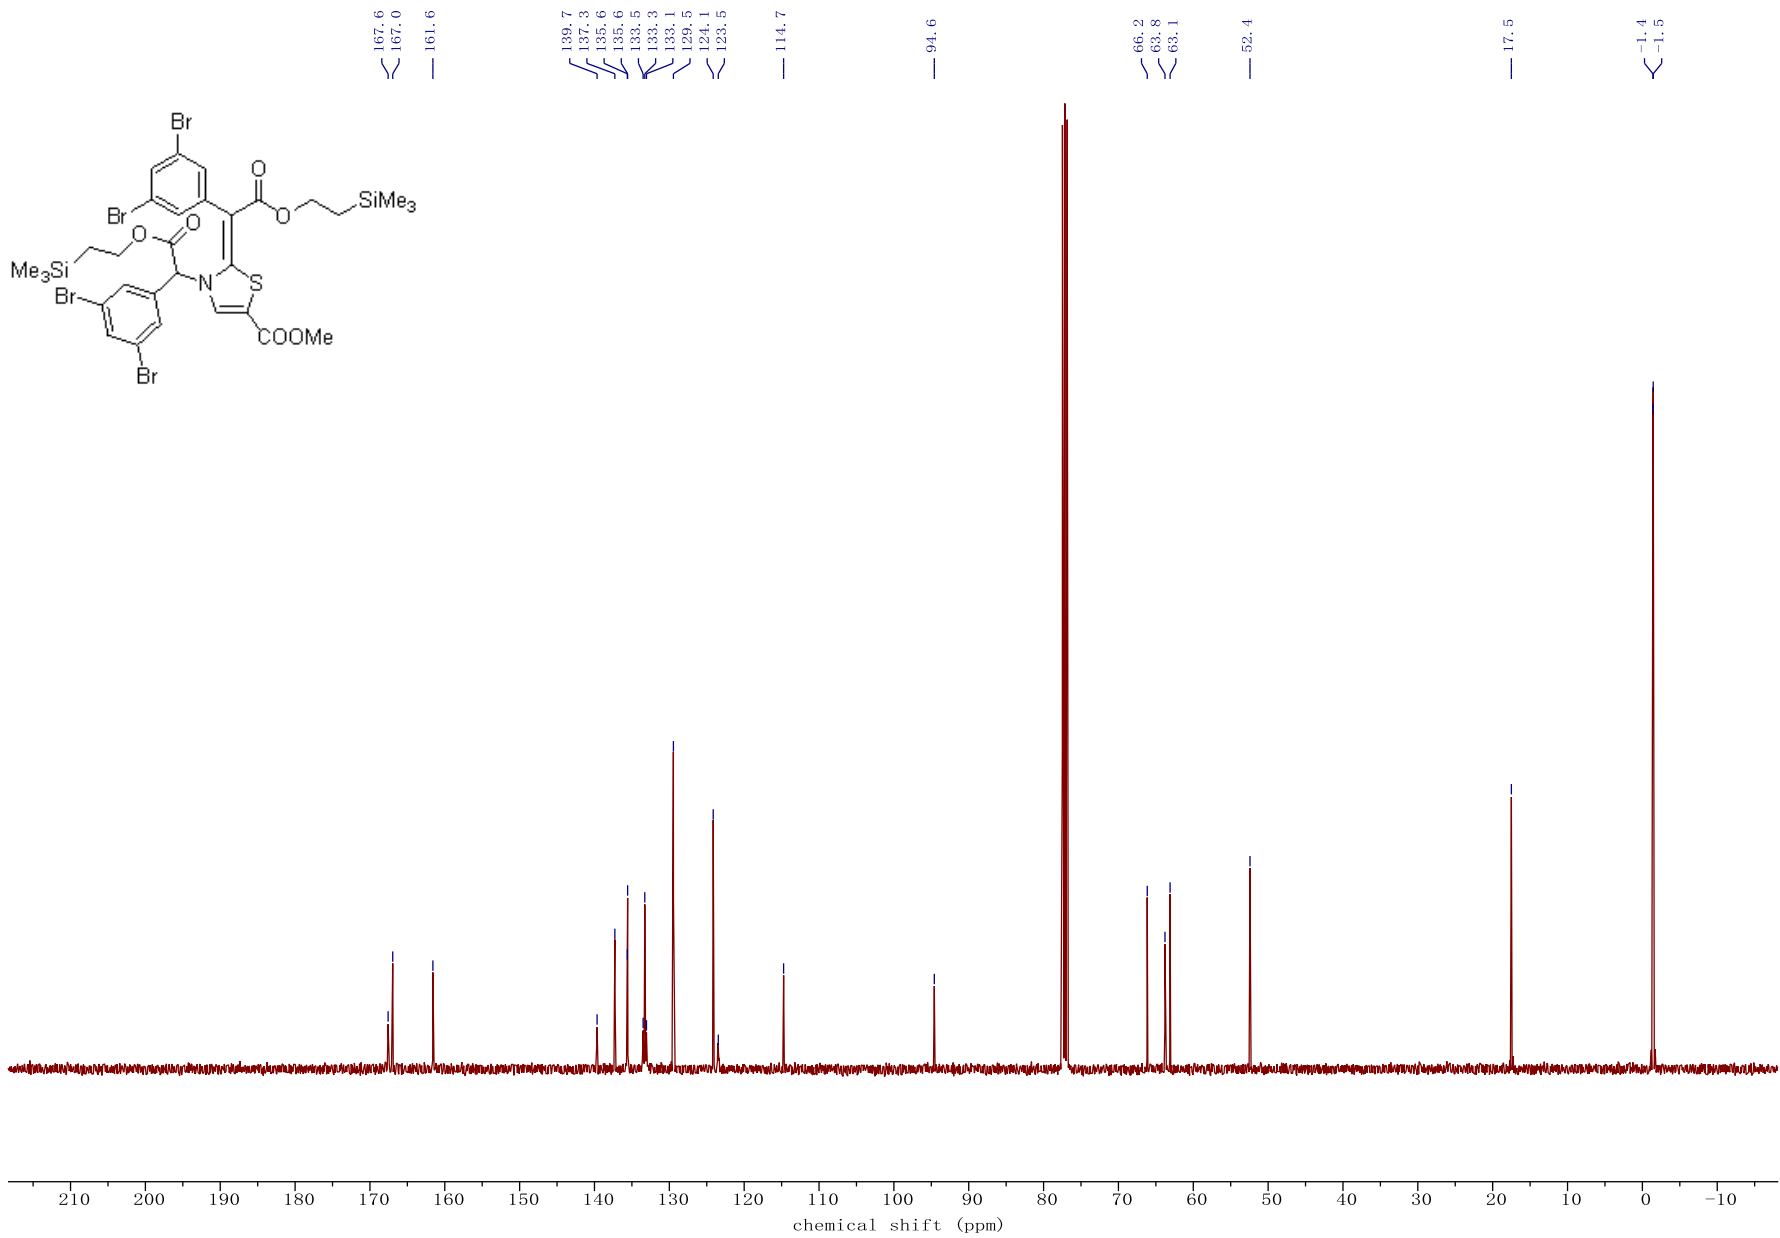

## X-Ray crystallographic data of 3b:

### Experimental

Crystallization of C<sub>30</sub>H<sub>37</sub>Cl<sub>2</sub>NO<sub>4</sub>SSi (**3b**) was successfully carried out using a solution containing ethyl acetate as the solvent, leading to the formation of crystals that were then carefully selected for analysis on an XtaLAB AFC12 (RINC): Kappa single diffractometer. The crystal was kept at 120.0(2) K during data collection. Using Olex2 [1], the structure was solved with the SHELXT [2] structure solution program using Intrinsic Phasing and refined with the SHELXL [3] refinement package using Least Squares minimisation.

1. Dolomanov, O.V., Bourhis, L.J., Gildea, R.J, Howard, J.A.K. & Puschmann, H. (2009), *J. Appl. Cryst.* 42, 339-341.
2. Sheldrick, G.M. (2015). *Acta Cryst.* A71, 3-8.
3. Sheldrick, G.M. (2015). *Acta Cryst.* C71, 3-8.

Number of restraints - 0, number of constraints - unknown.

Details:

#### 1. Fixed Uiso

At 1.2 times of:

All C(H) groups

At 1.5 times of:

All C(H, H, H) groups

#### 2.a Ternary CH refined with riding coordinates:

C19(H19)

#### 2.b Aromatic/amide H refined with riding coordinates:

C2(H2), C6(H6), C7(H7), C9(H9), C10(H10), C21(H21), C22(H22), C24(H24),

C25(H25)

#### 2.c Idealised Me refined as rotating group:

C12(H12A, H12B, H12C), C14(H14A, H14B, H14C), C15(H15A, H15B, H15C),  
C16(H16A, H16B,

H16C), C17(H17A, H17B, H17C), C18(H18A, H18B, H18C), C27(H27A, H27B,  
H27C), C29(H29A,

H29B, H29C), C30(H30A, H30B, H30C)

This report has been created with Olex2, compiled on 2022.04.07 svn.rca3783a0 for OlexSys.

### Table 1 Crystal data and structure refinement for 3b.

|                     |                                                                     |
|---------------------|---------------------------------------------------------------------|
| Identification code | 3b                                                                  |
| Empirical formula   | C <sub>30</sub> H <sub>37</sub> Cl <sub>2</sub> NO <sub>4</sub> SSi |
| Formula weight      | 606.65                                                              |
| Temperature/K       | 120.0(2)                                                            |

|                                               |                                                               |
|-----------------------------------------------|---------------------------------------------------------------|
| Crystal system                                | triclinic                                                     |
| Space group                                   | P-1                                                           |
| $a/\text{\AA}$                                | 11.6650(6)                                                    |
| $b/\text{\AA}$                                | 11.8161(8)                                                    |
| $c/\text{\AA}$                                | 14.0653(9)                                                    |
| $\alpha/^\circ$                               | 70.874(6)                                                     |
| $\beta/^\circ$                                | 66.157(6)                                                     |
| $\gamma/^\circ$                               | 67.903(6)                                                     |
| Volume/ $\text{\AA}^3$                        | 1607.3(2)                                                     |
| Z                                             | 2                                                             |
| $\rho_{\text{calc}}/\text{g/cm}^3$            | 1.253                                                         |
| $\mu/\text{mm}^{-1}$                          | 3.052                                                         |
| F(000)                                        | 640.0                                                         |
| Crystal size/ $\text{mm}^3$                   | $0.14 \times 0.1 \times 0.08$                                 |
| Radiation                                     | Cu K $\alpha$ ( $\lambda = 1.54184$ )                         |
| $2\Theta$ range for data collection/ $^\circ$ | 7.024 to 133.2                                                |
| Index ranges                                  | $-13 \leq h \leq 13, -14 \leq k \leq 12, -16 \leq l \leq 16$  |
| Reflections collected                         | 13065                                                         |
| Independent reflections                       | 5521 [ $R_{\text{int}} = 0.0398, R_{\text{sigma}} = 0.0420$ ] |
| Data/restraints/parameters                    | 5521/0/361                                                    |
| Goodness-of-fit on $F^2$                      | 1.080                                                         |
| Final R indexes [ $I \geq 2\sigma(I)$ ]       | $R_1 = 0.0529, wR_2 = 0.1524$                                 |
| Final R indexes [all data]                    | $R_1 = 0.0580, wR_2 = 0.1573$                                 |
| Largest diff. peak/hole / $e \text{\AA}^{-3}$ | 0.68/-0.44                                                    |

### Crystal structure determination of 3b

**Crystal Data** for  $\text{C}_{30}\text{H}_{37}\text{Cl}_2\text{NO}_4\text{SSi}$  ( $M = 606.65$  g/mol): triclinic, space group P-1 (no. 2),  $a = 11.6650(6)$   $\text{\AA}$ ,  $b = 11.8161(8)$   $\text{\AA}$ ,  $c = 14.0653(9)$   $\text{\AA}$ ,  $\alpha = 70.874(6)^\circ$ ,  $\beta = 66.157(6)^\circ$ ,  $\gamma = 67.903(6)^\circ$ ,  $V = 1607.3(2)$   $\text{\AA}^3$ ,  $Z = 2$ ,  $T = 120.0(2)$  K,  $\mu(\text{Cu K}\alpha) = 3.052$   $\text{mm}^{-1}$ ,  $D_{\text{calc}} = 1.253$   $\text{g/cm}^3$ , 13065 reflections measured ( $7.024^\circ \leq 2\Theta \leq 133.2^\circ$ ), 5521 unique ( $R_{\text{int}} = 0.0398, R_{\text{sigma}} = 0.0420$ ) which were used in all calculations. The final  $R_1$  was 0.0529 ( $I > 2\sigma(I)$ ) and  $wR_2$  was 0.1573 (all data).

### Refinement model description

**Table 2 Fractional Atomic Coordinates ( $\times 10^4$ ) and Equivalent Isotropic Displacement Parameters ( $\text{\AA}^2 \times 10^3$ ) for 3b.  $U_{\text{eq}}$  is defined as 1/3 of the trace of the orthogonalised  $U_{\text{ij}}$  tensor.**

| Atom | $x$        | $y$         | $z$         | $U(\text{eq})$ |
|------|------------|-------------|-------------|----------------|
| C11  | 8440.1(6)  | 5147.5(6)   | 11094.6(5)  | 46.91(19)      |
| C12  | 9217.5(8)  | 4786.5(7)   | 3250.6(6)   | 62.9(2)        |
| S1   | 5097.5(5)  | 10179.2(5)  | 7216.4(4)   | 35.63(18)      |
| Si1  | 2694.2(6)  | 10021.6(6)  | 9359.0(5)   | 36.51(19)      |
| O1   | 6883.7(16) | 10999.2(15) | 5525.4(13)  | 42.6(4)        |
| O2   | 8234.3(14) | 10021.1(14) | 4161.0(11)  | 34.5(4)        |
| O3   | 4702.2(14) | 5907.9(15)  | 7553.8(14)  | 41.5(4)        |
| O4   | 6750.7(14) | 4627.3(14)  | 7054.5(12)  | 34.2(4)        |
| N1   | 5677.3(16) | 7835.5(17)  | 7315.0(14)  | 31.1(4)        |
| C1   | 4150(2)    | 9304(2)     | 8302.0(18)  | 36.0(5)        |
| C2   | 4602(2)    | 8115(2)     | 8216.4(17)  | 33.7(5)        |
| C3   | 6060.6(19) | 8870(2)     | 6637.0(16)  | 30.1(4)        |
| C4   | 7006(2)    | 8910(2)     | 5651.6(16)  | 30.9(5)        |
| C5   | 7558(2)    | 7888(2)     | 5057.5(15)  | 29.6(4)        |
| C6   | 8886(2)    | 7294(2)     | 4737.8(17)  | 33.5(5)        |
| C7   | 9406(2)    | 6350(2)     | 4171.0(18)  | 37.7(5)        |
| C8   | 8567(2)    | 6000(2)     | 3933.3(17)  | 39.1(5)        |
| C9   | 7243(2)    | 6577(2)     | 4224.3(18)  | 40.2(5)        |
| C10  | 6738(2)    | 7526(2)     | 4785.9(17)  | 34.8(5)        |
| C11  | 7345(2)    | 10080(2)    | 5133.4(17)  | 32.4(5)        |
| C12  | 9544(3)    | 10635(3)    | 2444(2)     | 51.3(7)        |
| C13  | 8674(2)    | 11115(2)    | 3461.0(17)  | 34.9(5)        |
| C14  | 7533(3)    | 12206(3)    | 3271(2)     | 54.8(7)        |
| C15  | 9481(3)    | 11414(3)    | 3910(2)     | 49.0(6)        |
| C16  | 1746(2)    | 11511(2)    | 8699(2)     | 49.6(6)        |
| C17  | 3225(2)    | 10344(3)    | 10307(2)    | 48.8(6)        |
| C18  | 1741(2)    | 8859(2)     | 10075.3(19) | 43.5(6)        |
| C19  | 6547(2)    | 6539(2)     | 7346.2(16)  | 30.3(4)        |
| C20  | 7025.5(19) | 6127(2)     | 8301.4(16)  | 30.4(4)        |
| C21  | 6773(2)    | 5130(2)     | 9121.1(18)  | 41.5(5)        |
| C22  | 7222(3)    | 4805(3)     | 9984.2(19)  | 45.5(6)        |
| C23  | 7918(2)    | 5503(2)     | 10006.8(17) | 36.3(5)        |
| C24  | 8178(2)    | 6504(2)     | 9200(2)     | 41.7(5)        |
| C25  | 7733(2)    | 6807(2)     | 8350.3(19)  | 39.7(5)        |
| C26  | 5863(2)    | 5669(2)     | 7329.7(16)  | 31.9(5)        |
| C27  | 7626(2)    | 2590(3)     | 6752(3)     | 57.9(8)        |

**Table 2 Fractional Atomic Coordinates ( $\times 10^4$ ) and Equivalent Isotropic Displacement Parameters ( $\text{\AA}^2 \times 10^3$ ) for 3b.  $U_{eq}$  is defined as 1/3 of the trace of the orthogonalised  $U_{ij}$  tensor.**

| Atom | $x$     | $y$     | $z$        | $U_{eq}$ |
|------|---------|---------|------------|----------|
| C28  | 6349(2) | 3583(2) | 7009.7(18) | 35.7(5)  |
| C29  | 5736(3) | 4018(3) | 6139(2)    | 54.0(7)  |
| C30  | 5435(3) | 3136(3) | 8083(2)    | 51.8(6)  |

**Table 3 Anisotropic Displacement Parameters ( $\text{\AA}^2 \times 10^3$ ) for 3b. The anisotropic displacement factor exponent takes the form:  $-2\pi^2[h^2a^2U_{11}+2hka*b*U_{12}+\dots]$ .**

| Atom | $U_{11}$ | $U_{22}$ | $U_{33}$ | $U_{23}$  | $U_{13}$  | $U_{12}$  |
|------|----------|----------|----------|-----------|-----------|-----------|
| C11  | 50.7(4)  | 57.1(4)  | 41.1(3)  | -12.7(3)  | -16.9(2)  | -19.4(3)  |
| C12  | 89.3(5)  | 48.8(4)  | 64.0(4)  | -35.4(3)  | -34.9(4)  | -2.1(4)   |
| S1   | 36.7(3)  | 29.0(3)  | 36.1(3)  | -13.7(2)  | 0.3(2)    | -10.8(2)  |
| Si1  | 30.9(3)  | 35.0(4)  | 39.9(3)  | -16.1(3)  | -0.8(2)   | -9.6(3)   |
| O1   | 50.0(9)  | 31.9(9)  | 40.9(8)  | -15.8(7)  | 1.6(7)    | -17.0(7)  |
| O2   | 39.7(8)  | 30.7(8)  | 31.5(7)  | -10.9(6)  | -1.6(6)   | -15.1(7)  |
| O3   | 31.3(8)  | 35.0(9)  | 60.3(10) | -16.0(8)  | -12.5(7)  | -8.9(7)   |
| O4   | 32.4(8)  | 33.4(9)  | 43.3(8)  | -19.4(7)  | -8.7(6)   | -10.2(6)  |
| N1   | 29.3(9)  | 28.9(10) | 33.4(9)  | -12.1(7)  | -3.1(7)   | -9.3(7)   |
| C1   | 31.0(10) | 35.9(13) | 37.5(11) | -12.0(9)  | -3.0(9)   | -10.5(9)  |
| C2   | 29.5(10) | 34.0(12) | 35.7(11) | -14.0(9)  | -0.9(8)   | -11.4(9)  |
| C3   | 29.9(10) | 31.0(11) | 31.8(10) | -11.7(8)  | -7.0(8)   | -9.9(9)   |
| C4   | 30.7(10) | 29.2(11) | 32.3(10) | -10.6(9)  | -5.9(8)   | -8.8(9)   |
| C5   | 35.6(11) | 28.5(11) | 26.9(9)  | -8.1(8)   | -6.1(8)   | -13.7(9)  |
| C6   | 33.8(11) | 33.4(12) | 36.5(11) | -13.8(9)  | -7.6(9)   | -11.4(9)  |
| C7   | 38.9(12) | 33.3(12) | 38.3(11) | -15.3(10) | -6.9(9)   | -6.8(10)  |
| C8   | 55.7(14) | 30.5(12) | 33.0(11) | -12.7(9)  | -14.3(10) | -8.9(10)  |
| C9   | 53.0(14) | 40.2(13) | 40.1(12) | -9.7(10)  | -20.5(10) | -19.2(11) |
| C10  | 35.6(11) | 36.8(12) | 35.6(11) | -9.7(9)   | -10.8(9)  | -12.7(9)  |
| C11  | 33.2(10) | 31.1(12) | 31.8(10) | -11.1(9)  | -5.5(8)   | -9.4(9)   |
| C12  | 64.9(16) | 48.6(16) | 34.2(12) | -11.8(11) | 3.0(11)   | -27.2(13) |
| C13  | 39.0(11) | 30.2(12) | 33.0(10) | -7.1(9)   | -4.7(9)   | -14.1(9)  |
| C14  | 48.9(15) | 45.3(15) | 52.8(15) | 3.5(12)   | -12.2(12) | -11.0(12) |
| C15  | 53.3(15) | 53.0(16) | 48.5(13) | -11.8(12) | -8.9(11)  | -30.1(13) |
| C16  | 40.2(13) | 40.0(14) | 59.5(15) | -14.2(12) | -9.5(11)  | -5.3(11)  |
| C17  | 41.7(13) | 52.4(16) | 54.0(14) | -27.6(12) | -3.7(11)  | -13.7(12) |
| C18  | 38.3(12) | 47.5(15) | 41.3(12) | -14.6(11) | -1.9(10)  | -15.9(11) |
| C19  | 28.5(10) | 28.0(11) | 32.6(10) | -11.5(8)  | -3.5(8)   | -8.5(8)   |

**Table 3 Anisotropic Displacement Parameters ( $\text{\AA}^2 \times 10^3$ ) for 3b. The Anisotropic displacement factor exponent takes the form:  $-2\pi^2[h^2a^{*2}U_{11}+2hka^*b^*U_{12}+\dots]$ .**

| Atom | $U_{11}$ | $U_{22}$ | $U_{33}$ | $U_{23}$  | $U_{13}$  | $U_{12}$  |
|------|----------|----------|----------|-----------|-----------|-----------|
| C20  | 27.2(10) | 31.1(11) | 33.0(10) | -15.9(9)  | -2.5(8)   | -8.0(8)   |
| C21  | 50.9(13) | 45.9(14) | 37.2(11) | -7.4(10)  | -11.6(10) | -27.6(11) |
| C22  | 57.1(15) | 50.0(15) | 35.5(12) | -4.0(11)  | -10.7(10) | -30.5(12) |
| C23  | 35.5(11) | 40.8(13) | 35.9(11) | -16.7(9)  | -7.9(9)   | -10.7(10) |
| C24  | 44.1(12) | 39.1(13) | 52.0(13) | -10.4(11) | -18.6(11) | -18.1(11) |
| C25  | 40.4(12) | 35.2(12) | 46.0(12) | -5.9(10)  | -14.2(10) | -15.3(10) |
| C26  | 35.2(11) | 27.9(11) | 32.2(10) | -9.5(8)   | -8.1(8)   | -8.9(9)   |
| C27  | 41.9(14) | 49.0(16) | 97(2)    | -46.8(16) | -19.5(14) | -4.5(12)  |
| C28  | 37.2(11) | 33.3(12) | 44.8(12) | -17.3(10) | -11.8(9)  | -12.3(9)  |
| C29  | 73.8(18) | 48.4(16) | 61.0(16) | -12.6(13) | -33.7(14) | -25.7(14) |
| C30  | 62.6(16) | 39.2(14) | 52.8(15) | -11.2(12) | -8.5(13)  | -22.9(13) |

**Table 4 Bond Lengths for 3b.**

| Atom | Atom | Length/ $\text{\AA}$ | Atom | Atom | Length/ $\text{\AA}$ |
|------|------|----------------------|------|------|----------------------|
| C11  | C23  | 1.740(2)             | C5   | C6   | 1.386(3)             |
| C12  | C8   | 1.746(2)             | C5   | C10  | 1.398(3)             |
| S1   | C1   | 1.756(2)             | C6   | C7   | 1.390(3)             |
| S1   | C3   | 1.760(2)             | C7   | C8   | 1.379(3)             |
| Si1  | C1   | 1.874(2)             | C8   | C9   | 1.377(4)             |
| Si1  | C16  | 1.864(3)             | C9   | C10  | 1.391(3)             |
| Si1  | C17  | 1.867(3)             | C12  | C13  | 1.524(3)             |
| Si1  | C18  | 1.864(2)             | C13  | C14  | 1.509(3)             |
| O1   | C11  | 1.219(3)             | C13  | C15  | 1.512(3)             |
| O2   | C11  | 1.346(3)             | C19  | C20  | 1.525(3)             |
| O2   | C13  | 1.470(2)             | C19  | C26  | 1.530(3)             |
| O3   | C26  | 1.199(3)             | C20  | C21  | 1.378(3)             |
| O4   | C26  | 1.329(3)             | C20  | C25  | 1.383(3)             |
| O4   | C28  | 1.502(3)             | C21  | C22  | 1.397(3)             |
| N1   | C2   | 1.402(3)             | C22  | C23  | 1.372(3)             |
| N1   | C3   | 1.381(3)             | C23  | C24  | 1.375(3)             |
| N1   | C19  | 1.483(3)             | C24  | C25  | 1.381(3)             |
| C1   | C2   | 1.331(3)             | C27  | C28  | 1.502(3)             |
| C3   | C4   | 1.378(3)             | C28  | C29  | 1.514(3)             |
| C4   | C5   | 1.488(3)             | C28  | C30  | 1.515(3)             |
| C4   | C11  | 1.455(3)             |      |      |                      |

**Table 5 Bond Angles for 3b.**

| Atom Atom Atom Angle/° |     |     |            | Atom Atom Atom Angle/° |     |     |            |
|------------------------|-----|-----|------------|------------------------|-----|-----|------------|
| C1                     | S1  | C3  | 92.25(10)  | O1                     | C11 | O2  | 124.15(19) |
| C16                    | Si1 | C1  | 108.08(11) | O1                     | C11 | C4  | 124.54(19) |
| C16                    | Si1 | C17 | 109.74(13) | O2                     | C11 | C4  | 111.31(18) |
| C17                    | Si1 | C1  | 110.42(11) | O2                     | C13 | C12 | 101.77(18) |
| C18                    | Si1 | C1  | 106.54(11) | O2                     | C13 | C14 | 110.97(18) |
| C18                    | Si1 | C16 | 112.37(12) | O2                     | C13 | C15 | 109.83(19) |
| C18                    | Si1 | C17 | 109.64(12) | C14                    | C13 | C12 | 110.8(2)   |
| C11                    | O2  | C13 | 121.23(17) | C14                    | C13 | C15 | 113.0(2)   |
| C26                    | O4  | C28 | 120.83(16) | C15                    | C13 | C12 | 109.9(2)   |
| C2                     | N1  | C19 | 118.97(17) | N1                     | C19 | C20 | 109.19(17) |
| C3                     | N1  | C2  | 113.46(18) | N1                     | C19 | C26 | 110.74(17) |
| C3                     | N1  | C19 | 123.77(16) | C20                    | C19 | C26 | 113.55(17) |
| S1                     | C1  | Si1 | 122.89(13) | C21                    | C20 | C19 | 123.60(19) |
| C2                     | C1  | S1  | 109.56(16) | C21                    | C20 | C25 | 118.6(2)   |
| C2                     | C1  | Si1 | 127.50(17) | C25                    | C20 | C19 | 117.83(19) |
| C1                     | C2  | N1  | 115.88(19) | C20                    | C21 | C22 | 121.1(2)   |
| N1                     | C3  | S1  | 108.68(14) | C23                    | C22 | C21 | 118.7(2)   |
| C4                     | C3  | S1  | 124.39(17) | C22                    | C23 | Cl1 | 119.52(19) |
| C4                     | C3  | N1  | 126.9(2)   | C22                    | C23 | C24 | 121.2(2)   |
| C3                     | C4  | C5  | 123.22(18) | C24                    | C23 | Cl1 | 119.23(17) |
| C3                     | C4  | C11 | 116.88(19) | C23                    | C24 | C25 | 119.3(2)   |
| C11                    | C4  | C5  | 119.47(18) | C24                    | C25 | C20 | 121.1(2)   |
| C6                     | C5  | C4  | 121.47(18) | O3                     | C26 | O4  | 126.7(2)   |
| C6                     | C5  | C10 | 118.4(2)   | O3                     | C26 | C19 | 124.0(2)   |
| C10                    | C5  | C4  | 120.1(2)   | O4                     | C26 | C19 | 109.30(17) |
| C5                     | C6  | C7  | 121.6(2)   | O4                     | C28 | C27 | 102.51(17) |
| C8                     | C7  | C6  | 118.5(2)   | O4                     | C28 | C29 | 109.37(19) |
| C7                     | C8  | C12 | 118.42(19) | O4                     | C28 | C30 | 110.20(19) |
| C9                     | C8  | C12 | 119.86(18) | C27                    | C28 | C29 | 111.8(2)   |
| C9                     | C8  | C7  | 121.7(2)   | C27                    | C28 | C30 | 110.4(2)   |
| C8                     | C9  | C10 | 119.1(2)   | C29                    | C28 | C30 | 112.2(2)   |
| C9                     | C10 | C5  | 120.7(2)   |                        |     |     |            |



**Table 6 Torsion Angles for 3b.**

| A   | B   | C   | D   | Angle/°     | A   | B   | C   | D   | Angle/°     |
|-----|-----|-----|-----|-------------|-----|-----|-----|-----|-------------|
| C11 | C23 | C24 | C25 | -178.24(19) | C8  | C9  | C10 | C5  | -0.3(3)     |
| C12 | C8  | C9  | C10 | 178.74(16)  | C10 | C5  | C6  | C7  | -0.7(3)     |
| S1  | C1  | C2  | N1  | -0.6(3)     | C11 | O2  | C13 | C12 | -174.6(2)   |
| S1  | C3  | C4  | C5  | -163.38(16) | C11 | O2  | C13 | C14 | -56.6(3)    |
| S1  | C3  | C4  | C11 | 9.0(3)      | C11 | O2  | C13 | C15 | 69.0(3)     |
| Si1 | C1  | C2  | N1  | 177.03(16)  | C11 | C4  | C5  | C6  | 65.3(3)     |
| N1  | C3  | C4  | C5  | 14.4(3)     | C11 | C4  | C5  | C10 | -113.1(2)   |
| N1  | C3  | C4  | C11 | -173.2(2)   | C13 | O2  | C11 | O1  | -3.3(3)     |
| N1  | C19 | C20 | C21 | 118.8(2)    | C13 | O2  | C11 | C4  | 176.59(18)  |
| N1  | C19 | C20 | C25 | -60.1(2)    | C16 | Si1 | C1  | S1  | 42.07(18)   |
| N1  | C19 | C26 | O3  | -18.9(3)    | C16 | Si1 | C1  | C2  | -135.3(2)   |
| N1  | C19 | C26 | O4  | 162.34(16)  | C17 | Si1 | C1  | S1  | -77.97(18)  |
| C1  | S1  | C3  | N1  | -3.66(16)   | C17 | Si1 | C1  | C2  | 104.7(2)    |
| C1  | S1  | C3  | C4  | 174.48(19)  | C18 | Si1 | C1  | S1  | 163.04(14)  |
| C2  | N1  | C3  | S1  | 4.0(2)      | C18 | Si1 | C1  | C2  | -14.3(3)    |
| C2  | N1  | C3  | C4  | -174.1(2)   | C19 | N1  | C2  | C1  | 156.6(2)    |
| C2  | N1  | C19 | C20 | -54.4(2)    | C19 | N1  | C3  | S1  | -153.72(16) |
| C2  | N1  | C19 | C26 | 71.4(2)     | C19 | N1  | C3  | C4  | 28.2(3)     |
| C3  | S1  | C1  | Si1 | -175.30(15) | C19 | C20 | C21 | C22 | -179.1(2)   |
| C3  | S1  | C1  | C2  | 2.45(18)    | C19 | C20 | C25 | C24 | 178.8(2)    |
| C3  | N1  | C2  | C1  | -2.3(3)     | C20 | C19 | C26 | O3  | 104.3(2)    |
| C3  | N1  | C19 | C20 | 102.2(2)    | C20 | C19 | C26 | O4  | -74.4(2)    |
| C3  | N1  | C19 | C26 | -132.0(2)   | C20 | C21 | C22 | C23 | 0.3(4)      |
| C3  | C4  | C5  | C6  | -122.5(2)   | C21 | C20 | C25 | C24 | -0.1(4)     |
| C3  | C4  | C5  | C10 | 59.1(3)     | C21 | C22 | C23 | C11 | 177.9(2)    |
| C3  | C4  | C11 | O1  | 2.5(3)      | C21 | C22 | C23 | C24 | -0.2(4)     |
| C3  | C4  | C11 | O2  | -177.34(18) | C22 | C23 | C24 | C25 | -0.2(4)     |
| C4  | C5  | C6  | C7  | -179.16(19) | C23 | C24 | C25 | C20 | 0.3(4)      |
| C4  | C5  | C10 | C9  | 179.54(19)  | C25 | C20 | C21 | C22 | -0.2(4)     |
| C5  | C4  | C11 | O1  | 175.2(2)    | C26 | O4  | C28 | C27 | -176.0(2)   |
| C5  | C4  | C11 | O2  | -4.6(3)     | C26 | O4  | C28 | C29 | 65.3(3)     |
| C5  | C6  | C7  | C8  | -0.4(3)     | C26 | O4  | C28 | C30 | -58.4(3)    |
| C6  | C5  | C10 | C9  | 1.1(3)      | C26 | C19 | C20 | C21 | -5.3(3)     |
| C6  | C7  | C8  | C12 | -178.39(17) | C26 | C19 | C20 | C25 | 175.80(19)  |
| C6  | C7  | C8  | C9  | 1.3(3)      | C28 | O4  | C26 | O3  | -0.8(3)     |
| C7  | C8  | C9  | C10 | -1.0(4)     | C28 | O4  | C26 | C19 | 177.92(17)  |

**Table 7 Hydrogen Atom Coordinates ( $\text{\AA}\times 10^4$ ) and Isotropic Displacement Parameters ( $\text{\AA}^2\times 10^3$ ) for 3b.**

| Atom | x        | y        | z        | U(eq) |
|------|----------|----------|----------|-------|
| H2   | 4219.73  | 7492.47  | 8733.99  | 40    |
| H6   | 9455.2   | 7538.58  | 4910.23  | 40    |
| H7   | 10319.22 | 5954.58  | 3952.13  | 45    |
| H9   | 6682.55  | 6331.1   | 4043.72  | 48    |
| H10  | 5826.66  | 7931.4   | 4987.13  | 42    |
| H12A | 10273.22 | 9923.49  | 2586.6   | 77    |
| H12B | 9884.99  | 11302.34 | 1899.17  | 77    |
| H12C | 9032.9   | 10371.71 | 2192.31  | 77    |
| H14A | 6979.01  | 11929.92 | 3075.87  | 82    |
| H14B | 7857.03  | 12860.4  | 2692.89  | 82    |
| H14C | 7022.48  | 12537.39 | 3919.77  | 82    |
| H15A | 8925.22  | 11681.16 | 4582.83  | 74    |
| H15B | 9848.39  | 12086.63 | 3404.47  | 74    |
| H15C | 10191.6  | 10669.07 | 4034.68  | 74    |
| H16A | 2283.02  | 12092.66 | 8337.34  | 74    |
| H16B | 954.66   | 11880.2  | 9234.74  | 74    |
| H16C | 1503.53  | 11342.39 | 8179.33  | 74    |
| H17A | 3821.12  | 9580.17  | 10578.8  | 73    |
| H17B | 2458.91  | 10624.2  | 10900.21 | 73    |
| H17C | 3674.74  | 10996.41 | 9939.64  | 73    |
| H18A | 1499.23  | 8661.52  | 9569.65  | 65    |
| H18B | 948.77   | 9207.8   | 10620.85 | 65    |
| H18C | 2274.68  | 8096.06  | 10411.92 | 65    |
| H19  | 7326.88  | 6545.05  | 6690.58  | 36    |
| H21  | 6285.87  | 4656.68  | 9098.92  | 50    |
| H22  | 7047.96  | 4114.45  | 10544.62 | 55    |
| H24  | 8659.05  | 6980.73  | 9226.19  | 50    |
| H25  | 7915.65  | 7495.33  | 7789.78  | 48    |
| H27A | 8217.19  | 2902.59  | 6067.61  | 87    |
| H27B | 7474.97  | 1847.9   | 6711.29  | 87    |
| H27C | 8020.22  | 2370.88  | 7308.86  | 87    |
| H29A | 4894.35  | 4645.35  | 6344.16  | 81    |
| H29B | 5600.31  | 3304.79  | 6032.57  | 81    |
| H29C | 6317.38  | 4385.14  | 5477.82  | 81    |
| H30A | 5824.9   | 2961.35  | 8634.75  | 78    |
| H30B | 5290.57  | 2373.31  | 8078.13  | 78    |
| H30C | 4598.33  | 3784.35  | 8232.05  | 78    |

**Representative procedure for monitoring of the reaction progress by HPLC analysis:**

A Schlenk tube with a magnetic stirring bar was transferred to a glove box with a controlled atmosphere. The glove box maintained a nitrogen environment with water and oxygen levels below 100 ppm.  $\text{CuPF}_6(\text{MeCN})_4$  (1.864 mg, 5.000  $\mu\text{mol}$ ) was weighed within the glove box and added to the Schlenk tube. Using a microliter syringe, 5-(trimethylsilyl)thiazole **2a** (31.0 mg, 0.200 mmol) was subsequently added to the Schlenk tube. The Schlenk tube was then added a solution of methyl 2-(4-bromophenyl)-2-diazoacetate **1a** (107 mg, 0.420 mmol) dissolved in toluene (1.50 mL) in one portion. The Schlenk tube was sealed and then stirred inside the glove box at room temperature. At different reaction time intervals denoted, the screwable cap of the Schlenk tube was opened, and a small amount of sample was acquired using a glass pipette. The glass pipette was removed from the glove box, and the sample was diluted with HPLC-grade acetonitrile (1.0 mL). The diluted sample was analyzed by HPLC analysis using a Supersil ODS2 3 $\mu\text{m}$  column and an eluent comprising a mixture of acetonitrile and water (80:20) at a flow rate of 1.67 mL/min with a detection wavelength of 220 nm. The same operation was repeated for the reaction time intervals denoted in the table below. The resulting data constitute the peak area percentages under HPLC analysis, excluding toluene peaks.

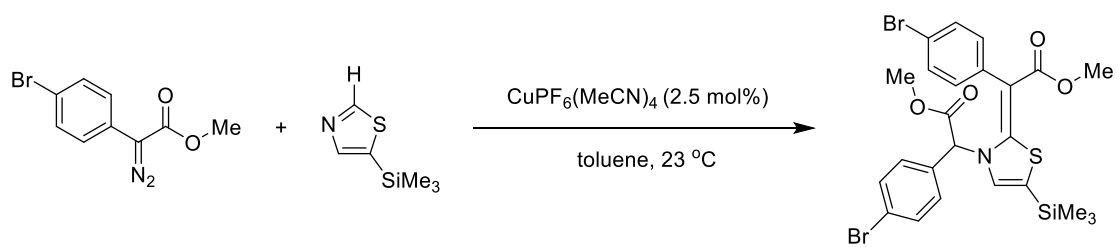

1a

2a

3a

| Time/min | HPLC peak area of 1a | HPLC peak area of 3a |
|----------|----------------------|----------------------|
| 5        | 88.0                 | 0                    |
| 15       | 83.7                 | 3.8                  |
| 30       | 78.9                 | 9.0                  |
| 60       | 69.5                 | 18.8                 |
| 120      | 52.3                 | 39.1                 |
| 180      | 38.0                 | 55.0                 |
| 240      | 23.1                 | 65.4                 |
| 300      | 11.7                 | 69.9                 |
| 360      | 5.8                  | 71.8                 |
| 420      | 3.0                  | 73.3                 |
| 480      | 1.0                  | 74.6                 |
| 1140     | 0                    | 75.6                 |

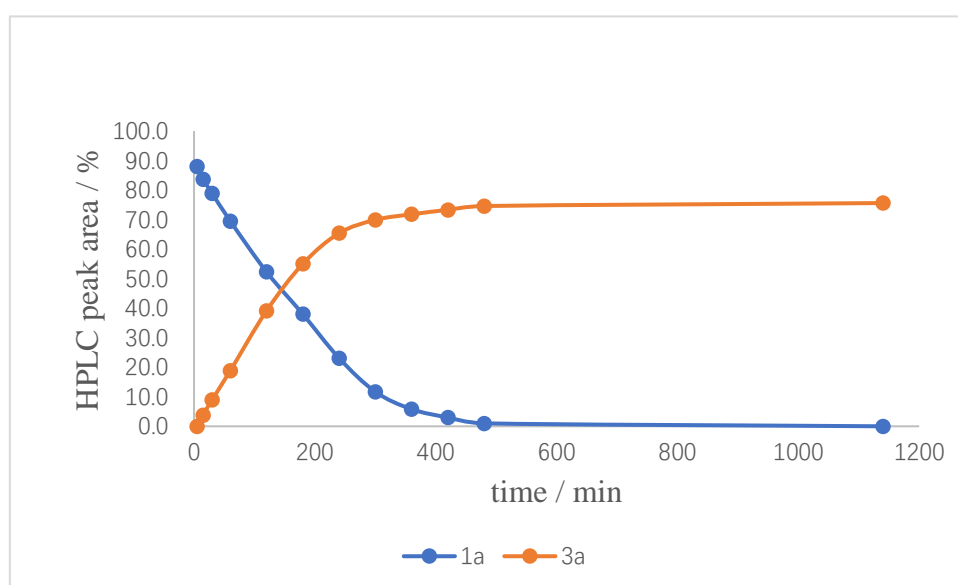





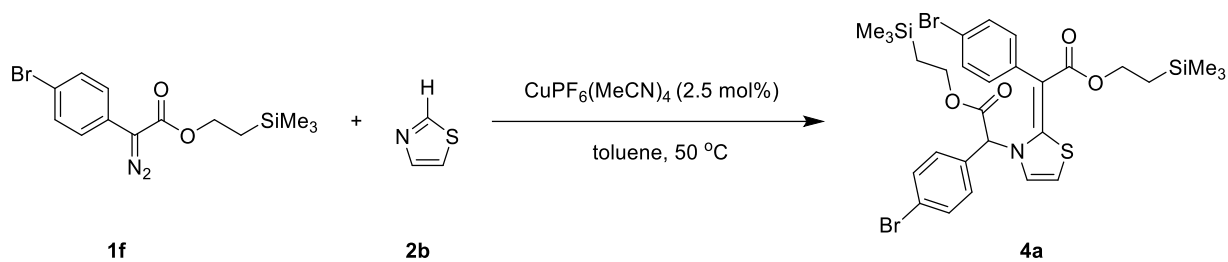

| Time/min | HPLC peak area of <b>1f</b> | HPLC peak area of <b>4a</b> |
|----------|-----------------------------|-----------------------------|
| 5        | 93.1                        | 0                           |
| 15       | 84.5                        | 9.2                         |
| 30       | 74.6                        | 20.0                        |
| 60       | 49.8                        | 47.6                        |
| 120      | 7.2                         | 92.8                        |
| 180      | 0                           | 96.6                        |

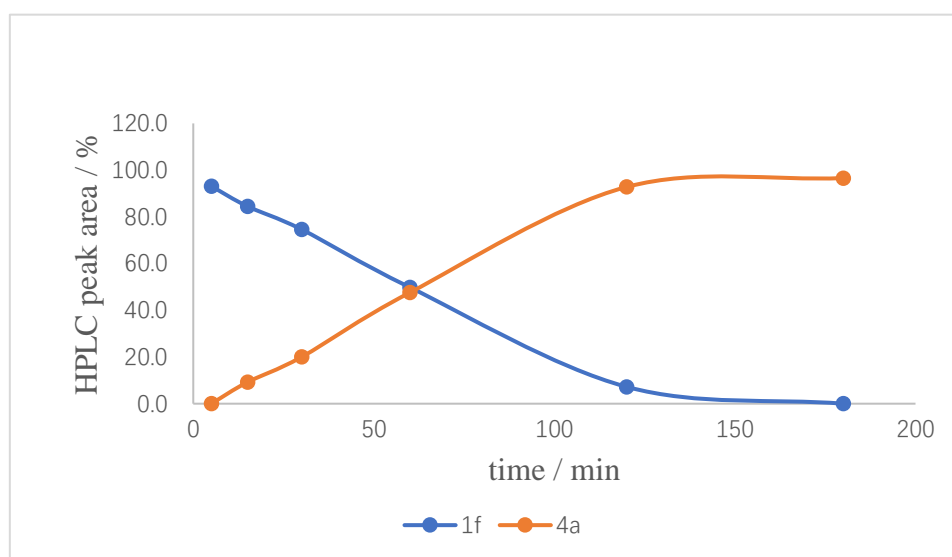





## The study of the kinetic isotope effect:

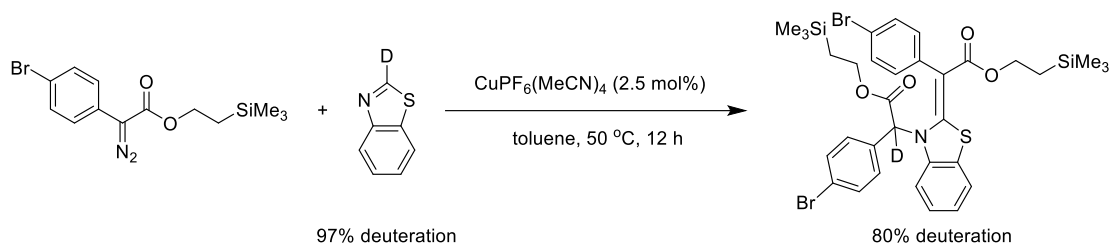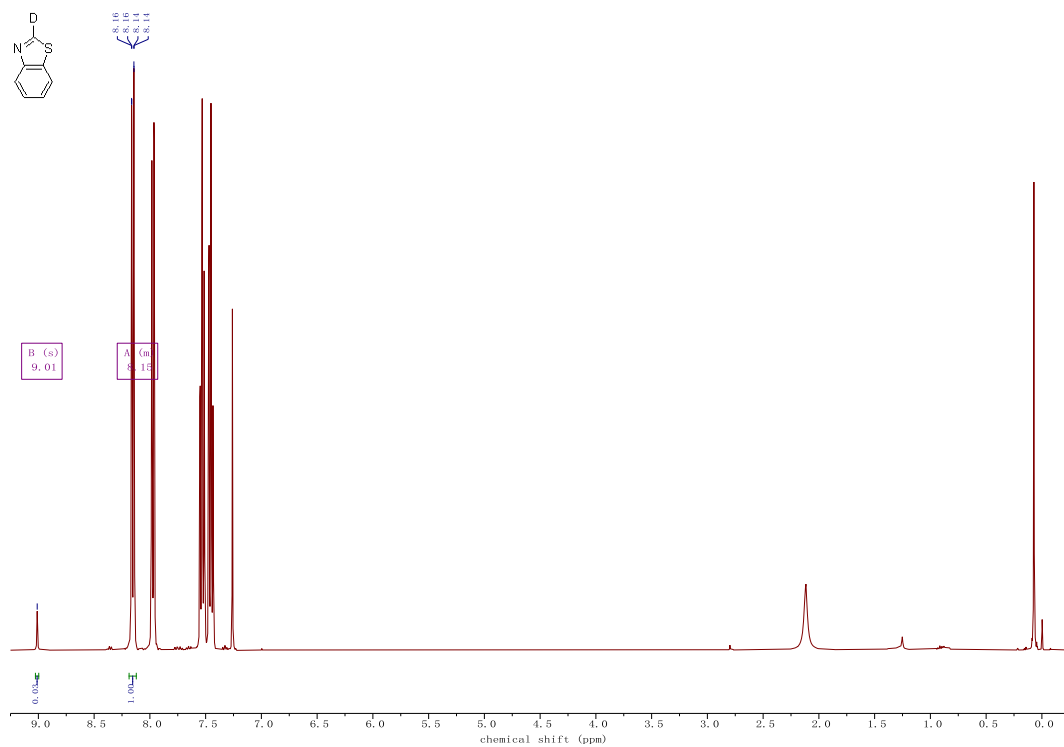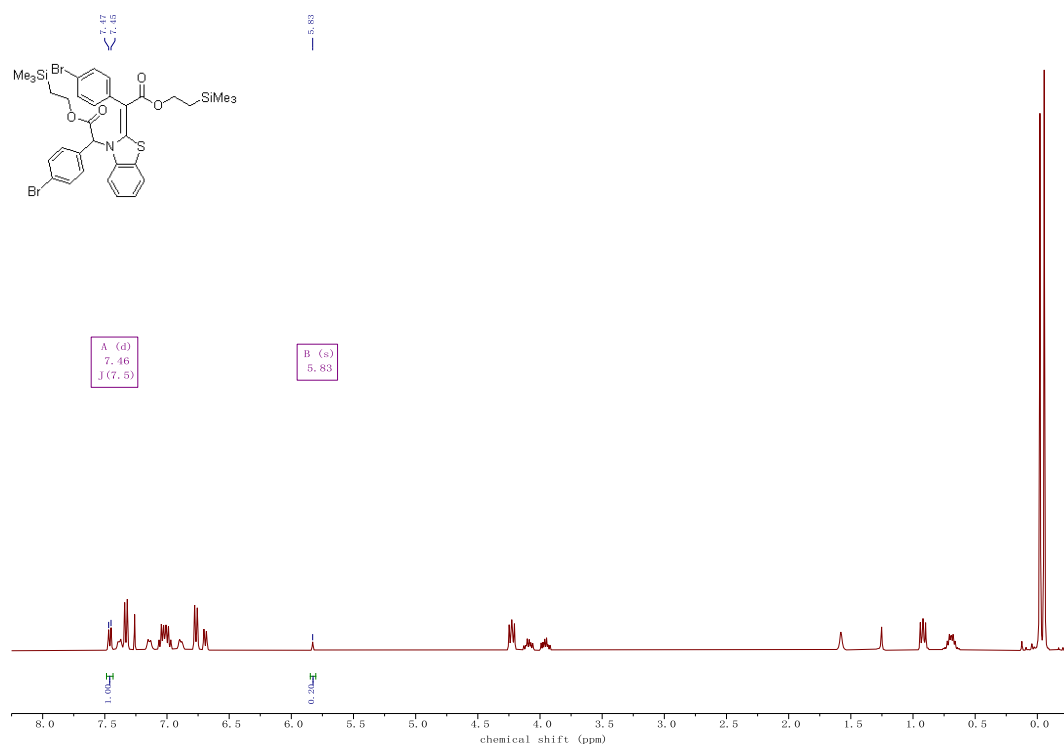

Supplement: d4qo01233j1.pdf [file d4qo01233j1.pdf]
